# Supplementary material for: Systematic analysis of human lysine acetylation proteins and accurate prediction of human lysine acetylation through bi-relative adapted binomial score Bayes feature representation
Source: Royal Society of Chemistry journal article supplement (doi:10.1039/c2mb25251a), 2012-08-13
Supplement: c2mb25251a.xlsx [file c2mb25251a.xlsx]

## Sheet: Table S1
Table S1 Independent Test Data Set which contains 29 acetylproteins with 64 experimetnally verified acetylated lysines (including 14 proteins with 17 experimentall verified acetylated lsyines used by PLMLA(ref.39), which are colored in red. ) and 64 randomly selected putative non-acetylated peptides.
Uniprot ID	Acetylated Position	15-mer Acetylated Peptides
A1X283	17	VKVLDVQKRRVPNKH
A6H8Y1	211	EQEKKTEKPSTPVQT
A6H8Y1	208	SSLEQEKKTEKPSTP
B1ALW1	74	GEFSGANKEKLEATI
O00244	57	TLLATLKKTGKTVSY
O00244	60	ATLKKTGKTVSYLGL
O14561	92	YVLKLYDKIDPEKLS
O43298	247	HKRWIHVKPERLEQA
O60218	69	KIQEKAVKREDLFIV
O60218	27	TWKSPLGKVKEAVKV
O60218	125	SGDDLFPKDDKGNAI
O60218	179	NKPGLKYKPVTNQVE
O60218	95	LVRKAFEKTLKDLKL
O60218	263	RNVIVIPKSVTPARI
O95336	180	APISDSPKPPPQRVT
P00352	367	SGKKEGAKLECGGGP
P00352	410	GPVQQIMKFKSLDDV
P00352	419	KSLDDVIKRANNTFY
P00352	252	TGSTEVGKLIKEAAG
P00352	435	LSAGVFTKDIDKAIT
P00352	128	NDLAGCIKTLRYCAG
P00352	353	IDKEQYDKILDLIES
P07108	17	AEEVRHLKTKPSDEE
P07108	77	AMKAYINKVEELKKK
P07108	19	EVRHLKTKPSDEEML
P07108	55	LDFTGKAKWDAWNEL
P11766	366	FELMHSGKSIRTVVK
P30153	280	AVGPEITKTDLVPAF
P30153	561	STLQSEVKPILEKLT
P33076	144	EVGQKSQKRPFPEEL
P33076	141	MPAEVGQKSQKRPFP
P33176	764	TDQEKSRKLHELTVM
P33176	166	KNRVPYVKGCTERFV
P33176	28	SEVNRGDKYIAKFQG
P33176	761	LKATDQEKSRKLHEL
P41212	302	DGLHREGKPINLSHR
P41212	11	TPAQCSIKQERISYT
P43694	321	GIQTRKRKPKNLNKS
P43694	323	QTRKRKPKNLNKSKT
P43694	319	KEGIQTRKRKPKNLN
P43694	312	PRPLAMRKEGIQTRK
P56378	14	KNIWIPMKPYYTKVY
Q16186	21	GSRGASNKYLVEFRA
Q8NEH6	335	QAEIYKSKLKEEAEK
Q8NEH6	333	EEQAEIYKSKLKEEA
Q969T7	248	KIGFLNDKVEERRER
Q9BQE3	112	RGHYTIGKEIIDLVL
Q9BQE3	60	FSETGAGKHVPRAVF
Q9H0C2	104	QALNFAFKDKYKQLF
Q9H2P0	1042	KVEGFWSKDQSQWKN
Q9H2P0	1035	WKNSSYGKVEGFWSK
Q9H9A5	177	HLLAVLEKMISQGNN
Q9NRA8	486	GDMTAFNKLVSTMKA
Q9UDR5	707	YPNRDSTKYAEIYGI
Q9UHB7	79	PKLVAIPKPTVPPSA
Q9UK32	367	FDPEFTAKTPKDSPG
Q9UK32	348	REVQPPFKPASGKPD
Q9UK32	386	ANAHQLFKGFSFVAT
Q9Y2Y9	166	DLESPQRKHKCHYAG
Q9Y2Y9	180	GCEKVYGKSSHLKAH
Q9Y2Y9	225	YRTHTGEKKFSCPIC
Q9Y2Y9	234	FSCPICEKRFMRSDH
Q9Y2Y9	168	ESPQRKHKCHYAGCE
Q9Y2Y9	226	RTHTGEKKFSCPICE
		15-mer randomly selected non-acetylated Peptides
		PLLVPRVKVAEDGSI
		TVEVLRTKGPCVVEE
		YSKPWSNKETDMFFL
		NKFKREEKTNGWRID
		TATSTKEKQPCSDRY
		PATDSASKPAEPTDV
		APRSSTEKTGGDNDV
		EKKQWKNKYAINESQ
		STVSQRRKRISSTSS
		SSTSSLVKSSVSVPS
		QPTATSTKEKQPCSD
		AGKAAERKEILISQE
		EIGANVEKNENESCA
		HMEDQSRKDFEEEDV
		PLMLIAPKPQDKKSM
		ECGNALEKNAQESKS
		DVILQPEKNDSFQNV
		NVQPDEPKVLNECLS
		SKESALAKIDAELEE
		VEEQYLNKLTSCPQP
		SKIALDGKTTISSTS
		RGERRSHKKFKPNVT
		GEAKGIIKEGRTILP
		GERRSHKKFKPNVTR
		RRSHKKFKPNVTRGR
		PTRNTISKVTSNLRI
		VTRGRGSKRVRGKTS
		KKEPRASKAMLVTLR
		LAPEEVNKAPVFVPV
		IIPHVHSKDKSHIPS
		PHVHSKDKSHIPSSL
		SLDNVNHKIVHECQE
		NHSLKEKKSTKPRKN
		MHTPVEEKRNSEKEV
		SSHFSHFKISSQTHE
		SQTHESDKTEVQGIQ
		FSDINLSKSLPQEQK
		EQKPLEIKPAPFVRS
		RSRFKRPKPNLARAA
		YEKKSETKKMETIVM
		EKKSETKKMETIVMQ
		SLMISREKDTLGHRN
		IDQTENVKPMLRGRF
		PSNSCEPKEESQSAP
		SQSAPVQKNDSVVSV
		NQKKRRRKKQDGANE
		QKKRRRKKQDGANEL
		LKEGECSKEQMLSCT
		EERNVDLKNNSLEID
		PKDETEKKVLTVSNS
		VENLHVNKTNETIRH
		ETIRHENKPYVPSSA
		SAQMTRRKFQKAKPN
		QAVYYCKKCTYRDPL
		PLYEIVRKHIYREHF
		VAAPYIAKAGEKSLN
		EESSIHCKRCLFMPK
		KTEHGSRKRTISQSS
		ISQSSSLKSSSNSNK
		KNSSSTSKQKKTEGK
		RGRLQKPKPNAGKAA
		VRLDTSPKEMVPAEI
		SSKPRRTKLVFDDRN
