# Supplementary material for: Systematic analysis of human lysine acetylation proteins and accurate prediction of human lysine acetylation through bi-relative adapted binomial score Bayes feature representation
Source: Royal Society of Chemistry journal article supplement (doi:10.1039/c2mb25251a), 2012-08-13
Supplement: c2mb25251a_2.xlsx [file c2mb25251a_2.xlsx]

## Sheet: Table S2
Table S2 Training Data Sets(2873 15-mer positvies and 2873 15-mer negatives with 40% homolog elimination)
Positives	Negatives
RNSRAYSKNVEGQDL	LENLFFEKPDEVENH
WSLWEQSKWHRRNSR	EEELESHKLLGQEKR
KIDAHLNKVCPTTET	HKLLGQEKRPKMLTS
GESQSGGKYKTRLKQ	LGQEKRPKMLTSNLK
AMTSAPSKDQVQLKD	KMLTSNLKITNEDTN
KKTAILVKEVNPKKK	NYISLTQKFQFAFPS
CKVLVESKLRGRTLE	QFAFPSDKYEQDDLN
MYKTDLEKDIISDTS	DLSHIAGKLTYASQK
ESEPSEMKAMALKGG	TYASQKYKNHIGTEI
GWGYNDSKFIFNKKG	GTEIAPEKSVPDDTK
TPRGIIEKSCQGPRM	KSVPDDTKLVNFAED
WYVPLSLKNVDKVLE	LVNFAEDKGESTSVF
DAINFHDKIRKGCVI	VFRKRLFKISDNIHG
KKLLDDIKMLNKPKD	DSHIGSVKIVQTEMN
HNIRIMAKYYTRITM	IVQTEMNKGKSRNYS
FQEENTEKLKLKYYN	QTEMNKGKSRNYSNS
KTTHLIAKEEMIHNL	SRNYSNSKQKFQYSA
PPPGKSGKYYYQLNS	NYSNSKQKFQYSANV
PQVELFVKAGSDGAK	EIGEGMFKAPSFSVA
MFTPLTVKYAYYDTE	ENGLGSLKAVTEIPA
AARNILEKHSLDASQ	AVTEIPAKFRSIFKE
SDNAHSVKQQNTMKY	AKFRSIFKEFPYFNY
GTLKLEDKQRLAQEE	YFNYIQSKAFDDLLY
SSVDQAGKYSKTVAS	PLPWLNIKIVYMAPI
GDRSGFGKFERGGNS	IVYMAPIKALCSQRF
IGFPLMIKASEGGGG	SQRFDDWKEKFGPIG
GFHLHGEKGKLGQYI	RFDDWKEKFGPIGLN
LVRYFLDKTLTSRLG	IIMTTPEKWDSMTRK
RKHIEDEKLVRYFLD	KWDSMTRKWRDNSLV
IPKFGIEKEVRVCEP	IDEVHIVKDENRGPT
EVVREFMKDTDSINL	QSVSQTLKNTSTAIP
KQLGSILKTNVRACK	DESHRPVKLQKVVLG
NYKEEVKKNILLEEK	HRPVKLQKVVLGFPC
KSGAKWTKVHELKEH	SSNQTEFKFDLTLNY
AKTSDFLKVLNRARP	FDLTLNYKIASVIQM
GPAPRETKDTDIVDE	IQMYSDQKPTLVFCA
DEAIYYFKANVFFKN	LVFCATRKGVQQAAS
EKYQQLQKDLSKSMS	QAASVLVKDAKFIMT
VRLGVVEKKKINNNC	SVLVKDAKFIMTVEQ
RIMTPSVKVEKIHPK	FIMTVEQKQRLQKYA
IEFYELDKKENIRQK	EQKQRLQKYAYSVRD
QDIERYSKRYMKVYK	AYSVRDSKLRDILKD
ETSGSQKKSQDKGPK	SKLRDILKDGAAYHH
PVEINSKKETSGSQK	GMELSDRKVVEGAFT
GLVEEDDKDKAKRVS	PAHLVVIKSTMHYAG
AKRVSRNKSEKKRRD	TRLSTRDKYIQMLAC
LEYDFPEKFFPKARD	LLYIRALKNPSHYGF
GEDYPSGKKRAGTDG	NKDGIEAKLQELCLK
IRTCTDIKPEWLVKI	LSSLDLIKMDEGVNF
MRSLPGPKRGVACTQ	MDEGVNFKPTEAGRL
DGTQNKRKIALEDVP	YITFETVKKFYTISG
TGDGTQNKRKIALED	ITFETVKKFYTISGK
LVAPVVKKPHIYYGS	KFYTISGKETLSDLV
MREKELIKREQAVEK	VTLIAGCKEFLDIQL
LTVQEKEKYLNVSRW	KTLNTLNKDPNRITI
LSSVVFIKNRLYTNS	FPMEGRIKTREMKVN
IHTDAFSKRSDLIQH	RIKTREMKVNCLIQA
EDRGAAVKAMDEMNG	ALTQDTAKIFRHGSR
AFLCGVMKTYRQREK	DFVAAQEKKFAVLLN
IKGYQWLKDKVQSED	FVAAQEKKFAVLLNS
VKETQEDKLEGGAAK	LNSLILAKCFRCKLW
LLTPLMEKFKILLEK	LAKCFRCKLWENSLH
QALSNEKKAKKVRFY	HVSKQLEKIGITLSN
QRRESSLKYQTRCIR	PPFGTQIKETVMYLP
IINSKWEKVQQLVPK	ETVMYLPKYELKVEQ
HKINNVNKALDFIAS	YLPKYELKVEQITRY
ALKGIDYKTVPINLI	WAKKIAVKRALKSED
LKLIASQKFTDKRIG	VGLDIQQKLTVFYLE
NKYIQQTKPLTLERT	TVFYLEPKRFGNQIT
TKEPLYEKDSSVAAR	NQITMQRKSETQISH
GVTQFGNKYIQQTKP	ETQISHSKHSDISTI
TRLIHLNKIDPHAPN	STIAGPNKGTTASKK
AHEDRHIKFYDNNTG	NKGTTASKKPGNREC
HIVKMLEKYLKGEDP	KGTTASKKPGNRECN
AKSQRIAKFAFDYAT	RECNHLCKSKHTCGH
QNMASEEKLEQVLSS	CNHLCKSKHTCGHDC
STTTDFIKSVIGHLQ	TCGHDCCKIGVAQKS
VQTAELTKVFEIRTT	VAQKSEIKESTISSY
DNAAIIMKVDKDRQM	VPPVKRLKIQMNKSQ
PMLIPKEKPPITVVG	KSQSVDLKEFGFTPK
DILNSAGKMDKMRLL	KEFGFTPKPSLPSIS
EIYGIENKNNQETKP	DQPEIYGKVRQEPSE
VPKSFFSKQPVRNKH	EPSEYQDKEVLNVNF
PTKPYGTKFDRRRPF	STDTEKTKISGFGNT
RNKLENGKPLSMSEQ	SSSTRGSKLPLQESK
AITQLRNKLENGKPL	PLQESKSKFQREMSN
QELQCFCKYLQRWRE	IVHFQERKPQNLSPE
GLYPPRAKLVIQRHL	NLSPEIEKQCFTFSE
KQHYIDLKDRPFFPG	QCFTFSEKNPNSSNY
LFDHAVSKFGKKDSL	NPNSSNYKKVDFFIR
YIQKTLFKIGYDYKL	PNSSNYKKVDFFIRN
ELSTQVIKSASSKSV	FIRNSECKKEVDFSM
KVHAAADKHNSVEDS	IRNSECKKEVDFSMY
IRVGGALKAPSQNRG	EREEKFRKMKSSVHS
RIIEREEKIDRRILD	IPGDLTLKTCGSTAS
RSVTSPRKPRTPRST	CGSTASMKVKHVKKL
YAASCRIKRVTQKEE	STASMKVKHVKKLPF
GTAIKDLKNPDRVLI	SMKVKHVKKLPFTKG
RIHKKMLKPAFIFDG	MKVKHVKKLPFTKGH
KGRAADLKYIEACAR	VKKLPFTKGHFPKMA
ASLDSLRKGGPPPPN	FTKGHFPKMAECAHF
RDFEQISKTIRKEVG	EEQNEVMKNGCESKE
RSNGAIQKIVAFENA	VQIACQGKSWIVKRS
KKQKKNTKDEFEERA	EDFRVLDKHLHLCIY
PNNQVLGKIERAIGL	LSAIAGNKINCGPAL
MNLNEEKKAPLRNKD	TWMEIDNKGNHLLVH
NLISAFQKPDQGIVI	VGAAHVIKRYTARAP
SPRHEKMKTGLIDKT	SVIDMPPKVLSTWWR
VRNAVFGKVAQNSIR	LSTWWRGKHGFQVGL
RQTGALSKAIDRGTR	CVELINQKVPQSVTN
KIEKMKEKRQAKYTE	SVPKPVSKKHGKLIT
VKKIEKMKEKRQAKY	VPKPVSKKHGKLITF
TQKEHLLKYEYQPFA	TFLRTFMKSRPTKQK
SLTERLGKRKFSAGG	RPTKQKLKQRGILKE
KEKVMYEKEAKQQEE	LKQRGILKERVFGCD
VNEHDLLKLKKFTED	EHVPDLTKEPYVQDI
YLEKYRPKQRLRFKD	HSVGSLCKLYFRELP
TKTSRSAKAGVIFPV	LTYQLYEKFSDAVSA
DAGKAPLKIFAQDGE	SITNMHAKNLAIVWA
KLVAQLYKIVPNVLL	APNLLRSKQIESACF
LPNDPMFKLVAQLYK	AASLSRPKSLLVSSP
NVLLEQGKAKNPWPN	SPIVTENKYIEVGEG
CQREFALKHLPNDPM	GPAALQGKFHTIIEF
GKDVSDEKLRDYIWN	IEFPLERKRPQNKMK
PASDYKDKYSHLIGK	ERKRPQNKMKKSPVG
QQYQSQAKQLFRKLN	KRPQNKMKKSPVGSW
KVKIELDKSARHLYI	RSFFNLGKSSSVSKR
SVPRRTLKMIQPSAS	EMKAMALKGGRAEGT
NALGSLPKEAARQNY	HAVDGDSKLFRPRRP
DLFREWLKDTCGANA	SFQCSPPKAESECLE
FELLELLKAHKKAIR	LDSPGYSKDKPSANK
VQQTVSAKGPPEKRM	SPGYSKDKPSANKKD
GTQLVKPKSEPQPNK	KDKPSANKKDAETGS
VPLKENVKYAVRLRN	DKPSANKKDAETGSS
KMGKTIHKYVHLFPK	PVSPLQEKLSPFFTL
EHSKEVIKPYDWTYT	PTEDKSSKPSSFTEK
KQTEGFRKRWFTMDD	FSPKIGRKLSKSPSM
NEKSPIIKPLIPKPK	KIGRKLSKSPSMSIS
WTTRCPYKDTLGPMQ	ASSSTWDKCVEERDA
IVSCRICKGDHWTTR	RSPTQIVKMKTNETV
RHYRMYQKGQETSTN	PTQIVKMKTNETVAQ
KQSQVIPKTVRIKQI	EEVELPGKEDQSVSS
AAPFGGFKQSGFGKD	IPPPPPPKNVARMLA
IYKDMLAKAIEPQET	QASTQSLKRPGTSQA
KQLKKEGKPTIVEED	YSAVALDKAYFQTDR
GTCGIADKPMTQYQD	YLSGDPEKARITSVP
PETKLDKKKYPYWPH	SVPLDSEKSDDHVSF
KVPVPEDKYTAQVDA	FPEDQSGKNSMPTVS
ETKLDKKKYPYWPHQ	HPLEFADKSPTPPNL
NAAVTYSKPRLATFW	ATAQMSTKEASWDVA
VPTFLFFKNSQKIDR	IGLNNSHKVQGVVPV
KFFTTPSKSVRKASH	VQPGLPEKVRDGARV
ISRRKNEKYLGFGTP	PTRMMESKMIAAIHS
KIYNYLDKYVVGQSF	PLPVPQPKHASQKTV
WKQKWRKKGECFGGG	QPKHASQKTVYSSFA
AWKQKWRKKGECFGG	SVPPHHNKLEQHQVY
GEIRVGCKYQAEIPD	NASGHHSKPCSRVEY
VYIPTYTKPNPNQII	YNPRLQGKSLYSYAG
KSLLSQNKFWKYGKH	MPPAADVKHTYTSWD
LSQNKFWKYGKHSVP	WDLEDMEKYRMQSIR
KGFEEVIKKFPRCAE	RESRARQKVKGPVMS
LRAAYFEKNHGTRES	LLSVAEGKESRHAAK
YVHRYVGKEPSGLRF	QSSLRSRKLPDMGCS
ELRGQYIKAVKKIKC	HRQFCESKNGPPYPQ
QYIKAVKKIKCDMLR	GQLDYGSKGIPDTSE
SKKKRHWKPYYKLTW	ESLRLNHKEVRLSKE
YDWTPAVKFACELEG	RQPSAPEKHSRDCYK
CISQSAVKTKFEQHT	KHSRDCYKEEEHLTQ
IMRNNFGKVLERGVK	PERSHSLKLHHTQNV
LSKTGEEKYVEESKA	YQYQPHGKRQSSVTV
EKSSRFMKVGYERDF	SRVTPGSKAALANLC
DYTHEFHKTKANFMA	LEAQNRIKGCTDNLT
NNANVLFKTKFVDGV	TVARSEHKVWSPLVT
AAKEKEVKKITDGLH	EGKRHPYKMNLASEP
ANVLFKTKFVDGVST	FNNALESKTAASGVE
VVIGGRNKYLINGVN	QELNEPPKQSTSFLV
SSYLEYQKVMREIEH	EILESEEKGDPNKPS
QAASILTKFQELKDV	EEKGDPNKPSGFRSV
LKVHAEEKLDRANAE	PSGFRSVKAPVTKVA
PTCKITLKETFLTSP	ASIGNAQKLPMCDKC
RSLKGLVKNIPQSTE	QKLPMCDKCGTGIVG
SISADTHKYGYAPKG	GIVGVFVKLRDRHRH
DFQQGCAKTLYHSVH	TDCGTNLKQKGHFFV
GGLVNYFKSKPVETP	CGTNLKQKGHFFVED
DKMDQDLKISQKHIN	EDQIYCEKHARERVT
KAFKFFQKDRKMALI	KAGSDGAKIGNCPFS
KQFSSFEKRAKIFCA	LFMVLWLKGVTFNVT
QTLYSKWKDFHFEKI	EVHTDTNKIEEFLEA
PRIKKKTKPIVKPQT	LCPPRYPKLAALNPE
EALLQAIKARNIRLS	AGLDIFAKFSAYIKN
PQQQESLKHATRIID	KGLLKALKVLDNYLT
PRQLFWEKKLSGLNA	DEGVSQRKFLDGNEL
RQTASIFKQPVTKIT	ADCNLLPKLHIVQVV
PSNPRPSKGKMMRCV	HIVQVVCKKYRGFTI
NPRPSKGKMMRCVRC	IVQVVCKKYRGFTIP
YTLEEIQKHNHSKST	VDCNRKRKGSSTDYQ
THVLPFEKINEGFDL	QESMDTDKDDPHGRL
QLIYNLLKEEQTPQN	TEHQGRIKNAREAHS
FIIPNVVKYSPNCKL	AMSRKLDKLTVLRMA
HPDLGTDKDKEQWKE	RMAVQHMKTLRGATN
TPKIVSGKDYNVTAN	PYTEANYKPTFLSDD
HPVSTMIKGLYGIKD	VVGCDRGKILFVSES
ERGRLLYKLADLIER	FVSESVFKILNYSQN
AYVNAIEKVFKVYNE	LFDYLHPKDIAKVKE
SLERKFGKHGGTIPI	PKDIAKVKEQLSSSD
PTTPEADKIFLERNI	RSFFCRMKCNRPSVK
SYGRLTFKYERDSNY	PSVKVEDKDFPSTCS
TLESPDIKYPLRLID	FPSTCSKKKADRKSF
AHRLFEYKEDSKLDY	PSTCSKKKADRKSFC
RTLVVHEKADDLGKG	SKKKADRKSFCTIHS
EKTAFKKKDTILSLN	IHSTGYLKSWPPTKM
YEGYPLWKVTFPVRV	VNGEIRVKSMEYVSR
SFLQRFFKFSRDVFL	QVLQTREKITTNCYK
SRDVFLPKPTWGNHT	KITTNCYKFKIKDGS
AYRDDNGKPYVLPSV	SFMNPWTKEVEYIVS
EFSIYMTKDGRISVA	PSGEGGPKRTHPTVP
EQVERLIKEFSIYMT	GTRAGAGKIGRMIAE
GAFTMVCKDADEAKR	QIIGQAKKHPSLIPL
KEIATVVKKRNLFAF	LGPNDQYKFYSVNVD
EGGGSSSKRFLRSCS	SGGSTASKGRYIPPH
SLELLEGKVLPGVDA	ATKGFYDKDSSGWSS
CGPESSKKYAEAVTR	GWSSSKDKDAYSSFG
AFRASLSKLGDVYVN	SRSDSRGKSSFFSDR
KAAVPSIKFCLDNGA	SDEDDWSKPLPPSER
EPVAVELKSLLGKDV	NTGINFEKYDDIPVE
DGVPMPDKYSLEPVA	CAQTGSGKTAAFLLP
FHVEEEGKGKDASGN	GEALRAMKENGRYGR
VDFNVPMKNNQITNN	NGRYGRRKQYPISLV
NDLMEYAKQHGIPIP	QIYEEARKFSYRSRV
RQRRNELKRSFFALR	VDMMERGKIGLDFCK
ASYQAARKDSGSPNP	KIGLDFCKYLVLDEA
EKRQAPGKRSESGSP	EQDTMPPKGVRHTMM
FLPSISTKENTLSKS	MFSATFPKEIQMLAR
SKVREEFKELKARNT	VWVEESDKRSFLLDL
AEFAEVSKLVTDLTK	DLLNATGKDSLTLVF
AWGPGAAKSGVGTAL	TLVFVETKKGADSLE
LNIFGVIKGFVEPDH	LVFVETKKGADSLED
EAPTDECKPVKWCAL	LHQFRSGKSPILVAT
RRGGRMLKHKRQRDD	GLDISNVKHVINFDL
GGRMLKHKRQRDDGE	ERNINITKDLLDLLV
PLMIKRSKKNSLALS	LDLLVEAKQEVPSWL
MKMKNYNKPWEPKWT	MAYEHHYKGSSRGRS
ESTGSIAKRLQSIGT	GSSRGRSKSSRFSGG
YLEGTLLKPNMVTPG	QYLSDGLKTPKGKGR
QSLPHENKPLTLSNY	GLKTPKGKGRAALRS
YSKHDMNKVLDLELK	NKAAEVLKVQKRRIY
EIDMNDIKAFYQKMY	EGIHLIKKKSKNNVQ
SDVAALHKAIMVKGV	GIHLIKKKSKNNVQW
DAYNTKDKIGVELTG	HLIKKKSKNNVQWMG
NLNVTEEKYQEALAK	TELSQEEKKLDELIQ
AHLQGGAKRVIISAP	VTYQDIRKISGLKDQ
GKFHGTVKAENGKLV	IRKISGLKDQTVIVV
CRLEKPAKYDDIKKV	TETHSPMKTNNQDHN
DLTCRLEKPAKYDDI	NIPKPASKDLASTNS
HAITATQKTVDGPSG	AAERGEMKAAAGQES
QILHGLDKVAEEWAQ	GPPQPLGKELQDGAE
IKVVPRRKAKIIRDY	PQDGGAGKGPADMAS
VVPRRKAKIIRDYGK	SPMDQMGKMRPQPYG
KRWQAIYKQFDTDRS	APSMTSSKGGQEDMN
HSSHLKSKKGQSTSR	PPGGMNRKTQETAVA
FLHSGTAKSVTCTYS	VKLTPATKMNNKADG
QSTSRHKKLMFKTEG	PATKMNNKADGTPKT
ELPPGSTKRALPNNT	LGGEPERKMWVDRYL
SSHLKSKKGQSTSRH	YLAFTEEKAMGMTNL
GQSTSRHKKLMFKTE	LTQVNKNKKWRELAT
VRAMAIYKQSQHMTE	TQVNKNKKWRELATN
RAHSSHLKSKKGQST	SSAASSLKKQYIQCL
SSPQPKKKPLDGEYF	SAASSLKKQYIQCLY
EEENLRKKGEPHHEL	CLYAFECKIERGEDP
SSSPQPKKKPLDGEY	FAAADSKKSQPKIQP
GVVEITGKHEERQDE	DSKKSQPKIQPPSPA
RNVESYTKLGNPTRS	MAEGGDLKPPTPAST
IQAVLLPKKTESHHK	GSDSTFQKRNSMTPN
VGNPFDSKTEQGPQV	RMSYEPNKDPYGSMR
KVEAKPKKAAAKDKS	DPYGSMRKAPGSDPF
KKVQTKGKRGAKGKQ	QQQQQNYKRPMDGTY
FGIYDTAKGMLPDPK	GTYGPPAKRHEGEMY
NSRMPVIKPDIANWE	ENRTSPSKSPFLHSG
LDVLASKKVQRPWRK	HSGMKMQKAGPPVPA
ASKCRKRKLERIARL	EATQPVLKQRRRLTM
IAASKCRKRKLERIA	WRVMMSLKSGLLAES
DATLDDIKEWLEDKG	LDPGRFSKVSSPAPM
AADDFRVKYETELAM	IAFSGKDKPASENSE
RDWSHYFKIIEDLRA	SEEKLISKFDKLPVK
VDEAYMNKVELESRL	LPVKIVQKNDPFVVD
QRGELAIKDANAKLS	FVVDCSDKLGRVQEF
RFLEQQNKMLETKWS	IQTHFESKTELLPSR
QNQGEVVKHYKIRNL	PCPPAPRKHVTTAEG
SNPPKPLKKLRFDIE	TLTEDGAKSSEAIKE
KHLPGESKFQQKLAE	EAIKESSKFPFGISP
DVARGVQKILQDYKS	LEDEPHSKDETPLCT
LLKTAIGKAGYTDKV	DWQDSLAKRCVCVSN
APNILENKEGLELLK	GNDFEMSKHPGLLLI
DKTRYMGKGVSKAVE	GLLLILGKLILLHHK
LKNVIKEKYGKDATN	KLILLHHKHPERKQA
CRSERLAKYNQLLRI	HHKHPERKQAPLTYE
DQLADLYKSFIKDYP	QAPLTYEKEEEQDQG
IEEELGSKAKFAGRN	DQGVSCNKVEWWWDC
YMGKGVSKAVEHINK	LVLETLSKLSIQDNN
KAVEHINKTIAPALV	PPFSRLEKLYSTMVR
IAPALVSKKLNVTEQ	VRFLSDRKNPVCREM
CKAGAVEKGVPLYRH	ARAIAVQKGSIGNLL
TEQEKIDKLMIEMDG	TFERLLDKATSQLLL
IVKTKVFKDFSELEP	KYAVNSIKKKVNDKN
RVRSGDWKGYTGKTI	YAVNSIKKKVNDKNP
AKFINYVKNCFRMTD	AVNSIKKKVNDKNPH
GCELKADKDYHFKVD	IKKKVNDKNPHVALY
GGSKVPQKKVKLAAD	EVMESVVKNCGQTVH
SLPKVEAKFINYVKN	VHDEVANKQTMEELK
ADKDYHFKVDNDENE	VEVNVRNKILYLIQA
SKGQESFKKQEKTPK	HAFRNEPKYKVVQDT
NQNGKDSKPSSTPRS	FRNEPKYKVVQDTYQ
KKKMQMLKLDKENAL	QDTYQIMKVEGHVFP
DIHFIHVKPPQLPAG	GHVFPEFKESDAMFA
SEIVQNGKHFKFTIT	QFGVMTRKHHCRACG
LVDVLEDKLKGEMMD	CGQIFCGKCSSKYST
DEVAQLKKSADTLWD	SKYSTIPKFGIEKEV
QRNVNVFKFIIPQIV	QQSQLPPKRDETALQ
DFNVPMKKNQITNNQ	STYTSYPKAEPMPSA
QLAPIWDKLGETYKD	NRNYWEKKQEEARKS
HLVHWNPKYNTFKEA	TTFVNRMKSNHMRGR
VHGGLINKKCYEMAS	YYEGLQDKLAQIRDA
VTVTKTDKTLVLLMG	LEIMRQKKQEYLEVQ
NVVRWEFKHPQPFLR	QMRLEQQKQTVQMRA
VCGKNPAKYYTLFGR	QDIGYFLKVAAVGRR
DTPAEQMKAEREQRI	ILRAFLEKARQTPHK
IEALGIRKPYIWEYS	KARQTPHKPFLLFRD
DVALDKLKGEMMDLQ	WLWLGLVKLGCAMAC
ILEKKVEKVVVSNRL	LNYNIRAKSLLHCFQ
REMLQQSKILKVIRK	CFQCCGAKVLLVSPE
IDQEELNKTKPIWTR	GIDSFLDKVDEVSTE
PITLFVEKERDKEVS	SGTTGLPKAAMITHQ
GNTSRRGKSGFNSKS	LTFVSGLKADDVIYI
RMPTPVIKAFGILKR	QFWDDCRKYNVTVIQ
SGYVQQVKYAMTRIK	KPNDRDHKVRLALGN
LGGELGSKIPVHPND	DVWRQFVKRFGDICI
VRSTMNFKIGGVTER	GFMNYARKVGAVGRV
MRSDHLSKHIKTHQN	GRVNYLQKKIITYDL
KSTGKANKITITNDK	RVNYLQKKIITYDLI
IFRTKYEKSLYSMIK	GYCVRVPKGEVGLLV
KGAGTDEKTLTRIMV	EVGLLVCKITQLTPF
KPLFFADKLYKSMKG	FNGYAGAKAQTEKKK
HEEHHAAKTLGIGKA	GAKAQTEKKKLRDVF
ENLCKLMKEILDKKV	VGDTFRWKGENVATT
KFYEAFSKNLKLGIH	RIGMASIKMKENHEF
MGYMMAKKHLEINPD	GMASIKMKENHEFDG
SRMKETQKSIYYITG	ENHEFDGKKLFQHIA
LNPRDLHKPIQEVII	NHEFDGKKLFQHIAD
TAEENSPKMRVIRVG	IEITGTFKHRKMTLV
ELEHALEKNEVDLVV	TGTFKHRKMTLVEEG
SDPIMLLKDRMVNSN	GFNPAVIKDALYFLD
LASVEELKEIDVEVR	YFLDDTAKMYVPMTE
TVRRMELKADQLYKQ	TSSHRPIKGILKNKS
SPCQDFGKRMFVFKI	IKGILKNKSSSGSSV
NYDTTESKLRREFEV	TIQDVKRKKSQKWDE
SKRTLLIKTVETRDG	IQDVKRKKSQKWDES
LAELEQLKGQGKSRL	YRDYDLMKANEPGTS
QDEIQNMKEEMARHL	SSEAYMRKILLHKQE
QEAEEWYKSKFADLS	MRKILLHKQEKKRQF
AARVIIEKYYTRLGN	ILLHKQEKKRQFEMR
YELKHALKGAGTNEK	LLHKQEKKRQFEMRR
LYDAYELKHALKGAG	PQGTNEEKTAAEESE
GQAFVIFKEVSSATN	YQDLLQVKTGLSLEV
AEVYHTLKGVIKDKY	MPSEFRNKSYHYTDS
YTNYEAGKDDYVKAL	RNLFSRQKAPLASFN
DVKQFRRKDSNLIVK	SYRDRRDKVAAGASE
DDKQPYEKKAAKLKE	RTVILGKKTEVKATR
EFEKLKPKYLEELPE	RPETIRTKPEEKMFD
EIQEIQLKEAKHIAE	ESQQMKEKAKEKDSP
QDLSEALKEATKEVH	EKDSPKEKSVREREV
IGRRPFTKNLGLEEL	RRAEVSPKGLQTPVK
GIEYKVGKFPFAANS	NIVTSILKQFTQSPE
KEEGIEYKVGKFPFA	ADSFPDTKVTYVDRK
GGIAHLFKQNKVVHV	KVTYVDRKELPGERK
NRRMKWKKESNLTST	KELPGERKTKTEIVV
SGWGRTEKRDRAVRL	LPGERKTKTEIVVES
EAGGVTGKGQDGIGS	YLLSKDIKEVGLKGK
AALSKKSKGQVKEEG	DIKEVGLKGKSAEQM
FMKLYEEKTGNAWHS	KEVGLKGKSAEQMIG
NKSEKRMKLTLKGGA	DIINLGLKGREGRAK
GQDGIGSKAEKTLGD	KGREGRAKVVNVEIV
TCKGCMEKIEKGQVR	VSYVSGEKPEEFSVP
GTVIGSNKLEQMPSK	EEFSVPFKVEEVEDV
SSEDTLLKDAAKVCR	PGPWGLVKEEEGYGE
CGRLFGEKFRHFNAL	VNQHRRTKQPQENTT
KFTRPLFKDLAAFDK	GTRRRTQKDGAVGEK
VINGQEVKYALGERQ	DLGSTHWKEQARSGE
GKARAKAKTRSSRAG	HEFHTSMKGISSKEP
EIKYGPLKMLPQTPS	SMKGISSKEPRQQLV
PRTPTPFKHALAAQE	GSVSVDVKKVQGAGG
PIKSTPVKLMRIQHN	SVSVDVKKVQGAGGS
CGPCKMIKPFFHSLS	LDLEELSKDEASEME
PRCGAHYKLVPQQLA	DEASEMEKAVESVVR
KVQIINKKLDLSNVQ	SQAARHIKLGPSEVW
SLGNIHHKPGGGQVE	GPISAAGKVGDYFAT
VPGGGNKKIETHKLT	RQLQLGPKEGFSGQI
IGSTENLKHQPGGGK	FTAPLSDKVELGVIG
KAKGADGKTKIATPR	RQTVMTEKSTFQSVV
LTFRENAKAKTDHGA	ADSPELGKLADSSRT
KHQPGGGKVQIINKK	RHIAPGPKETSFTFQ
MPDLKNVKSKIGSTE	QAVGVSFKASAGEGD
GAAPPGQKGQANATR	QAHREQGKEQAMFDK
FRENAKAKTDHGAEI	KEQAMFDKKVQLQRM
HVPGGGNKKIETHKL	EQAMFDKKVQLQRMV
DLSKVTSKCGSLGNI	RSVISDEKKVALLYL
QECLRACKKGFIQRI	SVISDEKKVALLYLD
ECLRACKKGFIQRIS	LTHSVLKKLKERQLE
FAVYLPPKAETGKCP	LRHSSEVKRLCCCES
GTDQSKWKAYDATHL	CCCESYGKINPELVC
KGIIDPTKVVRTALL	RYPMDFLKPTADCPD
VVVTEIPKEEKDPGM	VVAYWEEKTRVGRLY
RKGVITVKDGKTLND	NKSQLVQKVRSKIGC
EIANAHRKPLVIIAE	LVQKVRSKIGCGIQL
KIGIEIIKRTLKIPA	SSYPIFIKSATLDNP
IAKEGFEKISKGANP	VFPGFSIKAFDYEKA
RAYAKDVKFGADARA	IKAFDYEKAYSLQRP
SVWIGHKKGATKMKD	ENAAAGNKPEAVEVT
HQQKELEKVCNPIIT	ISNPNGDKTKVMVSI
EEFEHQQKELEKVCN	NPNGDKTKVMVSISL
GTLDPVEKALRDAKL	SISLKFYKELQAHGA
PKVQVEYKGETKSFY	LENLPASKDSIVHQA
TRIPKIQKLLQDFFN	VHQAGMLKRNCFASV
NHFIAEFKRKHKKDI	CFASVFEKYFQFQEE
REQGGKDKLQAHGIR	FQFQEEGKEGENRAV
NQKGEVYKAQIMNVS	VVFSTVFKDDDDVVI
VKLREELKPIAFARG	DDDVVIGKVFMQEFK
IRRFKSSKFGCRDPV	IHTRMRAKTSDFLKV
AFIRDVAKVKQENKL	SFTSPAVKRLLGWKQ
LHAVPAAKTVKFKCP	AVDSLVKKLKKKKGA
SPEKMEKKLHAVPAA	SCPGQPSKCVTIPRS
DIFHQQCKRNELVIR	RLQVSHRKGLPHVIY
WNRIIVEKPFGRDLQ	CEFPFGSKQKEVCIN
TEADELMKRVGFQYE	FPFGSKQKEVCINPY
LDLQALEKELVDRHG	PQLSLLAKFRSASLH
SNLYINVKLKAAEEI	NTRRHIGKGVHLYYV
IGQAPTEKGHTRTAQ	FHPATVCKIPSGCSL
QFLNLMEKLNENIKI	IPSGCSLKVFNNQLF
VRTVPQYKYAAGVRN	EVVYELTKMCTIRMS
IFIKNLDKSIDNKAL	GPLQWLDKVLTQMGS
GVGNIFIKNLDKSID	CDGQNPPKKQAGSKF
VNLTSMSKILKCAGN	DGQNPPKKQAGSKFH
IADMGHLKYYLAPKI	HFVASSSKDERQEDP
TSMSKILKCAGNEDI	DPYGPQTKEVNEQTH
EGAKAFFKGAWSNVL	SSGFILTKDQPVTAN
FAFKDKYKQLFLGGV	KLTATIWKNLSNPEM
GIAAAISKTAVAPIE	EMTSGSDKINYTYML
IFLGGVDKHTQFWRY	TRCIQACKTNPEYIY
RYFSEADKIKVAQGV	EYIYAPLKEIPPADI
TSNEHLQKHVEDLLT	IPPADIPKNKKLLTD
TQLDFASKRYEMLQD	LAVKLLQKRIEVRVV
DLRSQNTKISTQLDF	EVRVVRRKFKHTFGE
SLHERNQKLTATTQK	RVVRRKFKHTFGEDL
PPASIRPKTDDTSSQ	YEFPPALKPPEDLVV
GSGSKRPKVEYSEEE	PIFNASAKHWTNFVI
KEETEELKRFDDPGL	NKMSIEYKYEMMPNR
ATPEQVGKMKAIVEK	YGTKKTSKHAAADEA
LEASGDYKYSGRDSL	EALKILQKTQPTYPS
EGKVTKRKHDNEGSG	QPTYPSVKSSQCHTG
PDYNPEGKVTKRKHD	SPRGSGKKKDIKDLV
NPEGKVTKRKHDNEG	PRGSGKKKDIKDLVV
HGPSFPLKGITEQQK	SGKKKDIKDLVVYEN
DIIIHSLKKCDISLQ	RMTGLRWKCKVILES
SIRIAAYKSILQERV	TGLRWKCKVILESEV
MKYKSEGKCFSVLGF	VGVKKTVKYEAAGEA
DLSSRFSKSQLDIII	GEAVKTLKKTQPTVI
FGCRHFSKTNELLQK	PTVINNLKKGAVEDV
LPEVAHVKHLSASQK	TVINNLKKGAVEDVI
ELYRIKFKESFAEMN	ISVKEQHKREGLGLD
PANGKFSKSATSPEG	ERVNKIAKRDIEQII
ETAKLIEKLDIKLDS	ELTNDERKQIHQIAQ
KKEDLYLKPIQRTIL	QIHQIAQKYGLKSKS
YVAKFAAKGEGQLGP	IAQKYGLKSKSHGVG
FAEMYVAKFAAKGEG	VVGRKRRKEDLLDQL
YFDPANGKFSKSATS	QTCREEHKKKNPEVP
CAQGCICKGASEKCS	NFAEFSKKCSERWKT
NYAVELGKNQAKFSL	KKCSERWKTMSGKEK
STDIKDSKAYYHLLE	KTMSGKEKSKFDEMA
LKSTDVAKTFRKAIN	SKFDEMAKADKVRYD
GNFSTDIKDSKAYYH	VRYDREMKDYGPAKG
SSSISSFKDPKISTS	SEFRPKIKSTNPGIS
ISFDEFIKIFHGLKS	ISIGDVAKKLGEMWN
DVVRGNPKLNLAFIA	SIGDVAKKLGEMWNN
ENLNDDEKLNNAKYA	EKDVADYKSKGKFDG
YLSQQWAKASGRGEV	DVADYKSKGKFDGAK
NTGVWLVKVPKYLSQ	ADYKSKGKFDGAKGP
LQIEESSKPVRLSQQ	LSQPNTVKCSGDGVG
AQNRSYSKLLCGLLA	EVALYCAKYLPDIIK
GVDKPDPKTWKANFR	KYLPDIIKDQKAYKE
KEQRWGAKTIEGSGR	PDIIKDQKAYKEGKL
GARGLKAKFESMAEE	QKAYKEGKLQKALED
PEQYQILKENYGQKE	AFLAIDAKLTTEEVI
SRSVETLKEMIKSGM	LTTEEVIKELAQIAG
EYHAETIKNVRTATE	RYGQNCHKGPPHSKS
GEKGKNIKIISKIEN	QENGPTAKAYTGFSS
GAIIVLTKSGRSAHQ	SCSSASDKLPRVAKS
GTAEVELKKGATLKI	DKLPRVAKSKFFEDS
LDYKNICKVVEVGSK	VVALIRGKQLIVANA
AKPSATGKVIDKKLP	CVVSEAGKALDMSYD
NAVAFRFKDKERPRG	LDMSYDHKPEDEVEL
EDGSCSYKDFSESRN	AIGDHFYKRNKNLPP
GLLEWESKSDALETL	DHFYKRNKNLPPEEQ
DLSTPNEKLLGHLVK	ISALPDIKVLTLTDD
HTSRAKGKQCFLVLR	VVDFIQSKISQRDEN
HKPKGTFKDYVRDRA	TCIIICFKPRNTAEL
LKHQILPKEQWTKYE	CPPNFTAKPPASESP
TNVKALQKSPGPQRE	LSGSQIVKGKLAGKR
PQGLALAKEIDSVKY	GSQIVKGKLAGKRHR
EFETGFEKGGQTREH	VKGKLAGKRHRYRVL
RCLLWACKACKRKTT	LLTSGKKKKEMQVTE
ACKACKRKTTNADRR	PEMDVRKKKKKKNQQ
KGFPTWLKLDKKVSA	EMDVRKKKKKKNQQL
SRCRQKRKVWVQSLE	DVRKKKKKKNQQLKE
RVHTHFLKEMKEALG	VRKKKKKKNQQLKEP
IKYNVEVKHIKIMTA	KKKNQQLKEPEAAGP
SRKDITGKLKDPANF	VLFPSTTKKRKKPKG
SVGHHLGKSIPTDNQ	STTKKRKKPKGKETF
AFGAPLTKLQVIQFK	ETFEPEDKTVKQEQI
SRRPSYRKILNDLSS	EPEDKTVKQEQINTE
QSSCKDLKRLFSGTQ	LSPTKKRKRQKGTEG
KPAAAGVKKVAKSPK	VESQPQVKVEPLEEA
KPKAAKPKAAKPKAA	AIPLPPTKKRKKEKG
TIPAPAEKTPVKKKA	LPPTKKRKKEKGQMA
PVSELITKAVAASKE	PPTKKRKKEKGQMAM
TELKGLSKIERANAC	TKKRKKEKGQMAMME
WSARDIQKWEYVPLG	PQQPEGAKPQAQAAL
LILSPRSKESVPEFP	APKKKTKKEKQQDAT
ERLREKDKHIEEVRK	PTSTKKKKKKKERGH
FINRNDTKEDVFVHQ	STKKKKKKKERGHTV
LSLHQRIKNGEKPFE	RATPGSTKKRKKQSQ
KGAAKTRKTTTTPGR	ATPGSTKKRKKQSQE
VFSAAGFKDIRSYRY	PGSTKKRKKQSQESR
FRRIDWEKLENREIQ	GSTKKRKKQSQESRM
KGAENFDKFFTRGQP	EAPTGRDKKRKQQQQ
PTHPPDKKLSKNEIL	APTGRDKKRKQQQQQ
NEEIAFLKKVHEEEI	QPPPQPRKKRPEDFK
DYPHRVAKFPENRNR	PPPQPRKKRPEDFKF
PNKIMTEKYNGNRIG	KKRPEDFKFGKILGE
IYQYVINKERKGDYL	TSREYAIKILEKRHI
KFGNPGEKLVKKKWN	YAIKILEKRHIIKEN
PGEKLVKKKWNLDEL	LEKRHIIKENKVPYV
AMLWLSEKLREVYRK	RHIIKENKVPYVTRE
LRIDDLIKLHPESKD	LDHPFFVKLYFTFQD
HDALCVVKRVLESKS	FTFQDDEKLYFGLSY
VNSVNILKAHGRSQM	YFGLSYAKNGELLKY
PGMTKMAKMIDERQQ	ELLKYIRKIGSFDET
STSPEPSKIMLVEPP	ITDFGTAKVLSPESK
KHGEAQVKIWRRSYD	KVLSPESKQARANSF
EEIVPQIKEGKRVLI	SPELLTEKSACKSSD
GGLTGLNKAETAAKH	NEYLIFQKIIKLEYD
EALTGECKELEKKNE	LIFQKIIKLEYDFPE
IQKLFVDKIREYKSK	FPEKFFPKARDLVEK
TFKFEDPKFEVIEKP	LHQQTPPKLTAYLPA
GKNQGDPKKMAPPPK	EKRLLLEKQAGGNPW
KKTVTPAKAVTTPGK	VENNLILKMGPVDKR
VGNLNFNKSAPELKT	LKMGPVDKRKGLFAR
ALVATPGKKGAAIPA	MGPVDKRKGLFARRR
KGAAIPAKGAKNGKN	DPVNKVLKGEIPWSQ
KVTLDWAKPKGEGGF	QELRPEAKNFKTFFV
NARSQPSKTLFVKGL	RPEAKNFKTFFVHTP
PSKTLFVKGLSEDTT	DPSGNAHKWCRKIQE
DARTLLAKNLPYKVT	NAHKWCRKIQEVWRQ
GISDVFAKNDLAVVD	EDYPSGKKRAGTDGK
FEKATFIKVPQNQNG	RYYDILKKRLQLPVW
RGGTNIIKLIDTVKD	QLPVWEYKDRFTDIL
CGDRSSGKHYGVYSC	DILMGVLKEVVRQRS
TMDTESKKDPEGCDK	VRQRSDLKVIVMSAT
GTMDTESKKDPEGCD	SATLDAGKFQIYFDN
TKSNAGMKHGTMDTE	EEIDEACKRIKREVD
SPDTILQKDTRLYFL	DEACKRIKREVDDLG
IKGRFQQKQIENVLR	GPEVGDIKIIPLYST
RAALAVLKSGNPRGL	IFEPPPPKKQNGAIG
PPWKANSKQPAFTIH	FEPPPPKKQNGAIGR
DRAMRLVKDVFISAA	QNGAIGRKVVVSTNI
ATALGDKKSLEGDLE	VIDPGFAKQKVYNPR
ARITSWPKENPGSWF	DPGFAKQKVYNPRIR
TCVFPDKKSEGARIT	AGRTRPGKCFRLYTE
EEDEADPKRQKTENG	GSVVLQLKKLGIDDL
MREDYSDKVKASHWS	SVVLQLKKLGIDDLV
NASKFAQKIGGSERC	PLDPQLAKMVIASCD
TTNPNASKFAQKIGG	KKAADEAKMRFAHID
KDQEFTVKSKGAGGQ	LNVYHAFKQNHESVQ
YSVSYLLKDKGEYTL	DYYINIRKALVTGYF
AEFTVDAKHGGKAPL	TGHYLTVKDNQVVQL
VKETADFKVYTKGAG	PSTVLDHKPEWVLYN
ADFKVYTKGAGSGEL	NEFVLTTKNYIRTCT
GEHLVHVKKNGQHVA	IKPEWLVKIAPQYYD
SPSLDLSKIKVSGLG	NFPQCEAKRQLDRII
HIGGSPFKAKVTGPR	QLDRIIAKLQSKEYS
TRHQVHEKEEFKALK	ESIVCLQKALNHLRE
RTIDNMGKEIPTDAP	LQRTEVVKKHIKELL
VPPVSFLKVLKLNKT	EVVKKHIKELLDMMI
YDFDRFSKHDIIGEF	KSISVCQKELNTLCS
PCIFFEPKILYRAAA	TQVELMRKQKKERKQ
FKWTNYIKGYQRRWF	RKQKKERKQELKLLQ
RDLINLAKKRTNIIP	KERKQELKLLQEQDQ
GYPGDYTKGVEITGF	VTTLRETKASRREEF
RKNHLEGKAAISNKI	REEFVSIKRQIILCM
EGLQMVKKNFEWVAE	LRQLEMQKSQNEAVC
SDLGHCEKIKKACGN	ATIMSGSKAKVRKAL
EEGEQFVKKIGGIFA	GSKAKVRKALQLEVD
FKANLVFKEIEKKLE	VDRLEELKMQNMKKV
TKIEHFAKIGWKNHK	DAEIVRLKNYYEVHK
VKDGPGGKEATWVVD	ELFEGVQKWEETWRL
SKGSLGIKFSDRTIP	LFLEFERKASDPNRF
KQFLDYFKTEHKLEI	GNLLKEEKQRAKLQK
NQYLTDPKFVERTLR	KEEKQRAKLQKMLPK
DDHDPVDKIVLQKYH	LWEQEHSKAFMVNGQ
VDKIVLQKYHTINGH	AFMVNGQKFMEYVAE
WRKAFGEKTIVPWKS	QERQLKNKKQTETEM
VCQPWRWKSGAAAAA	ERQLKNKKQTETEML
FAKKAVEKPPQTEHI	SAPRTPSKRRGLAPN
QKNPMYQKERETPPR	LAPNTPGKARKLNTT
FYMGLYQKRDRTQQY	NTPGKARKLNTTTMS
KKIWMFDKYGLLVKG	RLPPSGSKPVAASTC
FLRKYREKYCTFNDD	ASTCSGKKTPRTGRH
IFLTDTAKQIKTKVN	RELSKASKSDATSGI
TQNVLGEKGRRIREL	EKRYVELKKANPDLP
NRKKTIDKILKCKLN	KRYVELKKANPDLPI
AKLEAEGKIPKERRK	IIEQRSLKWIFVGGK
VAEAHLGKLNVKLTK	GGKGGVGKTTCSCSL
DPYATFVKMLPDKDC	ISDAFDQKFSKVPTK
KKKLTGIKHELQANC	AFDQKFSKVPTKVKG
YDATYETKESKKEDL	SKVPTKVKGYDNLFA
ESAPLKSKMIYASSK	DNMLSMGKKMMQEAM
ANCYEEVKDRCTLAE	NMLSMGKKMMQEAMS
AVSDGVIKVFNDMKV	AEVMRLVKGMNFSVV
PEENPASKFSSASKY	LGRLMQIKNQISPFI
RSAPEPKKPEENPAS	RSVSEQFKDPEQTTF
YEGQNLAKILKDLEM	IQELAKCKIDTHNII
PASSFTPKQRSKARS	LVFPDPEKPCKMCEA
RKMSNKSKKSKKGAE	PDPEKPCKMCEARHK
VNRPLTMKKEGIQTR	YEDFHIVKLPLLPHE
NRPLIKPKRRLSAAR	AEETGEEKQDTQEKE
FTPKQRSKARSCSEG	EKQDTQEKEGILPER
RPASVYTKRCSEAFV	KYPSLGQKPGGSDFL
RRYLSAQKPLLNDGQ	SGDYNMAKAKMKNKQ
QMMVECSKYHGQLTK	DYNMAKAKMKNKQLP
KYHGQLTKEAAMGQG	LPSAGPDKNLVTGDH
RCFHQLMKDTTLNWK	PQDLPQRKSSLVTSK
QERVMFDKITSRIQK	DEADEAGKRIFGPRV
LRWYNHIKSYEKEKA	GNELCEVKHVLDLCR
VPVGYGIKKLQIQCV	SQTEHSYKELMAQNQ
HMINWVEKHVVQSIS	LMAQNQPKLSLPIRL
SISTQQEKETIAKCI	PIRLLPEKDDAGLPP
IEKAGIPKEEVKEAY	SYLDPLVKQAFQATA
GLTDVYNKIHMGSCA	VIINLSRKSDTQNLL
SCAENTAKKLNIARN	IPPQVPVKRKYLFTF
STPYGGVKLEDLIVK	PQVPVKRKYLFTFQG
GQPDVVVKEDEEYKR	LFTFQGEKIESLRSS
KLEDLIVKDGLTDVY	VLVEFTCKNQPKPSL
MVSAAFMKKYIHVAK	EAALVVPKPRVTEVH
GVRGYLDKLEPSKIT	EIPHRSGKAAGTDPN
EYFRDNGKHALIIYD	VVVWNSPKLPSEDLL
LEPSKITKFENAFLS	IMVVRTEKNSLNNRF
FNDGSDEKKKLYCIY	TGAAFFHKYYAYLYS
STVAQLVKRLTDADA	ITRKPPIKVTSRWTF
GKNYVNGKTFLEKRY	SHFHERHKCINFFVK
VLVHRARKLAQQYYL	KCINFFVKVYGYMPL
VEKLVLSKLYEEGSN	RVDSVLFKTRLPHDK
YIVHDEVKDKAFELE	KTRLPHDKTKCFKFI
GRHEIVPKDIREEAE	GAAKRARKEELTGVR
AYTQFGGKRPFGVSL	ELTGVRFKAQLKDPQ
QLFDQVVKTIGLREV	VRFKAQLKDPQGPGP
TWLKLNKKVTAQDVR	EAFVSAAKKLPREDV
GVNYFSIKNKKGSEL	AFVSAAKKLPREDVY
TEEEKNFKAFASLRM	DVVEGYIKISVECVE
VLKPHFHKDWQRRVA	FQLLSGEKRPESETM
VMVSTFHKYSGKEGD	VVGTNIVKKLMNNHM
KGKSEAGKKGPGRPT	VGTNIVKKLMNNHMK
MKNYVPPKGDKKGKK	KLMNNHMKLICESLY
DPNKPRGKMSSYAFF	CSHFDLNKKTLYTLV
VNFAEFSKKCSERWK	SHFDLNKKTLYTLVT
CREEHKKKHPDSSVN	LVTKRDSKGVYDVRQ
MSAKEKSKFEDMAKS	IVQVLEVKEFIPCIF
KCRILNEKVNTPTTT	LLSTLKTKVVHNKNI
VWKWKEEKGDRIYHQ	VHNKNITKTQKVRFF
LQEVWKWKEEKGDRI	KNITKTQKVRFFTGQ
GLLDAYLKTRTFLVG	DVNPENVKVSAEEAG
SKAYGASKTFGKAAG	MDLCCSLKHGINFYD
IPRWDLSKFLRVSTK	LHFLLGLKTAADDDL
RIMHNYDKLKSRISE	DLVVNILKVCPDLLN
VVNRVFDKLSPLHER	DLLNKYFKEVTFSFI
VVRNISYKYREDLSA	FSFIPRAKSTWLNNI
LYSQFLGKQPWFLGD	STWLNNIKLLNKIYE
KMTITEQKYEGEYRY	TVPLVCNKSMFTQAL
TELMQVLKDLNHGKY	VILKRALKTVDHCLN
GQSVLNIKYKNDFSP	TVDHCLNKEVWQESG
QGIKTNAKKDGSDWI	VWVWQSLKKQETKQD
HPFSQVLKEAKKPMV	QETKQDDKKGQKRSD
ERERAEKKKRATKTP	ETKQDDKKGQKRSDG
TIVRRRAKGAMGLEH	QDDKKGQKRSDGPPA
RFAEIIEKNLKSASS	QVICLYQKVVPHVVM
RSVLNNLKGDKFIKC	QYNFDFSKLLKGVIS
HGGSSGSKQNSDHSN	FDFSKLLKGVISEQG
LVTATDQKVEKMLIS	TSSHLQLKSLTKLLI
LGQSSPEKKIRIENG	LTKLLIMKILRDTGV
YTGKYFDKASYRVYC	MLQATMTKQEADDMS
DKESWHGKPLPKNMA	LLLQAYDKLEPPCLV
QPTAIIAKTFKGRGI	AITQSVLKELQNRRA
CKAFGQAKHQPTAII	GPATSPPKTPPQLEA
HQMDIYQKRCEAFGW	LVTQQPTKSPGKERH
GITGVEDKESWHGKP	QPTKSPGKERHLNAL
GKPAELLKMFGIDRD	RHLNALGKTLVQLLT
YHKPDQQKLQALKDT	AVIPVLRKTLWRQLQ
NERHKIVKEIHEQLK	TLLESCVKWLIVSFS
NIIRTFLKENCFRQS	VDPGDWQKFVKKGLK
VYVYPDDKYKETLQL	GDWQKFVKKGLKFRY
VEQAEALKAKGVQVV	YQDHTFLKMLLTAVQ
AKATGDWKGLRITVK	PESSVRTKLIQLPVV
SASALIIKALKEPPR	ESPDSQVKEALVDLM
CYSSKFLKHWDHLTQ	LRAYEQNKLSLINFR
TVAYTEQKMTSGKIK	PAAVEHHKTCRSLGR
LKADVVPKTAENFRA	TLALFIAKAALQILK
ELKHFEAKIEKHNHY	KAALQILKPEEHMYL
GSSAMPYKRNPMRSE	PEEHMYLKVSNFLLS
NWKDKFMKEATTNAP	HEYLNMDKVPGFYQF
KTINQWVKGQTEGKI	LRQGIRDKQCYELCA
QQGPQVDKEQFERVL	ILHILESKFLETPLL
EKLKKSLKEFYGEDA	WVTNLGDKAVEWESQ
SVFYRSYKEQESKKG	PSSQEPAKRLALHLV
SYKEQESKKGFDQEE	YVLIVLMKHLRPTLA
SKLYGDLKHLKTFDR	DVLVLLHKWSLIERD
EGCGKISKLYGDLKH	DLRAAIEKAQARELM
IDEYDYSKPIQGQQK	PVMPARAKGPRGRKR
RAAVDYQKVVREAVK	AKGPRGRKRRPGEAE
AERAALAKALKMTDA	ASTLETCKGLLRSIL
MSLDEIEKLTYIDKW	AGLIGWLKSHILPHP
KKRELYDKGGEQAIK	SLSSLSEKDEATQAS
YFRKQYSKGVSQMPL	FLVSLYIKDIWLGAQ
EALTILSKKKNGNYC	LDAGLPQKVAEKLDE
GPRSTIEKKGSRVTF	ERAIEALKEFNEDGA
NSTKTVKKIKVSVRQ	LAVLQQFKDSDLSHV
TKTVKKIKVSVRQYA	KTYRQREKQGTKVAD
RHYRVLGKGGFGEVC	QREKQGTKVADSSKG
IRNFLGEKYIRRVRM	TKVADSSKGPDEAKI
FVATGHGKYEKVLVE	GPDEAKIKALLERTG
PRSGLAAKHFIDVGA	DVTTGQRKYGGPPPD
SRLAHYNKRSTITSR	ELVPLFEKAGPIWDL
EHIKSFDKNLYRQLI	AFVTFCTKEAAQEAV
VSEHSIIKDFTKQKY	NHEIRSGKHIGVCIS
QLLKFVEKCSPIGVY	SIPKSKTKEQILEEF
KVIPSPFKHADIVTT	LYHQPDDKKKNRGFC
FFESMPYKLNPKTGL	YHQPDDKKKNRGFCF
YSEGYPGKRYYGGAE	HQPDDKKKNRGFCFL
IFYRKGVKAVDPKTG	FLEYEDHKTAAQARR
DFKSFLLKDSETSQR	RLMSGKVKVWGNVGT
EYSLQVLKNARAMAD	PDPEVMAKVKVLFVR
HGYMSDVKRISATSI	PEVMAKVKVLFVRNL
LLNDAFQKGGPEGAT	FGKLERVKKLKDYAF
VDKLAELKNLGQPIK	NIEIVFAKPPDQKRK
ALKPEVDKLNIMAAK	FAKPPDQKRKERKAQ
GIQYKALKPEVDKLN	KPPDQKRKERKAQRQ
MAMEPDRKAAVSHWQ	DQKRKERKAQRQAAK
WTTSRVLKVLSVCSS	KAQRQAAKNQMYDDY
VIKPIDKKAPDFVFY	GNVGGKRKADGYNQP
RNISFNDKKFVIKPI	HSGNYGYKSENQEFY
KENPLQFKFRAKFFP	GERKNNNKRWYFTRE
GNIFRVCKTFQMAEY	AKVEEQPKKLEHVIK
RTMEIYSKTTRFALA	KKLEHVIKVAHTCLH
TLRAAASKLEQGKRV	HPHTHVVKCTQLVRA
EGILRRLKKYDNCWL	TQLVRASKDLAQTSY
GILRRLKKYDNCWLA	VCIHLACKWSNWEIP
EYYENEKKWRHKSSA	IPVSTDGKHWWEYVD
RHKSSAPKRSIPLES	EKTPNRLKRIWNWRA
EKVAAYDKLEKTKTR	DDRGTDEKTSEQTIL
LSQRHEEKVAAYDKL	LSSQPSFKLEPTQGH
SLAKLKNKHEAMITD	ISQKQNSKSVPSAKV
VNKDDIQKMNPPKFS	SKSVPSAKVSLKEYR
RNCAAYLKLRNWQWW	SLKEYRAKHAEELAA
VRTELADKVTKLQVE	ENMEANVKSQYAYAA
TDKTFVEKLVQEQGS	SHSSVILKMPIEGSE
KARDEVIKQLRKLQA	PFLEKADKTALKMRI
WLVHRINKALDRTKR	IPVAGGDKAASSKPE
NGKIIWAKHSEVQQA	GDKAASSKPEEIKMR
ASKNDDKKKDAKKIT	SSKPEEIKMRIKVHA
NDSRNLKKASKNDDK	EEIKMRIKVHAAADK
GDHTEVLKGIQKFPG	REHKEKHKTHPSNHH
PKYIINVKQFAKFVV	HHNHHSHKHSHSQLP
KVIKSYAKFSATPRY	LPVGTGNKRPGDPKH
FRSVISYKTEEKPIF	NKRPGDPKHSSQTSN
DQFLVAFKEVGRKPP	QTSNLAHKTYSLSSS
MKMVAAAKYARAERE	AVFDHPAKIAKSTKS
GRMFAPTKTWRRWHR	DHPAKIAKSTKSSSL
LKLNPYAKTMRRNTI	AKIAKSTKSSSLNFS
ILKDHWQKYGRNFFT	SFSQPSCKTRVPHSK
GVVGPYVKKILCEEL	VPHSKLDKGPTGANG
TQAYQDQKPGTSGLR	RDPVNPEKLLVITVA
LSGPNRLKIRIDAMH	GQKVRWLKKEMEKYA
CKRRYNIKLWKTFTD	QKVRWLKKEMEKYAD
SAQSRGEKRTAHNAI	YPEVGTGKRFLNSGG
TAHNAIEKRYRSSIN	HQIVRQWKYKDDDDD
RHKEAFLKKHNLKLG	IVRQWKYKDDDDDQL
SMHEFSAKDIDGHMV	LDPGLREKLSLNLDH
VLQMDITKPVQIKDA	LSLNLDHKSRIFQNL
EVQQKIEKQYDADLE	ALDEVVLKFDRNRVR
AQASDLEKIHLDEKS	VHGNGPTKLQLNYLG
ELLQDNAKLVPVLSA	QDHFSAVKLVGPEEA
KFAADAVKLERMLTE	ILIEENRKVIAPMLS
PLKDGEAKIKSDYAQ	PMLSRHGKLWSNFWG
HMGDILYKLSSMKFK	YVELVQRKRVGVWNV
NMVKNAEKYAEEDRR	DPDMAFCKSFRDKGI
IIHDTETKMEEFKDQ	FCKSFRDKGIFLHLS
ALLRHIVKEFKRETG	FDNPVDWKEQYIHEN
ETGVDLTKDNMALQR	PTVDIHMKQVGYEDQ
YDDPEVQKDIKNVPF	LFPGYHTKARAVMNF
IYAYGFEKPSAIQQR	LNVALNHKGLDYEGG
AGVGSMTKIYGGRQR	CVISSPRKGWALLHP
LQALEGLKMVEKDQD	SAAYASTKESYPHIK
KFIDTTSKFGHGRFQ	KESYPHIKTVCDAAE
NLSGNKIKDLSTIEP	YAHRGLDKLEENLPI
RMMENGIKPVYVFDG	TKELVSSKVSGAQEM
VRRLDPNKYPVPENW	QEMVSSAKDTVATQL
TGSLSSAKRKEPEPK	QSGVDKTKSVVTGGV
AVKTLNPKAEVARAQ	AYEHSLGKLRATKQR
EKFTFIEKCNNPRSV	LSLMETVKQGVDQKL
EIMEMKHKSETDTSL	VKQGVDQKLVEGQEK
KHTLTQIKDAVRDGL	KLVEGQEKLHQMWLS
RSVTLLIKGPNKHTL	KQLQGPEKEPPKPEQ
SAESQILKHLLKNLF	GPEKEPPKPEQVESR
NVEKKIDKYTEVLKT	QGLPTNVKDQVQQAR
DWAYAASKESHATLV	PIYEPGLKEVVESCR
TGDSGSGKPFKIKGQ	VVESCRGKNLFFSTN
MERKDLLKANVKIFK	TNIDDAIKEADLVFI
VIKNKTWKFVEGLPI	ISVNTPTKTYGMGKG
NTFVAELKGLDPARV	VQNSNGYKIVTEKST
KVSSFEEKMISDAIP	GYKIVTEKSTVPVRA
HGVYNPNKIFGVTTL	RIFDANTKPNLNLQV
LGKKGIEKNLGIGKV	EHWVPREKILTTNTW
LGRLDYHKEQAAQLR	FGGSCFQKDVLNLVY
GYLCESQKFGELVMT	LFNTVTDKKIAILGF
KGLKTILKDATLTAL	FNTVTDKKIAILGFA
RGQQQVFKGLNDKVK	AILGFAFKKDTGDTR
GLYPAPLKIIDVVKT	ILGFAFKKDTGDTRE
NKFGAPQKDVKHLAI	SSSIYISKYLMDEGA
GKVIIVVKDGPGFYT	HLHIYDPKVPREQIV
KVEPASEKDPESLRQ	CTEWDMFKELDYERI
QEQIIQVKELSKGVE	LDYERIHKKMLKPAF
ICRVPKSKLEVGRII	DYERIHKKMLKPAFI
KFADFMVKDVKNGEC	FQIETIGKKVSSKRI
YDKKKLVKAFKKKFA	QIETIGKKVSSKRIP
ADDYDKKKLVKAFKK	IGKKVSSKRIPYAPS
NFVSFISKDSIQKSL	APSGEIPKFSLQDPP
EFRHLQLKEQKNAGT	TEAETIQKLCDRVAS
GEDGFLLKIKLGHYA	QFTEIFIKQQENVTL
IKALSNQKYREMYEE	KLLTSLLKQLGPQVQ
SNVFKIVKMIMERNF	NSNQNFFKEGSYIQR
SVRLYIPKDLRPVDN	GSYIQRMKPWFEVGD
VLICRIVKGYTLADE	NSGWSAQKVTNLHLM
EVIDSIIKEKTVVYG	GATSSCQKAMFQCGL
RETFRNLKYEVRNKN	CFQCFLYKNQKGQGE
SPTDFLAKMEEANIQ	CFLYKNQKGQGEIVS
RIWDTLQKLGAVYDV	LQENATQKEQLLRVQ
RIHDVLCKLVEKGET	GKENFIEKLGFISKH
SAVLDTGKYVGLVRV	EKLGFISKHELYSRA
KYAGLLEKKWTSVIR	LYSRASQKPQPNFPS
KAYNTLIKDKVNRDS	ELEGVITKAIYKSSE
NHRNSWAKAYNTLIK	VITKAIYKSSEEDKK
GQGRIILKASRHACV	DNIVTHYKNMIREQD
GVKFTNSKLTSLNEE	RQQVSTLKCQNEQLQ
CYYSLASKVEGPPGS	KDQYNLLKIQLGKDN
LNAENAQKFKTKFEE	LLKIQLGKDNQHQGS
AENAQKFKTKFEECR	LQSQLTEKDSMIENM
ITPMMELKPNAGSDR	DSMIENMKSSQTSGT
NRYIVLAKDFEKAYK	QKTEAFAKSVEVQGE
SKHAFSLKQLDNPAR	TETIIATKTTDVEGR
MLVIDASKRISVDEA	SEERTAIKEQLDSSN
TPSAEFMKKLQPTVR	LLADQDQKILSLKNK
LQTQDHAKAPKSEKG	KILSLKNKLKDLGHP
KRTPSVGKAMDTPKP	LSLKNKLKDLGHPVE
PNHYQVVKDGLNQKP	AEVIILPKKHKKKKE
LVHMGLLKSEDKVKA	FLIKPESKVAKLDTS
LIYVTPEKIAKSKMF	KPESKVAKLDTSQWP
MFMSRLEKAYEARRF	ACGSNPLKREIGDYI
NEKLTPLKLIDSWMG	TGFINLDKPSNPSSH
GLSDIAEKFLKKDQS	RRILRVEKTGHSGTL
SVSIPSEKQRLIYQG	HSGTLDPKVTGCLIV
KNKYNTPKYRMIVRV	ERATRLVKSQQSAGK
RHMIRKNKYRPDLRM	PPLIAAVKRQLRVRT
IVRLDSQKHIDFSLR	VRTIYESKMIEYDPE
DELINAAKGSSNSYA	RSGVMSEKDHMVTMH
LEGLEKLKHLDFLKQ	QWLYDNHKDESYLRR
STPLGCYKKLIEYYK	EKLLTSHKRLVMKDS
KNGDLSFKYVKTFNM	NAICYGAKIMLPGVL
HGDLGNGKFLDPKNR	EIVVITTKGEAICMA
FDDTNPEKEEAKFFT	CDHGIVAKIKRVIME
FIERTDFKEEPEPGF	HGIVAKIKRVIMERD
LSQGQVLKLEAKTDP	ERDTYPRKWGLGPKA
LRVAQILKEPKVAAS	RKWGLGPKASQKKLM
SELKTVLKSFLSQGQ	LGPKASQKKLMIKQG
WVTIKFMKVDGAKEL	SQKKLMIKQGLLDKH
IQVLRVVKNFEHLNS	GLLDKHGKPTDSTPA
ENMPSHFKFKEYCPM	DSTPATWKQEYVDYS
MLRISDDKYGRIRLH	VDYSESAKKEVVAEV
IIETDKPKVAPAPAR	DYSESAKKEVVAEVV
VPIDLSCKHRTEKSE	EVVAEVVKAPQVVAE
LNLFDTYKGKSLEIQ	QVVAEAAKTAKRKRE
KMIIEEAKRSLHDAL	AEAAKTAKRKRESES
GGRLEDTKLIKGVIV	PAAPQLIKKEKKKSK
IFQEIFDKHYKTDFD	VEYVVGRKNCAILIE
FKLKKMWKSPNGTIR	EIPVLTLKDNSKYGT
DSALATQKYSVAVKC	LTLKDNSKYGTFVNE
KAYDGRFKDIFQEIF	NGFSRTLKSGDGITF
PHVDIQLKYFDLGLP	TFGVFGSKFRIEYEP
STKNTILKAYDGRFK	SCLDVSGKTALNQAI
RLVPGWTKPITIGRH	HLVMVSVKVTIKTIC
EIFDKHYKTDFDKNK	VSVKVTIKTICALIC
HAHGDQYKATDFVAD	ICGRPIVKPEYFTEF
RIIWQFIKEKLILPH	LKAVESKKQPPQIES
FREPIICKNIPRLVP	QERKQIFKGKTFIFL
KTDFDKNKIWYEHRL	FLNAKQHKKLSSAVV
MSADAMLKALLGSKH	LNAKQHKKLSSAVVF
SKQQDSDKLNSLSVP	TLIPDCQKKWIQSIM
LSVPSVSKRVVLGDS	LIPDCQKKWIQSIMD
GTRVFVQKEILDKFT	AVIFMTTKNYCDPQG
APSTSADKVESLDVD	QGVSVDEKLMPSAPV
SFFGVHPKQAHTMDP	SERPKEIKVSKMEQK
FQDVCKPKYSGTLNL	PKEIKVSKMEQKFRM
TTVGSAEKRAYLQAR	KVSKMEQKFRMLSQD
GRFLEIGKFDLSQNH	SQDAPTVKESCKTSS
EAHGTGTKVGDPQEL	PTVKESCKTSSNNNS
LRSDEAVKPFGLKVS	MVSNTLAKMRIPNYQ
RKEGVFAKEVRTGGM	LPSINKSKDRASQQQ
LNSLAEEKLQASVRC	NYFQPSTKKRERDEE
IRTCLGPKSMMKMLL	NQEMSSCKSARIETS
LDSSLEYKKGESQTD	PATPSLWKNKEQHLS
SGNINAAKTIADIIR	LFTDTDLKSIVKNSA
LRGVMINKDVTHPRM	TDLKSIVKNSASKSH
LAEGGGAKFKKYEEI	IVKNSASKSHAAEKL
RQPMILEKGQRFTLR	AEKLRSNKKREMDDV
IFAKNVQKRLNRAQE	EKLRSNKKREMDDVA
DLVCLVYKTDQAQDV	EIDVKVQKQEEDVNV
MKARVVLKYRHSDGN	EEDVNVRKRPRMDIE
KALNEALKLFKMHSP	EAVPESSKISQENEI
QRFIDFFKRNEHTYV	SQENEIGKKRELKED
IKAEMLYKNNPKLLT	IGKKRELKEDSLWSA
QKNVQLYKMRNGYEL	KEISNNDKLQDDSEM
SHGHNVFKERISDMC	DDSEMLPKKLLLTEF
GEVGSGFKVAMHILN	DSEMLPKKLLLTEFR
AVPSPCGKYYTLNGS	LKNFKKFKKVTYPGA
RASLRDEKGALFQAH	QVERGVSKIIGGDPK
ILLREGCKKILVADS	KIIGGDPKGNNFLYT
IRKEIPAKIIFEDDR	NFLYTNGKCVILRNI
GGDTIFGKIIRKEIP	AHQVVVAKYAPSGFY
SGTGFGDKFKPVIGT	ASGDVSGKLRIWDTT
TNRSVYFKPSLTPSG	VVGEGREKFGAVFLW
SEGFKFSKPIGDFKF	GEITGHNKVINSVDI
DVTDGRAKYWLERAA	VINSVDIKQSRPYRL
ARFCAEIKSPKYGEG	QIYIYDGKTGEKVCA
LLLPGVIKTVYNLND	LLSASGDKTSKIWDV
PKCPKCNKEVYFAER	QLGCLWQKDHLLSVS
TEGSFVYKGGKIYKV	SKPLHVIKGHSKSIQ
PIQKMFEKLGITTIK	IQCLTVHKNGGKSYI
PTNVRKRKFINRDLA	TVHKNGGKSYIYSGS
FKFSYGEKCLYNVSA	ENDSFAGKGHTNQVS
KATQVGEKTPKDESA	VKLDVQPKCVAVGPG
TEQRNVYKDLRQIEL	EGKLLEAKGPVTDVA
RHVVMELKEKAVIFI	LAVCDASKVVTVFSV
TGQKVALKKVLMENE	VFYGHHAKIVCLAWS
EEDPNFKKIDPKILA	SDPETRVKIQDAHRL
QMLKEGAKHFSGLEE	TGGLAGSKGADPPEF
KANEVISKLYAVHQE	SLRMTVVKRQAQSPS
LALHFLNKMKIMVIK	VEVLKALKSLFEHHK
CNVLLIQKSILRDAL	HHKALDEKVRERLRV
KMKIMVIKDIEREDI	QNVHIQRKMASSEGS
NRHAQGEKTAGINVR	EGMEPGQKVHEKRLS
EYKRMYGKSLYHDIS	PGQKVHEKRLSNGSI
KVIGKNGKVIQEIVD	ELQELLEKQNYEMAQ
LLQSSYNKQRFDQPL	NYEMAQMKERLAALS
NQIKVQEKYVWNKRE	TARKDLIKTEEMNTK
SEKDKKGKGGAKTLM	KTEEMNTKYQRDIRE
GRDKGKGKKRPNRGK	IREAMAQKEDMEERI
VTHTETGKVLFGPEA	SIHDMNDKLENELAN
DGSEKDKKGKGGAKT	LENELANKEAILRQM
KHLDTFLKGKSGLRV	KLQQTMRKAETLPEV
YNLMIQNKDDLARII	QRARQREKMNEEHNK
AIKARFAKPVYPGQT	KMNEEHNKRLSDTVD
RAAWEHMKKQKYGRI	RSELDQLKMRTGSLI
EDTRLWAKNSEGSLD	QSDYRTTKVIRRPRR
ATLKHLDKAYEVEDG	GVRRDEPKVKSLGDH
HITEATLKHLDKAYE	RRDEPKVKSLGDHEW
KIFVGGIKEDTEEYN	PSGHSTPKLTPRSPA
GEEGHDPKEPEQLRK	TLPSDLRKHRRKIAV
SKGCGVVKFESPEVA	DLRKHRRKIAVVEED
FDRPMHVKMDERALP	EEDGREDKATIKCET
HRFKNKGKDSTEMRR	REDKATIKCETSPPP
RKGVKIDKTDYMVGS	IGRLFGKKEKARLGQ
DDDELDSKLNYKPPP	RLFGKKEKARLGQLR
ARGTYHNKSFFTDDD	QESLGLGKLGTQAEK
NYKPPPQKSLKELQE	LLEEARRKGLPFAQW
RDIVSGLKYVQHTYR	AACRANVKSGAIMSA
RRYIGIVKQAGLERM	SNPLHRLKLRLAIQE
HRYIEVFKSHRTEMD	ENLAAPAKTKESEEG
FRYKIQAKGKTPSLD	MLDHLTKKDLRVHLK
PHQTKEQKILQETLN	KDLRVHLKMVDSFHR
QRSGGSGKGSNKGPL	QYGIMCLKRLNYDRK
NILTSNQKTLTPEKG	EASQHEIKDVLVWSN
GSGKGSNKGPLGVTE	RLDESDDKNFRRGST
QKTLTPEKGQSQGLI	TTSGQSRKMTTDVAS
PQLQGFRKFNILTSN	LNLKQLRKRGSIPTS
SLDPHQTKEQKILQE	LSGRSTPKLTSRSAA
YKIQAKGKTPSLDPH	TLPSDLRKHRRKLLS
ANTNTVPKLYRSVIE	DLRKHRRKLLSPVSR
RKMAHISKYDRVVRR	REENREDKATIKCET
SASPPKAKNLNGGLR	REDKATIKCETSPPS
TLHQIFEKLTDNGTE	PRTLRLEKLGHPALS
KTAQQIAKDMERWAK	ALSQEEGKSALEDQG
EIYKQYFKSNFPARA	SSQDSLHKGAKRKGI
WQNPCDDKRHKDIWS	IGRLFGKKEKGRLIQ
VPRELLEKLIESRQA	RLFGKKEKGRLIQLS
EENCAILKELVTLRA	QEPMVPAKLGTQAEK
PHYFPLLKKCHVPET	SNALHRLKLRLAIQE
CKDAGLAKSIGVSNF	ETLETSTKTDSEEGS
RKLLDFCKSKDIVLV	EESQHEIKDVLVWTN
YAPAEVPKSKALEAV	LALGTDRKLDDGDDK
PRNKISFKFDHLRKE	KLDDGDDKVFRRAPS
EKVRIAAKFITHAPP	RRAPSWRKRFRPREH
RTKIDWNKILSYKIG	PPPAPPKKIMPEAHS
SIKKLVLKNLNNSNL	AEDAPWKKIQQNTFT
VNKNIFLKDQNIFVQ	EHLKCVNKRIGNLQT
DQTSPNPKYRGFFHG	LLEVLSQKRMYRKYH
MQGLEAHKYRNTWDC	FLDRESIKLVSIDSK
TQANDYFKAKDYENA	KLVSIDSKAIVDGNL
IGHYLDQKRLKQGLY	AIVDGNLKLILGLVW
IPMEFVNKMKKEGKL	EGDDDAKKQTPKQRL
MGIGHRVKSINNPDM	LLGWIQNKIPYLPIT
EILIPVFKNMADAMR	NQNWQDGKALGALVD
DGVKSWLKPRLGQEA	WESWDPQKPVDNARE
NKMKKEGKLIMGIGH	TYLSQFPKAKLKPGA
QKNDGKEKEHELHLD	LKPGAPLKPKLNPKK
DNMFQIGKMRYVSVR	LKPKLNPKKARAYGR
SFNRHNLKYYVLPKK	NMVKQPAKFTVDTIS
NIYLQLSKKDPIIKL	QVTPDSDKNKTYSVE
FSSPNIAKEMHVGHL	TPDSDKNKTYSVEYL
FDTEEEFKKRAYQCV	FAGQHISKSPFEVSV
QDIIYRMKHQFGNEI	PFEVSVDKAQGDASK
QLPMYLSKEDIQDII	KAQGDASKVTAKGPG
VFVKGYEKGQPDEEL	AVGNIANKPTYFDIY
KHVLFPLKSEFVILR	VELLVEDKGNQVYRC
GQPDEELKPKKKVFE	QVYRCVYKPMQPGPH
PKKKVFEKLQADFKI	QPGPHVVKIFFAGDT
VVTQHDSKKAGAEVV	FAGDTIPKSPFVVQV
LPALGYSKRVHLMNP	WGGHHIPKSPFEVQV
KNNCLELKKKNHKEE	GPEAGMQKVRAWGPG
TRDLQGGKAFGLLKA	IEGPSQAKIEYNDQN
KIVAKNNKNMAFKLK	NDGSCDVKYWPKEPG
FWGKIVAKNNKNMAF	CDVKYWPKEPGEYAV
MFGMVLEKIIIPEIQ	MCDDEDIKDSPYMAF
RTAHSLFKRYRHEFK	QRIDIQMKNRMDGTY
SENEYIMKAIMRSFS	ACSYTPVKAIKHTIA
GKYKFLQKYYHRGAF	YTPVKAIKHTIAVVW
LLSGTSYKDLMPHDL	GSHPQKVKVFGPGVE
KLMLDLNKAKSMGQR	GVERSGLKANEPTHF
DEEKEDPKGIPEFWL	AAGRYTIKVLFASQE
EHDEPILKHLKDIKV	SHDASKVKAEGPGLS
IPEKQPFKDLGNLRY	VYTKGAGKAPLNVQF
KLKNVIHKIFSKFGK	PLPGDAVKDLDIIDN
IALWGGEKFKQIQRF	PLDLSKIKLNGLENR
FKWSHDGKFFARMTL	RGAGGQGKLDVTILS
VIHKIFSKFGKITND	TILSPSRKVVPCLVT
IQVNEPWKRIKGSEA	GRENSTAKFIPREEG
LVDKHKVKRQRLDRI	PPDPSKVKAHGPGLE
AAIQAHYKSAHLDHR	LEGGLVGKPAEFTID
KHQINIEKYQRCRIW	SVSYLPTKPGEYFVN
SLLGPSSKFRHAQGT	EMPFDPSKVVASGPG
EVKDYVAKGEDVNRT	GPGLEHGKVGEAGLL
KGADKTVKGPDGLTA	AVSDSGTKAEVSIQN
IEKILCHKFMRFMMM	GMYTLTMKYGGELVP
LVGGASLKPEFVDII	FGPGIEGKDVFREAT
EKLRGWLKSNVSDAV	QVGGDHIKAHIANPS
FFVGGNWKMNGRKQS	VEYTPFEKGLHVVEV
QAQEVHEKLRGWLKS	QAQGPGLKEAFTNKP
MEDLTRLKETIDNNS	LKEAFTNKPNVFTVV
AIHCKAGKGRTGVMI	KINCRDNKDGSCSAE
HVAAIHCKAGKGRTG	KDVVDPSKVKIAGPG
ESAKIRAKYPDRVPV	VVDPSKVKIAGPGLG
LQTVAKNKDQGTYED	SFTVDSSKAGLAPLE
MHGDMDQKERDVIMR	GPYMVSVKYADEEIP
EMLSRGFKDQIYDIF	QITDQEGKPKRAIVH
NRRYLSPKYIKMFVL	TDQEGKPKRAIVHDN
ELAQQIQKVVMALGD	RAIVHDNKDGTYAVT
KVDWLTEKMHARDFT	AVTYIPDKTGRYMIG
VDFALIHKERKKANE	PGIASTVKTGEEVGF
RYEAANWKYKYGYEI	VDAKTAGKGKVTCTV
EAANWKYKYGYEIPV	DIFYTAAKPGTYVIY
GDKGYLTKEDLRVLM	VIPFAVRKGEITGEV
DLRVLMEKEFPGFLE	EVHMPSGKTATPEIV
LAVDKIMKDLDQCRD	GLHEMHIKYMGSHIP
FHKFAGDKGYLTKED	LVYGVANKTATFTIV
KLAKNKQKPITPETA	LAIEGPSKAEISCID
ITPETAEKLARDLKA	EISCIDNKDGTCTVT
VTITDPFKHFVGMLP	GDYSILVKYNDKHIP
CRIFYDMKVRKCSTP	ILVKYNDKHIPGSPF
QRIKREFKEVLKSEE	PGSPFTAKITDDSRR
RICLDILKDKWSPAL	SRRCSQVKLGSAADF
CLDILKDKWSPALQI	IGDARRAKVYGRGLS
IYHPNVDKLGRICLD	LAVEGPSKVDIQTED
TDGSKWIKQYTGINA	DLEDGTCKVSYFPTV
KYDTDGSKWIKQYTG	ISGEGRVKESITRTS
YVCPDLVKEFNKYDT	SICDLNLKIPEINSS
DTRSEFYKHIVLSGG	AEIVPMGKNSHCVRF
SRLERELKQLYLERV	LGEGGAHKVRAGGPG
VKKMCMYKYPGMKKK	EITFDDHKNGSCGVS
IGKSTALKILAGKQK	GNYEVSIKFNDEHIP
QLDLTHLKERNVEDL	AIRLNGAKGKIDAKV
VRQLLHEKIRDAYTH	AKGKIDAKVHSPSGA
VGSILDRKDETKTQA	VTIEGPSKVKMDCQE
SRAQILDKATEYIQY	IEGPSKVKMDCQETP
TGDETGAKVERADGY	QETPEGYKVMYTPMA
KVVDPFSKKDWYDVK	GNYLISVKYGGPNHI
LFCVGFTKKRNNQIR	VGSPFKAKVTGQRLV
KKDWYDVKAPAMFNI	TCYSAIPKASSDASK
KLVSKIAKYPHVEDY	SKAFVGQKSSFLVDC
PDTQWITKPVHKHRE	GDYVLAVKWGEEHIP
PKGATYGKPVHHGVN	MNQVKLLKKDPGNEV
RYKTGKNKWFFQKLR	VEPGTDRKSTGFETL
GRKAVIVKNIDDGTS	KIMFNRPKKKNAINT
SVDIPLDKTVVNKDV	IMFNRPKKKNAINTE
IFKQFHFKDFNRAFG	HEIMRALKAASKDDS
VGSGSKGKGGEIQPV	PPGGVEEKAKNNAVL
TKVVLDDKDYFLFRD	GCFIDFPKPLIAVVN
VSVKVGDKVLLPEYG	CSSYTFPKIMSPAKA
KLDEQYQKYKFMELN	PKIMSPAKATEMLIF
EKPKEGVKTENNDHI	EMLIFGKKLTAGEAC
TPLSKLMKAYCERQG	FPDSTFQKEVWTRLK
KRHTPLSKLMKAYCE	KEVWTRLKAFAKLPP
ASDDKTLKIWDVSSG	TRLKAFAKLPPNALR
QQNNVEHKVETFSGV	PNALRISKEVIRKRE
PQLKSFQKIQVRLVR	SSDRRTGKPIAVKLV
VMTNLGEKLTDEEVD	AVKLVKIKQEILPEE
VGSELIQKYLGDGPK	VPHNLESKSPAAPGQ
EPVLLLGKERFAGVD	VQLETGDKINFVIDN
VRVDLPDKYPFKSPS	NFVIDNNKHTGAVSA
VSLLALYKGKKERPR	ARNIMLLKKKQARCQ
MQNPRQYKIPDWFLN	RNIMLLKKKQARCQG
QCFRQYAKDIGFIKL	NIMLLKKKQARCQGV
DVKEQIYKLAKKGLT	QGVVCAMKEAFGFIE
EDLYHLIKKAVAVRK	IERGDVVKEIFFHYS
RSVPTWLKLTSDDVK	FFHYSEFKGDLETLQ
KNIGLGFKTPKEAIE	DDVEFTIKDRNGKEV
VNGQLKNKYGDAFIR	HFEGTVTKVIPKVPS
TEEKFIVKATNGPRY	TVTKVIPKVPSKNQN
RKKLLEHKEIDGRLK	VIPKVPSKNQNDPLP
EDKGALAKLVEAIRT	DPLPGRIKVDFVIPK
QCCYNCGKPGHLARD	ISTDRRDKLERATNI
PKHWMLDKLTGVFAP	RNHAIRIKKLPKGTV
RITPEEAKYKLCKVR	AYDDCGVKLTIAFQA
RKIFVGTKGIPHLVT	LTIAFQAKDVEGSTS
VMVGMGQKDSYVGDE	TSPQIGDKVEFSISD
DNIQGITKPAIRRLA	VEFSISDKQRPGQQV
EETRGVLKVFLENVI	IETANHDKEIFFHYS
GLGKGGAKRHRKVLR	MVEYSLSKGKGNKVS
APAPKKGKKKAVTKA	EYSLSKGKGNKVSAE
KSNYNFEKPFLWLAR	LSKGKGNKVSAEKVN
VTSRVTYKNVPNWHR	GNKVSAEKVNKTHSV
HTNRGPIKFNVWDTA	VSAEKVNKTHSVNGI
HLTGEFEKKYVATLG	DPTIYSGKVIRPLRS
WDTAGQEKFGGLRDG	IVEEGDMKGEVYPFG
PGKATVPKTEIREKL	GIVGMANKGDCLQKG
KERKNRMKKVRGTAK	LQKGESVKFQLCVLG
ATYDKLCKEVPNYKL	NYEVGDSKKLFFHVK
CKEVPNYKLITPAVV	YEVGDSKKLFFHVKE
NNLVLFDKATYDKLC	KKLFFHVKEVQDGIE
FDAYVLPKLYVKLHY	ILNQRTGKCSACNVW
LNKAVWAKGIRNVPY	WRVCEGPKAVAAPRP
LVKKLAKKYDAFLAS	DRLVNRLKNITLDDA
GAKHRISKEEAMRWF	MGFGAERKIRQAGVI
GQTPVFSKARYTVRS	AYLQSLAKKICSHSA
GYIKGIVKDIIHDPG	YLQSLAKKICSHSAP
KTEWLDGKHVVFGKV	TAGPPKKKRKKTQKK
GKHVVFGKVKEGMNI	GPPKKKRKKTQKKFR
RALSTGEKGFGYKGS	KKRKKTQKKFRKREE
GKSIYGEKFEDENFI	EEKAAEHKAKSLGEK
GEKGFGYKGSCFHRI	LSPAALEKRRRRKQE
RHNGTGGKSIYGEKF	DRKKRKRKELRAKEK
SFELFADKVPKTAEN	RAKEKARKAEEATEA
LAVLKYYKVDENGKI	SEDEPASKAQRRKEK
SLRQLAQKYNCDKMI	ASKAQRRKEKRQRVK
ECDQNWYKAELNGKD	KAQRRKEKRQRVKGN
GKDGFIPKNYIEMKP	KWTNLLYKAEGVKIR
KGEIFELKAELNNEK	LYKAEGVKIRDDERL
ESKVFYLKMKGDYYR	LQEALKRKEKRRAQR
NASQAESKVFYLKMK	RTAGVVEKMQQRQDR
NLLSVAYKNVVGARR	RRQNLRRKKAARAER
VVSSIEQKTEGAEKK	RQNLRRKKAARAERR
KKEGEYIKLKVIGQD	KFINVGEKAYSCALK
LEKYNIEKDIAAHIK	SCALKSGKLVTAVSN
PRKIEEIKDFLLTAR	VFNGDGTKIAAGSSD
IVEMSTSKTGKHGHA	VMDSSQQKTFRGHDA
MQCSALRKNGFVVLK	LSLSFDPKDIFLASA
KKTETQEKNTLPTKE	ISWPLLQKCNDVINA
SLEAASEKYSEKEDK	CRLAWQPKSGKLLAI
KRGILTLKYPIEHGI	AWQPKSGKLLAIPVE
DLAEEYSKDRKKFCK	IPVEKSVKLYRRESW
NVKNVSVKDVRRGNV	IVWNVETKDCMERVK
KKLEDGPKFLKSGDA	KDCMERVKHEKGYAI
KRYEEIVKEVSTYIK	MERVKHEKGYAICGL
AWARLDHKFDLMYAK	SVDISMLKTGSSLLK
RLSVDYGKKSKLEFS	PMPTPRQKPFQSGST
KCDPRHGKYMACCLL	FSSWDSSKEWIIDLP
VPGGDLAKVQRAVCM	FTIGGVQKEVFSLAG
PATGGVKKPHRYRPG	LLELGKKKKQILHGD
RTKQTARKSTGGKAP	LELGKKKKQILHGDP
AVTALWGKVNVDEVG	DPLPLTRKSYLAWIG
NVKAAWGKVGAHAGE	CNTREHCKGKSDHYW
DIGTYQCKVKKAPGV	TREHCKGKSDHYWVV
HFTSNDLKSGDASIN	QLRCIPCKGSRFPPT
DDYYPDLKGRVHFTS	YCQIATEKGQMEEQF
RQERPPVKPFILTRN	NHLDYLAKNGYEYEE
YDRRFVIKTVSSEDV	YEYEESTKNQATKEQ
PSAELDKKANLLKCE	STKNQATKEQQELLM
LAPVNIFKAGADEER	EEEEDFRKKLNAGYS
HHKDHFTKLAVEAVL	EEEDFRKKLNAGYSN
DHGSDEVKFRQDLMN	EEKPEIHKPGQNSFS
GLKEEFRKEFTKLEE	PGQNSFSKSTNSSDV
EVININLKNKPEWFF	NSSDVSAKSGAVTFS
MILELFSKVPSLVGS	QGRVNPFKVSASSKE
NKPEWFFKKNPFGLV	FKVSASSKEPAMSMN
KEDYAGLKEEFRKEF	NILDNMGKSSKKSTA
ADWIQLEKIRAPSNV	SRTTNNEKSPIIKPL
SVGPDFGKKRLGLPG	LIPKPKPKQASAASY
RSPNLWLKDVLKEEG	SAASYFQKRNSQTNK
TCTSVYTKDRAAKCK	TNKTEEVKEENLKNV
VNKKNIEKMYERMYA	NTENQRPKTGFQMWL
TFGKEFDKHFGKGGS	SDEADIIKEGMIRFR
KFIQTFGKEFDKHFG	VLSTEERKVWANKAK
CKFSMKMKMIDSARK	ERKVWANKAKGETAS
QGFLFSEKPEKNLLI	KVWANKAKGETASEG
RVYVYNGKETTLGDM	ASEGTEAKKRKRVVD
QRSSLLEKGLDGAKK	SEGTEAKKRKRVVDE
KTYEDIDKRGKYDLL	ETENQEEKAKENLNL
ILTPIIFKEENLRTM	ENLNLSKKQKPLDFS
EDIDKRGKYDLLRST	LNLSKKQKPLDFSTN
KAEAIVYKHGSGRIK	LDFSTNQKLSAFAFK
KGLSSDNKPMVNLDK	QKCGLSYKALVALRR
VERASGCKYLDYMQK	ADLYEELKTSTAILS
NEKNDFTKFKTEQEN	TGIGSLDKLLDAGLY
SLADIMAKRNQKPEV	LLQLLQAKTQDEEEQ
KRTRRAVKFQRAITG	TGSSGTVKVVVVDSV
RYARTDGKVFQFLNA	MQLARELKTLARDLG
GKTTILYKLKLGEIV	RRMACLAKSSRQPTG
ILLVQPTKRPEGRTY	LWEMPAEKRIFGAVL
GRHMGIGKRKGTANA	QRQRRIYKTTTHVPP
REERLQAKKEEIIKT	MDSETFEKSRLYQLD
APSTGGVKKPHRYRP	SRLYQLDKSTFSFWS
EKSSFLCKRSQTCVD	NTFVIEEKHGFNQQT
TINVEFAKGSKRDMA	QTLGFFMKDAIKKFV
MIFVGIKKKEERADL	FFMKDAIKKFVVTQC
IFVGIKKKEERADLI	FMKDAIKKFVVTQCI
KVENFIHKQERRLFT	SLLLYIIKIGGDYFF
RMQVDPQKYKGIFNG	PLPEGKLKEEIEVMA
MYKEEGLKAFYKGVA	EEIEVMAKSIDFPLT
AATHIARKAVELDLV	VYVVEGSKRSSHSNA
GGRFVALKRVRVQTG	EEYSVLNKDIQEDSG
KSAQPIEKFVTDIDE	EGNSEEIKAKVKNKK
LREICLLKELKHKNI	NSEEIKAKVKNKKQG
KFGHTFCKYSEEMKK	EEIKAKVKNKKQGCK
FTDLYDIKRAVVHTH	IKAKVKNKKQGCKNE
VKQLPLVKPYLRSVQ	KNKKQGCKNEEVLAV
RAVNYFSKVKQLPLV	GHELGHWKLGHTVKN
QKIVLYAKKVGYTPD	WKLGHTVKNIIISQM
EPEWAYGKKGQPDAK	FAVLIGRKELFAAFG
SFKVGVGKVIRGWDE	DLYSALIKLNKDNLG
KDLKDKAKETADAIT	SALIKLNKDNLGFPV
LPEHAVLKMKGNFTL	IWELIKEKLIFPYVE
FNFGQKEKPYFPIPE	KDAAEAIKKHNVGVK
APAAGDGKTEQKGGD	EKRVEEFKLKQMWKS
HAAENPGKYNILGTN	RVEEFKLKQMWKSPN
KKAEVEGKDLPEHAV	FVVPGPGKVEITYTP
QGQFWGQKPWSQHYH	TPSDGTQKVTYLVHN
KAVVVCPKDEDYKQR	MGMYNQDKSIEDFAH
FEYIEENKYSRAKSP	SFQMALSKGWPLYLS
AWAIFKGKYKEGDTG	WPLYLSTKNTILKKY
TMFRIPWKHAGKQDF	TKNTILKKYDGRFKD
IPWKHAGKQDFREDQ	DMVAQAMKSEGGFIW
RLRCALNKSSEFKEV	PGEPPLIKGWLPYLG
SGQPGTQKVPSKRQH	GVVLNLRKDPLRFMK
FTCAKKLKKRNKPCP	RFMKTLQKQHGDTFT
TCAKKLKKRNKPCPV	FTVLLGGKYITFILD
MACFTCAKKLKKRNK	FQYQLVIKNHKQLSF
ACFTCAKKLKKRNKP	SFRVFSNKLLEKAFS
HYASEEIKEKLLQLT	FSISQLQKNHDMNDE
HSGHPSEKEIKAQQD	CYQFLQGKSLDILLE
RLVDTGDKFRFFSMV	ESMMQNLKQVFEPQL
RHPGKGVKSPGEKSR	VFEPQLLKTTSWDTA
GVKSPGEKSRYETSL	TFTTIYGKVIVCDNN
PAAKVSKKELNSNHD	VIVCDNNKFISELRD
VTEFEDIKSGYRIDF	DFLKFDDKFAYLVSN
AGAALAGKLRSGDRS	SIREKIIKCFSSEKL
TDNRVSGKYFAHIIK	IKCFSSEKLAKMQGW
DGKNLTIKTESTLKT	LLQSTGQKKGSGFPI
RWRLVDSKGFDEYMK	LQSTGQKKGSGFPIH
EMVHTGLKLERALLV	TGDYCVRKGDLVAIF
PTESSMYKYPSDISY	DRFIEDGKKKTTFFK
KIHAQWQKEGNDKDF	RFIEDGKKKTTFFKR
DVEKAFMKASSELFS	FIEDGKKKTTFFKRG
PYCKLVQKSLARMLL	TFFKRGKKLKCYLMP
PDADSFVKFALGSVV	FKRGKKLKCYLMPFG
AGNLNTYKRLAIKLP	PFGTGTSKCPGRFFA
TKRVLPGKYLEEIAT	FFALMEIKQLLVILL
PKEQWWLKLRPLMKI	DLEIIDDKPIGLNYS
FDRNFGTKISARAME	RGDASGLKRNSERKT
DFEHRIPKEQWWLKL	LKRNSERKTPEGRAS
EKSVLQGKLTKLAVQ	ISLCPTEKNVDLSTF
MSREVQSKIEKKYDE	FEQLQKWKEVAQDCT
QGYYDYVKPRLRTTI	EVAQDCTKAVELNPK
GGKFVESKSDKWIDI	KALFRRAKAHEKLDN
FVESKSDKWIDIHNP	AHEKLDNKKECLEDV
PPRLKEMKSQESAAG	EKAKEKYKNREPLMP
GIKSLVSKGTLVQTK	IISQPMLKGEKSDED
SRIKLGIKSLVSKGT	NSGYLKAKQYMEEEN
LEQSTIVKERGTVYF	KIISECSKEIDAEGK
TTVKFVVKMTEEKLA	AAKPDLDKVISLKEA
EVVKKKNKAGVSVKP	LRANALIKRGSMYMQ
NKAGVSVKPFQVKNH	YHHRGQLKILLDQVE
HALTSILKAEGLRGI	KADEMYDKCIDLEPD
PPPKAAFKEPKMALK	GLLQLQWKQDLDRGL
DKKPAKDKSSTRGEK	RGLELISKAIEIDNK
SKESSVVKNVVDSSQ	KAIEIDNKCDFAYET
PQYFSSAKYAKEGLI	VQRGNMEKAIDMFNK
NYKFRFHKPEEANEP	NKAINLAKSEMEMAH
IAYKFTPKYILRAGQ	VQILIDGKYYQADQL
LLLKISEKEEVTTRE	ECSSVYSKGRILTTE
KGGKQLNKYDPFSRN	ILTTEQTKLMISGIT
EIFLLCDKVQKEDIE	PNSLQTLKLMQIRKP
TFKSIMKKSPFSGPT	LKLMQIRKPLLKSSL
LLCDKVQKEDIEVYF	ESSLKEAKISEIQMT
NLGIQCVKKRDLEQA	LKLTYAEKLHRLESQ
KRTYETFKSIMKKSP	RLESQYAKLLNTSRN
ETFKSIMKKSPFSGP	RNTNIARKKDYHAEL
ENEGGIDKFSRGYES	NTNIARKKDYHAELM
GKDLDFEKAKPRMDQ	DQKEENIKSVQEIAE
ATKRSFSKEVEERSR	QCVEQHIKENTAYFE
IEDFILHKMLGKGSF	FEFFNDAKEATDYLR
RFEELGVKFVKKPDD	TDYLRNLKDAIQRKY
SRIYLEGKIDYGEYM	LKDAIQRKYSCDRSS
DVAYQYVKKGSRIYL	DRSSSIHKLEDLVQE
YRPRRKAKMLPKNCS	KEELLQYKSTIANLM
PSLSSMQKHMKGHKP	TIANLMGKAKTIIQL
ESTLKSHKRIHTGEK	RNSDCPLKTSIPIKA
SSMQKHMKGHKPEEI	LKTSIPIKAICDYRQ
QKHMKGHKPEEIPPD	QIEITIYKDDECVLA
EMGKGSFKYAWVLDK	ANNSHRAKWKVISPT
IDKRTIEKFEKEAAE	NSHRAKWKVISPTGN
RTIEKFEKEAAEMGK	HESHINMKSVVSWHY
LAYTLGVKQLIVGVN	ASNVASIKTMLPGEH
TVAVGVIKNVEKKSG	EKEVNVCKQYYQELL
LPLQDVYKIGGIGTV	QYYQELLKSAEREEQ
KEVSAYIKKIGYNPA	MSSTYIDKLKTVNLG
TPKGSSLKIEERAEF	KTVNLGLKNTQAAEA
PFKCFTPKGSSLKIE	LVKLYETKLCEEEAV
KHKKMKLKIGDPSLY	EEAVIADKNNIENLI
EQLLEKRKNAHGEEK	ENLISTLKQWRSEVD
NKNKNRYKNILPFDH	WRSEVDEKRQVFHAL
TDLVEHYKKNPMVET	ALEDELQKAKAISDE
FTEDNLKKLYVSNLG	EDELQKAKAISDEMF
NQRITAFKMEKAPID	AISDEMFKTYKERDL
LPRLIIRKVDKQTAL	DEMFKTYKERDLDFD
HSPESEDKYRKINED	DFDWHKEKADQLVER
NLGMNNRKPDLRVLI	RDLEGIGKSLKYYRD
LNKNMQAKSPPPMNL	QVETTQRKIQENQPE
ESEDKYRKINEDIDL	ENQPENSKTLATQLN
WMPMREEKNFLLLSY	ATQLNQQKMLVSEIE
KPTMNYEKLSRALRY	LVSEIEMKQSKMDEC
AQKWGQRKNKPTMNY	SKMDECQKYAEQYSA
VMPDGQFKDISLSDY	SQQKSPVKRRRMQSS
GHPAPNFKATAVMPD	TLMTQYIKFAGDSLK
DISLSDYKGKYVVFF	KEHVEKAKELQKWVS
EVYRHFGKAPGTPHS	KTLKDAEKAGKPPFS
DFLSDEIKEERKIQK	KPPFSKQKISSEEIS
PKFNFVGKILGPQGN	TIQLFLAKHGDKMTD
VRKLDNTKFRSHEGE	FLAKHGDKMTDEERN
VEVAGDDKYGRKIIV	NELEKQVKTLQESYN
GIPRQVLKYDDFLKS	RQQEYKEKLQGICDL
RLNQYFQKEKIQGEY	GDGTVELKKYQSKQE
GRNALIHKSSVNCPF	DGTVELKKYQSKQEE
EKIQGEYKYTQVGPD	SKQEELQKDMQGSAQ
FGGPEVLKLRSDIAV	QALAEVVKNTENFLK
KGWYQYDKPLGRIHK	EQKLNEAKIKCEQLN
ILADEALKLGILDKV	KLNEAKIKCEQLNLK
DFLQAKAKSKTLDFI	KVVTTAIKEETEKVA
LQAKAKSKTLDFIDV	VKQLEESKTKIENLL
CIKHYHIKETNDNPK	QLEESKTKIENLLDW
EKLSDFFKTHYRLEL	DWLSNVDKDSERAGT
GKDPNAPKRPMSAYM	ERAGTKHKQVIEQNG
PVEVKKGKDPNAPKR	HFQEGDGKSAIGEED
HGKTFDYKIPYTTVL	NQQYQKVKAQHEKII
SRQGIIFKNSKTGKV	KVKAQHEKIISQHQA
IEREEYGKLFDFVNA	SAQVLLEKQGQYLSP
RVINEEYKIWKKNTP	EKLQKNMKELKVHYE
QIERLQEKVESAQSE	SLQEELEKFDADYTE
ANTESYLKRRQKTHV	DINGLMTKLKRQKSF
KQPSQEVKMEAKMEV	SEDVISHKGDLRYIT
VYTCNECKHHVETRW	NRVLEAAKSCSKRDG
EQEEEERKREENTSN	CSKRDGGKVDTSATH
LSPFAMDKKAVPGGG	RFRSLYSKCNVLGNN
VSNDLSQKLYATMEK	NVLGNNLKDLVDKYQ
NESTDVTKGDSKNAK	QRQLEETKALQGQIS
PMDLSTIKRKLDTGQ	SQQVAVEKLKKTAEV
QEVKMEAKMEVDQPE	QVAVEKLKKTAEVLL
MPKMKMPKFSMPGFK	RGSLLPAKNDIQKTL
KGKFSLFKSKKPRHR	GRYEDLSKSVNERNE
LEYELEAKSHLKDDR	GNVESSLKEQGQVPL
DDRSRLVKQMEDKVS	ALQDIISKNIMLEQD
LVKQMEDKVSQLEME	SINAMNEKVKKFMET
REEKERIKYEEDKRI	NAMNEKVKKFMETTD
QKRPEILKHEMKVFF	AMNEKVKKFMETTDP
QYTGGIAKLERDMSN	SSLQAKMKDLSARFS
RNRFIHWKTSGDTLE	RFSEASHKHKETLAK
ANEIATNKPKITWQA	SEASHKHKETLAKME
KRRHLAHKFCLTPAG	KMEELKTKVELFENL
STTSKETKKDTKLYC	LFENLSEKLQTFLET
NRLEELMKPLKVVDP	LQTFLETKTQALTEV
YNRLKQIKEFHRKHP	TEVDVPGKDVTELSQ
KIQAEFEKKWENGTF	TSEFLEHKKHLEVLH
MELAKEEKCEFLPFL	EVLHSLLKEISSHGL
KEGAGEQKTEHMTRT	DKALVLEKTNNLSKK
AKLHVAVKVLQDMGL	KTNNLSKKFKEMEDT
MRVGLVAKGLLLKGD	KEMEDTIKEKKEAVT
VLQQRLIKFFIDQSK	MEDTIKEKKEAVTSC
KFFIDQSKKDAEKYA	EDTIKEKKEAVTSCQ
PRYTLHYKTDAPLNI	DAFQVLVKSLKSWIK
EVKEDIAKLLRYESS	QVLVKSLKSWIKETT
NKRNAMNKVFWREMV	KSLKSWIKETTKKVP
EMVECFNKISRDADC	SWIKETTKKVPIVQP
VQATTENKELKTVTF	WIKETTKKVPIVQPS
DLSGNDFKGGYFPEN	LQEKWSLKTPEIQKV
PEGTVEIKFRRKDLV	AKAIAAVKSGGAVLN
INTPYVTKDLLQSKR	TEEFWANKGLTSIKK
LTFLVAQKDFRKQVN	NKGLTSIKKDMTDIS
GRKVIEYKSTRDLET	LGLLLKDKIAELNTK
LRNQIHVKSPPREGS	AMMQWLQKMNKTATK
SFSDPTSKMRHLETH	KMNKTATKWQQTPAP
NTLQAWSKTTPRRIN	KTQVEQNKSFEAELK
KRHSYFEKPKVDDEP	KSFEAELKQNVNKVQ
KKKSYYAKLRQQEIE	VNKVQELKDKLTELL
TMIGAGSKDAGTLNH	LTIDRQQKLEESSNN
LLQHPFLKLAKPLSS	QTVEAQLKQWLVEKE
QAVLDVLKFYDSNTV	LKQWLVEKELMVSVL
DRRVVNGKVEYFLKW	LQEFATRKPQYEQLT
GKVEYFLKWKGFTDA	PSLRGIVKEQLAAVT
TSNASTTKYPQSPTN	QLAAVTQKWDSLTGQ
PQSPTNSKAQKKNRN	WIDQAIVKSTQYQSL
AIEKLSGKEINGRKI	LLRSLSDKLSDLDNK
RRTSGRDKYGPPVRT	QQLETAQKMKQEIQQ
WTMTKIQKHQEHILR	KQEIQQEKKQIKVAQ
MAILQIMKELNKRGR	QEIQQEKKQIKVAQA
LVKRLGDKHATLQKS	RQLEGILKSFKDVEQ
FQLHRALKMIVDPVE	FQAWLDTKKEEQNKS
LRINSGGKLPNFGFV	QAWLDTKKEEQNKSH
NLPHEVDKSELKDFF	KSHPISAKLDVLESL
RALKQQKKAQIRANG	ESLIKDHKDFSKTLT
LLTCESCKGFFKRTV	KDHKDFSKTLTAQSH
YKRDRALKQQKKAQI	AQSHMYEKTIAEGEN
CPFCRFQKCLTVGMR	EGENLLLKTQGSEKA
DRALKQQKKAQIRAN	LKTQGSEKAALQLQL
VLMRLQEKLKGVEEG	QLQLNTIKTNWDTFN
TTSTRIGKFEARFFH	TNWDTFNKQVKEREN
ARKRQAAKTCAHPGC	DTFNKQVKERENKLK
SGAGEASKFSDDHYR	ESLEKALKYKEQVET
KAPVLFNKEMIESMK	TLWPWIDKCQNNLEE
KEIFQNEKRVALSPA	AKLKSLQKEMDQHFG
NNITKLLKAISPDKD	LSVCEIDKGVVTDEN
KIRSSVEKENQKSKG	ENKSLIQKVDMVTEQ
SVEKENQKSKGQEND	VTEQLHSKKFCLENM
SQVKASEKILQVRAA	TEQLHSKKFCLENMT
GPTVTQVKAEKQEDS	ENMTQKFKEFQEVSK
VANLLSGKSPRKSAE	KEFQEVSKESKRQLQ
MKMHLAGKTEQAKAD	KRQLQCAKEQLDIHD
RAIESLVKKLKEKKD	TMLQTQQKSLQALKH
WRWPDLHKNELKHVK	QKSLQALKHQVDLAK
APGDAVHKIYPSAYI	VVEASDSKGTSDVLL
YNEASSHKYVPRAIL	LSQQVDEKCSFLETK
LAMDLKGKMPNKMIR	ASNDNANKTCKMMLA
KRRSLSPKPRDKSRR	DNANKTCKMMLATEE
DNMSEYSKQMQRFNV	SPDLVGIKRDLEALS
DIGAGKGKYYAVNYP	RDLEALSKQCNKLLD
PMEPPRFKINKKIPR	EQVEGTIKRLEEFYS
KDKVIYSKYTDLVPK	RLEEFYSKLKEFSIL
LDGKGEPKGAKRAKP	EEFYSKLKEFSILLQ
SSAEFLEKRRAALER	EIEPLQGKQQDVNWL
GKARVLIKSPKGKEV	DDVNARWKTLNKKVA
VDLIKTYKHINEVYY	EELVANQKPPSAEFK
NFGYSYAKRMIDVQN	KPPSAEFKVVKAQIQ
VGRSGRGKSFTLTIT	SAEFKVVKAQIQEQK
EPRRHRQKLEDQTKP	QRLLDDRKSTVEVIK
QKLEDQTKPFPDRFG	VIKREGEKIATTAEP
NILFVITKPDVYKSP	ADKVKILKQLSLLDS
AQLAAAEKFKVQGEA	RWEALLNKAETRNRQ
LDPSVKIKTTMDLME	EWLTTIEKRLVNCEP
VWYVPDKKKAPSSPP	EEQIAQHKALEDDII
WYVPDKKKAPSSPPP	VSIGQSLKVLSSRED
ALEKAGQKLIDVNHY	VLSSREDKDMVQSKL
LKSWVNEKMKTATDE	DKDMVQSKLDFSQVW
PMVARKQKLADSLRL	WYIEIQEKSHSRSEL
RALSSEGKPYVTKEE	QQALCNAKIFGEDEV
FVPAAYVKKLDPAQS	EVHDKLSKLSVQDYS
IAAGHYAKGDISSRR	YSTEGLWKQQSELRV
NLQGKVQKHQAFEAE	QEDILLRKQNVDQAL
RNKSLNLKHIKHFIL	QDKLEAIKARYKDIT
APAKKDVKGSYVSIH	SYETQVLKGEEASQA
DQDGAFTKWRVENSW	MRPKELKKEAKNNKA
SSGLNSEKVAALIQK	VSDTITQKVEEVDAA
RGVGGQEKHAPLADQ	SWITETEKKLMSLGD
ENNLIVDKATKKAVI	WITETEKKLMSLGDI
EKSPEWSKFLGLIKK	SAQLQVQKTFTMEIL
EVVQNFAKEFVISDR	DIIDDLVKSGHKIMT
GTDKTLVKEVVQNFA	TACSEEEKQSMKKKL
GDKTINSKAHAEQAI	SMKKKLDKVLKNYDT
YHNVGLSKCEIKVAM	KKLDKVLKNYDTICQ
KEHKLNGKVIDPKRA	RELIAEHKPHIDKMN
EKIYQMLKNLLQLSP	EHKPHIDKMNKTGPQ
DSLLAVVKREPAEQP	PHIDKMNKTGPQLLE
LRKSHLAKEGLYQYK	EGFSIQEKYVAADTL
DREREGEKEKASWRA	DTLYSQIKEDVKKRA
GEDVLGNKVERKEDG	SQIKEDVKKRAVALD
CSSSKRSKEEVGINT	QSTQFHDKIDQILES
YSYKPCDKISSGSNI	SAEVEKIKEQISENK
RLPVWFAKGSDTSKK	KEQISENKNVSVDME
SGSNISKKSIMVQSP	NVSVDMEKLQPLYET
LRKIRNTKYPIQRAL	QPLYETLKQRGEEMI
SKEVRNLKWLGFRVP	DVMELAEKFWCDHMS
LKYDSWHKEVLSKFG	MSLIVTIKDTQDFIR
DLSSQLLKVLGTRKL	GIDPSVVKQQQEAAE
RSFDSEFKLACKVDG	AACGEPDKPIVKKSI
NRSTALLKSLSAERE	EPDKPIVKKSIDELN
EKHLEERKKRLEEQR	PDKPIVKKSIDELNS
GGKYGIDKDKVDKSA	SAWDSLNKAWKDRID
VQKDRMDKNASTFED	DSLNKAWKDRIDKLE
ESQQDYSKGFGGKYG	AWKDRIDKLEEAMQA
EEKRVNSKFDTIYQI	WVDIAGGKLASMSPI
AWHNNVEKTLPSTKA	KQQIEELKQFKSEAY
DDIPEEDKGNVKQCE	IEELKQFKSEAYQQQ
SLLYRWMKHEPGLGS	HQAELLLKKVTEESD
DFIVEQYKHLRQRDG	KVTEESDKHTVQDPL
NKKRIIEKVIHRLTH	QDPLMELKLIWDSLE
DTAEKPGKEEDVVTP	RIINRQHKLEGALLA
RGRQTVDKVMGIPKE	EGLLSEQKPVGGDPK
RKNRSSGKTPETLVP	KPVGGDPKAIEIELA
PKASQSRKRSLATMD	AIEIELAKHHVLQND
HGLQMRLKYSQSDLE	LEKTEQRKQQLDGAL
KYQIAVTKVLGKNMD	DGALRQAKGFHGEIE
FDTPFLPKPLFFRRA	GGLPETAKEQLNVHM
HATEERGKPSEQLTP	VCAAFEAKEETYKSL
ELKENDIKPLTSFRQ	EAKEETYKSLMQKGQ
DEYHCKKKYGVAWEK	TYKSLMQKGQQMLAR
KEEKYVAKELAVRTF	QMLARCPKSAETNID
APLLSTPKRERMVLM	DQDINNLKEKWESVE
RLKNNQSKFFRVLNG	DINNLKEKWESVETK
PMQKKYYKYILTRNF	LFQIDEHKVFANEVN
KYHEEFEKSRMGPSG	DKTGTHLKYFSQKQD
CKMTLNMKNYKGYEK	HLKYFSQKQDVVLIK
GGMGTKSKDKKLSGT	KQDVVLIKNLLISVQ
KPGSGGRKNGGMGTK	SVQSRWEKVVQRLVE
DLQIGTEKAEKNEGR	DDARKRAKQFHEAWS
FTKANFDKESERHFI	QFHEAWSKLMEWLEE
TLATWATKELRKLKN	EWLEESEKSLDSELE
AFGKDVLKLVEARPM	FQKSLGAKHSVYDTT
ERANQVLKFTKGKSF	TGRSLKEKTSLADDN
SYVFTSEKANQEEDI	KWDTICGKSVERQNK
VYLDEPIKIGRSVAR	MNLIDNHKAFQKELG
KIEIHYAKTAKKMDM	AFQKELGKRTSSVQA
SSGLGKAKRKACPLQ	RDDSSWVKVQMQELS
QREAEFTKSIAKFFD	VCALSISKQTRLEAA
SLKRFDDKYTLKLTF	PDSITTIKHWITIIR
KTKKDNMKYASWAAS	EEVLAWAKQHQQRLA
LHLVCNVKSPSKMPE	AETTLTDKDKEVIPQ
LYRIFNNKSSVDLKT	TTLTDKDKEVIPQEI
LLMSNGNKEGASGRP	PQEIEEVKALIAEHQ
VMEGHLFKRASNAFK	FMEEMTRKQPDVDKV
KSRRDLEKLVRRLLK	RKQPDVDKVTKTYKR
RLVEIAAKNLQKEVI	PDVDKVTKTYKRRAA
PRENMLMKYAQVKPD	DKVTKTYKRRAADPS
AEVHESYKHLKSLQS	SHIPVLDKGRAGRKR
QTARFLMKSYDQVHS	DKGRAGRKRFPASSL
KPDGTYVKPLSNKLT	SQTQIETKNPRVNLL
AQSTLDAKATKAKSK	RVNLLVSKWQQVWLL
WSQFLKFKEMELPAK	LALERRRKLNDALDR
TGRITVEKIIKIIIT	FDFDIWRKKYMRWMN
VQKKTFTKWVNKHLI	DFDIWRKKYMRWMNH
SIAGLLLKATNEKLS	YMRWMNHKKSRVMDF
VPRWSNAKMEIATKD	MRWMNHKKSRVMDFF
DVNVNFEKSKLTFSC	DFFRRIDKDQDGKIT
EMRKLFEKYGKAGEV	IDKDQDGKITRQEFI
AGEVFIHKDKGFGFI	IDGILSSKFPTSRLE
NKTFNLEKQNHTPRK	VAALHPNKDAYKPIT
IDLKNFRKPGEKTFT	KPITDADKIEDEVTR
QGLIRMYKAECLEKF	EVTRQVAKCKCAKRF
LNEGVKGKKLTFEYR	TRQVAKCKCAKRFQV
DMSSRHFKPEIRVTS	VAKCKCAKRFQVEQI
QLKHTWQKANDQFLE	VEQIGDNKYRFFLGN
ENPDEAEKALKHMDG	ALDEFLVKNDPCRAK
ESKERLGKIVDRIDN	KNDPCRAKGRTNMEL
RLLEGDEKEYNADGG	TNMELREKFILADGA
EYNADGGKMPIKWMA	PLTRNYGKPWLTNSK
VEEVILKKMSPQELK	KPWLTNSKMSTPCKA
ELKEVDSKLQENPES	SKMSTPCKAAECSDF
IRLLMHGKEVGSIIG	GTPIQGSKLRLPGYL
DGHEFIVKREHALTS	TQFADSKKTPSRPGS
QFLAVDPKGRAVMIS	GSRPSTAKPSKIPTP
IHQETFGKSGCRRIV	PSTAKPSKIPTPQRK
RSDESAAKKPKWDDF	KIPTPQRKSPASKLD
KPKWDDFKKKKKELK	QRKSPASKLDKSSKR
SDESAAKKPKWDDFK	IVTVKKNKRHMAEVN
RSWHDIEKDNARFMK	EVNASPLKHFVTAKK
CYRVEWAKFQERERK	HFVTAKKKINGIFEQ
VIICIKNKEFEKASK	DVKGYLSKVRGISEV
ERDFYFGKLREIELL	VLARRHMKVAFFGRT
TDPASNTKLIAMKTE	FGRTSNGKSTVINAM
NTKLIAMKTEKEEMS	INAMLWDKVLPSGIG
RKRYDGLKYDVKKVE	LTEGSEEKRSAKTVN
NTMENVKKAVEQIRN	SEEKRSAKTVNQLAH
KKKSHSIKPESWSKS	AHALHQDKQLHAGSL
SGGEFQGKREKSDKD	SVMWPNSKCPLLKDD
TKMKPQGKPSSLMNP	ELDSWIDKFCLDADV
EESEKLSKMSSLLER	STLMQTEKHFFHKVS
SAKPAPPKPEPKPRK	VLNARIQKAQGMPEG
RSARLSAKPAPPKPE	EQHTVRAKQIAEAVR
KHSIANAKFLETAKK	EERQDRLKFIDKQLE
IQTIAQYKFVYQVLI	ELLAQDYKLRIKQIT
KKVKFQAKLEHEYIQ	QDYKLRIKQITEEVE
DSNVSSSKKRRHRTT	PVVLKVYKNELHRHI
GERPYKCKECGKAFN	QDMIDGLKPLLPVSV
KKHQLEGKLQDIRCR	NYDLNCDKLCADFQE
QLLTLKIKYPHQLDQ	VVGGVVWKAVGWRLI
LKVECGPKYPEAPPS	LTWTTKAKERAFKRQ
LLEKDPEKRLGFRDE	KAKERAFKRQFVEHA
DKFSQASKDFCEALL	FVEHASEKLQLVISY
EPVKYPDKFSQASKD	QEIAAMNKKIEVLDS
PAFYAPQKKFGPVVA	DSLQSKAKLLRNKAG
KFTPVASKFSPGAPG	KAKLLRNKAGWLDSE
FMKRLHEKVNIIPLI	IHSSVQCKLRYGMWH
QFKKQIMKEIQEHKI	DGNICTGKGKLAKEI
STKEFFTKHKYFGLK	LAKEIAEKLGFKHFP
RSAWPLAKCNTNTSN	DSTTGDGKPLATDYN
TEEEKKTKKKDAIVV	NGNCSLEKFYDDPRS
AEEWYKSKFANLNEQ	VDHYNEVKSVTICDY
VLPLNIDKADTGKNL	EVQRRIQKKGDPHEM
GQPPLTYKRFQTLIS	KGDPHEMKITSAYLQ
DRDNKELKAFNIRLE	DIENAYKKTFLPEMS
KVIKSVGKIEHSFWR	REAQDSKKVVEDIEY
CFRQFFTKIKTADRQ	IEYLKFDKGPWLKQD
KHKTFVEKYEKQIKH	LRLLVQDKFEVLNYT
KMDPTDAKYHMQRCI	FRELPGRKYSPGYNT
IADFGLSKIVEHQVL	SIILEGFKSYAQRTE
NLGTGAGKGELERAF	NGQAGITKASVSITF
RSRSGSIKGSRYFQS	ITFDNSDKKQSPLGF
VKVLSTTKPFEYETP	TFDNSDKKQSPLGFE
QKRPVIVKVLSTTKP	IMQGRITKVLNMKPP
PRKQLATKVARKSAP	ITKVLNMKPPEILSM
REIAQDFKTDLRFQS	TRMYEYKKIAAQKTI
LATKVARKSAPATGG	EITPTIQKLKEERSS
TGGKAPRKQLATKVA	FLLAEDTKVRSAEEL
SLAAEWGKYGMRFNV	EMQDKVIKLQEELSE
DPTGTFEKEMIGRIP	EELSENDKKIKALNH
RLRILYTKILDVLEE	SENDKKIKALNHEIE
NEKLAMVKAEPDVKK	ELEKRKDKETGGILR
QLYNIYAKHTKQSLQ	EAQRVNTKSQSAFDL
YRALVSTKWLAESIR	SAFDLKKKNLACEES
RPEPAVFKATLDRSL	ACEESKRKELEKNMV
TLQDRNEKLFYRVLT	AKEKEVKKITDGLHA
ESLVDFSKALGKHPV	AGQMMACKNDISKAQ
FNPVPVMKLVEVIKT	ACKNDISKAQTEAKQ
YERGDASKEDIDTAM	KQAQMKLKHAQQELK
MKLVEVIKTPMTSQK	AQQELKNKQAEVKKM
VGKSTFVKLLTKTYP	KNKQAEVKKMDSGYR
VKIESLAKSLEDALR	NKQAEVKKMDSGYRK
GKTQWALKYAKENPE	EKLEAEMKKLNYEEN
HARQCLLKNISIRRE	KLEAEMKKLNYEENK
TKNDDLNKPINKGRK	PNLRFAYKDPEKNWN
IISVTPVKNIDPVKN	FAYKDPEKNWNRNCV
KMITDSGKFSGSSPA	NWNRNCVKGLVASLI
ENMKAVLKTSSPSVE	VASLISVKDTSATTA
ERNKTRGKMITDSGK	DTEVTGKKLLERGEL
LEAKCALKYLIGELV	YTIIPLNKISARCIA
FHFQREEKFWIMETA	CDNMDNAKKVAFDKR
KLNKVDQKVKVFNLD	DNMDNAKKVAFDKRI
LYNCKLNKVDQKVKV	EEELAGLKNTAEKYR
RQPPSSKKSDGSGTY	GLKNTAEKYRQLKQQ
DGSGTYTKLQNTQVR	AEKYRQLKQQWEMKT
HVRKIVEKHFRDVES	LKQQWEMKTEEADLL
QNHKHHDKFTNTYQA	EADLLQTKLQQSSYH
EVDEQIKKQQETLVR	EELDALKKTIEESEE
RYPPWPGKIVNPPKD	EESEETLKNTKEIQR
AKTQQASKHIRFSEY	ELKDAQKKLDCAKTK
KVKKIIQKDIIKEAS	KLDCAKTKADASSKK
RVLDMEGKDEELIKM	KADASSKKMKEKQQE
NSGGDSLKSIRLLSE	TLELEELKREHTSYK
AKMTPTKKYNGLEEK	KREHTSYKQQLEAVN
SQLFAKNKESQREKE	EAVNEAIKSYESQIE
EDWLSSAKIHQKFGS	VMAAEVAKNKESVNK
DSSPGFSKEIAAALA	AAEVAKNKESVNKAQ
HKYMEANKNIGKIVL	QEEVTKQKEVITAQD
ASEDIYDKIKTGLAG	QDTVIKAKYAEVAKH
RTVQWWFKKFCKGDE	AKYAEVAKHKEQNND
SRRIEFYKESKQQAL	YAEVAKHKEQNNDSQ
LYYSFVDKPVAYKKR	QNNDSQLKIKELDHN
TFNVTVTKTDKTLVL	NDSQLKIKELDHNIS
QARYNEAKKTLTELK	ELDHNISKHKREAED
ARYNEAKKTLTELKT	DHNISKHKREAEDGA
ESRSTCLKTNDEDKS	EAEDGAAKVSKMLKD
IHRAEISKIMRECQE	KLQEMKEKLGRNVNM
IMKDMLEKKVKKVVV	ERYNDLMKKKRIVEN
ADAEEALKQQRSRKN	RYNDLMKKKRIVEND
ARLRKSGKEHIDNIK	YNDLMKKKRIVENDK
GKALADGKRLSDYSI	KRIVENDKSKILTTI
QRLLFKGKALADGKR	IVENDKSKILTTIED
GKIECEIKINHEGEV	TIEDLDQKKNQALNI
ETFNSITKRRHHCKL	IEDLDQKKNQALNIA
SKRNALLKWCQKKTQ	IAWQKVNKDFGSIFS
AREYGGSKRNALLKW	ILSMLLFKPAPIYIL
KSAPAPKKGSKKAVT	QFIVVSLKEGMFNNA
KKRKRSRKESYSVYV	KEAKSKAKPPKGAHV
QIEAELNKHWRRLLE	IPVTLNMKMVMPSWF
CSKIQILKCGGTARS	PEDEAGIKKAAENIK
ICQKITCKGFKVEKP	TPARVQFKTYPGVMH
KGALDLEKPPLPQPG	MTREDWRKKKELEEQ
NPPGNWKKPSDSLSV	KELEEQRKLGNAPAE
WQEFFNEKDILSPNK	PWYIDPSKRPTLKHQ
YTNGQYVKQGKFGAA	PSKRPTLKHQRPQPE
KLGWRDLKGLYEDIR	HQRPQPEKQKQFSSS
FRWLFDKKFLAEAAI	RPQPEKQKQFSSSGE
HSQAAPVKWIFQDNL	SSSGEWYKRGVKENS
TTKCSSVKYDVEIVE	EWYKRGVKENSIITK
TFSWPGPKTVTLKRT	SIITKYRKGACENCG
VSKNKDGKEQSETVS	NCGAMTHKKKDCFER
KYTITPVKMRKSGGR	CGAMTHKKKDCFERP
ASKSSKGKDGVEVEA	RPRRVGAKFTGTNIA
EVEAPSRKRKLSPGP	LMFDYDGKRDRWNGY
SLILNNLKTLLWKKI	DLAKRTLKAQKLQEE
AQNKGGIKRSASAAR	QEELASGKLVEQANS
TKKTWFDKPNFNRTN	VEQANSPKHQWGEEE
RATEEISKDLRATLN	EPNSQTEKDHNSEDE
AAIQHNYKMSAFKEN	SEDEDEDKYADDIDM
FRIDNFSKVPVVFTQ	PGQNFDSKRRITVRN
KKNEPLGKLTSLFKL	NSAYYDPKTRAMREN
QREGTFSKSDSEKIV	NPYANAGKNPDEVSY
TSPTTQSKHNTTSAK	FAWEAYDKGSEVHLQ
AIQQLFGKIKDIKDK	ELLYKSFKVKKEDFK
NFEGFLAKRFSGCTL	YKSFKVKKEDFKEQQ
RIPVPVQKNIDQQIK	EDFKEQQKESILEKY
NRLCELEKLRQDFEE	SRHGTVIKGQERAVA
EDKLKCTKEEHLCTQ	HIWGSYWKEGRWGYK
GIPNFILKMYETNKQ	KEGRWGYKCCHSFFK
QDKIVISKVVPAPEA	KCCHSFFKYSYCTGE
LIQAAAGKGRKNSRA	KKKKKHRKSSSDSDD
VSSATQAKEKVKTTI	TMQIDERKRPYNSMY
DCDSASTKVVIRGAG	EMEAYRMKRQRPDDP
ALYNTALKPGHAAAF	HECHFPNKAMPSAGT
YIGYLDYKKERIRKL	GVVGNFNKSIVARLF
LPFPTGYKRQREYEE	LRTLQQIKKSSSNLK
AARQLVEKEKYSEIQ	RTLQQIKKSSSNLKL
EEKHCEFKQLALDHF	LPKSTVDKMLRADVI
PAFKPGEKVLLSDSN	RADVILHKVFLQGYQ
ATGAESDKTEKSVLN	RSNMDILKPILRTLN
LLVKSFIKWCNSGSQ	KELAEATKTLLHSLG
ELKEFFAKARAGSVR	HPEGGGLKIKSLNWY
IHATEELKEFFAKAR	EGGGLKIKSLNWYED
RERQDNPKLDSMRSI	WYEDNNYKALFGGNG
RCLVDNSKSRLPQLL	PYCNDLMKNLESSPL
EGGSVLVKRMFRPME	PLSRIIWKALKPLLV
LKLNPKMKEEYDKIQ	LKPLLVGKILYTPDT
KMKEEYDKIQIADLM	MWEELSPKIWTFMEN
ELGSESAKIKAMGIM	DIVAFLAKHPEDVQS
RPETPKQKGESRPET	MECVNLNKLEPIATE
TSGPVITKLIFAKPI	TEVWLINKSMELLDE
QIQVPGSKFHYVRLV	MELLDERKFWAGIVF
ITKLIFAKPINSKAV	IELPHHVKYKIRMDI
PEVNGDTKWHSFKSY	LPHHVKYKIRMDIDN
LFRRIISKEGIPGLY	DNVERTNKIKDGYWD
DCAKKILKHEGLGAF	VERTNKIKDGYWDPG
IIKGAGGKAFCAGGD	RVLTGTEKKTGVYMQ
EYKSDTGKPYYYNNQ	VLTGTEKKTGVYMQQ
SRYMKPGKELKVLSY	YSVAVIIKGIVYEKE
MKPGKELKVLSYPAH	IKGIVYEKEARLKET
NNCSLILKFRELISR	YEKEARLKETMRIMG
MYPEGQVKSQMKCVV	GLLVVILKLGNLLPY
VKIQPVAKYDWEQKY	DYVGFTLKIFASLLS
THQRHDGKLWNLNNY	PWYFPCTKSYWFGEE
GLTGPWIKRLLPVIF	FGEESDEKSHPGSNQ
KQQSPKDKLNNKLKE	SHPGSNQKRISEICM
TKLIAGNKPVSFLTA	EEEPTHLKLGVSIQN
QYFHRLLKQILASRS	VSIQNLVKVYRDGMK
FGCKFQFKPIRVSEP	KVYRDGMKVAVDGLA
DRAPLRNKYFFGEGY	LGHNGAGKTTTMSIL
TSSVLDKKEGEQAKA	RLKGLSEKHVKAEME
PTSSVLDKKEGEQAK	GLSEKHVKAEMEQMA
VRPLKLSKSKILLSS	DVGLPSSKLKSKTSQ
SEKEPFGKLQLSSRD	LSGGMQRKLSVALAF
SVPPEELKPYHIRVS	IAIISHGKLCCVGSS
GAKYLKRKDIESIRN	SSTVSYLKKEDSVSQ
PTGEIEIKVKTAELL	STVSYLKKEDSVSQS
RSRGILGKFVPPIPK	AISNLIRKHVSEARL
FTQHVYHKYRRRCLN	VLPYEAAKEGAFVEL
TAEAVLQKMDDMKKM	NRRAFGDKQSCLRPF
RYSGVNQKMLFDKLI	GKGSYQVKGWKLTQQ
NQSMLFDKLITNTAE	SYQVKGWKLTQQQFV
IWTFAKVKEFKSKLG	LIVPPFGKYPSLELQ
FAKVKEFKSKLGKEK	ACQCSSDKIKKMLPV
RRLLYFYKPSSKLYA	QCSSDKIKKMLPVCP
DKIASYSKTPKIERS	CSSDKIKKMLPVCPP
KANSSVGKWQDRYGR	NISDYLVKTYVQIIA
VPLQVKCKDCEERRV	TYVQIIAKSLKNKIW
RSNAFAEKNGLQKYE	QIIAKSLKNKIWVNE
TAFSVWTKVPKPVLV	IAKSLKNKIWVNEFR
TSECFPCKPGTYADK	NDATKQMKKHLKLAK
YDLRSFDKGPFATFK	DATKQMKKHLKLAKD
YLSLHDNKYIRYFPG	LDTRNNVKVWFNNKG
AARLSNGKYPKAPEG	VKVWFNNKGWHAISS
EMRPVKHKWTMISRD	ILRANLQKGENPSHY
WLLADGSKVRAPYVS	NHPLNLTKQQLSEVA
FGHPSLVKALSYLYE	LIQERVSKAKHLQFI
ALSYLYEKLYQKQID	QERVSKAKHLQFISG
GYRKLSLKGHNDWVM	LQFISGVKPVIYWLS
APEEQSKKGPSVQKR	IFICFQQKSYVSSTN
CLGEGAVKRPLDVDW	LELFTDNKLNNINDI
LGPVMYGKLPRLETD	RGLIDMVKNQAMADA
LTQMPKWKESSHQGA	RPRPVNAKLSPLNDE
KTGARKWKDPLTQMP	QNDILEIKELTKIYR
KCDLYGEKAKNQGGV	LTKIYRRKRKPAVDR
KQLGADSKLQLKQSK	KIYRRKRKPAVDRIC
GVTGIITKPVEGAKK	LGVNGAGKSSTFKML
ESRIAIEKIRLLTLK	AGKSSTFKMLTGDTT
SLQEQEAKERKTKDD	RGDAFLNKNSILSNI
QCQRTWDKIFHNTLK	VPEKEVGKVGEWAIR
YRGDVVPKDVNAAIA	VGEWAIRKLGLVKYG
GTEVPGHKNWVVSKF	IRKLGLVKYGEKYAG
GGVDFHMKAVPGTEV	GLVKYGEKYAGNYSG
EKEKSKKKKGGKTEQ	PTTGMDPKARRFLWN
KQEKEKSKKKKGGKT	NCALSVVKEGRSVVL
EAKEYVIKACSRKLY	LGSVQHLKNRFGDGY
HAAIDWGKMAEQWLQ	AGSNPDLKPVQDFFG
WYRARVEKVESPAKI	PGSVPKEKHRNMLQY
FVDSHHQKPVNAIIE	SILSQSKKRLHIEDY
AERSSYYKSLLSAEE	QVFVNFAKDQSDDDH
PTAGNAEKLEIAKRL	QSDDDHLKDLSLHKN
GGQNESFKRYEEELE	LKDLSLHKNQTVVDV
KSGPTVTKVVTVVTT	MSECNSNKENSERPP
KSSGFSGKGFKFDET	PPVCLRTKRHKNNRV
LNYVPLEKQEEERQD	CLRTKRHKNNRVKKK
LAEKINAKLNYVPLE	HKNNRVKKKNEALPS
RCIVRALKDPNAFLF	VYYKFIEKSAEELDN
KPSEVAHKSIEAVVA	EIVNEKRKGDCVPAV
DGKDEIIKNVPLKKM	FLMDRFEKESHCENQ
PQAGFKAKLVTLLSR	ESHCENQKQGEQQSL
QGGKARAKAKSRSSR	DCVLCPNKGGAFKKT
IRFATYTKENGRTLV	PNKGGAFKKTDDDRW
GFSESEKKSYFSYFF	NKGGAFKKTDDDRWG
LGFSESEKKSYFSYF	NIPPARWKLTCYLCK
PYEKRLSKVDTLRLA	KLTCYLCKQKGVGAC
PVPLIAQKPVGEMKN	TCYLCKQKGVGACIQ
KEQKKKQKRQENIAK	GACIQCHKANCYTAF
KLQGVFSKQTVLKSH	FHVTCAQKAGLYMKM
RPVLSCKKRRLVRPN	QKAGLYMKMEPVKEL
IKELEDLKRTFKEGM	YMKMEPVKELTGGGT
HVPRKSPKYLALFKN	GTTFSVRKTAYCDVH
PPSFPTNKAATVKSA	IYGDVEMKNGVCRKE
TSLKQTVKANTFGKA	MKNGVCRKESSVKTV
SDTCRSLKYPYVAVM	QVAIQRKKQFVERAH
PYVAVMLKVADHSGQ	AHSYWLLKRLSRNGA
AVKPPPNKYPIFFFG	KLKREQVKVEQVAME
TRVMKEGKFIDRFSP	VLDQLQDKDPARIFA
NKLITSDKVENFHEE	MDFATMRKRLEAQGY
KAPAPPSKVIKTVTI	LIIDNCMKYNARDTV
NPCKDREKHVLEARN	LDLTCAMKSSGSRSK
TLRHTMEKVVRSAAT	KSSGSRSKRAKLLKK
PQRAALLKSMLNFLK	KRAKLLKKEIALLRN
KFASFIDKVRFLEQQ	EIALLRNKLSQQHSQ
LAILEKIKKNQRQDY	ETLLQPRKRSRSTCG
LGNSKRTKLGEKDLP	VEEESPGKRLDAGLT
IYVLQDNKFRLLTQM	PGGGLGRKATPRRRC
DIMKFICKDFWTTVF	DSSFNAPKCGRGKPA
YSGLIVNKAPHDFQF	IENGNYAKAARIAAE
RTGSKNPKIALKLAE	PLKVVWAKCSGYPSY
RVTILCDKFSGHPKG	PALIIDPKMPRVPGH
KRPYFHVKPLEKAQL	APPLDVLKIGEHMQT
DQVEGIQKSGTKKLK	IGEHMQTKSDEKLFL
DLPLRPRKQATAAGQ	LVLFFDNKRSWQWLP
HCPPAPAKPMHPENK	RSWQWLPKSKMVPLG
VSANQTLKELKIQIM	WQWLPKSKMVPLGID
QAFAPYNKPSLSGAR	GIDETIDKLKMMEGR
YEPVHLYKDVKDSIR	DETIDKLKMMEGRNS
MKVEWAKKAYGLQSD	GRNSSIRKAVRIAFD
KRYPASMKQLQQRSL	QAAYCAPKKEKVAIK
SDMMVLDKQKGLKSL	AAYCAPKKEKVAIKR
QGTFVAHKEIKLTLL	IKRINLEKCQTSMDE
SVKQEFEKQDELKRS	TSMDELLKEIQAMSQ
ETLLPRLKGYLISGS	YYTSFVVKDELWLVM
KPFPTHYKDLWDNKH	DELWLVMKLLSGGSV
DIEVQKMKKAVESLM	GSVLDIIKHIVAKGE
KDAVDLMKALKFKKV	EGLEYLHKNGQIHRD
FHADFIHKHVKGSRL	GGDITRNKVRKTFVG
TIYMGKDKYENEDLI	ITRNKVRKTFVGTPC
RKHVFVEKVLQRLFP	QVRGYDFKADIWSFG
RRRIRKHKSKKKFKN	VQDKEMLKKYGKSFR
IRKHKSKKKFKNPNN	QDKEMLKKYGKSFRK
KRALMMMKFAEKAVD	MISLCLQKDPEKRPT
DNYKKDLKDLKEKVS	AAELLRHKFFQKAKN
GKSSRGLKIYAMEIS	LRHKFFQKAKNKEFL
GKKGNEEKMKEGLED	HKFFQKAKNKEFLQE
GNSHGGKKGNEEKMK	PTISERAKKVRRVPG
GGNSHGGKKGNEEKM	TISERAKKVRRVPGS
NLIWTNDKTTADPFV	GSSGRLHKTEDGGWE
QDGRKMSKKKTAVKR	PPTAEPAKTAQALSS
DGRKMSKKKTAVKRD	VLRLRNSKKELNDIR
FSKLPEVKSTSERFL	SDIPDDGKLIGFAQL
DKQWLFSKLPEVKST	ATLIYVDKENGEPGT
PTLVTASKDGYFKVW	VVAKDGLKLGSGPSI
KNEKSDPKVTLKDDD	ALPKATRKALGTVNR
NEVGGLVKALRLFQE	RATEKSVKTKGPLKQ
KGGDVRDKWDQYKGV	VKTKGPLKQKQPSFS
YENYRRNKSYSFIAR	KQPSFSAKKMTEKTV
ELRNVIDKLAQFVAR	QPSFSAKKMTEKTVK
NNKHSIDKVTSRWIP	TEKTVKAKSSVPASD
PKSSYADKAPSRSLN	DAYPEIEKFFPFNPL
TVTELVTKKKPKAEG	DEERELEKLFQLGPP
DKFYHLAKETGYRSR	GFDQHEQKFTGLPRQ
QRQIEQEKLASMKKQ	EESARRPKPLVDPAC
KTYHAIQKYFSAKSG	SIQPGAPKTIVRGSK
EVKKVLDKFYKRKEI	KTIVRGSKGAKDGAL
QVASRVQKYFIKLTK	TARGGPGKAGSRGRF
PNLYIYSKKSSTSRR	RRRAGPEKRPKSSRE
KLSCGEWKSLVGATY	AGPEKRPKSSREGSG
SREAAQYKKALENET	AGLASGAKLAAGRPF
LAHQELIKQKKDISI	ATVRSSGKLVAVKKM
ISKATGKKISSVLQE	SGKLVAVKKMDLRKQ
GVSSKSMKELKELCK	VKKMDLRKQQRRELL
TWAGVSSKSMKELKE	GVIHRDIKSDSILLT
AVVAVAEKREKLANG	YFNEPPLKAMKMIRD
AAEEAHLKHEFDADL	EPPLKAMKMIRDNLP
NKFECDCKAKWLYLW	PRLKNLHKVSPSLKG
FECDCKAKWLYLWLK	HKVSPSLKGFLDRLL
TTKTEKGKPSREIKK	ATAAELLKHPFLAKA
GGEPWGAKKPRHDLP	IQKHNHSKSTWLILH
REGEGLGKYSQGRKD	TWLILHHKVYDLTKF
VSQKLMAKMGFREGE	LHPDDRPKLNKPPET
YDCCKRQKDAENEFN	DDRPKLNKPPETLIT
DYPVLYGKYLNGLGR	CAISILMKDLADELA
HAGLGTGKPSSFEDV	SLFLRTPKIVSGKDY
KCGKGFAKQCKLTEH	YNVTANSKLVIITAG
SEECLTLKSHRLLTR	VKYSPNCKLLIVSNP
RPCPAAVKSEECLTL	ILTYVAWKISGFPKN
HKCDKCDKGFFHISE	WKISGFPKNRVIGSG
KDRLQELKQRTKEIE	NVAGVSLKTLHPDLG
KHRQQRRKDPEGTPY	DLGTDKDKEQWKEVH
TDDKTLPKLERKRLQ	DKDKEQWKEVHKQVV
QGGGSVTKKRKLEST	ESAYEVIKLKGYTSW
KEVQKLFKRKNNQIE	AYEVIKLKGYTSWAI
IVFKEVQKLFKRKNN	NGISDLVKVTLTSEE
SRPYGSDKPWPSLLD	SEEEARLKKSADTLW
RKQKEVQKENEFYMQ	WHDSVSGKKFPVFNP
NPNMFPFKTAVITVE	HDSVSGKKFPVFNPA
DILSRGPKSMISLAG	CQVEEGDKEDVDKAV
CRYRCSKKERVYVYC	GDKEDVDKAVKAARQ
AAKEGATKFGSQASQ	MESMNGGKLYSNAYL
AALPKAGKFGPARKS	YCAGWADKIQGRTIP
LNNHGKSKTCCENKE	CGNTVVVKPAEQTPL
EILNNHGKSKTCCEN	LHVASLIKEAGFPPG
KDCLKLMKYLLEQLK	SSHMDIDKVAFTGST
LSFSHIEKEILNNHG	TEVGKLIKEAAGKSN
HEASLKRKAEEKLES	LIKEAAGKSNLKRVT
SNLSGQGKHGKKQLD	RSVERAKKYILGNPL
EAEKLNYKDKKLNIG	GGGPWGNKGYFVQPT
NDRAGVSKGYGFVTF	TDEMRIAKEEIFGPV
LDKCSAPKIWRTPNG	VQQIMKFKSLDDVIK
IPQATAAKYPRTIHP	VFTKDIDKAITISSA
NPQYLVEKIIRTRIY	FHEYTEVKTVTVKIS
VILPIKKKHLFENSR	EDDPNFFKMVEGFFD
QQLQGEGKIIDRRPE	SQHRTPCKGGIRYST
FSHYSGLKHEDKRGG	LASLMTYKCAVVDVP
GDTHLFDKVRGYDIK	DVPFGGAKAGVKINP
IRRDGPMKFEKDFDF	AGVKINPKNYTDNEL
FGITGYGKGKERILE	YTDNELEKITRRFTM
TGKTCLLKAMLNLHD	RFTMELAKKGFIGPG
ASKWAAEKLEKSDES	FTMELAKKGFIGPGI
ELAEAASKWAAEKLE	AHACVTGKPISQGGI
GTSDHFTKPSPRADV	ILGFPKAKPYEGSIL
VTKTLGPKPFQLPFR	ASEKQLTKSNAPRVK
DVSYQGGKSIKLSSE	VQESLERKFGKHGGT
LSMETPAKTEEIKLE	NAIEKVFKVYNEAGV
SDKHSPQKKSTVTNE	FLYSLLMKLFQRSTP
QCVSVEPKKKEQENK	PISSDDDKGFVDLVI
EVLSPNSKVESKCET	GFVDLVIKVYFKDTH
TDGAILGKLYKIPEL	LVIKVYFKDTHPKFP
IQPFHFIKDPKNLTL	PKFPAGGKMSQYLES
PSAVCAEKEEKHGKE	GLLVYQGKGKFAIRP
VRHAYVHKPYLYSKY	LVYQGKGKFAIRPDK
SPFLPSMKMQKVMPT	KFAIRPDKKSNPIIR
KFDKLPIKIVKKNNL	FAIRPDKKSNPIIRT
SHPRPSRKPVDSVPL	QVIRAIMKDPDDHTV
TNFNSIAKILAQQTG	LFANQTEKDILLRPE
KTKQIRDKVILLFSK	TKAVCVLKGDGPVQG
AMRKLWSKKLITDDK	GIINFEQKESNGPVK
PSFDGRLKDIDEDFK	KESNGPVKVWGSIKG
QKMNRDNKEGQEPAK	VKVWGSIKGLTEGLH
KEGQEPAKRRSECEE	SRKHGGPKDEERHVG
CNLIFRLKDLDFASL	EKADDLGKGGNEEST
YAHHISSKYDELKKS	DNTLSITKGEKLRVL
RTHKDYVKALAYAKD	LSITKGEKLRVLGYN
[truncated: 875 more rows]
