# Supplementary material for: Systematic analysis of human lysine acetylation proteins and accurate prediction of human lysine acetylation through bi-relative adapted binomial score Bayes feature representation
Source: Royal Society of Chemistry journal article supplement (doi:10.1039/c2mb25251a), 2012-08-13
Supplement: c2mb25251a_3.xlsx [file c2mb25251a_3.xlsx]

## Sheet: Gene list for GO analysis
Input name	Gene name	Description
A0AUZ9	C2orf67	chromosome 2 open reading frame 67 [Source:HGNC Symbol;Acc:26310]
A0AVT1	UBA6	ubiquitin-like modifier activating enzyme 6 [Source:HGNC Symbol;Acc:25581]
A1X283	SH3PXD2B	SH3 and PX domains 2B [Source:HGNC Symbol;Acc:29242]
A2RRP1	NBAS	neuroblastoma amplified sequence [Source:HGNC Symbol;Acc:15625]
A2RUS2	DENND3	DENN/MADD domain containing 3 [Source:HGNC Symbol;Acc:29134]
A3KN83	SBNO1	strawberry notch homolog 1 (Drosophila) [Source:HGNC Symbol;Acc:22973]
A6H8Y1	BDP1	B double prime 1, subunit of RNA polymerase III transcription initiation factor IIIB [Source:HGNC Symbol;Acc:13652]
A6NEC2	RP11-1407O15.2	Puromycin-sensitive aminopeptidase-like protein [Source:UniProtKB/Swiss-Prot;Acc:A6NEC2]
A6NIH7	UNC119B	unc-119 homolog B (C. elegans) [Source:HGNC Symbol;Acc:16488]
A6NKF1	SAC3D1	SAC3 domain containing 1 [Source:HGNC Symbol;Acc:30179]
A6NMY6	ANXA2	annexin A2 [Source:HGNC Symbol;Acc:537]
A7KAX9	ARHGAP32	Rho GTPase activating protein 32 [Source:HGNC Symbol;Acc:17399]
A9Z1Y9
B1ALW1
O00116	AGPS	alkylglycerone phosphate synthase [Source:HGNC Symbol;Acc:327]
O00148	DDX39A	DEAD (Asp-Glu-Ala-Asp) box polypeptide 39A [Source:HGNC Symbol;Acc:17821]
O00154	ACOT7	acyl-CoA thioesterase 7 [Source:HGNC Symbol;Acc:24157]
O00186	STXBP3	syntaxin binding protein 3 [Source:HGNC Symbol;Acc:11446]
O00193	C11orf58	chromosome 11 open reading frame 58 [Source:HGNC Symbol;Acc:16990]
O00203	AP3B1	adaptor-related protein complex 3, beta 1 subunit [Source:HGNC Symbol;Acc:566]
O00232	PSMD12	proteasome (prosome, macropain) 26S subunit, non-ATPase, 12 [Source:HGNC Symbol;Acc:9557]
O00244	ATOX1	ATX1 antioxidant protein 1 homolog (yeast) [Source:HGNC Symbol;Acc:798]
O00257	CBX4	chromobox homolog 4 [Source:HGNC Symbol;Acc:1554]
O00294	TULP1	tubby like protein 1 [Source:HGNC Symbol;Acc:12423]
O00299	CLIC1	chloride intracellular channel 1 [Source:HGNC Symbol;Acc:2062]
O00303	EIF3F	eukaryotic translation initiation factor 3, subunit F [Source:HGNC Symbol;Acc:3275]
O00330	PDHX	pyruvate dehydrogenase complex, component X [Source:HGNC Symbol;Acc:21350]
O00444	PLK4	polo-like kinase 4 [Source:HGNC Symbol;Acc:11397]
O00479	HMGN4	high mobility group nucleosomal binding domain 4 [Source:HGNC Symbol;Acc:4989]
O00541	PES1	pescadillo homolog 1, containing BRCT domain (zebrafish) [Source:HGNC Symbol;Acc:8848]
O00566	MPHOSPH10	M-phase phosphoprotein 10 (U3 small nucleolar ribonucleoprotein) [Source:HGNC Symbol;Acc:7213]
O00567	NOP56	NOP56 ribonucleoprotein homolog (yeast) [Source:HGNC Symbol;Acc:15911]
O00571	DDX3X	DEAD (Asp-Glu-Ala-Asp) box polypeptide 3, X-linked [Source:HGNC Symbol;Acc:2745]
O00635	TRIM38	tripartite motif containing 38 [Source:HGNC Symbol;Acc:10059]
O00716	E2F3	E2F transcription factor 3 [Source:HGNC Symbol;Acc:3115]
O00763	ACACB	acetyl-CoA carboxylase beta [Source:HGNC Symbol;Acc:85]
O14497	ARID1A	AT rich interactive domain 1A (SWI-like) [Source:HGNC Symbol;Acc:11110]
O14548	COX7A2L	cytochrome c oxidase subunit VIIa polypeptide 2 like [Source:HGNC Symbol;Acc:2289]
O14561	NDUFAB1	NADH dehydrogenase (ubiquinone) 1, alpha/beta subcomplex, 1, 8kDa [Source:HGNC Symbol;Acc:7694]
O14578	CIT	citron (rho-interacting, serine/threonine kinase 21) [Source:HGNC Symbol;Acc:1985]
O14654	IRS4	insulin receptor substrate 4 [Source:HGNC Symbol;Acc:6128]
O14734	ACOT8	acyl-CoA thioesterase 8 [Source:HGNC Symbol;Acc:15919]
O14737	PDCD5	programmed cell death 5 [Source:HGNC Symbol;Acc:8764]
O14744	PRMT5	protein arginine methyltransferase 5 [Source:HGNC Symbol;Acc:10894]
O14745	SLC9A3R1	solute carrier family 9 (sodium/hydrogen exchanger), member 3 regulator 1 [Source:HGNC Symbol;Acc:11075]
O14776	TCERG1	transcription elongation regulator 1 [Source:HGNC Symbol;Acc:15630]
O14777	NDC80	NDC80 homolog, kinetochore complex component (S. cerevisiae) [Source:HGNC Symbol;Acc:16909]
O14802	POLR3A	polymerase (RNA) III (DNA directed) polypeptide A, 155kDa [Source:HGNC Symbol;Acc:30074]
O14818	PSMA7	proteasome (prosome, macropain) subunit, alpha type, 7 [Source:HGNC Symbol;Acc:9536]
O14827	RASGRF2	Ras protein-specific guanine nucleotide-releasing factor 2 [Source:HGNC Symbol;Acc:9876]
O14874	BCKDK	branched chain ketoacid dehydrogenase kinase [Source:HGNC Symbol;Acc:16902]
O14964	HGS	hepatocyte growth factor-regulated tyrosine kinase substrate [Source:HGNC Symbol;Acc:4897]
O14972	DSCR3	Down syndrome critical region gene 3 [Source:HGNC Symbol;Acc:3044]
O14979	HNRPDL	heterogeneous nuclear ribonucleoprotein D-like [Source:HGNC Symbol;Acc:5037]
O14980	XPO1	exportin 1 (CRM1 homolog, yeast) [Source:HGNC Symbol;Acc:12825]
O15027	SEC16A	SEC16 homolog A (S. cerevisiae) [Source:HGNC Symbol;Acc:29006]
O15042	U2SURP	U2 snRNP-associated SURP domain containing [Source:HGNC Symbol;Acc:30855]
O15078	CEP290	centrosomal protein 290kDa [Source:HGNC Symbol;Acc:29021]
O15084	ANKRD28	ankyrin repeat domain 28 [Source:HGNC Symbol;Acc:29024]
O15105	SMAD7	SMAD family member 7 [Source:HGNC Symbol;Acc:6773]
O15143	ARPC1B	actin related protein 2/3 complex, subunit 1B, 41kDa [Source:HGNC Symbol;Acc:704]
O15144	ARPC2	actin related protein 2/3 complex, subunit 2, 34kDa [Source:HGNC Symbol;Acc:705]
O15145	ARPC3	actin related protein 2/3 complex, subunit 3, 21kDa [Source:HGNC Symbol;Acc:706]
O15212	PFDN6	prefoldin subunit 6 [Source:HGNC Symbol;Acc:4926]
O15228	GNPAT	glyceronephosphate O-acyltransferase [Source:HGNC Symbol;Acc:4416]
O15265	ATXN7	ataxin 7 [Source:HGNC Symbol;Acc:10560]
O15305	PMM2	phosphomannomutase 2 [Source:HGNC Symbol;Acc:9115]
O15318	POLR3G	polymerase (RNA) III (DNA directed) polypeptide G (32kD) [Source:HGNC Symbol;Acc:30075]
O15347	HMGB3	high mobility group box 3 [Source:HGNC Symbol;Acc:5004]
O15350	TP73	tumor protein p73 [Source:HGNC Symbol;Acc:12003]
O15355	PPM1G	protein phosphatase, Mg2+/Mn2+ dependent, 1G [Source:HGNC Symbol;Acc:9278]
O15440	ABCC5	ATP-binding cassette, sub-family C (CFTR/MRP), member 5 [Source:HGNC Symbol;Acc:56]
O15516	CLOCK	clock homolog (mouse) [Source:HGNC Symbol;Acc:2082]
O15525	MAFG	v-maf musculoaponeurotic fibrosarcoma oncogene homolog G (avian) [Source:HGNC Symbol;Acc:6781]
O15530	PDPK1	3-phosphoinositide dependent protein kinase-1 [Source:HGNC Symbol;Acc:8816]
O43143	DHX15	DEAH (Asp-Glu-Ala-His) box polypeptide 15 [Source:HGNC Symbol;Acc:2738]
O43148	RNMT	RNA (guanine-7-) methyltransferase [Source:HGNC Symbol;Acc:10075]
O43149	ZZEF1	zinc finger, ZZ-type with EF-hand domain 1 [Source:HGNC Symbol;Acc:29027]
O43169	CYB5B	cytochrome b5 type B (outer mitochondrial membrane) [Source:HGNC Symbol;Acc:24374]
O43172	PRPF4	PRP4 pre-mRNA processing factor 4 homolog (yeast) [Source:HGNC Symbol;Acc:17349]
O43242	PSMD3	proteasome (prosome, macropain) 26S subunit, non-ATPase, 3 [Source:HGNC Symbol;Acc:9560]
O43283	MAP3K13	mitogen-activated protein kinase kinase kinase 13 [Source:HGNC Symbol;Acc:6852]
O43298	ZBTB43	zinc finger and BTB domain containing 43 [Source:HGNC Symbol;Acc:17908]
O43324	EEF1E1	eukaryotic translation elongation factor 1 epsilon 1 [Source:HGNC Symbol;Acc:3212]
O43361	ZNF749	zinc finger protein 749 [Source:HGNC Symbol;Acc:32783]
O43390	HNRNPR	heterogeneous nuclear ribonucleoprotein R [Source:HGNC Symbol;Acc:5047]
O43448	KCNAB3	potassium voltage-gated channel, shaker-related subfamily, beta member 3 [Source:HGNC Symbol;Acc:6230]
O43490	PROM1	prominin 1 [Source:HGNC Symbol;Acc:9454]
O43491	EPB41L2	erythrocyte membrane protein band 4.1-like 2 [Source:HGNC Symbol;Acc:3379]
O43592	XPOT	exportin, tRNA (nuclear export receptor for tRNAs) [Source:HGNC Symbol;Acc:12826]
O43602	DCX	doublecortin [Source:HGNC Symbol;Acc:2714]
O43684	BUB3	budding uninhibited by benzimidazoles 3 homolog (yeast) [Source:HGNC Symbol;Acc:1151]
O43707	ACTN4	actinin, alpha 4 [Source:HGNC Symbol;Acc:166]
O43708	GSTZ1	glutathione transferase zeta 1 [Source:HGNC Symbol;Acc:4643]
O43719	HTATSF1	HIV-1 Tat specific factor 1 [Source:HGNC Symbol;Acc:5276]
O43747	AP1G1	adaptor-related protein complex 1, gamma 1 subunit [Source:HGNC Symbol;Acc:555]
O43765	SGTA	small glutamine-rich tetratricopeptide repeat (TPR)-containing, alpha [Source:HGNC Symbol;Acc:10819]
O43768	ENSA	endosulfine alpha [Source:HGNC Symbol;Acc:3360]
O43776	NARS	asparaginyl-tRNA synthetase [Source:HGNC Symbol;Acc:7643]
O43809	NUDT21	nudix (nucleoside diphosphate linked moiety X)-type motif 21 [Source:HGNC Symbol;Acc:13870]
O43813	LANCL1	LanC lantibiotic synthetase component C-like 1 (bacterial) [Source:HGNC Symbol;Acc:6508]
O43815	STRN	striatin, calmodulin binding protein [Source:HGNC Symbol;Acc:11424]
O43823	AKAP8	A kinase (PRKA) anchor protein 8 [Source:HGNC Symbol;Acc:378]
O43837	IDH3B	isocitrate dehydrogenase 3 (NAD+) beta [Source:HGNC Symbol;Acc:5385]
O60218	AKR1B10	aldo-keto reductase family 1, member B10 (aldose reductase) [Source:HGNC Symbol;Acc:382]
O60234	GMFG	glia maturation factor, gamma [Source:HGNC Symbol;Acc:4374]
O60256	PRPSAP2	phosphoribosyl pyrophosphate synthetase-associated protein 2 [Source:HGNC Symbol;Acc:9467]
O60264	SMARCA5	SWI/SNF related, matrix associated, actin dependent regulator of chromatin, subfamily a, member 5 [Source:HGNC Symbol;Acc:11101]
O60281	ZNF292	zinc finger protein 292 [Source:HGNC Symbol;Acc:18410]
O60291	MGRN1	mahogunin, ring finger 1 [Source:HGNC Symbol;Acc:20254]
O60292	SIPA1L3	signal-induced proliferation-associated 1 like 3 [Source:HGNC Symbol;Acc:23801]
O60306	AQR	aquarius homolog (mouse) [Source:HGNC Symbol;Acc:29513]
O60313	OPA1	optic atrophy 1 (autosomal dominant) [Source:HGNC Symbol;Acc:8140]
O60315	ZEB2	zinc finger E-box binding homeobox 2 [Source:HGNC Symbol;Acc:14881]
O60318	MCM3AP	minichromosome maintenance complex component 3 associated protein [Source:HGNC Symbol;Acc:6946]
O60343	TBC1D4	TBC1 domain family, member 4 [Source:HGNC Symbol;Acc:19165]
O60361
O60476	MAN1A2	mannosidase, alpha, class 1A, member 2 [Source:HGNC Symbol;Acc:6822]
O60488	ACSL4	acyl-CoA synthetase long-chain family member 4 [Source:HGNC Symbol;Acc:3571]
O60506	SYNCRIP	synaptotagmin binding, cytoplasmic RNA interacting protein [Source:HGNC Symbol;Acc:16918]
O60522	TDRD6	tudor domain containing 6 [Source:HGNC Symbol;Acc:21339]
O60563	CCNT1	cyclin T1 [Source:HGNC Symbol;Acc:1599]
O60566	BUB1B	budding uninhibited by benzimidazoles 1 homolog beta (yeast) [Source:HGNC Symbol;Acc:1149]
O60645	EXOC3	exocyst complex component 3 [Source:HGNC Symbol;Acc:30378]
O60664	PLIN3	perilipin 3 [Source:HGNC Symbol;Acc:16893]
O60673	REV3L	REV3-like, catalytic subunit of DNA polymerase zeta (yeast) [Source:HGNC Symbol;Acc:9968]
O60675	MAFK	v-maf musculoaponeurotic fibrosarcoma oncogene homolog K (avian) [Source:HGNC Symbol;Acc:6782]
O60701	UGDH	UDP-glucose 6-dehydrogenase [Source:HGNC Symbol;Acc:12525]
O60716	CTNND1	catenin (cadherin-associated protein), delta 1 [Source:HGNC Symbol;Acc:2515]
O60749	SNX2	sorting nexin 2 [Source:HGNC Symbol;Acc:11173]
O60763	USO1	USO1 vesicle docking protein homolog (yeast) [Source:HGNC Symbol;Acc:30904]
O60812	HNRNPCL1	heterogeneous nuclear ribonucleoprotein C-like 1 [Source:HGNC Symbol;Acc:29295]
O60841	EIF5B	eukaryotic translation initiation factor 5B [Source:HGNC Symbol;Acc:30793]
O60869	EDF1	endothelial differentiation-related factor 1 [Source:HGNC Symbol;Acc:3164]
O60879	DIAPH2	diaphanous homolog 2 (Drosophila) [Source:HGNC Symbol;Acc:2877]
O60880	SH2D1A	SH2 domain containing 1A [Source:HGNC Symbol;Acc:10820]
O60885	BRD4	bromodomain containing 4 [Source:HGNC Symbol;Acc:13575]
O60942	RNGTT	RNA guanylyltransferase and 5'-phosphatase [Source:HGNC Symbol;Acc:10073]
O75027	ABCB7	ATP-binding cassette, sub-family B (MDR/TAP), member 7 [Source:HGNC Symbol;Acc:48]
O75044	SRGAP2	SLIT-ROBO Rho GTPase activating protein 2 [Source:HGNC Symbol;Acc:19751]
O75083	WDR1	WD repeat domain 1 [Source:HGNC Symbol;Acc:12754]
O75150	RNF40	ring finger protein 40 [Source:HGNC Symbol;Acc:16867]
O75152	ZC3H11A	zinc finger CCCH-type containing 11A [Source:HGNC Symbol;Acc:29093]
O75323	GBAS	glioblastoma amplified sequence [Source:HGNC Symbol;Acc:4179]
O75347	TBCA	tubulin folding cofactor A [Source:HGNC Symbol;Acc:11579]
O75351	VPS4B	vacuolar protein sorting 4 homolog B (S. cerevisiae) [Source:HGNC Symbol;Acc:10895]
O75365	PTP4A3	protein tyrosine phosphatase type IVA, member 3 [Source:HGNC Symbol;Acc:9636]
O75367	H2AFY	H2A histone family, member Y [Source:HGNC Symbol;Acc:4740]
O75369	FLNB	filamin B, beta [Source:HGNC Symbol;Acc:3755]
O75376	NCOR1	nuclear receptor corepressor 1 [Source:HGNC Symbol;Acc:7672]
O75381	PEX14	peroxisomal biogenesis factor 14 [Source:HGNC Symbol;Acc:8856]
O75390	CS	citrate synthase [Source:HGNC Symbol;Acc:2422]
O75391	SPAG7	sperm associated antigen 7 [Source:HGNC Symbol;Acc:11216]
O75396
O75400	PRPF40A	PRP40 pre-mRNA processing factor 40 homolog A (S. cerevisiae) [Source:HGNC Symbol;Acc:16463]
O75446	SAP30	Sin3A-associated protein, 30kDa [Source:HGNC Symbol;Acc:10532]
O75475	PSIP1	PC4 and SFRS1 interacting protein 1 [Source:HGNC Symbol;Acc:9527]
O75477	ERLIN1	ER lipid raft associated 1 [Source:HGNC Symbol;Acc:16947]
O75496	GMNN	geminin, DNA replication inhibitor [Source:HGNC Symbol;Acc:17493]
O75521	ECI2	enoyl-CoA delta isomerase 2 [Source:HGNC Symbol;Acc:14601]
O75525	KHDRBS3	KH domain containing, RNA binding, signal transduction associated 3 [Source:HGNC Symbol;Acc:18117]
O75528	TADA3	transcriptional adaptor 3 [Source:HGNC Symbol;Acc:19422]
O75531	BANF1	barrier to autointegration factor 1 [Source:HGNC Symbol;Acc:17397]
O75533	SF3B1	splicing factor 3b, subunit 1, 155kDa [Source:HGNC Symbol;Acc:10768]
O75586	MED6	mediator complex subunit 6 [Source:HGNC Symbol;Acc:19970]
O75592	MYCBP2	MYC binding protein 2 [Source:HGNC Symbol;Acc:23386]
O75643	SNRNP200	small nuclear ribonucleoprotein 200kDa (U5) [Source:HGNC Symbol;Acc:30859]
O75663	TIPRL	TIP41, TOR signaling pathway regulator-like (S. cerevisiae) [Source:HGNC Symbol;Acc:30231]
O75689	ADAP1	ArfGAP with dual PH domains 1 [Source:HGNC Symbol;Acc:16486]
O75717	WDHD1	WD repeat and HMG-box DNA binding protein 1 [Source:HGNC Symbol;Acc:23170]
O75791	GRAP2	GRB2-related adaptor protein 2 [Source:HGNC Symbol;Acc:4563]
O75821	EIF3G	eukaryotic translation initiation factor 3, subunit G [Source:HGNC Symbol;Acc:3274]
O75874	IDH1	isocitrate dehydrogenase 1 (NADP+), soluble [Source:HGNC Symbol;Acc:5382]
O75879	PET112	PET112 homolog (yeast) [Source:HGNC Symbol;Acc:8849]
O75891	ALDH1L1	aldehyde dehydrogenase 1 family, member L1 [Source:HGNC Symbol;Acc:3978]
O75916	RGS9	regulator of G-protein signaling 9 [Source:HGNC Symbol;Acc:10004]
O75937	DNAJC8	DnaJ (Hsp40) homolog, subfamily C, member 8 [Source:HGNC Symbol;Acc:15470]
O75940	SMNDC1	survival motor neuron domain containing 1 [Source:HGNC Symbol;Acc:16900]
O75947	ATP5H	ATP synthase, H+ transporting, mitochondrial Fo complex, subunit d [Source:HGNC Symbol;Acc:845]
O75964	ATP5L	ATP synthase, H+ transporting, mitochondrial Fo complex, subunit G [Source:HGNC Symbol;Acc:14247]
O76003	GLRX3	glutaredoxin 3 [Source:HGNC Symbol;Acc:15987]
O76021	RSL1D1	ribosomal L1 domain containing 1 [Source:HGNC Symbol;Acc:24534]
O76031	CLPX	ClpX caseinolytic peptidase X homolog (E. coli) [Source:HGNC Symbol;Acc:2088]
O76041	NEBL	nebulette [Source:HGNC Symbol;Acc:16932]
O94761
O94776	MTA2	metastasis associated 1 family, member 2 [Source:HGNC Symbol;Acc:7411]
O94822	LTN1	listerin E3 ubiquitin protein ligase 1 [Source:HGNC Symbol;Acc:13082]
O94826	TOMM70A	translocase of outer mitochondrial membrane 70 homolog A (S. cerevisiae) [Source:HGNC Symbol;Acc:11985]
O94874	KIAA0776	KIAA0776 [Source:HGNC Symbol;Acc:23039]
O94906	PRPF6	PRP6 pre-mRNA processing factor 6 homolog (S. cerevisiae) [Source:HGNC Symbol;Acc:15860]
O94919	ENDOD1	endonuclease domain containing 1 [Source:HGNC Symbol;Acc:29129]
O94925	GLS	glutaminase [Source:HGNC Symbol;Acc:4331]
O94953	KDM4B	lysine (K)-specific demethylase 4B [Source:HGNC Symbol;Acc:29136]
O94973	AP2A2	adaptor-related protein complex 2, alpha 2 subunit [Source:HGNC Symbol;Acc:562]
O94986	CEP152	centrosomal protein 152kDa [Source:HGNC Symbol;Acc:29298]
O94992	HEXIM1	hexamethylene bis-acetamide inducible 1 [Source:HGNC Symbol;Acc:24953]
O95050	INMT	indolethylamine N-methyltransferase [Source:HGNC Symbol;Acc:6069]
O95081	AGFG2	ArfGAP with FG repeats 2 [Source:HGNC Symbol;Acc:5177]
O95104	SCAF4	SR-related CTD-associated factor 4 [Source:HGNC Symbol;Acc:19304]
O95140	MFN2	mitofusin 2 [Source:HGNC Symbol;Acc:16877]
O95183	VAMP5	vesicle-associated membrane protein 5 (myobrevin) [Source:HGNC Symbol;Acc:12646]
O95202	LETM1	leucine zipper-EF-hand containing transmembrane protein 1 [Source:HGNC Symbol;Acc:6556]
O95232	LUC7L3	LUC7-like 3 (S. cerevisiae) [Source:HGNC Symbol;Acc:24309]
O95249	GOSR1	golgi SNAP receptor complex member 1 [Source:HGNC Symbol;Acc:4430]
O95251	KAT7	K(lysine) acetyltransferase 7 [Source:HGNC Symbol;Acc:17016]
O95336	PGLS	6-phosphogluconolactonase [Source:HGNC Symbol;Acc:8903]
O95347	SMC2	structural maintenance of chromosomes 2 [Source:HGNC Symbol;Acc:14011]
O95352	ATG7	ATG7 autophagy related 7 homolog (S. cerevisiae) [Source:HGNC Symbol;Acc:16935]
O95359	TACC2	transforming, acidic coiled-coil containing protein 2 [Source:HGNC Symbol;Acc:11523]
O95363	FARS2	phenylalanyl-tRNA synthetase 2, mitochondrial [Source:HGNC Symbol;Acc:21062]
O95402	MED26	mediator complex subunit 26 [Source:HGNC Symbol;Acc:2376]
O95433	AHSA1	AHA1, activator of heat shock 90kDa protein ATPase homolog 1 (yeast) [Source:HGNC Symbol;Acc:1189]
O95453	PARN	poly(A)-specific ribonuclease [Source:HGNC Symbol;Acc:8609]
O95456	PSMG1	proteasome (prosome, macropain) assembly chaperone 1 [Source:HGNC Symbol;Acc:3043]
O95470	SGPL1	sphingosine-1-phosphate lyase 1 [Source:HGNC Symbol;Acc:10817]
O95571	ETHE1	ethylmalonic encephalopathy 1 [Source:HGNC Symbol;Acc:23287]
O95721	SNAP29	synaptosomal-associated protein, 29kDa [Source:HGNC Symbol;Acc:11133]
O95749	GGPS1	geranylgeranyl diphosphate synthase 1 [Source:HGNC Symbol;Acc:4249]
O95758	ROD1	ROD1 regulator of differentiation 1 (S. pombe) [Source:HGNC Symbol;Acc:10253]
O95780	ZNF682	zinc finger protein 682 [Source:HGNC Symbol;Acc:28857]
O95786	DDX58	DEAD (Asp-Glu-Ala-Asp) box polypeptide 58 [Source:HGNC Symbol;Acc:19102]
O95793	STAU1	staufen, RNA binding protein, homolog 1 (Drosophila) [Source:HGNC Symbol;Acc:11370]
O95801	TTC4	tetratricopeptide repeat domain 4 [Source:HGNC Symbol;Acc:12394]
O95816	BAG2	BCL2-associated athanogene 2 [Source:HGNC Symbol;Acc:938]
O95831	AIFM1	apoptosis-inducing factor, mitochondrion-associated, 1 [Source:HGNC Symbol;Acc:8768]
O95983	MBD3	methyl-CpG binding domain protein 3 [Source:HGNC Symbol;Acc:6918]
O96011	PEX11B	peroxisomal biogenesis factor 11 beta [Source:HGNC Symbol;Acc:8853]
O96028	WHSC1	Wolf-Hirschhorn syndrome candidate 1 [Source:HGNC Symbol;Acc:12766]
P00167	CYB5A	cytochrome b5 type A (microsomal) [Source:HGNC Symbol;Acc:2570]
P00325	ADH1B	alcohol dehydrogenase 1B (class I), beta polypeptide [Source:HGNC Symbol;Acc:250]
P00338	LDHA	lactate dehydrogenase A [Source:HGNC Symbol;Acc:6535]
P00352	ALDH1A1	aldehyde dehydrogenase 1 family, member A1 [Source:HGNC Symbol;Acc:402]
P00367	GLUD1	glutamate dehydrogenase 1 [Source:HGNC Symbol;Acc:4335]
P00387	CYB5R3	cytochrome b5 reductase 3 [Source:HGNC Symbol;Acc:2873]
P00390	GSR	glutathione reductase [Source:HGNC Symbol;Acc:4623]
P00441	SOD1	superoxide dismutase 1, soluble [Source:HGNC Symbol;Acc:11179]
P00451	F8	coagulation factor VIII, procoagulant component [Source:HGNC Symbol;Acc:3546]
P00480	OTC	ornithine carbamoyltransferase [Source:HGNC Symbol;Acc:8512]
P00491	PNP	purine nucleoside phosphorylase [Source:HGNC Symbol;Acc:7892]
P00505	GOT2	glutamic-oxaloacetic transaminase 2, mitochondrial (aspartate aminotransferase 2) [Source:HGNC Symbol;Acc:4433]
P00519	ABL1	c-abl oncogene 1, non-receptor tyrosine kinase [Source:HGNC Symbol;Acc:76]
P00558	PGK1	phosphoglycerate kinase 1 [Source:HGNC Symbol;Acc:8896]
P00813	ADA	adenosine deaminase [Source:HGNC Symbol;Acc:186]
P00966	ASS1	argininosuccinate synthase 1 [Source:HGNC Symbol;Acc:758]
P01009	SERPINA1	serpin peptidase inhibitor, clade A (alpha-1 antiproteinase, antitrypsin), member 1 [Source:HGNC Symbol;Acc:8941]
P01106	MYC	v-myc myelocytomatosis viral oncogene homolog (avian) [Source:HGNC Symbol;Acc:7553]
P01213	PDYN	prodynorphin [Source:HGNC Symbol;Acc:8820]
P02461	COL3A1	collagen, type III, alpha 1 [Source:HGNC Symbol;Acc:2201]
P02545	LMNA	lamin A/C [Source:HGNC Symbol;Acc:6636]
P02549	SPTA1	spectrin, alpha, erythrocytic 1 (elliptocytosis 2) [Source:HGNC Symbol;Acc:11272]
P02768	ALB	albumin [Source:HGNC Symbol;Acc:399]
P02786	TFRC	transferrin receptor (p90, CD71) [Source:HGNC Symbol;Acc:11763]
P02787	TF	transferrin [Source:HGNC Symbol;Acc:11740]
P03372	ESR1	estrogen receptor 1 [Source:HGNC Symbol;Acc:3467]
P03928	J01415.25	ATP synthase protein 8 [Source:UniProtKB/Swiss-Prot;Acc:P03928]
P04040	CAT	catalase [Source:HGNC Symbol;Acc:1516]
P04075	ALDOA	aldolase A, fructose-bisphosphate [Source:HGNC Symbol;Acc:414]
P04080	CSTB	cystatin B (stefin B) [Source:HGNC Symbol;Acc:2482]
P04083	ANXA1	annexin A1 [Source:HGNC Symbol;Acc:533]
P04114	APOB	apolipoprotein B (including Ag(x) antigen) [Source:HGNC Symbol;Acc:603]
P04179	SOD2	superoxide dismutase 2, mitochondrial [Source:HGNC Symbol;Acc:11180]
P04406	GAPDH	glyceraldehyde-3-phosphate dehydrogenase [Source:HGNC Symbol;Acc:4141]
P04424	ASL	argininosuccinate lyase [Source:HGNC Symbol;Acc:746]
P04585
P04632	CAPNS2	calpain, small subunit 2 [Source:HGNC Symbol;Acc:16371]
P04637	TP53	tumor protein p53 [Source:HGNC Symbol;Acc:11998]
P04792	HSPB1	heat shock 27kDa protein 1 [Source:HGNC Symbol;Acc:5246]
P04843	RPN1	ribophorin I [Source:HGNC Symbol;Acc:10381]
P04908	HIST1H2AB	histone cluster 1, H2ab [Source:HGNC Symbol;Acc:4734]
P05062	ALDOB	aldolase B, fructose-bisphosphate [Source:HGNC Symbol;Acc:417]
P05089	ARG1	arginase, liver [Source:HGNC Symbol;Acc:663]
P05091	ALDH2	aldehyde dehydrogenase 2 family (mitochondrial) [Source:HGNC Symbol;Acc:404]
P05114	HMGN1	high mobility group nucleosome binding domain 1 [Source:HGNC Symbol;Acc:4984]
P05141	SLC25A5	solute carrier family 25 (mitochondrial carrier; adenine nucleotide translocator), member 5 [Source:HGNC Symbol;Acc:10991]
P05165	PCCA	propionyl CoA carboxylase, alpha polypeptide [Source:HGNC Symbol;Acc:8653]
P05166	PCCB	propionyl CoA carboxylase, beta polypeptide [Source:HGNC Symbol;Acc:8654]
P05198	EIF2S1	eukaryotic translation initiation factor 2, subunit 1 alpha, 35kDa [Source:HGNC Symbol;Acc:3265]
P05387	RPLP2	ribosomal protein, large, P2 [Source:HGNC Symbol;Acc:10377]
P05388	RPLP0	ribosomal protein, large, P0 [Source:HGNC Symbol;Acc:10371]
P05412	JUN	jun proto-oncogene [Source:HGNC Symbol;Acc:6204]
P05455	SSB	Sjogren syndrome antigen B (autoantigen La) [Source:HGNC Symbol;Acc:11316]
P05783	KRT18	keratin 18 [Source:HGNC Symbol;Acc:6430]
P05787	KRT8	keratin 8 [Source:HGNC Symbol;Acc:6446]
P06239	LCK	lymphocyte-specific protein tyrosine kinase [Source:HGNC Symbol;Acc:6524]
P06396	GSN	gelsolin [Source:HGNC Symbol;Acc:4620]
P06400	RB1	retinoblastoma 1 [Source:HGNC Symbol;Acc:9884]
P06454	PTMA	prothymosin, alpha [Source:HGNC Symbol;Acc:9623]
P06493	CDK1	cyclin-dependent kinase 1 [Source:HGNC Symbol;Acc:1722]
P06576	ATP5B	ATP synthase, H+ transporting, mitochondrial F1 complex, beta polypeptide [Source:HGNC Symbol;Acc:830]
P06703	S100A6	S100 calcium binding protein A6 [Source:HGNC Symbol;Acc:10496]
P06733	ENO1	enolase 1, (alpha) [Source:HGNC Symbol;Acc:3350]
P06737	PYGL	phosphorylase, glycogen, liver [Source:HGNC Symbol;Acc:9725]
P06744	GPI	glucose-6-phosphate isomerase [Source:HGNC Symbol;Acc:4458]
P06746	POLB	polymerase (DNA directed), beta [Source:HGNC Symbol;Acc:9174]
P06748	NPM1	nucleophosmin (nucleolar phosphoprotein B23, numatrin) [Source:HGNC Symbol;Acc:7910]
P06753	TPM3	tropomyosin 3 [Source:HGNC Symbol;Acc:12012]
P07099	EPHX1	epoxide hydrolase 1, microsomal (xenobiotic) [Source:HGNC Symbol;Acc:3401]
P07108	DBI	diazepam binding inhibitor (GABA receptor modulator, acyl-CoA binding protein) [Source:HGNC Symbol;Acc:2690]
P07148	FABP1	fatty acid binding protein 1, liver [Source:HGNC Symbol;Acc:3555]
P07195	LDHB	lactate dehydrogenase B [Source:HGNC Symbol;Acc:6541]
P07205	PGK2	phosphoglycerate kinase 2 [Source:HGNC Symbol;Acc:8898]
P07237	P4HB	prolyl 4-hydroxylase, beta polypeptide [Source:HGNC Symbol;Acc:8548]
P07384	CAPN1	calpain 1, (mu/I) large subunit [Source:HGNC Symbol;Acc:1476]
P07437	TUBB	tubulin, beta [Source:HGNC Symbol;Acc:20778]
P07451	CA3	carbonic anhydrase III, muscle specific [Source:HGNC Symbol;Acc:1374]
P07737	PFN1	profilin 1 [Source:HGNC Symbol;Acc:8881]
P07741	APRT	adenine phosphoribosyltransferase [Source:HGNC Symbol;Acc:626]
P07814	EPRS	glutamyl-prolyl-tRNA synthetase [Source:HGNC Symbol;Acc:3418]
P07864	LDHC	lactate dehydrogenase C [Source:HGNC Symbol;Acc:6544]
P07900	HSP90AA1	heat shock protein 90kDa alpha (cytosolic), class A member 1 [Source:HGNC Symbol;Acc:5253]
P07910	HNRNPC	heterogeneous nuclear ribonucleoprotein C (C1/C2) [Source:HGNC Symbol;Acc:5035]
P07954	FH	fumarate hydratase [Source:HGNC Symbol;Acc:3700]
P08047	SP1	Sp1 transcription factor [Source:HGNC Symbol;Acc:11205]
P08069	IGF1R	insulin-like growth factor 1 receptor [Source:HGNC Symbol;Acc:5465]
P08107	HSPA1A	heat shock 70kDa protein 1A [Source:HGNC Symbol;Acc:5232]
P08133	ANXA6	annexin A6 [Source:HGNC Symbol;Acc:544]
P08237	PFKM	phosphofructokinase, muscle [Source:HGNC Symbol;Acc:8877]
P08238	HSP90AB1	heat shock protein 90kDa alpha (cytosolic), class B member 1 [Source:HGNC Symbol;Acc:5258]
P08243	ASNS	asparagine synthetase (glutamine-hydrolyzing) [Source:HGNC Symbol;Acc:753]
P08263	GSTA1	glutathione S-transferase alpha 1 [Source:HGNC Symbol;Acc:4626]
P08319	ADH4	alcohol dehydrogenase 4 (class II), pi polypeptide [Source:HGNC Symbol;Acc:252]
P08397	HMBS	hydroxymethylbilane synthase [Source:HGNC Symbol;Acc:4982]
P08559	PDHA1	pyruvate dehydrogenase (lipoamide) alpha 1 [Source:HGNC Symbol;Acc:8806]
P08567	PLEK	pleckstrin [Source:HGNC Symbol;Acc:9070]
P08575	PTPRC	protein tyrosine phosphatase, receptor type, C [Source:HGNC Symbol;Acc:9666]
P08621	SNRNP70	small nuclear ribonucleoprotein 70kDa (U1) [Source:HGNC Symbol;Acc:11150]
P08670	VIM	vimentin [Source:HGNC Symbol;Acc:12692]
P08684	CYP3A4	cytochrome P450, family 3, subfamily A, polypeptide 4 [Source:HGNC Symbol;Acc:2637]
P08708	RPS17	ribosomal protein S17 [Source:HGNC Symbol;Acc:10397]
P08758	ANXA5	annexin A5 [Source:HGNC Symbol;Acc:543]
P09012	SNRPA	small nuclear ribonucleoprotein polypeptide A [Source:HGNC Symbol;Acc:11151]
P09104	ENO2	enolase 2 (gamma, neuronal) [Source:HGNC Symbol;Acc:3353]
P09211	GSTP1	glutathione S-transferase pi 1 [Source:HGNC Symbol;Acc:4638]
P09238	MMP10	matrix metallopeptidase 10 (stromelysin 2) [Source:HGNC Symbol;Acc:7156]
P09382	LGALS1	lectin, galactoside-binding, soluble, 1 [Source:HGNC Symbol;Acc:6561]
P09429	HMGB1	high mobility group box 1 [Source:HGNC Symbol;Acc:4983]
P09467	FBP1	fructose-1,6-bisphosphatase 1 [Source:HGNC Symbol;Acc:3606]
P09488	GSTM1	glutathione S-transferase mu 1 [Source:HGNC Symbol;Acc:4632]
P09493	TPM1	tropomyosin 1 (alpha) [Source:HGNC Symbol;Acc:12010]
P09601	HMOX1	heme oxygenase (decycling) 1 [Source:HGNC Symbol;Acc:5013]
P09622	DLD	dihydrolipoamide dehydrogenase [Source:HGNC Symbol;Acc:2898]
P09630	HOXC6	homeobox C6 [Source:HGNC Symbol;Acc:5128]
P09651	HNRNPA1	heterogeneous nuclear ribonucleoprotein A1 [Source:HGNC Symbol;Acc:5031]
P09661	SNRPA1	small nuclear ribonucleoprotein polypeptide A' [Source:HGNC Symbol;Acc:11152]
P09871	C1S	complement component 1, s subcomponent [Source:HGNC Symbol;Acc:1247]
P09874	PARP1	poly (ADP-ribose) polymerase 1 [Source:HGNC Symbol;Acc:270]
P09884	POLA1	polymerase (DNA directed), alpha 1, catalytic subunit [Source:HGNC Symbol;Acc:9173]
P09936	UCHL1	ubiquitin carboxyl-terminal esterase L1 (ubiquitin thiolesterase) [Source:HGNC Symbol;Acc:12513]
P09960	LTA4H	leukotriene A4 hydrolase [Source:HGNC Symbol;Acc:6710]
P0C0S5	H2AFZ	H2A histone family, member Z [Source:HGNC Symbol;Acc:4741]
P0C0S8	HIST1H2AG	histone cluster 1, H2ag [Source:HGNC Symbol;Acc:4737]
P10155	TROVE2	TROVE domain family, member 2 [Source:HGNC Symbol;Acc:11313]
P10242	MYB	v-myb myeloblastosis viral oncogene homolog (avian) [Source:HGNC Symbol;Acc:7545]
P10243	MYBL1	v-myb myeloblastosis viral oncogene homolog (avian)-like 1 [Source:HGNC Symbol;Acc:7547]
P10275	AR	androgen receptor [Source:HGNC Symbol;Acc:644]
P10412	HIST1H1E	histone cluster 1, H1e [Source:HGNC Symbol;Acc:4718]
P10599	TXN	thioredoxin [Source:HGNC Symbol;Acc:12435]
P10606	COX5B	cytochrome c oxidase subunit Vb [Source:HGNC Symbol;Acc:2269]
P10636	MAPT	microtubule-associated protein tau [Source:HGNC Symbol;Acc:6893]
P10646	TFPI	tissue factor pathway inhibitor (lipoprotein-associated coagulation inhibitor) [Source:HGNC Symbol;Acc:11760]
P10768	ESD	esterase D [Source:HGNC Symbol;Acc:3465]
P10809	HSPD1	heat shock 60kDa protein 1 (chaperonin) [Source:HGNC Symbol;Acc:5261]
P10911	MCF2	MCF.2 cell line derived transforming sequence [Source:HGNC Symbol;Acc:6940]
P11021	HSPA5	heat shock 70kDa protein 5 (glucose-regulated protein, 78kDa) [Source:HGNC Symbol;Acc:5238]
P11142	HSPA8	heat shock 70kDa protein 8 [Source:HGNC Symbol;Acc:5241]
P11171	EPB41	erythrocyte membrane protein band 4.1 (elliptocytosis 1, RH-linked) [Source:HGNC Symbol;Acc:3377]
P11172	UMPS	uridine monophosphate synthetase [Source:HGNC Symbol;Acc:12563]
P11182	DBT	dihydrolipoamide branched chain transacylase E2 [Source:HGNC Symbol;Acc:2698]
P11216	PYGB	phosphorylase, glycogen; brain [Source:HGNC Symbol;Acc:9723]
P11217	PYGM	phosphorylase, glycogen, muscle [Source:HGNC Symbol;Acc:9726]
P11362	FGFR1	fibroblast growth factor receptor 1 [Source:HGNC Symbol;Acc:3688]
P11387	TOP1	topoisomerase (DNA) I [Source:HGNC Symbol;Acc:11986]
P11413	G6PD	glucose-6-phosphate dehydrogenase [Source:HGNC Symbol;Acc:4057]
P11498	PC	pyruvate carboxylase [Source:HGNC Symbol;Acc:8636]
P11586	MTHFD1	methylenetetrahydrofolate dehydrogenase (NADP+ dependent) 1, methenyltetrahydrofolate cyclohydrolase, formyltetrahydrofolate synthetase [Source:HGNC Symbol;Acc:7432]
P11712	CYP2C9	cytochrome P450, family 2, subfamily C, polypeptide 9 [Source:HGNC Symbol;Acc:2623]
P11717	IGF2R	insulin-like growth factor 2 receptor [Source:HGNC Symbol;Acc:5467]
P11766	ADH5	alcohol dehydrogenase 5 (class III), chi polypeptide [Source:HGNC Symbol;Acc:253]
P11940	PABPC1	poly(A) binding protein, cytoplasmic 1 [Source:HGNC Symbol;Acc:8554]
P12004	PCNA	proliferating cell nuclear antigen [Source:HGNC Symbol;Acc:8729]
P12081	HARS	histidyl-tRNA synthetase [Source:HGNC Symbol;Acc:4816]
P12235	SLC25A4	solute carrier family 25 (mitochondrial carrier; adenine nucleotide translocator), member 4 [Source:HGNC Symbol;Acc:10990]
P12236	SLC25A6	solute carrier family 25 (mitochondrial carrier; adenine nucleotide translocator), member 6 [Source:HGNC Symbol;Acc:10992]
P12268	IMPDH2	IMP (inosine 5'-monophosphate) dehydrogenase 2 [Source:HGNC Symbol;Acc:6053]
P12270	TPR	translocated promoter region (to activated MET oncogene) [Source:HGNC Symbol;Acc:12017]
P12524	MYCL1	v-myc myelocytomatosis viral oncogene homolog 1, lung carcinoma derived (avian) [Source:HGNC Symbol;Acc:7555]
P12755	SKI	v-ski sarcoma viral oncogene homolog (avian) [Source:HGNC Symbol;Acc:10896]
P12882	MYH1	myosin, heavy chain 1, skeletal muscle, adult [Source:HGNC Symbol;Acc:7567]
P12956	XRCC6	X-ray repair complementing defective repair in Chinese hamster cells 6 [Source:HGNC Symbol;Acc:4055]
P13010	XRCC5	X-ray repair complementing defective repair in Chinese hamster cells 5 (double-strand-break rejoining) [Source:HGNC Symbol;Acc:12833]
P13051	UNG	uracil-DNA glycosylase [Source:HGNC Symbol;Acc:12572]
P13073	COX4I1	cytochrome c oxidase subunit IV isoform 1 [Source:HGNC Symbol;Acc:2265]
P13639	EEF2	eukaryotic translation elongation factor 2 [Source:HGNC Symbol;Acc:3214]
P13640	MT1G	metallothionein 1G [Source:HGNC Symbol;Acc:7399]
P13645	KRT10	keratin 10 [Source:HGNC Symbol;Acc:6413]
P13667	PDIA4	protein disulfide isomerase family A, member 4 [Source:HGNC Symbol;Acc:30167]
P13796	LCP1	lymphocyte cytosolic protein 1 (L-plastin) [Source:HGNC Symbol;Acc:6528]
P13804	ETFA	electron-transfer-flavoprotein, alpha polypeptide [Source:HGNC Symbol;Acc:3481]
P13984	GTF2F2	general transcription factor IIF, polypeptide 2, 30kDa [Source:HGNC Symbol;Acc:4653]
P13995	MTHFD2	methylenetetrahydrofolate dehydrogenase (NADP+ dependent) 2, methenyltetrahydrofolate cyclohydrolase [Source:HGNC Symbol;Acc:7434]
P14174	MIF	macrophage migration inhibitory factor (glycosylation-inhibiting factor) [Source:HGNC Symbol;Acc:7097]
P14316	IRF2	interferon regulatory factor 2 [Source:HGNC Symbol;Acc:6117]
P14317	HCLS1	hematopoietic cell-specific Lyn substrate 1 [Source:HGNC Symbol;Acc:4844]
P14324	FDPS	farnesyl diphosphate synthase [Source:HGNC Symbol;Acc:3631]
P14618	PKM2	pyruvate kinase, muscle [Source:HGNC Symbol;Acc:9021]
P14635	CCNB1	cyclin B1 [Source:HGNC Symbol;Acc:1579]
P14649	MYL6B	myosin, light chain 6B, alkali, smooth muscle and non-muscle [Source:HGNC Symbol;Acc:29823]
P14735	IDE	insulin-degrading enzyme [Source:HGNC Symbol;Acc:5381]
P14866	HNRNPL	heterogeneous nuclear ribonucleoprotein L [Source:HGNC Symbol;Acc:5045]
P14868	DARS	aspartyl-tRNA synthetase [Source:HGNC Symbol;Acc:2678]
P14921	ETS1	v-ets erythroblastosis virus E26 oncogene homolog 1 (avian) [Source:HGNC Symbol;Acc:3488]
P14927	UQCRB	ubiquinol-cytochrome c reductase binding protein [Source:HGNC Symbol;Acc:12582]
P15056	BRAF	v-raf murine sarcoma viral oncogene homolog B1 [Source:HGNC Symbol;Acc:1097]
P15121	AKR1B1	aldo-keto reductase family 1, member B1 (aldose reductase) [Source:HGNC Symbol;Acc:381]
P15153	RAC2	ras-related C3 botulinum toxin substrate 2 (rho family, small GTP binding protein Rac2) [Source:HGNC Symbol;Acc:9802]
P15170	GSPT1	G1 to S phase transition 1 [Source:HGNC Symbol;Acc:4621]
P15172	MYOD1	myogenic differentiation 1 [Source:HGNC Symbol;Acc:7611]
P15311	EZR	ezrin [Source:HGNC Symbol;Acc:12691]
P15336	ATF2	activating transcription factor 2 [Source:HGNC Symbol;Acc:784]
P15498	VAV1	vav 1 guanine nucleotide exchange factor [Source:HGNC Symbol;Acc:12657]
P15559	NQO1	NAD(P)H dehydrogenase, quinone 1 [Source:HGNC Symbol;Acc:2874]
P15692	VEGFA	vascular endothelial growth factor A [Source:HGNC Symbol;Acc:12680]
P15924	DSP	desmoplakin [Source:HGNC Symbol;Acc:3052]
P15976	GATA1	GATA binding protein 1 (globin transcription factor 1) [Source:HGNC Symbol;Acc:4170]
P16104	H2AFX	H2A histone family, member X [Source:HGNC Symbol;Acc:4739]
P16219	ACADS	acyl-CoA dehydrogenase, C-2 to C-3 short chain [Source:HGNC Symbol;Acc:90]
P16220	CREB1	cAMP responsive element binding protein 1 [Source:HGNC Symbol;Acc:2345]
P16401	HIST1H1B	histone cluster 1, H1b [Source:HGNC Symbol;Acc:4719]
P16402	HIST1H1D	histone cluster 1, H1d [Source:HGNC Symbol;Acc:4717]
P16403	HIST1H1C	histone cluster 1, H1c [Source:HGNC Symbol;Acc:4716]
P16615	ATP2A2	ATPase, Ca++ transporting, cardiac muscle, slow twitch 2 [Source:HGNC Symbol;Acc:812]
P16930	FAH	fumarylacetoacetate hydrolase (fumarylacetoacetase) [Source:HGNC Symbol;Acc:3579]
P16949	STMN1	stathmin 1 [Source:HGNC Symbol;Acc:6510]
P16989	CSDA	cold shock domain protein A [Source:HGNC Symbol;Acc:2428]
P17017	ZNF14	zinc finger protein 14 [Source:HGNC Symbol;Acc:12924]
P17025	ZNF182	zinc finger protein 182 [Source:HGNC Symbol;Acc:13001]
P17030	ZNF25	zinc finger protein 25 [Source:HGNC Symbol;Acc:13043]
P17096	HMGA1	high mobility group AT-hook 1 [Source:HGNC Symbol;Acc:5010]
P17174	GOT1	glutamic-oxaloacetic transaminase 1, soluble (aspartate aminotransferase 1) [Source:HGNC Symbol;Acc:4432]
P17252	PRKCA	protein kinase C, alpha [Source:HGNC Symbol;Acc:9393]
P17542	TAL1	T-cell acute lymphocytic leukemia 1 [Source:HGNC Symbol;Acc:11556]
P17612	PRKACA	protein kinase, cAMP-dependent, catalytic, alpha [Source:HGNC Symbol;Acc:9380]
P17661	DES	desmin [Source:HGNC Symbol;Acc:2770]
P17676	CEBPB	CCAAT/enhancer binding protein (C/EBP), beta [Source:HGNC Symbol;Acc:1834]
P17706	PTPN2	protein tyrosine phosphatase, non-receptor type 2 [Source:HGNC Symbol;Acc:9650]
P17735	TAT	tyrosine aminotransferase [Source:HGNC Symbol;Acc:11573]
P17812	CTPS	CTP synthase [Source:HGNC Symbol;Acc:2519]
P17844	DDX5	DEAD (Asp-Glu-Ala-Asp) box polypeptide 5 [Source:HGNC Symbol;Acc:2746]
P17858	PFKL	phosphofructokinase, liver [Source:HGNC Symbol;Acc:8876]
P17987	TCP1	t-complex 1 [Source:HGNC Symbol;Acc:11655]
P18206	VCL	vinculin [Source:HGNC Symbol;Acc:12665]
P18583	SON	SON DNA binding protein [Source:HGNC Symbol;Acc:11183]
P18669	PGAM1	phosphoglycerate mutase 1 (brain) [Source:HGNC Symbol;Acc:8888]
P18848	ATF4	activating transcription factor 4 (tax-responsive enhancer element B67) [Source:HGNC Symbol;Acc:786]
P18859	ATP5J	ATP synthase, H+ transporting, mitochondrial Fo complex, subunit F6 [Source:HGNC Symbol;Acc:847]
P19338	NCL	nucleolin [Source:HGNC Symbol;Acc:7667]
P19784	CSNK2A2	casein kinase 2, alpha prime polypeptide [Source:HGNC Symbol;Acc:2459]
P19793	RXRA	retinoid X receptor, alpha [Source:HGNC Symbol;Acc:10477]
P19838	NFKB1	nuclear factor of kappa light polypeptide gene enhancer in B-cells 1 [Source:HGNC Symbol;Acc:7794]
P20042	EIF2S2	eukaryotic translation initiation factor 2, subunit 2 beta, 38kDa [Source:HGNC Symbol;Acc:3266]
P20073	ANXA7	annexin A7 [Source:HGNC Symbol;Acc:545]
P20248	CCNA2	cyclin A2 [Source:HGNC Symbol;Acc:1578]
P20618	PSMB1	proteasome (prosome, macropain) subunit, beta type, 1 [Source:HGNC Symbol;Acc:9537]
P20700	LMNB1	lamin B1 [Source:HGNC Symbol;Acc:6637]
P20815	CYP3A5	cytochrome P450, family 3, subfamily A, polypeptide 5 [Source:HGNC Symbol;Acc:2638]
P20908	COL5A1	collagen, type V, alpha 1 [Source:HGNC Symbol;Acc:2209]
P20962	PTMS	parathymosin [Source:HGNC Symbol;Acc:9629]
P21127	CDK11A	cyclin-dependent kinase 11A [Source:HGNC Symbol;Acc:1730]
P21291	CSRP1	cysteine and glycine-rich protein 1 [Source:HGNC Symbol;Acc:2469]
P21333	FLNA	filamin A, alpha [Source:HGNC Symbol;Acc:3754]
P21359	NF1	neurofibromin 1 [Source:HGNC Symbol;Acc:7765]
P21397	MAOA	monoamine oxidase A [Source:HGNC Symbol;Acc:6833]
P21439	ABCB4	ATP-binding cassette, sub-family B (MDR/TAP), member 4 [Source:HGNC Symbol;Acc:45]
P21579	SYT1	synaptotagmin I [Source:HGNC Symbol;Acc:11509]
P21796	VDAC1	voltage-dependent anion channel 1 [Source:HGNC Symbol;Acc:12669]
P21953	BCKDHB	branched chain keto acid dehydrogenase E1, beta polypeptide [Source:HGNC Symbol;Acc:987]
P22059	OSBP	oxysterol binding protein [Source:HGNC Symbol;Acc:8503]
P22087	FBL	fibrillarin [Source:HGNC Symbol;Acc:3599]
P22102	GART	phosphoribosylglycinamide formyltransferase, phosphoribosylglycinamide synthetase, phosphoribosylaminoimidazole synthetase [Source:HGNC Symbol;Acc:4163]
P22234	PAICS	phosphoribosylaminoimidazole carboxylase, phosphoribosylaminoimidazole succinocarboxamide synthetase [Source:HGNC Symbol;Acc:8587]
P22307	SCP2	sterol carrier protein 2 [Source:HGNC Symbol;Acc:10606]
P22314	UBA1	ubiquitin-like modifier activating enzyme 1 [Source:HGNC Symbol;Acc:12469]
P22626	HNRNPA2B1	heterogeneous nuclear ribonucleoprotein A2/B1 [Source:HGNC Symbol;Acc:5033]
P22681	CBL	Cas-Br-M (murine) ecotropic retroviral transforming sequence [Source:HGNC Symbol;Acc:1541]
P22830	FECH	ferrochelatase [Source:HGNC Symbol;Acc:3647]
P23141	CES1	carboxylesterase 1 [Source:HGNC Symbol;Acc:1863]
P23193	TCEA1	transcription elongation factor A (SII), 1 [Source:HGNC Symbol;Acc:11612]
P23246	SFPQ	splicing factor proline/glutamine-rich [Source:HGNC Symbol;Acc:10774]
P23284	PPIB	peptidylprolyl isomerase B (cyclophilin B) [Source:HGNC Symbol;Acc:9255]
P23368	ME2	malic enzyme 2, NAD(+)-dependent, mitochondrial [Source:HGNC Symbol;Acc:6984]
P23381	WARS	tryptophanyl-tRNA synthetase [Source:HGNC Symbol;Acc:12729]
P23396	RPS3	ribosomal protein S3 [Source:HGNC Symbol;Acc:10420]
P23443	RPS6KB1	ribosomal protein S6 kinase, 70kDa, polypeptide 1 [Source:HGNC Symbol;Acc:10436]
P23497	SP100	SP100 nuclear antigen [Source:HGNC Symbol;Acc:11206]
P23508	MCC	mutated in colorectal cancers [Source:HGNC Symbol;Acc:6935]
P23511	NFYA	nuclear transcription factor Y, alpha [Source:HGNC Symbol;Acc:7804]
P23526	AHCY	adenosylhomocysteinase [Source:HGNC Symbol;Acc:343]
P23528	CFL1	cofilin 1 (non-muscle) [Source:HGNC Symbol;Acc:1874]
P23588	EIF4B	eukaryotic translation initiation factor 4B [Source:HGNC Symbol;Acc:3285]
P23743	DGKA	diacylglycerol kinase, alpha 80kDa [Source:HGNC Symbol;Acc:2849]
P23769	GATA2	GATA binding protein 2 [Source:HGNC Symbol;Acc:4171]
P23771	GATA3	GATA binding protein 3 [Source:HGNC Symbol;Acc:4172]
P23786	CPT2	carnitine palmitoyltransferase 2 [Source:HGNC Symbol;Acc:2330]
P23919	DTYMK	deoxythymidylate kinase (thymidylate kinase) [Source:HGNC Symbol;Acc:3061]
P23921	RRM1	ribonucleotide reductase M1 [Source:HGNC Symbol;Acc:10451]
P24534	EEF1B2	eukaryotic translation elongation factor 1 beta 2 [Source:HGNC Symbol;Acc:3208]
P24539	ATP5F1	ATP synthase, H+ transporting, mitochondrial Fo complex, subunit B1 [Source:HGNC Symbol;Acc:840]
P24752	ACAT1	acetyl-CoA acetyltransferase 1 [Source:HGNC Symbol;Acc:93]
P24928	SLC35G6	solute carrier family 35, member G6 [Source:HGNC Symbol;Acc:31351]
P24941	CDK2	cyclin-dependent kinase 2 [Source:HGNC Symbol;Acc:1771]
P25205	MCM3	minichromosome maintenance complex component 3 [Source:HGNC Symbol;Acc:6945]
P25685	DNAJB1	DnaJ (Hsp40) homolog, subfamily B, member 1 [Source:HGNC Symbol;Acc:5270]
P25705	ATP5A1	ATP synthase, H+ transporting, mitochondrial F1 complex, alpha subunit 1, cardiac muscle [Source:HGNC Symbol;Acc:823]
P25787	PSMA2	proteasome (prosome, macropain) subunit, alpha type, 2 [Source:HGNC Symbol;Acc:9531]
P25788	PSMA3	proteasome (prosome, macropain) subunit, alpha type, 3 [Source:HGNC Symbol;Acc:9532]
P25789	PSMA4	proteasome (prosome, macropain) subunit, alpha type, 4 [Source:HGNC Symbol;Acc:9533]
P26038	MSN	moesin [Source:HGNC Symbol;Acc:7373]
P26358	DNMT1	DNA (cytosine-5-)-methyltransferase 1 [Source:HGNC Symbol;Acc:2976]
P26373	RPL13	ribosomal protein L13 [Source:HGNC Symbol;Acc:10303]
P26447	S100A4	S100 calcium binding protein A4 [Source:HGNC Symbol;Acc:10494]
P26583	HMGB2	high mobility group box 2 [Source:HGNC Symbol;Acc:5000]
P26639	TARS	threonyl-tRNA synthetase [Source:HGNC Symbol;Acc:11572]
P26640	VARS	valyl-tRNA synthetase [Source:HGNC Symbol;Acc:12651]
P26641	EEF1G	eukaryotic translation elongation factor 1 gamma [Source:HGNC Symbol;Acc:3213]
P27144	AK4	adenylate kinase 4 [Source:HGNC Symbol;Acc:363]
P27348	YWHAQ	tyrosine 3-monooxygenase/tryptophan 5-monooxygenase activation protein, theta polypeptide [Source:HGNC Symbol;Acc:12854]
P27694	RPA1	replication protein A1, 70kDa [Source:HGNC Symbol;Acc:10289]
P27695	APEX1	APEX nuclease (multifunctional DNA repair enzyme) 1 [Source:HGNC Symbol;Acc:587]
P27708	CAD	carbamoyl-phosphate synthetase 2, aspartate transcarbamylase, and dihydroorotase [Source:HGNC Symbol;Acc:1424]
P27797	CALR	calreticulin [Source:HGNC Symbol;Acc:1455]
P27824	CANX	calnexin [Source:HGNC Symbol;Acc:1473]
P27986	PIK3R1	phosphoinositide-3-kinase, regulatory subunit 1 (alpha) [Source:HGNC Symbol;Acc:8979]
P28065	PSMB9	proteasome (prosome, macropain) subunit, beta type, 9 (large multifunctional peptidase 2) [Source:HGNC Symbol;Acc:9546]
P28161	GSTM2	glutathione S-transferase mu 2 (muscle) [Source:HGNC Symbol;Acc:4634]
P28288	ABCD3	ATP-binding cassette, sub-family D (ALD), member 3 [Source:HGNC Symbol;Acc:67]
P28328	PEX2	peroxisomal biogenesis factor 2 [Source:HGNC Symbol;Acc:9717]
P28330	ACADL	acyl-CoA dehydrogenase, long chain [Source:HGNC Symbol;Acc:88]
P28331	NDUFS1	NADH dehydrogenase (ubiquinone) Fe-S protein 1, 75kDa (NADH-coenzyme Q reductase) [Source:HGNC Symbol;Acc:7707]
P28370	SMARCA1	SWI/SNF related, matrix associated, actin dependent regulator of chromatin, subfamily a, member 1 [Source:HGNC Symbol;Acc:11097]
P28562	DUSP1	dual specificity phosphatase 1 [Source:HGNC Symbol;Acc:3064]
P28838	LAP3	leucine aminopeptidase 3 [Source:HGNC Symbol;Acc:18449]
P29083	GTF2E1	general transcription factor IIE, polypeptide 1, alpha 56kDa [Source:HGNC Symbol;Acc:4650]
P29084	GTF2E2	general transcription factor IIE, polypeptide 2, beta 34kDa [Source:HGNC Symbol;Acc:4651]
P29144	TPP2	tripeptidyl peptidase II [Source:HGNC Symbol;Acc:12016]
P29218	IMPA1	inositol(myo)-1(or 4)-monophosphatase 1 [Source:HGNC Symbol;Acc:6050]
P29350	PTPN6	protein tyrosine phosphatase, non-receptor type 6 [Source:HGNC Symbol;Acc:9658]
P29374	ARID4A	AT rich interactive domain 4A (RBP1-like) [Source:HGNC Symbol;Acc:9885]
P29401	TKT	transketolase [Source:HGNC Symbol;Acc:11834]
P29728	OAS2	2'-5'-oligoadenylate synthetase 2, 69/71kDa [Source:HGNC Symbol;Acc:8087]
P30038	ALDH4A1	aldehyde dehydrogenase 4 family, member A1 [Source:HGNC Symbol;Acc:406]
P30041	PRDX6	peroxiredoxin 6 [Source:HGNC Symbol;Acc:16753]
P30042	C21orf33	chromosome 21 open reading frame 33 [Source:HGNC Symbol;Acc:1273]
P30044	PRDX5	peroxiredoxin 5 [Source:HGNC Symbol;Acc:9355]
P30048	PRDX3	peroxiredoxin 3 [Source:HGNC Symbol;Acc:9354]
P30050	RPL12	ribosomal protein L12 [Source:HGNC Symbol;Acc:10302]
P30084	ECHS1	enoyl CoA hydratase, short chain, 1, mitochondrial [Source:HGNC Symbol;Acc:3151]
P30085	CMPK1	cytidine monophosphate (UMP-CMP) kinase 1, cytosolic [Source:HGNC Symbol;Acc:18170]
P30101	PDIA3	protein disulfide isomerase family A, member 3 [Source:HGNC Symbol;Acc:4606]
P30153	PPP2R1A	protein phosphatase 2, regulatory subunit A, alpha [Source:HGNC Symbol;Acc:9302]
P30405	PPIF	peptidylprolyl isomerase F [Source:HGNC Symbol;Acc:9259]
P30533	LRPAP1	low density lipoprotein receptor-related protein associated protein 1 [Source:HGNC Symbol;Acc:6701]
P30566	ADSL	adenylosuccinate lyase [Source:HGNC Symbol;Acc:291]
P30613	PKLR	pyruvate kinase, liver and RBC [Source:HGNC Symbol;Acc:9020]
P30740	SERPINB1	serpin peptidase inhibitor, clade B (ovalbumin), member 1 [Source:HGNC Symbol;Acc:3311]
P30837	ALDH1B1	aldehyde dehydrogenase 1 family, member B1 [Source:HGNC Symbol;Acc:407]
P30838	ALDH3A1	aldehyde dehydrogenase 3 family, member A1 [Source:HGNC Symbol;Acc:405]
P30876	POLR2B	polymerase (RNA) II (DNA directed) polypeptide B, 140kDa [Source:HGNC Symbol;Acc:9188]
P31040	SDHA	succinate dehydrogenase complex, subunit A, flavoprotein (Fp) [Source:HGNC Symbol;Acc:10680]
P31146	CORO1A	coronin, actin binding protein, 1A [Source:HGNC Symbol;Acc:2252]
P31153	MAT2A	methionine adenosyltransferase II, alpha [Source:HGNC Symbol;Acc:6904]
P31314	TLX1	T-cell leukemia homeobox 1 [Source:HGNC Symbol;Acc:5056]
P31327	CPS1	carbamoyl-phosphate synthase 1, mitochondrial [Source:HGNC Symbol;Acc:2323]
P31513	FMO3	flavin containing monooxygenase 3 [Source:HGNC Symbol;Acc:3771]
P31689	DNAJA1	DnaJ (Hsp40) homolog, subfamily A, member 1 [Source:HGNC Symbol;Acc:5229]
P31930	UQCRC1	ubiquinol-cytochrome c reductase core protein I [Source:HGNC Symbol;Acc:12585]
P31939	ATIC	5-aminoimidazole-4-carboxamide ribonucleotide formyltransferase/IMP cyclohydrolase [Source:HGNC Symbol;Acc:794]
P31946	YWHAB	tyrosine 3-monooxygenase/tryptophan 5-monooxygenase activation protein, beta polypeptide [Source:HGNC Symbol;Acc:12849]
P31947	SFN	stratifin [Source:HGNC Symbol;Acc:10773]
P31948	STIP1	stress-induced-phosphoprotein 1 [Source:HGNC Symbol;Acc:11387]
P32004	L1CAM	L1 cell adhesion molecule [Source:HGNC Symbol;Acc:6470]
P32121	ARRB2	arrestin, beta 2 [Source:HGNC Symbol;Acc:712]
P32298	GRK4	G protein-coupled receptor kinase 4 [Source:HGNC Symbol;Acc:4543]
P32969	RPL9	ribosomal protein L9 [Source:HGNC Symbol;Acc:10369]
P33076	CIITA	class II, major histocompatibility complex, transactivator [Source:HGNC Symbol;Acc:7067]
P33176	KIF5B	kinesin family member 5B [Source:HGNC Symbol;Acc:6324]
P33241	LSP1	lymphocyte-specific protein 1 [Source:HGNC Symbol;Acc:6707]
P33316	DUT	deoxyuridine triphosphatase [Source:HGNC Symbol;Acc:3078]
P33778	HIST1H2BB	histone cluster 1, H2bb [Source:HGNC Symbol;Acc:4751]
P33991	MCM4	minichromosome maintenance complex component 4 [Source:HGNC Symbol;Acc:6947]
P33992	MCM5	minichromosome maintenance complex component 5 [Source:HGNC Symbol;Acc:6948]
P34897	SHMT2	serine hydroxymethyltransferase 2 (mitochondrial) [Source:HGNC Symbol;Acc:10852]
P34913	EPHX2	epoxide hydrolase 2, cytoplasmic [Source:HGNC Symbol;Acc:3402]
P34932	HSPA4	heat shock 70kDa protein 4 [Source:HGNC Symbol;Acc:5237]
P35221	CTNNA1	catenin (cadherin-associated protein), alpha 1, 102kDa [Source:HGNC Symbol;Acc:2509]
P35222	CTNNB1	catenin (cadherin-associated protein), beta 1, 88kDa [Source:HGNC Symbol;Acc:2514]
P35232	PHB	prohibitin [Source:HGNC Symbol;Acc:8912]
P35240	NF2	neurofibromin 2 (merlin) [Source:HGNC Symbol;Acc:7773]
P35241	RDX	radixin [Source:HGNC Symbol;Acc:9944]
P35249	RFC4	replication factor C (activator 1) 4, 37kDa [Source:HGNC Symbol;Acc:9972]
P35250	RFC2	replication factor C (activator 1) 2, 40kDa [Source:HGNC Symbol;Acc:9970]
P35251	RFC1	replication factor C (activator 1) 1, 145kDa [Source:HGNC Symbol;Acc:9969]
P35269	GTF2F1	general transcription factor IIF, polypeptide 1, 74kDa [Source:HGNC Symbol;Acc:4652]
P35558	PCK1	phosphoenolpyruvate carboxykinase 1 (soluble) [Source:HGNC Symbol;Acc:8724]
P35568	IRS1	insulin receptor substrate 1 [Source:HGNC Symbol;Acc:6125]
P35579	MYH9	myosin, heavy chain 9, non-muscle [Source:HGNC Symbol;Acc:7579]
P35580	MYH10	myosin, heavy chain 10, non-muscle [Source:HGNC Symbol;Acc:7568]
P35606	COPB2	coatomer protein complex, subunit beta 2 (beta prime) [Source:HGNC Symbol;Acc:2232]
P35659	DEK	DEK oncogene [Source:HGNC Symbol;Acc:2768]
P35663	CYLC1	cylicin, basic protein of sperm head cytoskeleton 1 [Source:HGNC Symbol;Acc:2582]
P35914	HMGCL	3-hydroxymethyl-3-methylglutaryl-CoA lyase [Source:HGNC Symbol;Acc:5005]
P35998	PSMC2	proteasome (prosome, macropain) 26S subunit, ATPase, 2 [Source:HGNC Symbol;Acc:9548]
P36542	ATP5C1	ATP synthase, H+ transporting, mitochondrial F1 complex, gamma polypeptide 1 [Source:HGNC Symbol;Acc:833]
P36578	RPL4	ribosomal protein L4 [Source:HGNC Symbol;Acc:10353]
P36871	PGM1	phosphoglucomutase 1 [Source:HGNC Symbol;Acc:8905]
P36873	PPP1CC	protein phosphatase 1, catalytic subunit, gamma isozyme [Source:HGNC Symbol;Acc:9283]
P36956	SREBF1	sterol regulatory element binding transcription factor 1 [Source:HGNC Symbol;Acc:11289]
P36957	DLST	dihydrolipoamide S-succinyltransferase (E2 component of 2-oxo-glutarate complex) [Source:HGNC Symbol;Acc:2911]
P36969	GPX4	glutathione peroxidase 4 (phospholipid hydroperoxidase) [Source:HGNC Symbol;Acc:4556]
P37059	HSD17B2	hydroxysteroid (17-beta) dehydrogenase 2 [Source:HGNC Symbol;Acc:5211]
P37802	TAGLN2	transgelin 2 [Source:HGNC Symbol;Acc:11554]
P37837	TALDO1	transaldolase 1 [Source:HGNC Symbol;Acc:11559]
P38117	ETFB	electron-transfer-flavoprotein, beta polypeptide [Source:HGNC Symbol;Acc:3482]
P38159	RBMX	RNA binding motif protein, X-linked [Source:HGNC Symbol;Acc:9910]
P38606	ATP6V1A	ATPase, H+ transporting, lysosomal 70kDa, V1 subunit A [Source:HGNC Symbol;Acc:851]
P38646	HSPA9	heat shock 70kDa protein 9 (mortalin) [Source:HGNC Symbol;Acc:5244]
P38919	EIF4A3	eukaryotic translation initiation factor 4A3 [Source:HGNC Symbol;Acc:18683]
P39019	RPS19	ribosomal protein S19 [Source:HGNC Symbol;Acc:10402]
P39023	RPL3	ribosomal protein L3 [Source:HGNC Symbol;Acc:10332]
P39687	ANP32A	acidic (leucine-rich) nuclear phosphoprotein 32 family, member A [Source:HGNC Symbol;Acc:13233]
P39748	FEN1	flap structure-specific endonuclease 1 [Source:HGNC Symbol;Acc:3650]
P40227	CCT6A	chaperonin containing TCP1, subunit 6A (zeta 1) [Source:HGNC Symbol;Acc:1620]
P40261	NNMT	nicotinamide N-methyltransferase [Source:HGNC Symbol;Acc:7861]
P40429	RPL13A	ribosomal protein L13a [Source:HGNC Symbol;Acc:10304]
P40763	STAT3	signal transducer and activator of transcription 3 (acute-phase response factor) [Source:HGNC Symbol;Acc:11364]
P40818	USP8	ubiquitin specific peptidase 8 [Source:HGNC Symbol;Acc:12631]
P40925	MDH1	malate dehydrogenase 1, NAD (soluble) [Source:HGNC Symbol;Acc:6970]
P40926	MDH2	malate dehydrogenase 2, NAD (mitochondrial) [Source:HGNC Symbol;Acc:6971]
P40938	RFC3	replication factor C (activator 1) 3, 38kDa [Source:HGNC Symbol;Acc:9971]
P40939	HADHA	hydroxyacyl-CoA dehydrogenase/3-ketoacyl-CoA thiolase/enoyl-CoA hydratase (trifunctional protein), alpha subunit [Source:HGNC Symbol;Acc:4801]
P41162	ETV3	ets variant 3 [Source:HGNC Symbol;Acc:3492]
P41212	ETV6	ets variant 6 [Source:HGNC Symbol;Acc:3495]
P41214	EIF2D	eukaryotic translation initiation factor 2D [Source:HGNC Symbol;Acc:6583]
P41223	BUD31	BUD31 homolog (S. cerevisiae) [Source:HGNC Symbol;Acc:29629]
P41250	GARS	glycyl-tRNA synthetase [Source:HGNC Symbol;Acc:4162]
P41252	IARS	isoleucyl-tRNA synthetase [Source:HGNC Symbol;Acc:5330]
P41567	EIF1	eukaryotic translation initiation factor 1 [Source:HGNC Symbol;Acc:3249]
P42126	ECI1	enoyl-CoA delta isomerase 1 [Source:HGNC Symbol;Acc:2703]
P42166	TMPO	thymopoietin [Source:HGNC Symbol;Acc:11875]
P42167	TMPO	thymopoietin [Source:HGNC Symbol;Acc:11875]
P42224	STAT1	signal transducer and activator of transcription 1, 91kDa [Source:HGNC Symbol;Acc:11362]
P42229	STAT5A	signal transducer and activator of transcription 5A [Source:HGNC Symbol;Acc:11366]
P42285	SKIV2L2	superkiller viralicidic activity 2-like 2 (S. cerevisiae) [Source:HGNC Symbol;Acc:18734]
P42345	MTOR	mechanistic target of rapamycin (serine/threonine kinase) [Source:HGNC Symbol;Acc:3942]
P42356	PI4KA	phosphatidylinositol 4-kinase, catalytic, alpha [Source:HGNC Symbol;Acc:8983]
P42357	HAL	histidine ammonia-lyase [Source:HGNC Symbol;Acc:4806]
P42574	CASP3	caspase 3, apoptosis-related cysteine peptidase [Source:HGNC Symbol;Acc:1504]
P42704	LRPPRC	leucine-rich PPR-motif containing [Source:HGNC Symbol;Acc:15714]
P42766	RPL35	ribosomal protein L35 [Source:HGNC Symbol;Acc:10344]
P43034	PAFAH1B1	platelet-activating factor acetylhydrolase 1b, regulatory subunit 1 (45kDa) [Source:HGNC Symbol;Acc:8574]
P43155	CRAT	carnitine O-acetyltransferase [Source:HGNC Symbol;Acc:2342]
P43246	MSH2	mutS homolog 2, colon cancer, nonpolyposis type 1 (E. coli) [Source:HGNC Symbol;Acc:7325]
P43304	GPD2	glycerol-3-phosphate dehydrogenase 2 (mitochondrial) [Source:HGNC Symbol;Acc:4456]
P43403	ZAP70	zeta-chain (TCR) associated protein kinase 70kDa [Source:HGNC Symbol;Acc:12858]
P43487	RANBP1	RAN binding protein 1 [Source:HGNC Symbol;Acc:9847]
P43686	PSMC4	proteasome (prosome, macropain) 26S subunit, ATPase, 4 [Source:HGNC Symbol;Acc:9551]
P43694	GATA4	GATA binding protein 4 [Source:HGNC Symbol;Acc:4173]
P45880	VDAC2	voltage-dependent anion channel 2 [Source:HGNC Symbol;Acc:12672]
P45954	ACADSB	acyl-CoA dehydrogenase, short/branched chain [Source:HGNC Symbol;Acc:91]
P45974	USP5	ubiquitin specific peptidase 5 (isopeptidase T) [Source:HGNC Symbol;Acc:12628]
P45983	MAPK8	mitogen-activated protein kinase 8 [Source:HGNC Symbol;Acc:6881]
P45984	MAPK9	mitogen-activated protein kinase 9 [Source:HGNC Symbol;Acc:6886]
P46013	MKI67	antigen identified by monoclonal antibody Ki-67 [Source:HGNC Symbol;Acc:7107]
P46059	SLC15A1	solute carrier family 15 (oligopeptide transporter), member 1 [Source:HGNC Symbol;Acc:10920]
P46060	RANGAP1	Ran GTPase activating protein 1 [Source:HGNC Symbol;Acc:9854]
P46063	RECQL	RecQ protein-like (DNA helicase Q1-like) [Source:HGNC Symbol;Acc:9948]
P46087	NOP2	NOP2 nucleolar protein homolog (yeast) [Source:HGNC Symbol;Acc:7867]
P46100	ATRX	alpha thalassemia/mental retardation syndrome X-linked [Source:HGNC Symbol;Acc:886]
P46379	BAG6	BCL2-associated athanogene 6 [Source:HGNC Symbol;Acc:13919]
P46777	RPL5	ribosomal protein L5 [Source:HGNC Symbol;Acc:10360]
P46779	RPL28	ribosomal protein L28 [Source:HGNC Symbol;Acc:10330]
P46781	RPS9	ribosomal protein S9 [Source:HGNC Symbol;Acc:10442]
P46782	RPS5	ribosomal protein S5 [Source:HGNC Symbol;Acc:10426]
P46821	MAP1B	microtubule-associated protein 1B [Source:HGNC Symbol;Acc:6836]
P46926	GNPDA1	glucosamine-6-phosphate deaminase 1 [Source:HGNC Symbol;Acc:4417]
P47755	CAPZA2	capping protein (actin filament) muscle Z-line, alpha 2 [Source:HGNC Symbol;Acc:1490]
P47897	QARS	glutaminyl-tRNA synthetase [Source:HGNC Symbol;Acc:9751]
P48047	ATP5O	ATP synthase, H+ transporting, mitochondrial F1 complex, O subunit [Source:HGNC Symbol;Acc:850]
P48147	PREP	prolyl endopeptidase [Source:HGNC Symbol;Acc:9358]
P48163	ME1	malic enzyme 1, NADP(+)-dependent, cytosolic [Source:HGNC Symbol;Acc:6983]
P48426	PIP4K2A	phosphatidylinositol-5-phosphate 4-kinase, type II, alpha [Source:HGNC Symbol;Acc:8997]
P48444	ARCN1	archain 1 [Source:HGNC Symbol;Acc:649]
P48507	GCLM	glutamate-cysteine ligase, modifier subunit [Source:HGNC Symbol;Acc:4312]
P48551	IFNAR2	interferon (alpha, beta and omega) receptor 2 [Source:HGNC Symbol;Acc:5433]
P48552	NRIP1	nuclear receptor interacting protein 1 [Source:HGNC Symbol;Acc:8001]
P48634	PRRC2A	proline-rich coiled-coil 2A [Source:HGNC Symbol;Acc:13918]
P48643	CCT5	chaperonin containing TCP1, subunit 5 (epsilon) [Source:HGNC Symbol;Acc:1618]
P48735	IDH2	isocitrate dehydrogenase 2 (NADP+), mitochondrial [Source:HGNC Symbol;Acc:5383]
P48739	PITPNB	phosphatidylinositol transfer protein, beta [Source:HGNC Symbol;Acc:9002]
P48788	TNNI2	troponin I type 2 (skeletal, fast) [Source:HGNC Symbol;Acc:11946]
P49069	CAMLG	calcium modulating ligand [Source:HGNC Symbol;Acc:1471]
P49189	ALDH9A1	aldehyde dehydrogenase 9 family, member A1 [Source:HGNC Symbol;Acc:412]
P49207	RPL34	ribosomal protein L34 [Source:HGNC Symbol;Acc:10340]
P49321	NASP	nuclear autoantigenic sperm protein (histone-binding) [Source:HGNC Symbol;Acc:7644]
P49327	FASN	fatty acid synthase [Source:HGNC Symbol;Acc:3594]
P49368	CCT3	chaperonin containing TCP1, subunit 3 (gamma) [Source:HGNC Symbol;Acc:1616]
P49411	TUFM	Tu translation elongation factor, mitochondrial [Source:HGNC Symbol;Acc:12420]
P49418	AMPH	amphiphysin [Source:HGNC Symbol;Acc:471]
P49448	GLUD2	glutamate dehydrogenase 2 [Source:HGNC Symbol;Acc:4336]
P49454
P49458	SRP9	signal recognition particle 9kDa [Source:HGNC Symbol;Acc:11304]
P49588	AARS	alanyl-tRNA synthetase [Source:HGNC Symbol;Acc:20]
P49590	HARS2	histidyl-tRNA synthetase 2, mitochondrial (putative) [Source:HGNC Symbol;Acc:4817]
P49711	CTCF	CCCTC-binding factor (zinc finger protein) [Source:HGNC Symbol;Acc:13723]
P49720	PSMB3	proteasome (prosome, macropain) subunit, beta type, 3 [Source:HGNC Symbol;Acc:9540]
P49721	PSMB2	proteasome (prosome, macropain) subunit, beta type, 2 [Source:HGNC Symbol;Acc:9539]
P49736	MCM2	minichromosome maintenance complex component 2 [Source:HGNC Symbol;Acc:6944]
P49748	ACADVL	acyl-CoA dehydrogenase, very long chain [Source:HGNC Symbol;Acc:92]
P49753	ACOT2	acyl-CoA thioesterase 2 [Source:HGNC Symbol;Acc:18431]
P49754	VPS41	vacuolar protein sorting 41 homolog (S. cerevisiae) [Source:HGNC Symbol;Acc:12713]
P49773	HINT1	histidine triad nucleotide binding protein 1 [Source:HGNC Symbol;Acc:4912]
P49790	NUP153	nucleoporin 153kDa [Source:HGNC Symbol;Acc:8062]
P49792	RANBP2	RAN binding protein 2 [Source:HGNC Symbol;Acc:9848]
P49888	SULT1E1	sulfotransferase family 1E, estrogen-preferring, member 1 [Source:HGNC Symbol;Acc:11377]
P49903	SEPHS1	selenophosphate synthetase 1 [Source:HGNC Symbol;Acc:19685]
P49915	GMPS	guanine monphosphate synthetase [Source:HGNC Symbol;Acc:4378]
P49916	LIG3	ligase III, DNA, ATP-dependent [Source:HGNC Symbol;Acc:6600]
P49959	MRE11A	MRE11 meiotic recombination 11 homolog A (S. cerevisiae) [Source:HGNC Symbol;Acc:7230]
P50148	GNAQ	guanine nucleotide binding protein (G protein), q polypeptide [Source:HGNC Symbol;Acc:4390]
P50213	IDH3A	isocitrate dehydrogenase 3 (NAD+) alpha [Source:HGNC Symbol;Acc:5384]
P50225	SULT1A1	sulfotransferase family, cytosolic, 1A, phenol-preferring, member 1 [Source:HGNC Symbol;Acc:11453]
P50238	CRIP1	cysteine-rich protein 1 (intestinal) [Source:HGNC Symbol;Acc:2360]
P50395	GDI2	GDP dissociation inhibitor 2 [Source:HGNC Symbol;Acc:4227]
P50440	GATM	glycine amidinotransferase (L-arginine:glycine amidinotransferase) [Source:HGNC Symbol;Acc:4175]
P50502	ST13	suppression of tumorigenicity 13 (colon carcinoma) (Hsp70 interacting protein) [Source:HGNC Symbol;Acc:11343]
P50549	ETV1	ets variant 1 [Source:HGNC Symbol;Acc:3490]
P50552	VASP	vasodilator-stimulated phosphoprotein [Source:HGNC Symbol;Acc:12652]
P50570	DNM2	dynamin 2 [Source:HGNC Symbol;Acc:2974]
P50579	METAP2	methionyl aminopeptidase 2 [Source:HGNC Symbol;Acc:16672]
P50748	KNTC1	kinetochore associated 1 [Source:HGNC Symbol;Acc:17255]
P50750	CDK9	cyclin-dependent kinase 9 [Source:HGNC Symbol;Acc:1780]
P50851	LRBA	LPS-responsive vesicle trafficking, beach and anchor containing [Source:HGNC Symbol;Acc:1742]
P50990	CCT8	chaperonin containing TCP1, subunit 8 (theta) [Source:HGNC Symbol;Acc:1623]
P50991	CCT4	chaperonin containing TCP1, subunit 4 (delta) [Source:HGNC Symbol;Acc:1617]
P50995	ANXA11	annexin A11 [Source:HGNC Symbol;Acc:535]
P51114	FXR1	fragile X mental retardation, autosomal homolog 1 [Source:HGNC Symbol;Acc:4023]
P51398	DAP3	death associated protein 3 [Source:HGNC Symbol;Acc:2673]
P51531	SMARCA2	SWI/SNF related, matrix associated, actin dependent regulator of chromatin, subfamily a, member 2 [Source:HGNC Symbol;Acc:11098]
P51572	BCAP31	B-cell receptor-associated protein 31 [Source:HGNC Symbol;Acc:16695]
P51580	TPMT	thiopurine S-methyltransferase [Source:HGNC Symbol;Acc:12014]
P51608	MECP2	methyl CpG binding protein 2 (Rett syndrome) [Source:HGNC Symbol;Acc:6990]
P51649	ALDH5A1	aldehyde dehydrogenase 5 family, member A1 [Source:HGNC Symbol;Acc:408]
P51659	HSD17B4	hydroxysteroid (17-beta) dehydrogenase 4 [Source:HGNC Symbol;Acc:5213]
P51665	PSMD7	proteasome (prosome, macropain) 26S subunit, non-ATPase, 7 [Source:HGNC Symbol;Acc:9565]
P51784	USP11	ubiquitin specific peptidase 11 [Source:HGNC Symbol;Acc:12609]
P51828	ADCY7	adenylate cyclase 7 [Source:HGNC Symbol;Acc:238]
P51858	HDGF	hepatoma-derived growth factor [Source:HGNC Symbol;Acc:4856]
P51991	HNRNPA3	heterogeneous nuclear ribonucleoprotein A3 [Source:HGNC Symbol;Acc:24941]
P52272	HNRNPM	heterogeneous nuclear ribonucleoprotein M [Source:HGNC Symbol;Acc:5046]
P52292	KPNA2	karyopherin alpha 2 (RAG cohort 1, importin alpha 1) [Source:HGNC Symbol;Acc:6395]
P52565	ARHGDIA	Rho GDP dissociation inhibitor (GDI) alpha [Source:HGNC Symbol;Acc:678]
P52566	ARHGDIB	Rho GDP dissociation inhibitor (GDI) beta [Source:HGNC Symbol;Acc:679]
P52597	HNRNPF	heterogeneous nuclear ribonucleoprotein F [Source:HGNC Symbol;Acc:5039]
P52630	STAT2	signal transducer and activator of transcription 2, 113kDa [Source:HGNC Symbol;Acc:11363]
P52655	GTF2A1	general transcription factor IIA, 1, 19/37kDa [Source:HGNC Symbol;Acc:4646]
P52701	MSH6	mutS homolog 6 (E. coli) [Source:HGNC Symbol;Acc:7329]
P52732	KIF11	kinesin family member 11 [Source:HGNC Symbol;Acc:6388]
P52756	RBM5	RNA binding motif protein 5 [Source:HGNC Symbol;Acc:9902]
P52758	HRSP12	heat-responsive protein 12 [Source:HGNC Symbol;Acc:16897]
P52849	NDST2	N-deacetylase/N-sulfotransferase (heparan glucosaminyl) 2 [Source:HGNC Symbol;Acc:7681]
P52888	THOP1	thimet oligopeptidase 1 [Source:HGNC Symbol;Acc:11793]
P52895	AKR1C2	aldo-keto reductase family 1, member C2 (dihydrodiol dehydrogenase 2; bile acid binding protein; 3-alpha hydroxysteroid dehydrogenase, type III) [Source:HGNC Symbol;Acc:385]
P52907	CAPZA1	capping protein (actin filament) muscle Z-line, alpha 1 [Source:HGNC Symbol;Acc:1488]
P52943	CRIP2	cysteine-rich protein 2 [Source:HGNC Symbol;Acc:2361]
P52948	NUP98	nucleoporin 98kDa [Source:HGNC Symbol;Acc:8068]
P53004	BLVRA	biliverdin reductase A [Source:HGNC Symbol;Acc:1062]
P53007	SLC25A1	solute carrier family 25 (mitochondrial carrier; citrate transporter), member 1 [Source:HGNC Symbol;Acc:10979]
P53041	PPP5C	protein phosphatase 5, catalytic subunit [Source:HGNC Symbol;Acc:9322]
P53396	ACLY	ATP citrate lyase [Source:HGNC Symbol;Acc:115]
P53675	CLTCL1	clathrin, heavy chain-like 1 [Source:HGNC Symbol;Acc:2093]
P53804	TTC3	tetratricopeptide repeat domain 3 [Source:HGNC Symbol;Acc:12393]
P53999	SUB1	SUB1 homolog (S. cerevisiae) [Source:HGNC Symbol;Acc:19985]
P54132	BLM	Bloom syndrome, RecQ helicase-like [Source:HGNC Symbol;Acc:1058]
P54136	RARS	arginyl-tRNA synthetase [Source:HGNC Symbol;Acc:9870]
P54277	PMS1	PMS1 postmeiotic segregation increased 1 (S. cerevisiae) [Source:HGNC Symbol;Acc:9121]
P54577	YARS	tyrosyl-tRNA synthetase [Source:HGNC Symbol;Acc:12840]
P54707	ATP12A	ATPase, H+/K+ transporting, nongastric, alpha polypeptide [Source:HGNC Symbol;Acc:13816]
P54725	RAD23A	RAD23 homolog A (S. cerevisiae) [Source:HGNC Symbol;Acc:9812]
P54819	AK2	adenylate kinase 2 [Source:HGNC Symbol;Acc:362]
P54868	HMGCS2	3-hydroxy-3-methylglutaryl-CoA synthase 2 (mitochondrial) [Source:HGNC Symbol;Acc:5008]
P54920	NAPA	N-ethylmaleimide-sensitive factor attachment protein, alpha [Source:HGNC Symbol;Acc:7641]
P55008	AIF1	allograft inflammatory factor 1 [Source:HGNC Symbol;Acc:352]
P55040	GEM	GTP binding protein overexpressed in skeletal muscle [Source:HGNC Symbol;Acc:4234]
P55060	CSE1L	CSE1 chromosome segregation 1-like (yeast) [Source:HGNC Symbol;Acc:2431]
P55081	MFAP1	microfibrillar-associated protein 1 [Source:HGNC Symbol;Acc:7032]
P55084	HADHB	hydroxyacyl-CoA dehydrogenase/3-ketoacyl-CoA thiolase/enoyl-CoA hydratase (trifunctional protein), beta subunit [Source:HGNC Symbol;Acc:4803]
P55160	NCKAP1L	NCK-associated protein 1-like [Source:HGNC Symbol;Acc:4862]
P55209	NAP1L1	nucleosome assembly protein 1-like 1 [Source:HGNC Symbol;Acc:7637]
P55263	ADK	adenosine kinase [Source:HGNC Symbol;Acc:257]
P55809	OXCT1	3-oxoacid CoA transferase 1 [Source:HGNC Symbol;Acc:8527]
P55884	EIF3B	eukaryotic translation initiation factor 3, subunit B [Source:HGNC Symbol;Acc:3280]
P56192	MARS	methionyl-tRNA synthetase [Source:HGNC Symbol;Acc:6898]
P56211	ARPP19	cAMP-regulated phosphoprotein, 19kDa [Source:HGNC Symbol;Acc:16967]
P56378	C14orf2	chromosome 14 open reading frame 2 [Source:HGNC Symbol;Acc:1188]
P56381	ATP5E	ATP synthase, H+ transporting, mitochondrial F1 complex, epsilon subunit [Source:HGNC Symbol;Acc:838]
P56545	CTBP2	C-terminal binding protein 2 [Source:HGNC Symbol;Acc:2495]
P56693	SOX10	SRY (sex determining region Y)-box 10 [Source:HGNC Symbol;Acc:11190]
P56937	HSD17B7	hydroxysteroid (17-beta) dehydrogenase 7 [Source:HGNC Symbol;Acc:5215]
P56962	STX17	syntaxin 17 [Source:HGNC Symbol;Acc:11432]
P57737	CORO7	coronin 7 [Source:HGNC Symbol;Acc:26161]
P58546	MTPN	myotrophin [Source:HGNC Symbol;Acc:15667]
P59998	ARPC4	actin related protein 2/3 complex, subunit 4, 20kDa [Source:HGNC Symbol;Acc:707]
P60174	TPI1	triosephosphate isomerase 1 [Source:HGNC Symbol;Acc:12009]
P60228	EIF3E	eukaryotic translation initiation factor 3, subunit E [Source:HGNC Symbol;Acc:3277]
P60484	PTEN	phosphatase and tensin homolog [Source:HGNC Symbol;Acc:9588]
P60520	GABARAPL2	GABA(A) receptor-associated protein-like 2 [Source:HGNC Symbol;Acc:13291]
P60660	MYL6	myosin, light chain 6, alkali, smooth muscle and non-muscle [Source:HGNC Symbol;Acc:7587]
P60842	EIF4A1	eukaryotic translation initiation factor 4A1 [Source:HGNC Symbol;Acc:3282]
P60891	PRPS1	phosphoribosyl pyrophosphate synthetase 1 [Source:HGNC Symbol;Acc:9462]
P60900	PSMA6	proteasome (prosome, macropain) subunit, alpha type, 6 [Source:HGNC Symbol;Acc:9535]
P60903	S100A10	S100 calcium binding protein A10 [Source:HGNC Symbol;Acc:10487]
P60953	CDC42	cell division cycle 42 (GTP binding protein, 25kDa) [Source:HGNC Symbol;Acc:1736]
P60981	DSTN	destrin (actin depolymerizing factor) [Source:HGNC Symbol;Acc:15750]
P61011	SRP54	signal recognition particle 54kDa [Source:HGNC Symbol;Acc:11301]
P61026	RAB10	RAB10, member RAS oncogene family [Source:HGNC Symbol;Acc:9759]
P61086	UBE2K	ubiquitin-conjugating enzyme E2K [Source:HGNC Symbol;Acc:4914]
P61088	UBE2N	ubiquitin-conjugating enzyme E2N [Source:HGNC Symbol;Acc:12492]
P61158	ACTR3	ARP3 actin-related protein 3 homolog (yeast) [Source:HGNC Symbol;Acc:170]
P61160	ACTR2	ARP2 actin-related protein 2 homolog (yeast) [Source:HGNC Symbol;Acc:169]
P61221	ABCE1	ATP-binding cassette, sub-family E (OABP), member 1 [Source:HGNC Symbol;Acc:69]
P61244	MAX	MYC associated factor X [Source:HGNC Symbol;Acc:6913]
P61247	RPS3A	ribosomal protein S3A [Source:HGNC Symbol;Acc:10421]
P61289	PSME3	proteasome (prosome, macropain) activator subunit 3 (PA28 gamma; Ki) [Source:HGNC Symbol;Acc:9570]
P61313	RPL15	ribosomal protein L15 [Source:HGNC Symbol;Acc:10306]
P61353	RPL27	ribosomal protein L27 [Source:HGNC Symbol;Acc:10328]
P61457	PCBD1	pterin-4 alpha-carbinolamine dehydratase/dimerization cofactor of hepatocyte nuclear factor 1 alpha [Source:HGNC Symbol;Acc:8646]
P61604	HSPE1	heat shock 10kDa protein 1 (chaperonin 10) [Source:HGNC Symbol;Acc:5269]
P61758	VBP1	von Hippel-Lindau binding protein 1 [Source:HGNC Symbol;Acc:12662]
P61927	RPL37	ribosomal protein L37 [Source:HGNC Symbol;Acc:10347]
P61956	SUMO2	SMT3 suppressor of mif two 3 homolog 2 (S. cerevisiae) [Source:HGNC Symbol;Acc:11125]
P61964	WDR5	WD repeat domain 5 [Source:HGNC Symbol;Acc:12757]
P62081	RPS7	ribosomal protein S7 [Source:HGNC Symbol;Acc:10440]
P62158	CALM2	calmodulin 2 (phosphorylase kinase, delta) [Source:HGNC Symbol;Acc:1445]
P62191	PSMC1	proteasome (prosome, macropain) 26S subunit, ATPase, 1 [Source:HGNC Symbol;Acc:9547]
P62195	PSMC5	proteasome (prosome, macropain) 26S subunit, ATPase, 5 [Source:HGNC Symbol;Acc:9552]
P62249	RPS16	ribosomal protein S16 [Source:HGNC Symbol;Acc:10396]
P62256	UBE2H	ubiquitin-conjugating enzyme E2H [Source:HGNC Symbol;Acc:12484]
P62258	YWHAE	tyrosine 3-monooxygenase/tryptophan 5-monooxygenase activation protein, epsilon polypeptide [Source:HGNC Symbol;Acc:12851]
P62266	RPS23	ribosomal protein S23 [Source:HGNC Symbol;Acc:10410]
P62269	RPS18	ribosomal protein S18 [Source:HGNC Symbol;Acc:10401]
P62273	RPS29	ribosomal protein S29 [Source:HGNC Symbol;Acc:10419]
P62277	RPS13	ribosomal protein S13 [Source:HGNC Symbol;Acc:10386]
P62280	RPS11	ribosomal protein S11 [Source:HGNC Symbol;Acc:10384]
P62312	LSM6	LSM6 homolog, U6 small nuclear RNA associated (S. cerevisiae) [Source:HGNC Symbol;Acc:17017]
P62328	TMSL3	thymosin-like 3 [Source:HGNC Symbol;Acc:11885]
P62333	PSMC6	proteasome (prosome, macropain) 26S subunit, ATPase, 6 [Source:HGNC Symbol;Acc:9553]
P62424	RPL7A	ribosomal protein L7a [Source:HGNC Symbol;Acc:10364]
P62633	CNBP	CCHC-type zinc finger, nucleic acid binding protein [Source:HGNC Symbol;Acc:13164]
P62701	RPS4X	ribosomal protein S4, X-linked [Source:HGNC Symbol;Acc:10424]
P62736	ACTA2	actin, alpha 2, smooth muscle, aorta [Source:HGNC Symbol;Acc:130]
P62753	RPS6	ribosomal protein S6 [Source:HGNC Symbol;Acc:10429]
P62805	HIST1H4B	histone cluster 1, H4b [Source:HGNC Symbol;Acc:4789]
P62807	HIST1H2BJ	histone cluster 1, H2bj [Source:HGNC Symbol;Acc:4761]
P62826	RAN	RAN, member RAS oncogene family [Source:HGNC Symbol;Acc:9846]
P62847	RPS24	ribosomal protein S24 [Source:HGNC Symbol;Acc:10411]
P62851	RPS25	ribosomal protein S25 [Source:HGNC Symbol;Acc:10413]
P62854	RPS26	ribosomal protein S26 [Source:HGNC Symbol;Acc:10414]
P62899	RPL31	ribosomal protein L31 [Source:HGNC Symbol;Acc:10334]
P62906	RPL10A	ribosomal protein L10a [Source:HGNC Symbol;Acc:10299]
P62913	RPL11	ribosomal protein L11 [Source:HGNC Symbol;Acc:10301]
P62917	RPL8	ribosomal protein L8 [Source:HGNC Symbol;Acc:10368]
P62937	PPIA	peptidylprolyl isomerase A (cyclophilin A) [Source:HGNC Symbol;Acc:9253]
P62979	RPS27A	ribosomal protein S27a [Source:HGNC Symbol;Acc:10417]
P62987	UBA52	ubiquitin A-52 residue ribosomal protein fusion product 1 [Source:HGNC Symbol;Acc:12458]
P62993	GRB2	growth factor receptor-bound protein 2 [Source:HGNC Symbol;Acc:4566]
P63010	AP2B1	adaptor-related protein complex 2, beta 1 subunit [Source:HGNC Symbol;Acc:563]
P63104	YWHAZ	tyrosine 3-monooxygenase/tryptophan 5-monooxygenase activation protein, zeta polypeptide [Source:HGNC Symbol;Acc:12855]
P63151	PPP2R2A	protein phosphatase 2, regulatory subunit B, alpha [Source:HGNC Symbol;Acc:9304]
P63165	SUMO1	SMT3 suppressor of mif two 3 homolog 1 (S. cerevisiae) [Source:HGNC Symbol;Acc:12502]
P63167	DYNLL1	dynein, light chain, LC8-type 1 [Source:HGNC Symbol;Acc:15476]
P63173	RPL38	ribosomal protein L38 [Source:HGNC Symbol;Acc:10349]
P63241	EIF5A	eukaryotic translation initiation factor 5A [Source:HGNC Symbol;Acc:3300]
P63313	TMSB10	thymosin beta 10 [Source:HGNC Symbol;Acc:11879]
P67936	TPM4	tropomyosin 4 [Source:HGNC Symbol;Acc:12013]
P68032	ACTC1	actin, alpha, cardiac muscle 1 [Source:HGNC Symbol;Acc:143]
P68036	UBE2L3	ubiquitin-conjugating enzyme E2L 3 [Source:HGNC Symbol;Acc:12488]
P68104	EEF1A1	eukaryotic translation elongation factor 1 alpha 1 [Source:HGNC Symbol;Acc:3189]
P68366	TUBA4A	tubulin, alpha 4a [Source:HGNC Symbol;Acc:12407]
P68371	TUBB2C	tubulin, beta 2C [Source:HGNC Symbol;Acc:20771]
P68431	HIST1H3E	histone cluster 1, H3e [Source:HGNC Symbol;Acc:4769]
P68871	HBB	hemoglobin, beta [Source:HGNC Symbol;Acc:4827]
P69905	HBA2	hemoglobin, alpha 2 [Source:HGNC Symbol;Acc:4824]
P78310	CXADR	coxsackie virus and adenovirus receptor [Source:HGNC Symbol;Acc:2559]
P78316	NOP14	NOP14 nucleolar protein homolog (yeast) [Source:HGNC Symbol;Acc:16821]
P78318	IGBP1	immunoglobulin (CD79A) binding protein 1 [Source:HGNC Symbol;Acc:5461]
P78356	PIP4K2B	phosphatidylinositol-5-phosphate 4-kinase, type II, beta [Source:HGNC Symbol;Acc:8998]
P78364	PHC1	polyhomeotic homolog 1 (Drosophila) [Source:HGNC Symbol;Acc:3182]
P78371	CCT2	chaperonin containing TCP1, subunit 2 (beta) [Source:HGNC Symbol;Acc:1615]
P78417	GSTO1	glutathione S-transferase omega 1 [Source:HGNC Symbol;Acc:13312]
P78509	RELN	reelin [Source:HGNC Symbol;Acc:9957]
P78527	PRKDC	protein kinase, DNA-activated, catalytic polypeptide [Source:HGNC Symbol;Acc:9413]
P78540	ARG2	arginase, type II [Source:HGNC Symbol;Acc:664]
P80108	GPLD1	glycosylphosphatidylinositol specific phospholipase D1 [Source:HGNC Symbol;Acc:4459]
P81605	DCD	dermcidin [Source:HGNC Symbol;Acc:14669]
P82094	TMF1	TATA element modulatory factor 1 [Source:HGNC Symbol;Acc:11870]
P82650	MRPS22	mitochondrial ribosomal protein S22 [Source:HGNC Symbol;Acc:14508]
P82933	MRPS9	mitochondrial ribosomal protein S9 [Source:HGNC Symbol;Acc:14501]
P82979	SARNP	SAP domain containing ribonucleoprotein [Source:HGNC Symbol;Acc:24432]
P83111	LACTB	lactamase, beta [Source:HGNC Symbol;Acc:16468]
P83731	RPL24	ribosomal protein L24 [Source:HGNC Symbol;Acc:10325]
P84077	ARF1	ADP-ribosylation factor 1 [Source:HGNC Symbol;Acc:652]
P84090	ERH	enhancer of rudimentary homolog (Drosophila) [Source:HGNC Symbol;Acc:3447]
P84098	RPL19	ribosomal protein L19 [Source:HGNC Symbol;Acc:10312]
P84103	SRSF3	serine/arginine-rich splicing factor 3 [Source:HGNC Symbol;Acc:10785]
P84243	H3F3A	H3 histone, family 3A [Source:HGNC Symbol;Acc:4764]
P98153	DGCR2	DiGeorge syndrome critical region gene 2 [Source:HGNC Symbol;Acc:2845]
P98175	RBM10	RNA binding motif protein 10 [Source:HGNC Symbol;Acc:9896]
P99999	CYCS	cytochrome c, somatic [Source:HGNC Symbol;Acc:19986]
Q00169	PITPNA	phosphatidylinositol transfer protein, alpha [Source:HGNC Symbol;Acc:9001]
Q00325	SLC25A3	solute carrier family 25 (mitochondrial carrier; phosphate carrier), member 3 [Source:HGNC Symbol;Acc:10989]
Q00403	GTF2B	general transcription factor IIB [Source:HGNC Symbol;Acc:4648]
Q00534	CDK6	cyclin-dependent kinase 6 [Source:HGNC Symbol;Acc:1777]
Q00535	CDK5	cyclin-dependent kinase 5 [Source:HGNC Symbol;Acc:1774]
Q00577	PURA	purine-rich element binding protein A [Source:HGNC Symbol;Acc:9701]
Q00610	CLTC	clathrin, heavy chain (Hc) [Source:HGNC Symbol;Acc:2092]
Q00688	FKBP3	FK506 binding protein 3, 25kDa [Source:HGNC Symbol;Acc:3719]
Q00765	REEP5	receptor accessory protein 5 [Source:HGNC Symbol;Acc:30077]
Q00839	HNRNPU	heterogeneous nuclear ribonucleoprotein U (scaffold attachment factor A) [Source:HGNC Symbol;Acc:5048]
Q00978	IRF9	interferon regulatory factor 9 [Source:HGNC Symbol;Acc:6131]
Q00987	MDM2	Mdm2 p53 binding protein homolog (mouse) [Source:HGNC Symbol;Acc:6973]
Q01082	SPTBN1	spectrin, beta, non-erythrocytic 1 [Source:HGNC Symbol;Acc:11275]
Q01094	E2F1	E2F transcription factor 1 [Source:HGNC Symbol;Acc:3113]
Q01105	SET	SET nuclear oncogene [Source:HGNC Symbol;Acc:10760]
Q01130	SRSF2	serine/arginine-rich splicing factor 2 [Source:HGNC Symbol;Acc:10783]
Q01196	RUNX1	runt-related transcription factor 1 [Source:HGNC Symbol;Acc:10471]
Q01433	AMPD2	adenosine monophosphate deaminase 2 [Source:HGNC Symbol;Acc:469]
Q01469	FABP5	fatty acid binding protein 5 (psoriasis-associated) [Source:HGNC Symbol;Acc:3560]
Q01518	CAP1	CAP, adenylate cyclase-associated protein 1 (yeast) [Source:HGNC Symbol;Acc:20040]
Q01543	FLI1	Friend leukemia virus integration 1 [Source:HGNC Symbol;Acc:3749]
Q01581	HMGCS1	3-hydroxy-3-methylglutaryl-CoA synthase 1 (soluble) [Source:HGNC Symbol;Acc:5007]
Q01780	EXOSC10	exosome component 10 [Source:HGNC Symbol;Acc:9138]
Q01813	PFKP	phosphofructokinase, platelet [Source:HGNC Symbol;Acc:8878]
Q01814	ATP2B2	ATPase, Ca++ transporting, plasma membrane 2 [Source:HGNC Symbol;Acc:815]
Q01995	TAGLN	transgelin [Source:HGNC Symbol;Acc:11553]
Q02078	MEF2A	myocyte enhancer factor 2A [Source:HGNC Symbol;Acc:6993]
Q02218	OGDH	oxoglutarate (alpha-ketoglutarate) dehydrogenase (lipoamide) [Source:HGNC Symbol;Acc:8124]
Q02252	ALDH6A1	aldehyde dehydrogenase 6 family, member A1 [Source:HGNC Symbol;Acc:7179]
Q02297	NRG1	neuregulin 1 [Source:HGNC Symbol;Acc:7997]
Q02539	HIST1H1A	histone cluster 1, H1a [Source:HGNC Symbol;Acc:4715]
Q02790	FKBP4	FK506 binding protein 4, 59kDa [Source:HGNC Symbol;Acc:3720]
Q02880	TOP2B	topoisomerase (DNA) II beta 180kDa [Source:HGNC Symbol;Acc:11990]
Q02978	SLC25A11	solute carrier family 25 (mitochondrial carrier; oxoglutarate carrier), member 11 [Source:HGNC Symbol;Acc:10981]
Q03013	GSTM4	glutathione S-transferase mu 4 [Source:HGNC Symbol;Acc:4636]
Q03111	MLLT1	myeloid/lymphoid or mixed-lineage leukemia (trithorax homolog, Drosophila); translocated to, 1 [Source:HGNC Symbol;Acc:7134]
Q03112	MECOM	MDS1 and EVI1 complex locus [Source:HGNC Symbol;Acc:3498]
Q03164	MLL	myeloid/lymphoid or mixed-lineage leukemia (trithorax homolog, Drosophila) [Source:HGNC Symbol;Acc:7132]
Q03252	LMNB2	lamin B2 [Source:HGNC Symbol;Acc:6638]
Q03701	CEBPZ	CCAAT/enhancer binding protein (C/EBP), zeta [Source:HGNC Symbol;Acc:24218]
Q04206	RELA	v-rel reticuloendotheliosis viral oncogene homolog A (avian) [Source:HGNC Symbol;Acc:9955]
Q04446	GBE1	glucan (1,4-alpha-), branching enzyme 1 [Source:HGNC Symbol;Acc:4180]
Q04637	EIF4G1	eukaryotic translation initiation factor 4 gamma, 1 [Source:HGNC Symbol;Acc:3296]
Q04724	TLE1	transducin-like enhancer of split 1 (E(sp1) homolog, Drosophila) [Source:HGNC Symbol;Acc:11837]
Q04759	PRKCQ	protein kinase C, theta [Source:HGNC Symbol;Acc:9410]
Q04760	GLO1	glyoxalase I [Source:HGNC Symbol;Acc:4323]
Q04837	SSBP1	single-stranded DNA binding protein 1 [Source:HGNC Symbol;Acc:11317]
Q05066	SRY	sex determining region Y [Source:HGNC Symbol;Acc:11311]
Q05516	ZBTB16	zinc finger and BTB domain containing 16 [Source:HGNC Symbol;Acc:12930]
Q05639	EEF1A2	eukaryotic translation elongation factor 1 alpha 2 [Source:HGNC Symbol;Acc:3192]
Q05682	CALD1	caldesmon 1 [Source:HGNC Symbol;Acc:1441]
Q05823	RNASEL	ribonuclease L (2',5'-oligoisoadenylate synthetase-dependent) [Source:HGNC Symbol;Acc:10050]
Q06033	ITIH3	inter-alpha (globulin) inhibitor H3 [Source:HGNC Symbol;Acc:6168]
Q06124	PTPN11	protein tyrosine phosphatase, non-receptor type 11 [Source:HGNC Symbol;Acc:9644]
Q06203	PPAT	phosphoribosyl pyrophosphate amidotransferase [Source:HGNC Symbol;Acc:9238]
Q06265	EXOSC9	exosome component 9 [Source:HGNC Symbol;Acc:9137]
Q06330	RBPJ	recombination signal binding protein for immunoglobulin kappa J region [Source:HGNC Symbol;Acc:5724]
Q06413	MEF2C	myocyte enhancer factor 2C [Source:HGNC Symbol;Acc:6996]
Q06520	SULT2A1	sulfotransferase family, cytosolic, 2A, dehydroepiandrosterone (DHEA)-preferring, member 1 [Source:HGNC Symbol;Acc:11458]
Q06546	GABPA	GA binding protein transcription factor, alpha subunit 60kDa [Source:HGNC Symbol;Acc:4071]
Q06732	ZNF33B	zinc finger protein 33B [Source:HGNC Symbol;Acc:13097]
Q06830	PRDX1	peroxiredoxin 1 [Source:HGNC Symbol;Acc:9352]
Q07020	RPL18	ribosomal protein L18 [Source:HGNC Symbol;Acc:10310]
Q07021	C1QBP	complement component 1, q subcomponent binding protein [Source:HGNC Symbol;Acc:1243]
Q07666	KHDRBS1	KH domain containing, RNA binding, signal transduction associated 1 [Source:HGNC Symbol;Acc:18116]
Q07866	KLC1	kinesin light chain 1 [Source:HGNC Symbol;Acc:6387]
Q07955	SRSF1	serine/arginine-rich splicing factor 1 [Source:HGNC Symbol;Acc:10780]
Q07960	ARHGAP1	Rho GTPase activating protein 1 [Source:HGNC Symbol;Acc:673]
Q08211	DHX9	DEAH (Asp-Glu-Ala-His) box polypeptide 9 [Source:HGNC Symbol;Acc:2750]
Q08257	CRYZ	crystallin, zeta (quinone reductase) [Source:HGNC Symbol;Acc:2419]
Q08426	EHHADH	enoyl-CoA, hydratase/3-hydroxyacyl CoA dehydrogenase [Source:HGNC Symbol;Acc:3247]
Q08477	CYP4F3	cytochrome P450, family 4, subfamily F, polypeptide 3 [Source:HGNC Symbol;Acc:2646]
Q08554	DSC1	desmocollin 1 [Source:HGNC Symbol;Acc:3035]
Q08881	ITK	IL2-inducible T-cell kinase [Source:HGNC Symbol;Acc:6171]
Q08945	SSRP1	structure specific recognition protein 1 [Source:HGNC Symbol;Acc:11327]
Q09028	RBBP4	retinoblastoma binding protein 4 [Source:HGNC Symbol;Acc:9887]
Q09161	NCBP1	nuclear cap binding protein subunit 1, 80kDa [Source:HGNC Symbol;Acc:7658]
Q09472	EP300	E1A binding protein p300 [Source:HGNC Symbol;Acc:3373]
Q09666	AHNAK	AHNAK nucleoprotein [Source:HGNC Symbol;Acc:347]
Q0VF96	CGNL1	cingulin-like 1 [Source:HGNC Symbol;Acc:25931]
Q0ZGT2	NEXN	nexilin (F actin binding protein) [Source:HGNC Symbol;Acc:29557]
Q10567	AP1B1	adaptor-related protein complex 1, beta 1 subunit [Source:HGNC Symbol;Acc:554]
Q10713	PMPCA	peptidase (mitochondrial processing) alpha [Source:HGNC Symbol;Acc:18667]
Q12769	NUP160	nucleoporin 160kDa [Source:HGNC Symbol;Acc:18017]
Q12816	TRO	trophinin [Source:HGNC Symbol;Acc:12326]
Q12830	BPTF	bromodomain PHD finger transcription factor [Source:HGNC Symbol;Acc:3581]
Q12872	SFSWAP	splicing factor, suppressor of white-apricot homolog (Drosophila) [Source:HGNC Symbol;Acc:10790]
Q12873	CHD3	chromodomain helicase DNA binding protein 3 [Source:HGNC Symbol;Acc:1918]
Q12874	SF3A3	splicing factor 3a, subunit 3, 60kDa [Source:HGNC Symbol;Acc:10767]
Q12882	DPYD	dihydropyrimidine dehydrogenase [Source:HGNC Symbol;Acc:3012]
Q12899	TRIM26	tripartite motif containing 26 [Source:HGNC Symbol;Acc:12962]
Q12904	AIMP1	aminoacyl tRNA synthetase complex-interacting multifunctional protein 1 [Source:HGNC Symbol;Acc:10648]
Q12906	ILF3	interleukin enhancer binding factor 3, 90kDa [Source:HGNC Symbol;Acc:6038]
Q12931	TRAP1	TNF receptor-associated protein 1 [Source:HGNC Symbol;Acc:16264]
Q13011	ECH1	enoyl CoA hydratase 1, peroxisomal [Source:HGNC Symbol;Acc:3149]
Q13045	FLII	flightless I homolog (Drosophila) [Source:HGNC Symbol;Acc:3750]
Q13061	TRDN	triadin [Source:HGNC Symbol;Acc:12261]
Q13085	ACACA	acetyl-CoA carboxylase alpha [Source:HGNC Symbol;Acc:84]
Q13087	PDIA2	protein disulfide isomerase family A, member 2 [Source:HGNC Symbol;Acc:14180]
Q13098	GPS1	G protein pathway suppressor 1 [Source:HGNC Symbol;Acc:4549]
Q13105	ZBTB17	zinc finger and BTB domain containing 17 [Source:HGNC Symbol;Acc:12936]
Q13112	CHAF1B	chromatin assembly factor 1, subunit B (p60) [Source:HGNC Symbol;Acc:1911]
Q13123	IK	IK cytokine, down-regulator of HLA II [Source:HGNC Symbol;Acc:5958]
Q13153	PAK1	p21 protein (Cdc42/Rac)-activated kinase 1 [Source:HGNC Symbol;Acc:8590]
Q13164	MAPK7	mitogen-activated protein kinase 7 [Source:HGNC Symbol;Acc:6880]
Q13177	PAK2	p21 protein (Cdc42/Rac)-activated kinase 2 [Source:HGNC Symbol;Acc:8591]
Q13185	CBX3	chromobox homolog 3 [Source:HGNC Symbol;Acc:1553]
Q13206	DDX10	DEAD (Asp-Glu-Ala-Asp) box polypeptide 10 [Source:HGNC Symbol;Acc:2735]
Q13224	GRIN2B	glutamate receptor, ionotropic, N-methyl D-aspartate 2B [Source:HGNC Symbol;Acc:4586]
Q13243	SRSF5	serine/arginine-rich splicing factor 5 [Source:HGNC Symbol;Acc:10787]
Q13247	SRSF6	serine/arginine-rich splicing factor 6 [Source:HGNC Symbol;Acc:10788]
Q13263	TRIM28	tripartite motif containing 28 [Source:HGNC Symbol;Acc:16384]
Q13283	G3BP1	GTPase activating protein (SH3 domain) binding protein 1 [Source:HGNC Symbol;Acc:30292]
Q13285	NR5A1	nuclear receptor subfamily 5, group A, member 1 [Source:HGNC Symbol;Acc:7983]
Q13303	KCNAB2	potassium voltage-gated channel, shaker-related subfamily, beta member 2 [Source:HGNC Symbol;Acc:6229]
Q13315	ATM	ataxia telangiectasia mutated [Source:HGNC Symbol;Acc:795]
Q13330	MTA1	metastasis associated 1 [Source:HGNC Symbol;Acc:7410]
Q13347	EIF3I	eukaryotic translation initiation factor 3, subunit I [Source:HGNC Symbol;Acc:3272]
Q13351	KLF1	Kruppel-like factor 1 (erythroid) [Source:HGNC Symbol;Acc:6345]
Q13356	PPIL2	peptidylprolyl isomerase (cyclophilin)-like 2 [Source:HGNC Symbol;Acc:9261]
Q13415	ORC1	origin recognition complex, subunit 1 [Source:HGNC Symbol;Acc:8487]
Q13423	NNT	nicotinamide nucleotide transhydrogenase [Source:HGNC Symbol;Acc:7863]
Q13427	PPIG	peptidylprolyl isomerase G (cyclophilin G) [Source:HGNC Symbol;Acc:14650]
Q13428	TCOF1	Treacher Collins-Franceschetti syndrome 1 [Source:HGNC Symbol;Acc:11654]
Q13435	SF3B2	splicing factor 3b, subunit 2, 145kDa [Source:HGNC Symbol;Acc:10769]
Q13442	PDAP1	PDGFA associated protein 1 [Source:HGNC Symbol;Acc:14634]
Q13464	ROCK1	Rho-associated, coiled-coil containing protein kinase 1 [Source:HGNC Symbol;Acc:10251]
Q13485	SMAD4	SMAD family member 4 [Source:HGNC Symbol;Acc:6770]
Q13509	TUBB3	tubulin, beta 3 [Source:HGNC Symbol;Acc:20772]
Q13523	PRPF4B	PRP4 pre-mRNA processing factor 4 homolog B (yeast) [Source:HGNC Symbol;Acc:17346]
Q13526	PIN1	peptidylprolyl cis/trans isomerase, NIMA-interacting 1 [Source:HGNC Symbol;Acc:8988]
Q13547	HDAC1	histone deacetylase 1 [Source:HGNC Symbol;Acc:4852]
Q13569	TDG	thymine-DNA glycosylase [Source:HGNC Symbol;Acc:11700]
Q13573	SNW1	SNW domain containing 1 [Source:HGNC Symbol;Acc:16696]
Q13576	IQGAP2	IQ motif containing GTPase activating protein 2 [Source:HGNC Symbol;Acc:6111]
Q13596	SNX1	sorting nexin 1 [Source:HGNC Symbol;Acc:11172]
Q13617	CUL2	cullin 2 [Source:HGNC Symbol;Acc:2552]
Q13619	CUL4A	cullin 4A [Source:HGNC Symbol;Acc:2554]
Q13627	DYRK1A	dual-specificity tyrosine-(Y)-phosphorylation regulated kinase 1A [Source:HGNC Symbol;Acc:3091]
Q13630	TSTA3	tissue specific transplantation antigen P35B [Source:HGNC Symbol;Acc:12390]
Q13733	ATP1A4	ATPase, Na+/K+ transporting, alpha 4 polypeptide [Source:HGNC Symbol;Acc:14073]
Q13761	RUNX3	runt-related transcription factor 3 [Source:HGNC Symbol;Acc:10473]
Q13765	NACA	nascent polypeptide-associated complex alpha subunit [Source:HGNC Symbol;Acc:7629]
Q13796	SHROOM2	shroom family member 2 [Source:HGNC Symbol;Acc:630]
Q13813	SPTAN1	spectrin, alpha, non-erythrocytic 1 (alpha-fodrin) [Source:HGNC Symbol;Acc:11273]
Q13838	DDX39B	DEAD (Asp-Glu-Ala-Asp) box polypeptide 39B [Source:HGNC Symbol;Acc:13917]
Q13867	BLMH	bleomycin hydrolase [Source:HGNC Symbol;Acc:1059]
Q13895	BYSL	bystin-like [Source:HGNC Symbol;Acc:1157]
Q13907	IDI1	isopentenyl-diphosphate delta isomerase 1 [Source:HGNC Symbol;Acc:5387]
Q14004	CDK13	cyclin-dependent kinase 13 [Source:HGNC Symbol;Acc:1733]
Q14008	CKAP5	cytoskeleton associated protein 5 [Source:HGNC Symbol;Acc:28959]
Q14019	COTL1	coactosin-like 1 (Dictyostelium) [Source:HGNC Symbol;Acc:18304]
Q14032	BAAT	bile acid CoA: amino acid N-acyltransferase (glycine N-choloyltransferase) [Source:HGNC Symbol;Acc:932]
Q14103	HNRNPD	heterogeneous nuclear ribonucleoprotein D (AU-rich element RNA binding protein 1, 37kDa) [Source:HGNC Symbol;Acc:5036]
Q14139	UBE4A	ubiquitination factor E4A [Source:HGNC Symbol;Acc:12499]
Q14151	SAFB2	scaffold attachment factor B2 [Source:HGNC Symbol;Acc:21605]
Q14152	EIF3A	eukaryotic translation initiation factor 3, subunit A [Source:HGNC Symbol;Acc:3271]
Q14191	WRN	Werner syndrome, RecQ helicase-like [Source:HGNC Symbol;Acc:12791]
Q14204	DYNC1H1	dynein, cytoplasmic 1, heavy chain 1 [Source:HGNC Symbol;Acc:2961]
Q14244	MAP7	microtubule-associated protein 7 [Source:HGNC Symbol;Acc:6869]
Q14247	CTTN	cortactin [Source:HGNC Symbol;Acc:3338]
Q14258	TRIM25	tripartite motif containing 25 [Source:HGNC Symbol;Acc:12932]
Q14331	FRG1	FSHD region gene 1 [Source:HGNC Symbol;Acc:3954]
Q14457	BECN1	beclin 1, autophagy related [Source:HGNC Symbol;Acc:1034]
Q14526	HIC1	hypermethylated in cancer 1 [Source:HGNC Symbol;Acc:4909]
Q14566	MCM6	minichromosome maintenance complex component 6 [Source:HGNC Symbol;Acc:6949]
Q14571	ITPR2	inositol 1,4,5-trisphosphate receptor, type 2 [Source:HGNC Symbol;Acc:6181]
Q14676	MDC1	mediator of DNA-damage checkpoint 1 [Source:HGNC Symbol;Acc:21163]
Q14683	SMC1A	structural maintenance of chromosomes 1A [Source:HGNC Symbol;Acc:11111]
Q14684	RRP1B	ribosomal RNA processing 1 homolog B (S. cerevisiae) [Source:HGNC Symbol;Acc:23818]
Q14687	KIAA0182	KIAA0182 [Source:HGNC Symbol;Acc:28979]
Q14739	LBR	lamin B receptor [Source:HGNC Symbol;Acc:6518]
Q147X3	NAA30	N(alpha)-acetyltransferase 30, NatC catalytic subunit [Source:HGNC Symbol;Acc:19844]
Q14807	KIF22	kinesin family member 22 [Source:HGNC Symbol;Acc:6391]
Q14814	MEF2D	myocyte enhancer factor 2D [Source:HGNC Symbol;Acc:6997]
Q14839	CHD4	chromodomain helicase DNA binding protein 4 [Source:HGNC Symbol;Acc:1919]
Q14847	LASP1	LIM and SH3 protein 1 [Source:HGNC Symbol;Acc:6513]
Q14865	ARID5B	AT rich interactive domain 5B (MRF1-like) [Source:HGNC Symbol;Acc:17362]
Q14919	DRAP1	DR1-associated protein 1 (negative cofactor 2 alpha) [Source:HGNC Symbol;Acc:3019]
Q14966	ZNF638	zinc finger protein 638 [Source:HGNC Symbol;Acc:17894]
Q14974	KPNB1	karyopherin (importin) beta 1 [Source:HGNC Symbol;Acc:6400]
Q14978	NOLC1	nucleolar and coiled-body phosphoprotein 1 [Source:HGNC Symbol;Acc:15608]
Q14980	NUMA1	nuclear mitotic apparatus protein 1 [Source:HGNC Symbol;Acc:8059]
Q149N8	SHPRH	SNF2 histone linker PHD RING helicase [Source:HGNC Symbol;Acc:19336]
Q14BN4	SLMAP	sarcolemma associated protein [Source:HGNC Symbol;Acc:16643]
Q15003	NCAPH	non-SMC condensin I complex, subunit H [Source:HGNC Symbol;Acc:1112]
Q15004	KIAA0101	KIAA0101 [Source:HGNC Symbol;Acc:28961]
Q15005	SPCS2	signal peptidase complex subunit 2 homolog (S. cerevisiae) [Source:HGNC Symbol;Acc:28962]
Q15006	TTC35	tetratricopeptide repeat domain 35 [Source:HGNC Symbol;Acc:28963]
Q15011	HERPUD1	homocysteine-inducible, endoplasmic reticulum stress-inducible, ubiquitin-like domain member 1 [Source:HGNC Symbol;Acc:13744]
Q15024	EXOSC7	exosome component 7 [Source:HGNC Symbol;Acc:28112]
Q15025	TNIP1	TNFAIP3 interacting protein 1 [Source:HGNC Symbol;Acc:16903]
Q15027	ACAP1	ArfGAP with coiled-coil, ankyrin repeat and PH domains 1 [Source:HGNC Symbol;Acc:16467]
Q15031	LARS2	leucyl-tRNA synthetase 2, mitochondrial [Source:HGNC Symbol;Acc:17095]
Q15052	ARHGEF6	Rac/Cdc42 guanine nucleotide exchange factor (GEF) 6 [Source:HGNC Symbol;Acc:685]
Q15067	ACOX1	acyl-CoA oxidase 1, palmitoyl [Source:HGNC Symbol;Acc:119]
Q15125	EBP	emopamil binding protein (sterol isomerase) [Source:HGNC Symbol;Acc:3133]
Q15149	PLEC	plectin [Source:HGNC Symbol;Acc:9069]
Q15154	PCM1	pericentriolar material 1 [Source:HGNC Symbol;Acc:8727]
Q15181	PPA1	pyrophosphatase (inorganic) 1 [Source:HGNC Symbol;Acc:9226]
Q15185	PTGES3	prostaglandin E synthase 3 (cytosolic) [Source:HGNC Symbol;Acc:16049]
Q15233	NONO	non-POU domain containing, octamer-binding [Source:HGNC Symbol;Acc:7871]
Q15257	PPP2R4	protein phosphatase 2A activator, regulatory subunit 4 [Source:HGNC Symbol;Acc:9308]
Q15269	PWP2	PWP2 periodic tryptophan protein homolog (yeast) [Source:HGNC Symbol;Acc:9711]
Q15276	RABEP1	rabaptin, RAB GTPase binding effector protein 1 [Source:HGNC Symbol;Acc:17677]
Q15287	RNPS1	RNA binding protein S1, serine-rich domain [Source:HGNC Symbol;Acc:10080]
Q15293	RCN1	reticulocalbin 1, EF-hand calcium binding domain [Source:HGNC Symbol;Acc:9934]
Q15303	ERBB4	v-erb-a erythroblastic leukemia viral oncogene homolog 4 (avian) [Source:HGNC Symbol;Acc:3432]
Q15361	TTF1	transcription termination factor, RNA polymerase I [Source:HGNC Symbol;Acc:12397]
Q15365	PCBP1	poly(rC) binding protein 1 [Source:HGNC Symbol;Acc:8647]
Q15369	TCEB1	transcription elongation factor B (SIII), polypeptide 1 (15kDa, elongin C) [Source:HGNC Symbol;Acc:11617]
Q15393	SF3B3	splicing factor 3b, subunit 3, 130kDa [Source:HGNC Symbol;Acc:10770]
Q15397	KIAA0020	KIAA0020 [Source:HGNC Symbol;Acc:29676]
Q15437	SEC23B	Sec23 homolog B (S. cerevisiae) [Source:HGNC Symbol;Acc:10702]
Q15459	SF3A1	splicing factor 3a, subunit 1, 120kDa [Source:HGNC Symbol;Acc:10765]
Q15554	TERF2	telomeric repeat binding factor 2 [Source:HGNC Symbol;Acc:11729]
Q15555	MAPRE2	microtubule-associated protein, RP/EB family, member 2 [Source:HGNC Symbol;Acc:6891]
Q15596	NCOA2	nuclear receptor coactivator 2 [Source:HGNC Symbol;Acc:7669]
Q15631	TSN	translin [Source:HGNC Symbol;Acc:12379]
Q15637	SF1	splicing factor 1 [Source:HGNC Symbol;Acc:12950]
Q15648	MED1	mediator complex subunit 1 [Source:HGNC Symbol;Acc:9234]
Q15651	HMGN3	high mobility group nucleosomal binding domain 3 [Source:HGNC Symbol;Acc:12312]
Q15652	JMJD1C	jumonji domain containing 1C [Source:HGNC Symbol;Acc:12313]
Q15678	PTPN14	protein tyrosine phosphatase, non-receptor type 14 [Source:HGNC Symbol;Acc:9647]
Q15691	MAPRE1	microtubule-associated protein, RP/EB family, member 1 [Source:HGNC Symbol;Acc:6890]
Q15699	ALX1	ALX homeobox 1 [Source:HGNC Symbol;Acc:1494]
Q15776	ZNF192	zinc finger protein 192 [Source:HGNC Symbol;Acc:12983]
Q15796	SMAD2	SMAD family member 2 [Source:HGNC Symbol;Acc:6768]
Q15811	ITSN1	intersectin 1 (SH3 domain protein) [Source:HGNC Symbol;Acc:6183]
Q15813	TBCE	tubulin folding cofactor E [Source:HGNC Symbol;Acc:11582]
Q15819	UBE2V2	ubiquitin-conjugating enzyme E2 variant 2 [Source:HGNC Symbol;Acc:12495]
Q15835	GRK1	G protein-coupled receptor kinase 1 [Source:HGNC Symbol;Acc:10013]
Q15843	NEDD8	neural precursor cell expressed, developmentally down-regulated 8 [Source:HGNC Symbol;Acc:7732]
Q15915	ZIC1	Zic family member 1 [Source:HGNC Symbol;Acc:12872]
Q15942	ZYX	zyxin [Source:HGNC Symbol;Acc:13200]
Q16181	2012-09-07	septin 7 [Source:HGNC Symbol;Acc:1717]
Q16186	ADRM1	adhesion regulating molecule 1 [Source:HGNC Symbol;Acc:15759]
Q16222	UAP1	UDP-N-acteylglucosamine pyrophosphorylase 1 [Source:HGNC Symbol;Acc:12457]
Q16281	CNGA3	cyclic nucleotide gated channel alpha 3 [Source:HGNC Symbol;Acc:2150]
Q16352	INA	internexin neuronal intermediate filament protein, alpha [Source:HGNC Symbol;Acc:6057]
Q16513	PKN2	protein kinase N2 [Source:HGNC Symbol;Acc:9406]
Q16518	RPE65	retinal pigment epithelium-specific protein 65kDa [Source:HGNC Symbol;Acc:10294]
Q16526	CRY1	cryptochrome 1 (photolyase-like) [Source:HGNC Symbol;Acc:2384]
Q16531	DDB1	damage-specific DNA binding protein 1, 127kDa [Source:HGNC Symbol;Acc:2717]
Q16543	CDC37	cell division cycle 37 homolog (S. cerevisiae) [Source:HGNC Symbol;Acc:1735]
Q16566	CAMK4	calcium/calmodulin-dependent protein kinase IV [Source:HGNC Symbol;Acc:1464]
Q16594	TAF9	TAF9 RNA polymerase II, TATA box binding protein (TBP)-associated factor, 32kDa [Source:HGNC Symbol;Acc:11542]
Q16629	SRSF7	serine/arginine-rich splicing factor 7 [Source:HGNC Symbol;Acc:10789]
Q16666	IFI16	interferon, gamma-inducible protein 16 [Source:HGNC Symbol;Acc:5395]
Q16695	HIST3H3	histone cluster 3, H3 [Source:HGNC Symbol;Acc:4778]
Q16698	DECR1	2,4-dienoyl CoA reductase 1, mitochondrial [Source:HGNC Symbol;Acc:2753]
Q16718	NDUFA5	NADH dehydrogenase (ubiquinone) 1 alpha subcomplex, 5, 13kDa [Source:HGNC Symbol;Acc:7688]
Q16740	CLPP	ClpP caseinolytic peptidase, ATP-dependent, proteolytic subunit homolog (E. coli) [Source:HGNC Symbol;Acc:2084]
Q16762	TST	thiosulfate sulfurtransferase (rhodanese) [Source:HGNC Symbol;Acc:12388]
Q16798	ME3	malic enzyme 3, NADP(+)-dependent, mitochondrial [Source:HGNC Symbol;Acc:6985]
Q16822	PCK2	phosphoenolpyruvate carboxykinase 2 (mitochondrial) [Source:HGNC Symbol;Acc:8725]
Q16836	HADH	hydroxyacyl-CoA dehydrogenase [Source:HGNC Symbol;Acc:4799]
Q16851	UGP2	UDP-glucose pyrophosphorylase 2 [Source:HGNC Symbol;Acc:12527]
Q16854	DGUOK	deoxyguanosine kinase [Source:HGNC Symbol;Acc:2858]
Q16891	IMMT	inner membrane protein, mitochondrial [Source:HGNC Symbol;Acc:6047]
Q1KMD3	HNRNPUL2	heterogeneous nuclear ribonucleoprotein U-like 2 [Source:HGNC Symbol;Acc:25451]
Q29RF7	PDS5A	PDS5, regulator of cohesion maintenance, homolog A (S. cerevisiae) [Source:HGNC Symbol;Acc:29088]
Q2KHR2	RFX7	regulatory factor X, 7 [Source:HGNC Symbol;Acc:25777]
Q2V2M9	FHOD3	formin homology 2 domain containing 3 [Source:HGNC Symbol;Acc:26178]
Q2VIQ3	KIF4B	kinesin family member 4B [Source:HGNC Symbol;Acc:6322]
Q2VY69	ZNF227	zinc finger protein 227 [Source:HGNC Symbol;Acc:13020]
Q32P41	TRMT5	TRM5 tRNA methyltransferase 5 homolog (S. cerevisiae) [Source:HGNC Symbol;Acc:23141]
Q3L8U1	CHD9	chromodomain helicase DNA binding protein 9 [Source:HGNC Symbol;Acc:25701]
Q3MHD2	LSM12	LSM12 homolog (S. cerevisiae) [Source:HGNC Symbol;Acc:26407]
Q3SY17	MCART2	mitochondrial carrier triple repeat 2 [Source:HGNC Symbol;Acc:23324]
Q3ZCT1	ZNF260	zinc finger protein 260 [Source:HGNC Symbol;Acc:13499]
Q3ZCX4	ZNF568	zinc finger protein 568 [Source:HGNC Symbol;Acc:25392]
Q49A26	GLYR1	glyoxylate reductase 1 homolog (Arabidopsis) [Source:HGNC Symbol;Acc:24434]
Q49MG5	MAP9	microtubule-associated protein 9 [Source:HGNC Symbol;Acc:26118]
Q4G0J3	LARP7	La ribonucleoprotein domain family, member 7 [Source:HGNC Symbol;Acc:24912]
Q4L180	FILIP1L	filamin A interacting protein 1-like [Source:HGNC Symbol;Acc:24589]
Q4L235	AASDH	aminoadipate-semialdehyde dehydrogenase [Source:HGNC Symbol;Acc:23993]
Q4LE39	ARID4B	AT rich interactive domain 4B (RBP1-like) [Source:HGNC Symbol;Acc:15550]
Q4VC31	CCDC58	coiled-coil domain containing 58 [Source:HGNC Symbol;Acc:31136]
Q4VCS5	AMOT	angiomotin [Source:HGNC Symbol;Acc:17810]
Q4VNC1	ATP13A4	ATPase type 13A4 [Source:HGNC Symbol;Acc:25422]
Q53ET0	CRTC2	CREB regulated transcription coactivator 2 [Source:HGNC Symbol;Acc:27301]
Q53FA7	TP53I3	tumor protein p53 inducible protein 3 [Source:HGNC Symbol;Acc:19373]
Q53GL7	PARP10	poly (ADP-ribose) polymerase family, member 10 [Source:HGNC Symbol;Acc:25895]
Q53GQ0	HSD17B12	hydroxysteroid (17-beta) dehydrogenase 12 [Source:HGNC Symbol;Acc:18646]
Q53GS9	USP39	ubiquitin specific peptidase 39 [Source:HGNC Symbol;Acc:20071]
Q53H47	SETMAR	SET domain and mariner transposase fusion gene [Source:HGNC Symbol;Acc:10762]
Q53H82	LACTB2	lactamase, beta 2 [Source:HGNC Symbol;Acc:18512]
Q53QZ3	ARHGAP15	Rho GTPase activating protein 15 [Source:HGNC Symbol;Acc:21030]
Q53T59	HS1BP3	HCLS1 binding protein 3 [Source:HGNC Symbol;Acc:24979]
Q53T94	TAF1B	TATA box binding protein (TBP)-associated factor, RNA polymerase I, B, 63kDa [Source:HGNC Symbol;Acc:11533]
Q53Y44
Q567U6	CCDC93	coiled-coil domain containing 93 [Source:HGNC Symbol;Acc:25611]
Q56NI9	ESCO2	establishment of cohesion 1 homolog 2 (S. cerevisiae) [Source:HGNC Symbol;Acc:27230]
Q56VL3	OCIAD2	OCIA domain containing 2 [Source:HGNC Symbol;Acc:28685]
Q58FG0
Q5BJE1	C18orf34	chromosome 18 open reading frame 34 [Source:HGNC Symbol;Acc:29588]
Q5BKX8	MURC	muscle-related coiled-coil protein [Source:HGNC Symbol;Acc:33742]
Q5HY81
Q5JP01
Q5JSP0	FGD3	FYVE, RhoGEF and PH domain containing 3 [Source:HGNC Symbol;Acc:16027]
Q5K651	SAMD9	sterile alpha motif domain containing 9 [Source:HGNC Symbol;Acc:1348]
Q5M775	SPECC1	sperm antigen with calponin homology and coiled-coil domains 1 [Source:HGNC Symbol;Acc:30615]
Q5QNW6	HIST2H2BF	histone cluster 2, H2bf [Source:HGNC Symbol;Acc:24700]
Q5SRE5	NUP188	nucleoporin 188kDa [Source:HGNC Symbol;Acc:17859]
Q5SRN2	C6orf10	chromosome 6 open reading frame 10 [Source:HGNC Symbol;Acc:13922]
Q5SVZ6	ZMYM1	zinc finger, MYM-type 1 [Source:HGNC Symbol;Acc:26253]
Q5SXM2	SNAPC4	small nuclear RNA activating complex, polypeptide 4, 190kDa [Source:HGNC Symbol;Acc:11137]
Q5T0W9	FAM83B	family with sequence similarity 83, member B [Source:HGNC Symbol;Acc:21357]
Q5T1B0	AXDND1	axonemal dynein light chain domain containing 1 [Source:HGNC Symbol;Acc:26564]
Q5T1M5	FKBP15	FK506 binding protein 15, 133kDa [Source:HGNC Symbol;Acc:23397]
Q5T2R2	PDSS1	prenyl (decaprenyl) diphosphate synthase, subunit 1 [Source:HGNC Symbol;Acc:17759]
Q5T3F8	TMEM63B	transmembrane protein 63B [Source:HGNC Symbol;Acc:17735]
Q5T3J3	LRIF1	ligand dependent nuclear receptor interacting factor 1 [Source:HGNC Symbol;Acc:30299]
Q5T4S7	UBR4	ubiquitin protein ligase E3 component n-recognin 4 [Source:HGNC Symbol;Acc:30313]
Q5T5U3	ARHGAP21	Rho GTPase activating protein 21 [Source:HGNC Symbol;Acc:23725]
Q5T653	MRPL2	mitochondrial ribosomal protein L2 [Source:HGNC Symbol;Acc:14056]
Q5T6C5	ATXN7L2	ataxin 7-like 2 [Source:HGNC Symbol;Acc:28713]
Q5T7M9	FAM69A	family with sequence similarity 69, member A [Source:HGNC Symbol;Acc:32213]
Q5T8A7	KIAA0649	KIAA0649 [Source:HGNC Symbol;Acc:29089]
Q5T8P6	RBM26	RNA binding motif protein 26 [Source:HGNC Symbol;Acc:20327]
Q5T9A4	ATAD3B	ATPase family, AAA domain containing 3B [Source:HGNC Symbol;Acc:24007]
Q5TA45	CPSF3L	cleavage and polyadenylation specific factor 3-like [Source:HGNC Symbol;Acc:26052]
Q5TFE4	NT5DC1	5'-nucleotidase domain containing 1 [Source:HGNC Symbol;Acc:21556]
Q5THJ4	VPS13D	vacuolar protein sorting 13 homolog D (S. cerevisiae) [Source:HGNC Symbol;Acc:23595]
Q5UIP0	RIF1	RAP1 interacting factor homolog (yeast) [Source:HGNC Symbol;Acc:23207]
Q5VIR6	VPS53	vacuolar protein sorting 53 homolog (S. cerevisiae) [Source:HGNC Symbol;Acc:25608]
Q5VTL8	PRPF38B	PRP38 pre-mRNA processing factor 38 (yeast) domain containing B [Source:HGNC Symbol;Acc:25512]
Q5VTR2	RNF20	ring finger protein 20 [Source:HGNC Symbol;Acc:10062]
Q5VU59
Q5VUA4	ZNF318	zinc finger protein 318 [Source:HGNC Symbol;Acc:13578]
Q5VW32	BROX	BRO1 domain and CAAX motif containing [Source:HGNC Symbol;Acc:26512]
Q5VW36	KIAA1797	KIAA1797 [Source:HGNC Symbol;Acc:23377]
Q5VWG9	TAF3	TAF3 RNA polymerase II, TATA box binding protein (TBP)-associated factor, 140kDa [Source:HGNC Symbol;Acc:17303]
Q5VWQ8	DAB2IP	DAB2 interacting protein [Source:HGNC Symbol;Acc:17294]
Q5VZ18	SHE	Src homology 2 domain containing E [Source:HGNC Symbol;Acc:27004]
Q659A1	NARG2	NMDA receptor regulated 2 [Source:HGNC Symbol;Acc:29885]
Q68CQ7	GLT8D1	glycosyltransferase 8 domain containing 1 [Source:HGNC Symbol;Acc:24870]
Q68D10	SPTY2D1	SPT2, Suppressor of Ty, domain containing 1 (S. cerevisiae) [Source:HGNC Symbol;Acc:26818]
Q68DK2	ZFYVE26	zinc finger, FYVE domain containing 26 [Source:HGNC Symbol;Acc:20761]
Q68EM7	ARHGAP17	Rho GTPase activating protein 17 [Source:HGNC Symbol;Acc:18239]
Q6DD88	ATL3	atlastin GTPase 3 [Source:HGNC Symbol;Acc:24526]
Q6FI13	HIST2H2AA3	histone cluster 2, H2aa3 [Source:HGNC Symbol;Acc:4736]
Q6FI81	CIAPIN1	cytokine induced apoptosis inhibitor 1 [Source:HGNC Symbol;Acc:28050]
Q6GYQ0	RALGAPA1	Ral GTPase activating protein, alpha subunit 1 (catalytic) [Source:HGNC Symbol;Acc:17770]
Q6I9Y2	THOC7	THO complex 7 homolog (Drosophila) [Source:HGNC Symbol;Acc:29874]
Q6IBS0	TWF2	twinfilin, actin-binding protein, homolog 2 (Drosophila) [Source:HGNC Symbol;Acc:9621]
Q6IMN6	CAPRIN2	caprin family member 2 [Source:HGNC Symbol;Acc:21259]
Q6IN85	SMEK1	SMEK homolog 1, suppressor of mek1 (Dictyostelium) [Source:HGNC Symbol;Acc:20219]
Q6IS24	WBSCR17	Williams-Beuren syndrome chromosome region 17 [Source:HGNC Symbol;Acc:16347]
Q6ISB3	GRHL2	grainyhead-like 2 (Drosophila) [Source:HGNC Symbol;Acc:2799]
Q6K0P9	PYHIN1	pyrin and HIN domain family, member 1 [Source:HGNC Symbol;Acc:28894]
Q6KC79	NIPBL	Nipped-B homolog (Drosophila) [Source:HGNC Symbol;Acc:28862]
Q6MZP7	LIN54	lin-54 homolog (C. elegans) [Source:HGNC Symbol;Acc:25397]
Q6N021	TET2	tet oncogene family member 2 [Source:HGNC Symbol;Acc:25941]
Q6NUK1	SLC25A24	solute carrier family 25 (mitochondrial carrier; phosphate carrier), member 24 [Source:HGNC Symbol;Acc:20662]
Q6NUP7	PPP4R4	protein phosphatase 4, regulatory subunit 4 [Source:HGNC Symbol;Acc:23788]
Q6NVY1	HIBCH	3-hydroxyisobutyryl-CoA hydrolase [Source:HGNC Symbol;Acc:4908]
Q6NWY9	PRPF40B	PRP40 pre-mRNA processing factor 40 homolog B (S. cerevisiae) [Source:HGNC Symbol;Acc:25031]
Q6NZI2	PTRF	polymerase I and transcript release factor [Source:HGNC Symbol;Acc:9688]
Q6P179	ERAP2	endoplasmic reticulum aminopeptidase 2 [Source:HGNC Symbol;Acc:29499]
Q6P1S2	C3orf33	chromosome 3 open reading frame 33 [Source:HGNC Symbol;Acc:26434]
Q6P2C0	WDR93	WD repeat domain 93 [Source:HGNC Symbol;Acc:26924]
Q6P2E9	EDC4	enhancer of mRNA decapping 4 [Source:HGNC Symbol;Acc:17157]
Q6P2Q9	PRPF8	PRP8 pre-mRNA processing factor 8 homolog (S. cerevisiae) [Source:HGNC Symbol;Acc:17340]
Q6P4A7	SFXN4	sideroflexin 4 [Source:HGNC Symbol;Acc:16088]
Q6P4F7	ARHGAP11A	Rho GTPase activating protein 11A [Source:HGNC Symbol;Acc:15783]
Q6P4R8	NFRKB	nuclear factor related to kappaB binding protein [Source:HGNC Symbol;Acc:7802]
Q6P6C2	ALKBH5	alkB, alkylation repair homolog 5 (E. coli) [Source:HGNC Symbol;Acc:25996]
Q6P9F7	LRRC8B	leucine rich repeat containing 8 family, member B [Source:HGNC Symbol;Acc:30692]
Q6PCB5	RSBN1L	round spermatid basic protein 1-like [Source:HGNC Symbol;Acc:24765]
Q6PI48	DARS2	aspartyl-tRNA synthetase 2, mitochondrial [Source:HGNC Symbol;Acc:25538]
Q6PIW4	FIGNL1	fidgetin-like 1 [Source:HGNC Symbol;Acc:13286]
Q6PKG0
Q6PL18	ATAD2	ATPase family, AAA domain containing 2 [Source:HGNC Symbol;Acc:30123]
Q6PL24	TMED8	transmembrane emp24 protein transport domain containing 8 [Source:HGNC Symbol;Acc:18633]
Q6PUV4	CPLX2	complexin 2 [Source:HGNC Symbol;Acc:2310]
Q6R327	RICTOR	RPTOR independent companion of MTOR, complex 2 [Source:HGNC Symbol;Acc:28611]
Q6UB98	ANKRD12	ankyrin repeat domain 12 [Source:HGNC Symbol;Acc:29135]
Q6UN15	FIP1L1	FIP1 like 1 (S. cerevisiae) [Source:HGNC Symbol;Acc:19124]
Q6UVJ0	SASS6	spindle assembly 6 homolog (C. elegans) [Source:HGNC Symbol;Acc:25403]
Q6UW68	TMEM205	transmembrane protein 205 [Source:HGNC Symbol;Acc:29631]
Q6UWP7	LCLAT1	lysocardiolipin acyltransferase 1 [Source:HGNC Symbol;Acc:26756]
Q6UXG2	KIAA1324	KIAA1324 [Source:HGNC Symbol;Acc:29618]
Q6UXN9	WDR82	WD repeat domain 82 [Source:HGNC Symbol;Acc:28826]
Q6VMQ6	ATF7IP	activating transcription factor 7 interacting protein [Source:HGNC Symbol;Acc:20092]
Q6W2J9	BCOR	BCL6 corepressor [Source:HGNC Symbol;Acc:20893]
Q6WRI0	IGSF10	immunoglobulin superfamily, member 10 [Source:HGNC Symbol;Acc:26384]
Q6YN16	HSDL2	hydroxysteroid dehydrogenase like 2 [Source:HGNC Symbol;Acc:18572]
Q6YP21	CCBL2	cysteine conjugate-beta lyase 2 [Source:HGNC Symbol;Acc:33238]
Q6ZMY6	WDR88	WD repeat domain 88 [Source:HGNC Symbol;Acc:26999]
Q6ZN06	ZNF813	zinc finger protein 813 [Source:HGNC Symbol;Acc:33257]
Q6ZN17	LIN28B	lin-28 homolog B (C. elegans) [Source:HGNC Symbol;Acc:32207]
Q6ZRI6	C15orf39	chromosome 15 open reading frame 39 [Source:HGNC Symbol;Acc:24497]
Q6ZTQ4	CDHR3	cadherin-related family member 3 [Source:HGNC Symbol;Acc:26308]
Q6ZU65	UBN2	ubinuclein 2 [Source:HGNC Symbol;Acc:21931]
Q6ZV73	FGD6	FYVE, RhoGEF and PH domain containing 6 [Source:HGNC Symbol;Acc:21740]
Q6ZVF9	GPRIN3	GPRIN family member 3 [Source:HGNC Symbol;Acc:27733]
Q709C8	VPS13C	vacuolar protein sorting 13 homolog C (S. cerevisiae) [Source:HGNC Symbol;Acc:23594]
Q709F0	ACAD11	acyl-CoA dehydrogenase family, member 11 [Source:HGNC Symbol;Acc:30211]
Q70CQ2	USP34	ubiquitin specific peptidase 34 [Source:HGNC Symbol;Acc:20066]
Q70J99	UNC13D	unc-13 homolog D (C. elegans) [Source:HGNC Symbol;Acc:23147]
Q71U36	TUBA1A	tubulin, alpha 1a [Source:HGNC Symbol;Acc:20766]
Q76FK4	NOL8	nucleolar protein 8 [Source:HGNC Symbol;Acc:23387]
Q76M96	CCDC80	coiled-coil domain containing 80 [Source:HGNC Symbol;Acc:30649]
Q7KZ85	SUPT6H	suppressor of Ty 6 homolog (S. cerevisiae) [Source:HGNC Symbol;Acc:11470]
Q7KZF4	SND1	staphylococcal nuclease and tudor domain containing 1 [Source:HGNC Symbol;Acc:30646]
Q7L014	DDX46	DEAD (Asp-Glu-Ala-Asp) box polypeptide 46 [Source:HGNC Symbol;Acc:18681]
Q7L099	RUFY3	RUN and FYVE domain containing 3 [Source:HGNC Symbol;Acc:30285]
Q7L2H7	EIF3M	eukaryotic translation initiation factor 3, subunit M [Source:HGNC Symbol;Acc:24460]
Q7L4P6	BEND5	BEN domain containing 5 [Source:HGNC Symbol;Acc:25668]
Q7L576	CYFIP1	cytoplasmic FMR1 interacting protein 1 [Source:HGNC Symbol;Acc:13759]
Q7L591	DOK3	docking protein 3 [Source:HGNC Symbol;Acc:24583]
Q7L7L0	HIST3H2A	histone cluster 3, H2a [Source:HGNC Symbol;Acc:20507]
Q7L8L6	FASTKD5	FAST kinase domains 5 [Source:HGNC Symbol;Acc:25790]
Q7LBC6	KDM3B	lysine (K)-specific demethylase 3B [Source:HGNC Symbol;Acc:1337]
Q7RTR0	NLRP9	NLR family, pyrin domain containing 9 [Source:HGNC Symbol;Acc:22941]
Q7RTS3	PTF1A	pancreas specific transcription factor, 1a [Source:HGNC Symbol;Acc:23734]
Q7Z333	SETX	senataxin [Source:HGNC Symbol;Acc:445]
Q7Z3B0	C5orf43	chromosome 5 open reading frame 43 [Source:HGNC Symbol;Acc:33861]
Q7Z3B3	KIAA1267	KIAA1267 [Source:HGNC Symbol;Acc:24565]
Q7Z3E2	C10orf118	chromosome 10 open reading frame 118 [Source:HGNC Symbol;Acc:24349]
Q7Z3K3	POGZ	pogo transposable element with ZNF domain [Source:HGNC Symbol;Acc:18801]
Q7Z417	NUFIP2	nuclear fragile X mental retardation protein interacting protein 2 [Source:HGNC Symbol;Acc:17634]
Q7Z4G1	COMMD6	COMM domain containing 6 [Source:HGNC Symbol;Acc:24015]
Q7Z4V5	AC011498.1	Hepatoma-derived growth factor-related protein 2 [Source:UniProtKB/Swiss-Prot;Acc:Q7Z4V5]
Q7Z5B4	RIC3	resistance to inhibitors of cholinesterase 3 homolog (C. elegans) [Source:HGNC Symbol;Acc:30338]
Q7Z5K2	WAPAL	wings apart-like homolog (Drosophila) [Source:HGNC Symbol;Acc:23293]
Q7Z6E9	RBBP6	retinoblastoma binding protein 6 [Source:HGNC Symbol;Acc:9889]
Q7Z6Z7	HUWE1	HECT, UBA and WWE domain containing 1 [Source:HGNC Symbol;Acc:30892]
Q7Z794	KRT77	keratin 77 [Source:HGNC Symbol;Acc:20411]
Q7Z7E8	UBE2Q1	ubiquitin-conjugating enzyme E2Q family member 1 [Source:HGNC Symbol;Acc:15698]
Q86SQ0	PHLDB2	pleckstrin homology-like domain, family B, member 2 [Source:HGNC Symbol;Acc:29573]
Q86SZ2	TRAPPC6B	trafficking protein particle complex 6B [Source:HGNC Symbol;Acc:23066]
Q86TI2	DPP9	dipeptidyl-peptidase 9 [Source:HGNC Symbol;Acc:18648]
Q86U42	PABPN1	poly(A) binding protein, nuclear 1 [Source:HGNC Symbol;Acc:8565]
Q86UA1	PRPF39	PRP39 pre-mRNA processing factor 39 homolog (S. cerevisiae) [Source:HGNC Symbol;Acc:20314]
Q86UP2	KTN1	kinectin 1 (kinesin receptor) [Source:HGNC Symbol;Acc:6467]
Q86UQ8
Q86UU0	BCL9L	B-cell CLL/lymphoma 9-like [Source:HGNC Symbol;Acc:23688]
Q86UV5	USP48	ubiquitin specific peptidase 48 [Source:HGNC Symbol;Acc:18533]
Q86UW9	AC005522.1	Protein deltex-2 [Source:UniProtKB/Swiss-Prot;Acc:Q86UW9]
Q86UY8	NT5DC3	5'-nucleotidase domain containing 3 [Source:HGNC Symbol;Acc:30826]
Q86VF7	NRAP	nebulin-related anchoring protein [Source:HGNC Symbol;Acc:7988]
Q86VH5	LRRTM3	leucine rich repeat transmembrane neuronal 3 [Source:HGNC Symbol;Acc:19410]
Q86VI3	IQGAP3	IQ motif containing GTPase activating protein 3 [Source:HGNC Symbol;Acc:20669]
Q86VM9	ZC3H18	zinc finger CCCH-type containing 18 [Source:HGNC Symbol;Acc:25091]
Q86VP6	CAND1	cullin-associated and neddylation-dissociated 1 [Source:HGNC Symbol;Acc:30688]
Q86VV8	RTTN	rotatin [Source:HGNC Symbol;Acc:18654]
Q86W56	PARG	poly (ADP-ribose) glycohydrolase [Source:HGNC Symbol;Acc:8605]
Q86W92	PPFIBP1	PTPRF interacting protein, binding protein 1 (liprin beta 1) [Source:HGNC Symbol;Acc:9249]
Q86WA6	BPHL	biphenyl hydrolase-like (serine hydrolase) [Source:HGNC Symbol;Acc:1094]
Q86WR0	CCDC25	coiled-coil domain containing 25 [Source:HGNC Symbol;Acc:25591]
Q86X53	ERICH1	glutamate-rich 1 [Source:HGNC Symbol;Acc:27234]
Q86XE3	EFHA2	EF-hand domain family, member A2 [Source:HGNC Symbol;Acc:27820]
Q86YV5	AC068353.1	Tyrosine-protein kinase SgK223 [Source:UniProtKB/Swiss-Prot;Acc:Q86YV5]
Q8IUD2	ERC1	ELKS/RAB6-interacting/CAST family member 1 [Source:HGNC Symbol;Acc:17072]
Q8IUF8	MINA	MYC induced nuclear antigen [Source:HGNC Symbol;Acc:19441]
Q8IUX7	AEBP1	AE binding protein 1 [Source:HGNC Symbol;Acc:303]
Q8IUX8	EGFL6	EGF-like-domain, multiple 6 [Source:HGNC Symbol;Acc:3235]
Q8IV01	SYT12	synaptotagmin XII [Source:HGNC Symbol;Acc:18381]
Q8IW93	ARHGEF19	Rho guanine nucleotide exchange factor (GEF) 19 [Source:HGNC Symbol;Acc:26604]
Q8IWA0	WDR75	WD repeat domain 75 [Source:HGNC Symbol;Acc:25725]
Q8IWT1	SCN4B	sodium channel, voltage-gated, type IV, beta [Source:HGNC Symbol;Acc:10592]
Q8IWU9	TPH2	tryptophan hydroxylase 2 [Source:HGNC Symbol;Acc:20692]
Q8IWX8	CHERP	calcium homeostasis endoplasmic reticulum protein [Source:HGNC Symbol;Acc:16930]
Q8IWY8	ZSCAN29	zinc finger and SCAN domain containing 29 [Source:HGNC Symbol;Acc:26673]
Q8IXI2	RHOT1	ras homolog gene family, member T1 [Source:HGNC Symbol;Acc:21168]
Q8IY18	SMC5	structural maintenance of chromosomes 5 [Source:HGNC Symbol;Acc:20465]
Q8IY81	FTSJ3	FtsJ homolog 3 (E. coli) [Source:HGNC Symbol;Acc:17136]
Q8IYB3	SRRM1	serine/arginine repetitive matrix 1 [Source:HGNC Symbol;Acc:16638]
Q8IYB8	SUPV3L1	suppressor of var1, 3-like 1 (S. cerevisiae) [Source:HGNC Symbol;Acc:11471]
Q8IYF1	TCEB3B	transcription elongation factor B polypeptide 3B (elongin A2) [Source:HGNC Symbol;Acc:30771]
Q8IYH5	ZZZ3	zinc finger, ZZ-type containing 3 [Source:HGNC Symbol;Acc:24523]
Q8IYQ7	THNSL1	threonine synthase-like 1 (S. cerevisiae) [Source:HGNC Symbol;Acc:26160]
Q8IYX8	CEP57L1	centrosomal protein 57kDa-like 1 [Source:HGNC Symbol;Acc:21561]
Q8IZC4	RTKN2	rhotekin 2 [Source:HGNC Symbol;Acc:19364]
Q8IZF0	NALCN	sodium leak channel, non-selective [Source:HGNC Symbol;Acc:19082]
Q8IZJ4	RGL4	ral guanine nucleotide dissociation stimulator-like 4 [Source:HGNC Symbol;Acc:31911]
Q8IZQ5	C11orf31	chromosome 11 open reading frame 31 [Source:HGNC Symbol;Acc:18251]
Q8IZS8	CACNA2D3	calcium channel, voltage-dependent, alpha 2/delta subunit 3 [Source:HGNC Symbol;Acc:15460]
Q8N0T1	C8orf59	chromosome 8 open reading frame 59 [Source:HGNC Symbol;Acc:32235]
Q8N0V4	LGI2	leucine-rich repeat LGI family, member 2 [Source:HGNC Symbol;Acc:18710]
Q8N103	TAGAP	T-cell activation RhoGTPase activating protein [Source:HGNC Symbol;Acc:15669]
Q8N163	KIAA1967	KIAA1967 [Source:HGNC Symbol;Acc:23360]
Q8N1G2	FTSJD2	FtsJ methyltransferase domain containing 2 [Source:HGNC Symbol;Acc:21077]
Q8N2C3	DEPDC4	DEP domain containing 4 [Source:HGNC Symbol;Acc:22952]
Q8N2W9	PIAS4	protein inhibitor of activated STAT, 4 [Source:HGNC Symbol;Acc:17002]
Q8N302	AGGF1	angiogenic factor with G patch and FHA domains 1 [Source:HGNC Symbol;Acc:24684]
Q8N393	ZNF786	zinc finger protein 786 [Source:HGNC Symbol;Acc:21806]
Q8N3A8	PARP8	poly (ADP-ribose) polymerase family, member 8 [Source:HGNC Symbol;Acc:26124]
Q8N3C0	ASCC3	activating signal cointegrator 1 complex subunit 3 [Source:HGNC Symbol;Acc:18697]
Q8N3J9	ZNF664	zinc finger protein 664 [Source:HGNC Symbol;Acc:25406]
Q8N4C7	STX19	syntaxin 19 [Source:HGNC Symbol;Acc:19300]
Q8N4P3	HDDC3	HD domain containing 3 [Source:HGNC Symbol;Acc:30522]
Q8N519
Q8N584	TTC39C	tetratricopeptide repeat domain 39C [Source:HGNC Symbol;Acc:26595]
Q8N5F7	NKAP	NFKB activating protein [Source:HGNC Symbol;Acc:29873]
Q8N5G2	TMEM57	transmembrane protein 57 [Source:HGNC Symbol;Acc:25572]
Q8N5Z0	AADAT	aminoadipate aminotransferase [Source:HGNC Symbol;Acc:17929]
Q8N688	DEFB123	defensin, beta 123 [Source:HGNC Symbol;Acc:18103]
Q8N6T3	ARFGAP1	ADP-ribosylation factor GTPase activating protein 1 [Source:HGNC Symbol;Acc:15852]
Q8N7X0	C6orf103	chromosome 6 open reading frame 103 [Source:HGNC Symbol;Acc:21212]
Q8N884	MB21D1	Mab-21 domain containing 1 [Source:HGNC Symbol;Acc:21367]
Q8N8A2	ANKRD44	ankyrin repeat domain 44 [Source:HGNC Symbol;Acc:25259]
Q8N954	CCDC75	coiled-coil domain containing 75 [Source:HGNC Symbol;Acc:26768]
Q8N9N5	BANP	BTG3 associated nuclear protein [Source:HGNC Symbol;Acc:13450]
Q8N9W6	BOLL	bol, boule-like (Drosophila) [Source:HGNC Symbol;Acc:14273]
Q8NA54	IQUB	IQ motif and ubiquitin domain containing [Source:HGNC Symbol;Acc:21995]
Q8NA72	POC5	POC5 centriolar protein homolog (Chlamydomonas) [Source:HGNC Symbol;Acc:26658]
Q8NAV1	PRPF38A	PRP38 pre-mRNA processing factor 38 (yeast) domain containing A [Source:HGNC Symbol;Acc:25930]
Q8NBU5	ATAD1	ATPase family, AAA domain containing 1 [Source:HGNC Symbol;Acc:25903]
Q8NC51	SERBP1	SERPINE1 mRNA binding protein 1 [Source:HGNC Symbol;Acc:17860]
Q8NCE2	MTMR14	myotubularin related protein 14 [Source:HGNC Symbol;Acc:26190]
Q8ND56	LSM14A	LSM14A, SCD6 homolog A (S. cerevisiae) [Source:HGNC Symbol;Acc:24489]
Q8NDD1	C1orf131	chromosome 1 open reading frame 131 [Source:HGNC Symbol;Acc:25332]
Q8NEH6	MNS1	meiosis-specific nuclear structural 1 [Source:HGNC Symbol;Acc:29636]
Q8NER1	TRPV1	transient receptor potential cation channel, subfamily V, member 1 [Source:HGNC Symbol;Acc:12716]
Q8NEY8	PPHLN1	periphilin 1 [Source:HGNC Symbol;Acc:19369]
Q8NEZ4	MLL3	myeloid/lymphoid or mixed-lineage leukemia 3 [Source:HGNC Symbol;Acc:13726]
Q8NEZ5	FBXO22	F-box protein 22 [Source:HGNC Symbol;Acc:13593]
Q8NFC6	BOD1L	biorientation of chromosomes in cell division 1-like [Source:HGNC Symbol;Acc:31792]
Q8NFD5	ARID1B	AT rich interactive domain 1B (SWI1-like) [Source:HGNC Symbol;Acc:18040]
Q8NFT6	DBF4B	DBF4 homolog B (S. cerevisiae) [Source:HGNC Symbol;Acc:17883]
Q8NFV4	ABHD11	abhydrolase domain containing 11 [Source:HGNC Symbol;Acc:16407]
Q8NGJ2	OR52H1	olfactory receptor, family 52, subfamily H, member 1 [Source:HGNC Symbol;Acc:15218]
Q8NGL9	OR4C16	olfactory receptor, family 4, subfamily C, member 16 [Source:HGNC Symbol;Acc:15172]
Q8NHH9	ATL2	atlastin GTPase 2 [Source:HGNC Symbol;Acc:24047]
Q8NHM5	KDM2B	lysine (K)-specific demethylase 2B [Source:HGNC Symbol;Acc:13610]
Q8NHQ9	DDX55	DEAD (Asp-Glu-Ala-Asp) box polypeptide 55 [Source:HGNC Symbol;Acc:20085]
Q8NI27	THOC2	THO complex 2 [Source:HGNC Symbol;Acc:19073]
Q8TAA5	GRPEL2	GrpE-like 2, mitochondrial (E. coli) [Source:HGNC Symbol;Acc:21060]
Q8TAF3	WDR48	WD repeat domain 48 [Source:HGNC Symbol;Acc:30914]
Q8TAP6	CEP76	centrosomal protein 76kDa [Source:HGNC Symbol;Acc:25727]
Q8TAQ2	SMARCC2	SWI/SNF related, matrix associated, actin dependent regulator of chromatin, subfamily c, member 2 [Source:HGNC Symbol;Acc:11105]
Q8TAV0	FAM76A	family with sequence similarity 76, member A [Source:HGNC Symbol;Acc:28530]
Q8TAX0	OSR1	odd-skipped related 1 (Drosophila) [Source:HGNC Symbol;Acc:8111]
Q8TB72	PUM2	pumilio homolog 2 (Drosophila) [Source:HGNC Symbol;Acc:14958]
Q8TBZ0	CCDC110	coiled-coil domain containing 110 [Source:HGNC Symbol;Acc:28504]
Q8TC12	RDH11	retinol dehydrogenase 11 (all-trans/9-cis/11-cis) [Source:HGNC Symbol;Acc:17964]
Q8TC84	FANK1	fibronectin type III and ankyrin repeat domains 1 [Source:HGNC Symbol;Acc:23527]
Q8TCS8	PNPT1	polyribonucleotide nucleotidyltransferase 1 [Source:HGNC Symbol;Acc:23166]
Q8TCU4	ALMS1	Alstrom syndrome 1 [Source:HGNC Symbol;Acc:428]
Q8TD19	NEK9	NIMA (never in mitosis gene a)- related kinase 9 [Source:HGNC Symbol;Acc:18591]
Q8TD26	CHD6	chromodomain helicase DNA binding protein 6 [Source:HGNC Symbol;Acc:19057]
Q8TD57	DNAH3	dynein, axonemal, heavy chain 3 [Source:HGNC Symbol;Acc:2949]
Q8TDJ6	DMXL2	Dmx-like 2 [Source:HGNC Symbol;Acc:2938]
Q8TDN6	BRIX1	BRX1, biogenesis of ribosomes, homolog (S. cerevisiae) [Source:HGNC Symbol;Acc:24170]
Q8TE73	DNAH5	dynein, axonemal, heavy chain 5 [Source:HGNC Symbol;Acc:2950]
Q8TEA1	NSUN6	NOP2/Sun domain family, member 6 [Source:HGNC Symbol;Acc:23529]
Q8TEA8	DTD1	D-tyrosyl-tRNA deacylase 1 homolog (S. cerevisiae) [Source:HGNC Symbol;Acc:16219]
Q8TEQ6	GEMIN5	gem (nuclear organelle) associated protein 5 [Source:HGNC Symbol;Acc:20043]
Q8TET4	GANC	glucosidase, alpha; neutral C [Source:HGNC Symbol;Acc:4139]
Q8TEW0	PARD3	par-3 partitioning defective 3 homolog (C. elegans) [Source:HGNC Symbol;Acc:16051]
Q8TF32	ZNF431	zinc finger protein 431 [Source:HGNC Symbol;Acc:20809]
Q8TF74	WIPF2	WAS/WASL interacting protein family, member 2 [Source:HGNC Symbol;Acc:30923]
Q8WUJ3	KIAA1199	KIAA1199 [Source:HGNC Symbol;Acc:29213]
Q8WV07	ORAOV1	oral cancer overexpressed 1 [Source:HGNC Symbol;Acc:17589]
Q8WV24	PHLDA1	pleckstrin homology-like domain, family A, member 1 [Source:HGNC Symbol;Acc:8933]
Q8WV41	SNX33	sorting nexin 33 [Source:HGNC Symbol;Acc:28468]
Q8WVD3	RNF138	ring finger protein 138 [Source:HGNC Symbol;Acc:17765]
Q8WVW5
Q8WVY7	UBLCP1	ubiquitin-like domain containing CTD phosphatase 1 [Source:HGNC Symbol;Acc:28110]
Q8WW12	PCNP	PEST proteolytic signal containing nuclear protein [Source:HGNC Symbol;Acc:30023]
Q8WW59	SPRYD4	SPRY domain containing 4 [Source:HGNC Symbol;Acc:27468]
Q8WWC4	C2orf47	chromosome 2 open reading frame 47 [Source:HGNC Symbol;Acc:26198]
Q8WWM7	ATXN2L	ataxin 2-like [Source:HGNC Symbol;Acc:31326]
Q8WWQ0	PHIP	pleckstrin homology domain interacting protein [Source:HGNC Symbol;Acc:15673]
Q8WX92	COBRA1	cofactor of BRCA1 [Source:HGNC Symbol;Acc:24324]
Q8WXF1	PSPC1	paraspeckle component 1 [Source:HGNC Symbol;Acc:20320]
Q8WXG9	GPR98	G protein-coupled receptor 98 [Source:HGNC Symbol;Acc:17416]
Q8WXH0	SYNE2	spectrin repeat containing, nuclear envelope 2 [Source:HGNC Symbol;Acc:17084]
Q8WXK1	ASB15	ankyrin repeat and SOCS box containing 15 [Source:HGNC Symbol;Acc:19767]
Q8WXS8	ADAMTS14	ADAM metallopeptidase with thrombospondin type 1 motif, 14 [Source:HGNC Symbol;Acc:14899]
Q8WXX0	DNAH7	dynein, axonemal, heavy chain 7 [Source:HGNC Symbol;Acc:18661]
Q8WY22	BRI3BP	BRI3 binding protein [Source:HGNC Symbol;Acc:14251]
Q8WYA0	IFT81	intraflagellar transport 81 homolog (Chlamydomonas) [Source:HGNC Symbol;Acc:14313]
Q8WYA6	CTNNBL1	catenin, beta like 1 [Source:HGNC Symbol;Acc:15879]
Q8WYB5	KAT6B	K(lysine) acetyltransferase 6B [Source:HGNC Symbol;Acc:17582]
Q8WYH8	ING5	inhibitor of growth family, member 5 [Source:HGNC Symbol;Acc:19421]
Q8WYQ9	ZCCHC14	zinc finger, CCHC domain containing 14 [Source:HGNC Symbol;Acc:24134]
Q92466	DDB2	damage-specific DNA binding protein 2, 48kDa [Source:HGNC Symbol;Acc:2718]
Q92499	DDX1	DEAD (Asp-Glu-Ala-Asp) box polypeptide 1 [Source:HGNC Symbol;Acc:2734]
Q92508	FAM38A	family with sequence similarity 38, member A [Source:HGNC Symbol;Acc:28993]
Q92522	H1FX	H1 histone family, member X [Source:HGNC Symbol;Acc:4722]
Q92523	CPT1B	carnitine palmitoyltransferase 1B (muscle) [Source:HGNC Symbol;Acc:2329]
Q92526	CCT6B	chaperonin containing TCP1, subunit 6B (zeta 2) [Source:HGNC Symbol;Acc:1621]
Q92541	RTF1	Rtf1, Paf1/RNA polymerase II complex component, homolog (S. cerevisiae) [Source:HGNC Symbol;Acc:28996]
Q92547	TOPBP1	topoisomerase (DNA) II binding protein 1 [Source:HGNC Symbol;Acc:17008]
Q92556	ELMO1	engulfment and cell motility 1 [Source:HGNC Symbol;Acc:16286]
Q92585	MAML1	mastermind-like 1 (Drosophila) [Source:HGNC Symbol;Acc:13632]
Q92598	HSPH1	heat shock 105kDa/110kDa protein 1 [Source:HGNC Symbol;Acc:16969]
Q92599	2012-09-08	septin 8 [Source:HGNC Symbol;Acc:16511]
Q92608	DOCK2	dedicator of cytokinesis 2 [Source:HGNC Symbol;Acc:2988]
Q92613	PHF16	PHD finger protein 16 [Source:HGNC Symbol;Acc:22982]
Q92616	GCN1L1	GCN1 general control of amino-acid synthesis 1-like 1 (yeast) [Source:HGNC Symbol;Acc:4199]
Q92620	DHX38	DEAH (Asp-Glu-Ala-His) box polypeptide 38 [Source:HGNC Symbol;Acc:17211]
Q92621	NUP205	nucleoporin 205kDa [Source:HGNC Symbol;Acc:18658]
Q92664	GTF3A	general transcription factor IIIA [Source:HGNC Symbol;Acc:4662]
Q92688	ANP32B	acidic (leucine-rich) nuclear phosphoprotein 32 family, member B [Source:HGNC Symbol;Acc:16677]
Q92769	HDAC2	histone deacetylase 2 [Source:HGNC Symbol;Acc:4853]
Q92793	CREBBP	CREB binding protein [Source:HGNC Symbol;Acc:2348]
Q92794	KAT6A	K(lysine) acetyltransferase 6A [Source:HGNC Symbol;Acc:13013]
Q92804	TAF15	TAF15 RNA polymerase II, TATA box binding protein (TBP)-associated factor, 68kDa [Source:HGNC Symbol;Acc:11547]
Q92831	KAT2B	K(lysine) acetyltransferase 2B [Source:HGNC Symbol;Acc:8638]
Q92833	JARID2	jumonji, AT rich interactive domain 2 [Source:HGNC Symbol;Acc:6196]
Q92835	INPP5D	inositol polyphosphate-5-phosphatase, 145kDa [Source:HGNC Symbol;Acc:6079]
Q92841	DDX17	DEAD (Asp-Glu-Ala-Asp) box polypeptide 17 [Source:HGNC Symbol;Acc:2740]
Q92878	RAD50	RAD50 homolog (S. cerevisiae) [Source:HGNC Symbol;Acc:9816]
Q92879	CELF1	CUGBP, Elav-like family member 1 [Source:HGNC Symbol;Acc:2549]
Q92889	ERCC4	excision repair cross-complementing rodent repair deficiency, complementation group 4 [Source:HGNC Symbol;Acc:3436]
Q92905	COPS5	COP9 constitutive photomorphogenic homolog subunit 5 (Arabidopsis) [Source:HGNC Symbol;Acc:2240]
Q92917	GPKOW	G patch domain and KOW motifs [Source:HGNC Symbol;Acc:30677]
Q92922	SMARCC1	SWI/SNF related, matrix associated, actin dependent regulator of chromatin, subfamily c, member 1 [Source:HGNC Symbol;Acc:11104]
Q92932	PTPRN2	protein tyrosine phosphatase, receptor type, N polypeptide 2 [Source:HGNC Symbol;Acc:9677]
Q92934	BAD	BCL2-associated agonist of cell death [Source:HGNC Symbol;Acc:936]
Q92945	KHSRP	KH-type splicing regulatory protein [Source:HGNC Symbol;Acc:6316]
Q92985	IRF7	interferon regulatory factor 7 [Source:HGNC Symbol;Acc:6122]
Q92993	KAT5	K(lysine) acetyltransferase 5 [Source:HGNC Symbol;Acc:5275]
Q93099	HGD	homogentisate 1,2-dioxygenase [Source:HGNC Symbol;Acc:4892]
Q969S2	NEIL2	nei endonuclease VIII-like 2 (E. coli) [Source:HGNC Symbol;Acc:18956]
Q969S9	GFM2	G elongation factor, mitochondrial 2 [Source:HGNC Symbol;Acc:29682]
Q969T7	NT5C3L	5'-nucleotidase, cytosolic III-like [Source:HGNC Symbol;Acc:28300]
Q969Z0	TBRG4	transforming growth factor beta regulator 4 [Source:HGNC Symbol;Acc:17443]
Q96A08	HIST1H2BA	histone cluster 1, H2ba [Source:HGNC Symbol;Acc:18730]
Q96A49	SYAP1	synapse associated protein 1 [Source:HGNC Symbol;Acc:16273]
Q96A65	EXOC4	exocyst complex component 4 [Source:HGNC Symbol;Acc:30389]
Q96A72	MAGOHB	mago-nashi homolog B (Drosophila) [Source:HGNC Symbol;Acc:25504]
Q96AB3	ISOC2	isochorismatase domain containing 2 [Source:HGNC Symbol;Acc:26278]
Q96AB6	NTAN1	N-terminal asparagine amidase [Source:HGNC Symbol;Acc:29909]
Q96AE4	FUBP1	far upstream element (FUSE) binding protein 1 [Source:HGNC Symbol;Acc:4004]
Q96AG4	LRRC59	leucine rich repeat containing 59 [Source:HGNC Symbol;Acc:28817]
Q96AP4	ZUFSP	zinc finger with UFM1-specific peptidase domain [Source:HGNC Symbol;Acc:21224]
Q96AT1	KIAA1143	KIAA1143 [Source:HGNC Symbol;Acc:29198]
Q96B01	RAD51AP1	RAD51 associated protein 1 [Source:HGNC Symbol;Acc:16956]
Q96BJ3	AIDA	axin interactor, dorsalization associated [Source:HGNC Symbol;Acc:25761]
Q96BY6	DOCK10	dedicator of cytokinesis 10 [Source:HGNC Symbol;Acc:23479]
Q96C86	DCPS	decapping enzyme, scavenger [Source:HGNC Symbol;Acc:29812]
Q96CM8	ACSF2	acyl-CoA synthetase family member 2 [Source:HGNC Symbol;Acc:26101]
Q96CN7	ISOC1	isochorismatase domain containing 1 [Source:HGNC Symbol;Acc:24254]
Q96CS3	FAF2	Fas associated factor family member 2 [Source:HGNC Symbol;Acc:24666]
Q96CU9	FOXRED1	FAD-dependent oxidoreductase domain containing 1 [Source:HGNC Symbol;Acc:26927]
Q96CV9	OPTN	optineurin [Source:HGNC Symbol;Acc:17142]
Q96DA6	DNAJC19	DnaJ (Hsp40) homolog, subfamily C, member 19 [Source:HGNC Symbol;Acc:30528]
Q96DB5	FAM82B	family with sequence similarity 82, member B [Source:HGNC Symbol;Acc:24285]
Q96DG6	CMBL	carboxymethylenebutenolidase homolog (Pseudomonas) [Source:HGNC Symbol;Acc:25090]
Q96DM1	PGBD4	piggyBac transposable element derived 4 [Source:HGNC Symbol;Acc:19401]
Q96DN6	MBD6	methyl-CpG binding domain protein 6 [Source:HGNC Symbol;Acc:20445]
Q96EK5	KIAA1279	KIAA1279 [Source:HGNC Symbol;Acc:23419]
Q96EP5	DAZAP1	DAZ associated protein 1 [Source:HGNC Symbol;Acc:2683]
Q96ER9	CCDC51	coiled-coil domain containing 51 [Source:HGNC Symbol;Acc:25714]
Q96EV8	DTNBP1	dystrobrevin binding protein 1 [Source:HGNC Symbol;Acc:17328]
Q96EY7	PTCD3	Pentatricopeptide repeat domain 3 [Source:HGNC Symbol;Acc:24717]
Q96EZ8	MCRS1	microspherule protein 1 [Source:HGNC Symbol;Acc:6960]
Q96F07	CYFIP2	cytoplasmic FMR1 interacting protein 2 [Source:HGNC Symbol;Acc:13760]
Q96F10	SAT2	spermidine/spermine N1-acetyltransferase family member 2 [Source:HGNC Symbol;Acc:23160]
Q96FV9	THOC1	THO complex 1 [Source:HGNC Symbol;Acc:19070]
Q96G03	PGM2	phosphoglucomutase 2 [Source:HGNC Symbol;Acc:8906]
Q96GD3	SCMH1	sex comb on midleg homolog 1 (Drosophila) [Source:HGNC Symbol;Acc:19003]
Q96GK7	FAHD2A	fumarylacetoacetate hydrolase domain containing 2A [Source:HGNC Symbol;Acc:24252]
Q96GX9	APIP	APAF1 interacting protein [Source:HGNC Symbol;Acc:17581]
Q96HS1	PGAM5	phosphoglycerate mutase family member 5 [Source:HGNC Symbol;Acc:28763]
Q96HY7	DHTKD1	dehydrogenase E1 and transketolase domain containing 1 [Source:HGNC Symbol;Acc:23537]
Q96I25	RBM17	RNA binding motif protein 17 [Source:HGNC Symbol;Acc:16944]
Q96I59	NARS2	asparaginyl-tRNA synthetase 2, mitochondrial (putative) [Source:HGNC Symbol;Acc:26274]
Q96I99	SUCLG2	succinate-CoA ligase, GDP-forming, beta subunit [Source:HGNC Symbol;Acc:11450]
Q96JB2	COG3	component of oligomeric golgi complex 3 [Source:HGNC Symbol;Acc:18619]
Q96JC9	EAF1	ELL associated factor 1 [Source:HGNC Symbol;Acc:20907]
Q96JH7	VCPIP1	valosin containing protein (p97)/p47 complex interacting protein 1 [Source:HGNC Symbol;Acc:30897]
Q96JK9	MAML3	mastermind-like 3 (Drosophila) [Source:HGNC Symbol;Acc:16272]
Q96JM3	ZNF828	zinc finger protein 828 [Source:HGNC Symbol;Acc:20311]
Q96JY6	PDLIM2	PDZ and LIM domain 2 (mystique) [Source:HGNC Symbol;Acc:13992]
Q96K76	USP47	ubiquitin specific peptidase 47 [Source:HGNC Symbol;Acc:20076]
Q96KB5	PBK	PDZ binding kinase [Source:HGNC Symbol;Acc:18282]
Q96KD3	FAM71F1	family with sequence similarity 71, member F1 [Source:HGNC Symbol;Acc:30704]
Q96KF7	C6orf162	chromosome 6 open reading frame 162 [Source:HGNC Symbol;Acc:21401]
Q96KP1	EXOC2	exocyst complex component 2 [Source:HGNC Symbol;Acc:24968]
Q96KP4	CNDP2	CNDP dipeptidase 2 (metallopeptidase M20 family) [Source:HGNC Symbol;Acc:24437]
Q96KR1	ZFR	zinc finger RNA binding protein [Source:HGNC Symbol;Acc:17277]
Q96L73	NSD1	nuclear receptor binding SET domain protein 1 [Source:HGNC Symbol;Acc:14234]
Q96L91	EP400	E1A binding protein p400 [Source:HGNC Symbol;Acc:11958]
Q96LB3	IFT74	intraflagellar transport 74 homolog (Chlamydomonas) [Source:HGNC Symbol;Acc:21424]
Q96LD4	TRIM47	tripartite motif containing 47 [Source:HGNC Symbol;Acc:19020]
Q96LR5	UBE2E2	ubiquitin-conjugating enzyme E2E 2 [Source:HGNC Symbol;Acc:12478]
Q96M91	CCDC11	coiled-coil domain containing 11 [Source:HGNC Symbol;Acc:26530]
Q96MC2	CCDC164	coiled-coil domain containing 164 [Source:HGNC Symbol;Acc:24245]
Q96MV1	TMEM56	transmembrane protein 56 [Source:HGNC Symbol;Acc:26477]
Q96MY7	FAM161B	family with sequence similarity 161, member B [Source:HGNC Symbol;Acc:19854]
Q96N67	DOCK7	dedicator of cytokinesis 7 [Source:HGNC Symbol;Acc:19190]
Q96PD2	DCBLD2	discoidin, CUB and LCCL domain containing 2 [Source:HGNC Symbol;Acc:24627]
Q96PE7	MCEE	methylmalonyl CoA epimerase [Source:HGNC Symbol;Acc:16732]
Q96PN8	TSSK3	testis-specific serine kinase 3 [Source:HGNC Symbol;Acc:15473]
Q96PP9	GBP4	guanylate binding protein 4 [Source:HGNC Symbol;Acc:20480]
Q96PZ0	PUS7	pseudouridylate synthase 7 homolog (S. cerevisiae) [Source:HGNC Symbol;Acc:26033]
Q96Q11	TRNT1	tRNA nucleotidyl transferase, CCA-adding, 1 [Source:HGNC Symbol;Acc:17341]
Q96Q15	SMG1	smg-1 homolog, phosphatidylinositol 3-kinase-related kinase (C. elegans) [Source:HGNC Symbol;Acc:30045]
Q96Q27	ASB2	ankyrin repeat and SOCS box containing 2 [Source:HGNC Symbol;Acc:16012]
Q96Q35	ALS2CR12	amyotrophic lateral sclerosis 2 (juvenile) chromosome region, candidate 12 [Source:HGNC Symbol;Acc:14439]
Q96Q42	ALS2	amyotrophic lateral sclerosis 2 (juvenile) [Source:HGNC Symbol;Acc:443]
Q96QC0	PPP1R10	protein phosphatase 1, regulatory (inhibitor) subunit 10 [Source:HGNC Symbol;Acc:9284]
Q96QF0	RAB3IP	RAB3A interacting protein (rabin3) [Source:HGNC Symbol;Acc:16508]
Q96QH2	PRAM1	PML-RARA regulated adaptor molecule 1 [Source:HGNC Symbol;Acc:30091]
Q96QK1	VPS35	vacuolar protein sorting 35 homolog (S. cerevisiae) [Source:HGNC Symbol;Acc:13487]
Q96QV6	HIST1H2AA	histone cluster 1, H2aa [Source:HGNC Symbol;Acc:18729]
Q96R06	SPAG5	sperm associated antigen 5 [Source:HGNC Symbol;Acc:13452]
Q96RP9	GFM1	G elongation factor, mitochondrial 1 [Source:HGNC Symbol;Acc:13780]
Q96RQ3	MCCC1	methylcrotonoyl-CoA carboxylase 1 (alpha) [Source:HGNC Symbol;Acc:6936]
Q96RU3	FNBP1	formin binding protein 1 [Source:HGNC Symbol;Acc:17069]
Q96RW7	HMCN1	hemicentin 1 [Source:HGNC Symbol;Acc:19194]
Q96S55	WRNIP1	Werner helicase interacting protein 1 [Source:HGNC Symbol;Acc:20876]
Q96S59	RANBP9	RAN binding protein 9 [Source:HGNC Symbol;Acc:13727]
Q96S99	PLEKHF1	pleckstrin homology domain containing, family F (with FYVE domain) member 1 [Source:HGNC Symbol;Acc:20764]
Q96SB3
Q96SB4	SRPK1	SRSF protein kinase 1 [Source:HGNC Symbol;Acc:11305]
Q96SD1	DCLRE1C	DNA cross-link repair 1C [Source:HGNC Symbol;Acc:17642]
Q96SI9	STRBP	spermatid perinuclear RNA binding protein [Source:HGNC Symbol;Acc:16462]
Q96ST3	SIN3A	SIN3 homolog A, transcription regulator (yeast) [Source:HGNC Symbol;Acc:19353]
Q96SY0	C15orf44	chromosome 15 open reading frame 44 [Source:HGNC Symbol;Acc:25372]
Q96T17	MAP7D2	MAP7 domain containing 2 [Source:HGNC Symbol;Acc:25899]
Q96T23	RSF1	remodeling and spacing factor 1 [Source:HGNC Symbol;Acc:18118]
Q96T37	RBM15	RNA binding motif protein 15 [Source:HGNC Symbol;Acc:14959]
Q96T76	MMS19	MMS19 nucleotide excision repair homolog (S. cerevisiae) [Source:HGNC Symbol;Acc:13824]
Q96TA2	YME1L1	YME1-like 1 (S. cerevisiae) [Source:HGNC Symbol;Acc:12843]
Q99426	TBCB	tubulin folding cofactor B [Source:HGNC Symbol;Acc:1989]
Q99439	CNN2	calponin 2 [Source:HGNC Symbol;Acc:2156]
Q99459	CDC5L	CDC5 cell division cycle 5-like (S. pombe) [Source:HGNC Symbol;Acc:1743]
Q99460	PSMD1	proteasome (prosome, macropain) 26S subunit, non-ATPase, 1 [Source:HGNC Symbol;Acc:9554]
Q99471	PFDN5	prefoldin subunit 5 [Source:HGNC Symbol;Acc:8869]
Q99487	PAFAH2	platelet-activating factor acetylhydrolase 2, 40kDa [Source:HGNC Symbol;Acc:8579]
Q99496	RNF2	ring finger protein 2 [Source:HGNC Symbol;Acc:10061]
Q99497	PARK7	parkinson protein 7 [Source:HGNC Symbol;Acc:16369]
Q99525	HIST1H4G	histone cluster 1, H4g [Source:HGNC Symbol;Acc:4792]
Q99549	MPHOSPH8	M-phase phosphoprotein 8 [Source:HGNC Symbol;Acc:29810]
Q99569	PKP4	plakophilin 4 [Source:HGNC Symbol;Acc:9026]
Q99575	POP1	processing of precursor 1, ribonuclease P/MRP subunit (S. cerevisiae) [Source:HGNC Symbol;Acc:30129]
Q99598	TSNAX	translin-associated factor X [Source:HGNC Symbol;Acc:12380]
Q99612	KLF6	Kruppel-like factor 6 [Source:HGNC Symbol;Acc:2235]
Q99613	EIF3C	eukaryotic translation initiation factor 3, subunit C [Source:HGNC Symbol;Acc:3279]
Q99623	PHB2	prohibitin 2 [Source:HGNC Symbol;Acc:30306]
Q99741	CDC6	cell division cycle 6 homolog (S. cerevisiae) [Source:HGNC Symbol;Acc:1744]
Q99750	MDFI	MyoD family inhibitor [Source:HGNC Symbol;Acc:6967]
Q99757	TXN2	thioredoxin 2 [Source:HGNC Symbol;Acc:17772]
Q99766	ATP5S	ATP synthase, H+ transporting, mitochondrial Fo complex, subunit s (factor B) [Source:HGNC Symbol;Acc:18799]
Q99797	MIPEP	mitochondrial intermediate peptidase [Source:HGNC Symbol;Acc:7104]
Q99798	ACO2	aconitase 2, mitochondrial [Source:HGNC Symbol;Acc:118]
Q99816	TSG101	tumor susceptibility gene 101 [Source:HGNC Symbol;Acc:15971]
Q99829	RBM12	RNA binding motif protein 12 [Source:HGNC Symbol;Acc:9898]
Q99832	CCT7	chaperonin containing TCP1, subunit 7 (eta) [Source:HGNC Symbol;Acc:1622]
Q99879	HIST1H2BM	histone cluster 1, H2bm [Source:HGNC Symbol;Acc:4750]
Q99880	HIST1H2BL	histone cluster 1, H2bl [Source:HGNC Symbol;Acc:4748]
Q9BPW8	NIPSNAP1	nipsnap homolog 1 (C. elegans) [Source:HGNC Symbol;Acc:7827]
Q9BQ61	C19orf43	chromosome 19 open reading frame 43 [Source:HGNC Symbol;Acc:28424]
Q9BQ69	MACROD1	MACRO domain containing 1 [Source:HGNC Symbol;Acc:29598]
Q9BQE3	TUBA1C	tubulin, alpha 1c [Source:HGNC Symbol;Acc:20768]
Q9BQG0	MYBBP1A	MYB binding protein (P160) 1a [Source:HGNC Symbol;Acc:7546]
Q9BR76	CORO1B	coronin, actin binding protein, 1B [Source:HGNC Symbol;Acc:2253]
Q9BRA2	TXNDC17	thioredoxin domain containing 17 [Source:HGNC Symbol;Acc:28218]
Q9BRR8	GPATCH1	G patch domain containing 1 [Source:HGNC Symbol;Acc:24658]
Q9BSD7	NTPCR	nucleoside-triphosphatase, cancer-related [Source:HGNC Symbol;Acc:28204]
Q9BSH4	TACO1	translational activator of mitochondrially encoded cytochrome c oxidase I [Source:HGNC Symbol;Acc:24316]
Q9BSH5	HDHD3	haloacid dehalogenase-like hydrolase domain containing 3 [Source:HGNC Symbol;Acc:28171]
Q9BSJ2	TUBGCP2	tubulin, gamma complex associated protein 2 [Source:HGNC Symbol;Acc:18599]
Q9BSJ8	ESYT1	extended synaptotagmin-like protein 1 [Source:HGNC Symbol;Acc:29534]
Q9BT78	COPS4	COP9 constitutive photomorphogenic homolog subunit 4 (Arabidopsis) [Source:HGNC Symbol;Acc:16702]
Q9BTA9	WAC	WW domain containing adaptor with coiled-coil [Source:HGNC Symbol;Acc:17327]
Q9BTC0	DIDO1	death inducer-obliterator 1 [Source:HGNC Symbol;Acc:2680]
Q9BTE1	DCTN5	dynactin 5 (p25) [Source:HGNC Symbol;Acc:24594]
Q9BTE3	MCMBP	minichromosome maintenance complex binding protein [Source:HGNC Symbol;Acc:25782]
Q9BTK6	C16orf53	chromosome 16 open reading frame 53 [Source:HGNC Symbol;Acc:28707]
Q9BU76	C1orf35	chromosome 1 open reading frame 35 [Source:HGNC Symbol;Acc:19032]
Q9BUJ2	HNRNPUL1	heterogeneous nuclear ribonucleoprotein U-like 1 [Source:HGNC Symbol;Acc:17011]
Q9BUL8	PDCD10	programmed cell death 10 [Source:HGNC Symbol;Acc:8761]
Q9BUT1	BDH2	3-hydroxybutyrate dehydrogenase, type 2 [Source:HGNC Symbol;Acc:32389]
Q9BV73	CEP250	centrosomal protein 250kDa [Source:HGNC Symbol;Acc:1859]
Q9BVI0	PHF20	PHD finger protein 20 [Source:HGNC Symbol;Acc:16098]
Q9BVP2	GNL3	guanine nucleotide binding protein-like 3 (nucleolar) [Source:HGNC Symbol;Acc:29931]
Q9BW61	DDA1	DET1 and DDB1 associated 1 [Source:HGNC Symbol;Acc:28360]
Q9BWD1	ACAT2	acetyl-CoA acetyltransferase 2 [Source:HGNC Symbol;Acc:94]
Q9BWJ5	SF3B5	splicing factor 3b, subunit 5, 10kDa [Source:HGNC Symbol;Acc:21083]
Q9BWU0	SLC4A1AP	solute carrier family 4 (anion exchanger), member 1, adaptor protein [Source:HGNC Symbol;Acc:13813]
Q9BX66	SORBS1	sorbin and SH3 domain containing 1 [Source:HGNC Symbol;Acc:14565]
Q9BX84	TRPM6	transient receptor potential cation channel, subfamily M, member 6 [Source:HGNC Symbol;Acc:17995]
Q9BXJ9	NAA15	N(alpha)-acetyltransferase 15, NatA auxiliary subunit [Source:HGNC Symbol;Acc:30782]
Q9BXS6	NUSAP1	nucleolar and spindle associated protein 1 [Source:HGNC Symbol;Acc:18538]
Q9BXW7	CECR5	cat eye syndrome chromosome region, candidate 5 [Source:HGNC Symbol;Acc:1843]
Q9BYD2	MRPL9	mitochondrial ribosomal protein L9 [Source:HGNC Symbol;Acc:14277]
Q9BYJ0	FGFBP2	fibroblast growth factor binding protein 2 [Source:HGNC Symbol;Acc:29451]
Q9BYP7	WNK3	WNK lysine deficient protein kinase 3 [Source:HGNC Symbol;Acc:14543]
Q9BYT8	NLN	neurolysin (metallopeptidase M3 family) [Source:HGNC Symbol;Acc:16058]
Q9BYV1	AGXT2	alanine--glyoxylate aminotransferase 2 [Source:HGNC Symbol;Acc:14412]
Q9BYV2	TRIM54	tripartite motif containing 54 [Source:HGNC Symbol;Acc:16008]
Q9BZ95	WHSC1L1	Wolf-Hirschhorn syndrome candidate 1-like 1 [Source:HGNC Symbol;Acc:12767]
Q9BZE1	MRPL37	mitochondrial ribosomal protein L37 [Source:HGNC Symbol;Acc:14034]
Q9BZE4	GTPBP4	GTP binding protein 4 [Source:HGNC Symbol;Acc:21535]
Q9BZF1	OSBPL8	oxysterol binding protein-like 8 [Source:HGNC Symbol;Acc:16396]
Q9BZF9	UACA	uveal autoantigen with coiled-coil domains and ankyrin repeats [Source:HGNC Symbol;Acc:15947]
Q9BZI7	UPF3B	UPF3 regulator of nonsense transcripts homolog B (yeast) [Source:HGNC Symbol;Acc:20439]
Q9BZJ0	CRNKL1	crooked neck pre-mRNA splicing factor-like 1 (Drosophila) [Source:HGNC Symbol;Acc:15762]
Q9BZK7	TBL1XR1	transducin (beta)-like 1 X-linked receptor 1 [Source:HGNC Symbol;Acc:29529]
Q9BZW7	TSGA10	testis specific, 10 [Source:HGNC Symbol;Acc:14927]
Q9BZZ5	API5	apoptosis inhibitor 5 [Source:HGNC Symbol;Acc:594]
Q9C005	DPY30	dpy-30 homolog (C. elegans) [Source:HGNC Symbol;Acc:24590]
Q9C093	SPEF2	sperm flagellar 2 [Source:HGNC Symbol;Acc:26293]
Q9C0B1	FTO	fat mass and obesity associated [Source:HGNC Symbol;Acc:24678]
Q9C0B2	C1orf222	chromosome 1 open reading frame 222 [Source:HGNC Symbol;Acc:27917]
Q9C0J8	WDR33	WD repeat domain 33 [Source:HGNC Symbol;Acc:25651]
Q9C0K0	BCL11B	B-cell CLL/lymphoma 11B (zinc finger protein) [Source:HGNC Symbol;Acc:13222]
Q9GZN1	ACTR6	ARP6 actin-related protein 6 homolog (yeast) [Source:HGNC Symbol;Acc:24025]
Q9GZR7	DDX24	DEAD (Asp-Glu-Ala-Asp) box polypeptide 24 [Source:HGNC Symbol;Acc:13266]
Q9GZS1	POLR1E	polymerase (RNA) I polypeptide E, 53kDa [Source:HGNC Symbol;Acc:17631]
Q9GZT8	NIF3L1	NIF3 NGG1 interacting factor 3-like 1 (S. pombe) [Source:HGNC Symbol;Acc:13390]
Q9GZU8	FAM192A	family with sequence similarity 192, member A [Source:HGNC Symbol;Acc:29856]
Q9GZZ1	NAA50	N(alpha)-acetyltransferase 50, NatE catalytic subunit [Source:HGNC Symbol;Acc:29533]
Q9H078	CLPB	ClpB caseinolytic peptidase B homolog (E. coli) [Source:HGNC Symbol;Acc:30664]
Q9H079	C15orf29	chromosome 15 open reading frame 29 [Source:HGNC Symbol;Acc:26199]
Q9H098	FAM107B	family with sequence similarity 107, member B [Source:HGNC Symbol;Acc:23726]
Q9H0A0	NAT10	N-acetyltransferase 10 (GCN5-related) [Source:HGNC Symbol;Acc:29830]
Q9H0C2	SLC25A31	solute carrier family 25 (mitochondrial carrier; adenine nucleotide translocator), member 31 [Source:HGNC Symbol;Acc:25319]
Q9H0C8	ILKAP	integrin-linked kinase-associated serine/threonine phosphatase [Source:HGNC Symbol;Acc:15566]
Q9H0D6	XRN2	5'-3' exoribonuclease 2 [Source:HGNC Symbol;Acc:12836]
Q9H0E9	BRD8	bromodomain containing 8 [Source:HGNC Symbol;Acc:19874]
Q9H0G5	NSRP1	nuclear speckle splicing regulatory protein 1 [Source:HGNC Symbol;Acc:25305]
Q9H1H9	KIF13A	kinesin family member 13A [Source:HGNC Symbol;Acc:14566]
Q9H211	CDT1	chromatin licensing and DNA replication factor 1 [Source:HGNC Symbol;Acc:24576]
Q9H223	EHD4	EH-domain containing 4 [Source:HGNC Symbol;Acc:3245]
Q9H2F5	EPC1	enhancer of polycomb homolog 1 (Drosophila) [Source:HGNC Symbol;Acc:19876]
Q9H2P0	ADNP	activity-dependent neuroprotector homeobox [Source:HGNC Symbol;Acc:15766]
Q9H2U1	DHX36	DEAH (Asp-Glu-Ala-His) box polypeptide 36 [Source:HGNC Symbol;Acc:14410]
Q9H2U2	PPA2	pyrophosphatase (inorganic) 2 [Source:HGNC Symbol;Acc:28883]
Q9H2W6	MRPL46	mitochondrial ribosomal protein L46 [Source:HGNC Symbol;Acc:1192]
Q9H3E2	SNX25	sorting nexin 25 [Source:HGNC Symbol;Acc:21883]
Q9H3K6	BOLA2B	bolA homolog 2B (E. coli) [Source:HGNC Symbol;Acc:32479]
Q9H3U1	UNC45A	unc-45 homolog A (C. elegans) [Source:HGNC Symbol;Acc:30594]
Q9H3Z4	DNAJC5	DnaJ (Hsp40) homolog, subfamily C, member 5 [Source:HGNC Symbol;Acc:16235]
Q9H444	CHMP4B	chromatin modifying protein 4B [Source:HGNC Symbol;Acc:16171]
Q9H4A4	RNPEP	arginyl aminopeptidase (aminopeptidase B) [Source:HGNC Symbol;Acc:10078]
Q9H4E7	DEF6	differentially expressed in FDCP 6 homolog (mouse) [Source:HGNC Symbol;Acc:2760]
Q9H501	ESF1	ESF1, nucleolar pre-rRNA processing protein, homolog (S. cerevisiae) [Source:HGNC Symbol;Acc:15898]
Q9H5Z6	FAM124B	family with sequence similarity 124B [Source:HGNC Symbol;Acc:26224]
Q9H694	BICC1	bicaudal C homolog 1 (Drosophila) [Source:HGNC Symbol;Acc:19351]
Q9H6P5	TASP1	taspase, threonine aspartase, 1 [Source:HGNC Symbol;Acc:15859]
Q9H6R3	ACSS3	acyl-CoA synthetase short-chain family member 3 [Source:HGNC Symbol;Acc:24723]
Q9H6T3	RPAP3	RNA polymerase II associated protein 3 [Source:HGNC Symbol;Acc:26151]
Q9H6Z4	RANBP3	RAN binding protein 3 [Source:HGNC Symbol;Acc:9850]
Q9H788	SH2D4A	SH2 domain containing 4A [Source:HGNC Symbol;Acc:26102]
Q9H7D0	DOCK5	dedicator of cytokinesis 5 [Source:HGNC Symbol;Acc:23476]
Q9H7Z3	C14orf102	chromosome 14 open reading frame 102 [Source:HGNC Symbol;Acc:20186]
Q9H7Z6	KAT8	K(lysine) acetyltransferase 8 [Source:HGNC Symbol;Acc:17933]
Q9H845	ACAD9	acyl-CoA dehydrogenase family, member 9 [Source:HGNC Symbol;Acc:21497]
Q9H8E8	CSRP2BP	CSRP2 binding protein [Source:HGNC Symbol;Acc:15904]
Q9H8H3	METTL7A	methyltransferase like 7A [Source:HGNC Symbol;Acc:24550]
Q9H8M2	BRD9	bromodomain containing 9 [Source:HGNC Symbol;Acc:25818]
Q9H8P0	SRD5A3	steroid 5 alpha-reductase 3 [Source:HGNC Symbol;Acc:25812]
Q9H8S9	MOBKL1B	MOB1, Mps One Binder kinase activator-like 1B (yeast) [Source:HGNC Symbol;Acc:16015]
Q9H8W4	PLEKHF2	pleckstrin homology domain containing, family F (with FYVE domain) member 2 [Source:HGNC Symbol;Acc:20757]
Q9H993	C6orf211	chromosome 6 open reading frame 211 [Source:HGNC Symbol;Acc:17872]
Q9H9A5	CNOT10	CCR4-NOT transcription complex, subunit 10 [Source:HGNC Symbol;Acc:23817]
Q9H9E3	COG4	component of oligomeric golgi complex 4 [Source:HGNC Symbol;Acc:18620]
Q9H9P8	L2HGDH	L-2-hydroxyglutarate dehydrogenase [Source:HGNC Symbol;Acc:20499]
Q9HA77	CARS2	cysteinyl-tRNA synthetase 2, mitochondrial (putative) [Source:HGNC Symbol;Acc:25695]
Q9HAF1	MEAF6	MYST/Esa1-associated factor 6 [Source:HGNC Symbol;Acc:25674]
Q9HAS0	C17orf75	chromosome 17 open reading frame 75 [Source:HGNC Symbol;Acc:30173]
Q9HAT1	LMAN1L	lectin, mannose-binding, 1 like [Source:HGNC Symbol;Acc:6632]
Q9HAT8	PELI2	pellino homolog 2 (Drosophila) [Source:HGNC Symbol;Acc:8828]
Q9HAV4	XPO5	exportin 5 [Source:HGNC Symbol;Acc:17675]
Q9HAV7	GRPEL1	GrpE-like 1, mitochondrial (E. coli) [Source:HGNC Symbol;Acc:19696]
Q9HB07	C12orf10	chromosome 12 open reading frame 10 [Source:HGNC Symbol;Acc:17590]
Q9HB55	CYP3A43	cytochrome P450, family 3, subfamily A, polypeptide 43 [Source:HGNC Symbol;Acc:17450]
Q9HB71	CACYBP	calcyclin binding protein [Source:HGNC Symbol;Acc:30423]
Q9HC10	OTOF	otoferlin [Source:HGNC Symbol;Acc:8515]
Q9HC38	GLOD4	glyoxalase domain containing 4 [Source:HGNC Symbol;Acc:14111]
Q9HCE1	MOV10	Mov10, Moloney leukemia virus 10, homolog (mouse) [Source:HGNC Symbol;Acc:7200]
Q9HCF4	RNF213	ring finger protein 213 [Source:HGNC Symbol;Acc:14539]
Q9HCG1	ZNF160	zinc finger protein 160 [Source:HGNC Symbol;Acc:12948]
Q9HCK8	CHD8	chromodomain helicase DNA binding protein 8 [Source:HGNC Symbol;Acc:20153]
Q9HCM2	PLXNA4	plexin A4 [Source:HGNC Symbol;Acc:9102]
Q9HCS4	TCF7L1	transcription factor 7-like 1 (T-cell specific, HMG-box) [Source:HGNC Symbol;Acc:11640]
Q9HCS7	XAB2	XPA binding protein 2 [Source:HGNC Symbol;Acc:14089]
Q9HD23	MRS2	MRS2 magnesium homeostasis factor homolog (S. cerevisiae) [Source:HGNC Symbol;Acc:13785]
Q9HD26	GOPC	golgi-associated PDZ and coiled-coil motif containing [Source:HGNC Symbol;Acc:17643]
Q9HD33	MRPL47	mitochondrial ribosomal protein L47 [Source:HGNC Symbol;Acc:16652]
Q9HD42	CHMP1A	chromatin modifying protein 1A [Source:HGNC Symbol;Acc:8740]
Q9NNW7	TXNRD2	thioredoxin reductase 2 [Source:HGNC Symbol;Acc:18155]
Q9NP61	ARFGAP3	ADP-ribosylation factor GTPase activating protein 3 [Source:HGNC Symbol;Acc:661]
Q9NP62	GCM1	glial cells missing homolog 1 (Drosophila) [Source:HGNC Symbol;Acc:4197]
Q9NP64	ZCCHC17	zinc finger, CCHC domain containing 17 [Source:HGNC Symbol;Acc:30246]
Q9NP72	RAB18	RAB18, member RAS oncogene family [Source:HGNC Symbol;Acc:14244]
Q9NP81	FBXO17	F-box protein 17 [Source:HGNC Symbol;Acc:18754]
Q9NPB8	GPCPD1	glycerophosphocholine phosphodiesterase GDE1 homolog (S. cerevisiae) [Source:HGNC Symbol;Acc:26957]
Q9NPF5	DMAP1	DNA methyltransferase 1 associated protein 1 [Source:HGNC Symbol;Acc:18291]
Q9NPG3	UBN1	ubinuclein 1 [Source:HGNC Symbol;Acc:12506]
Q9NQ66	PLCB1	phospholipase C, beta 1 (phosphoinositide-specific) [Source:HGNC Symbol;Acc:15917]
Q9NQ88	C12orf5	chromosome 12 open reading frame 5 [Source:HGNC Symbol;Acc:1185]
Q9NQ89	C12orf4	chromosome 12 open reading frame 4 [Source:HGNC Symbol;Acc:1184]
Q9NQC1	PHF15	PHD finger protein 15 [Source:HGNC Symbol;Acc:22984]
Q9NQC3	RTN4	reticulon 4 [Source:HGNC Symbol;Acc:14085]
Q9NQI0	DDX4	DEAD (Asp-Glu-Ala-Asp) box polypeptide 4 [Source:HGNC Symbol;Acc:18700]
Q9NQL9	DMRT3	doublesex and mab-3 related transcription factor 3 [Source:HGNC Symbol;Acc:13909]
Q9NQS7	INCENP	inner centromere protein antigens 135/155kDa [Source:HGNC Symbol;Acc:6058]
Q9NQW7	XPNPEP1	X-prolyl aminopeptidase (aminopeptidase P) 1, soluble [Source:HGNC Symbol;Acc:12822]
Q9NQW8	CNGB3	cyclic nucleotide gated channel beta 3 [Source:HGNC Symbol;Acc:2153]
Q9NQX4	MYO5C	myosin VC [Source:HGNC Symbol;Acc:7604]
Q9NR30	DDX21	DEAD (Asp-Glu-Ala-Asp) box polypeptide 21 [Source:HGNC Symbol;Acc:2744]
Q9NR34	MAN1C1	mannosidase, alpha, class 1C, member 1 [Source:HGNC Symbol;Acc:19080]
Q9NR45	NANS	N-acetylneuraminic acid synthase [Source:HGNC Symbol;Acc:19237]
Q9NRA8	EIF4ENIF1	eukaryotic translation initiation factor 4E nuclear import factor 1 [Source:HGNC Symbol;Acc:16687]
Q9NRG0	CHRAC1	chromatin accessibility complex 1 [Source:HGNC Symbol;Acc:13544]
Q9NRH2	SNRK	SNF related kinase [Source:HGNC Symbol;Acc:30598]
Q9NRK6	ABCB10	ATP-binding cassette, sub-family B (MDR/TAP), member 10 [Source:HGNC Symbol;Acc:41]
Q9NRL3	STRN4	striatin, calmodulin binding protein 4 [Source:HGNC Symbol;Acc:15721]
Q9NS87	KIF15	kinesin family member 15 [Source:HGNC Symbol;Acc:17273]
Q9NSD9	FARSB	phenylalanyl-tRNA synthetase, beta subunit [Source:HGNC Symbol;Acc:17800]
Q9NSE4	IARS2	isoleucyl-tRNA synthetase 2, mitochondrial [Source:HGNC Symbol;Acc:29685]
Q9NSG2	C1orf112	chromosome 1 open reading frame 112 [Source:HGNC Symbol;Acc:25565]
Q9NTI5	PDS5B	PDS5, regulator of cohesion maintenance, homolog B (S. cerevisiae) [Source:HGNC Symbol;Acc:20418]
Q9NTJ3	SMC4	structural maintenance of chromosomes 4 [Source:HGNC Symbol;Acc:14013]
Q9NTK5	OLA1	Obg-like ATPase 1 [Source:HGNC Symbol;Acc:28833]
Q9NTZ6	RBM12	RNA binding motif protein 12 [Source:HGNC Symbol;Acc:9898]
Q9NU22	MDN1	MDN1, midasin homolog (yeast) [Source:HGNC Symbol;Acc:18302]
Q9NUB1	ACSS1	acyl-CoA synthetase short-chain family member 1 [Source:HGNC Symbol;Acc:16091]
Q9NUI1	DECR2	2,4-dienoyl CoA reductase 2, peroxisomal [Source:HGNC Symbol;Acc:2754]
Q9NUV9	GIMAP4	GTPase, IMAP family member 4 [Source:HGNC Symbol;Acc:21872]
Q9NV06	DCAF13	DDB1 and CUL4 associated factor 13 [Source:HGNC Symbol;Acc:24535]
Q9NV66	TYW1	tRNA-yW synthesizing protein 1 homolog (S. cerevisiae) [Source:HGNC Symbol;Acc:25598]
Q9NVA2	2012-09-11	septin 11 [Source:HGNC Symbol;Acc:25589]
Q9NVH6	TMLHE	trimethyllysine hydroxylase, epsilon [Source:HGNC Symbol;Acc:18308]
Q9NVI7	ATAD3A	ATPase family, AAA domain containing 3A [Source:HGNC Symbol;Acc:25567]
Q9NVN8	GNL3L	guanine nucleotide binding protein-like 3 (nucleolar)-like [Source:HGNC Symbol;Acc:25553]
Q9NVP1	DDX18	DEAD (Asp-Glu-Ala-Asp) box polypeptide 18 [Source:HGNC Symbol;Acc:2741]
Q9NVR7	TBCCD1	TBCC domain containing 1 [Source:HGNC Symbol;Acc:25546]
Q9NVU0	POLR3E	polymerase (RNA) III (DNA directed) polypeptide E (80kD) [Source:HGNC Symbol;Acc:30347]
Q9NVV4	MTPAP	mitochondrial poly(A) polymerase [Source:HGNC Symbol;Acc:25532]
Q9NW13	RBM28	RNA binding motif protein 28 [Source:HGNC Symbol;Acc:21863]
Q9NW64	RBM22	RNA binding motif protein 22 [Source:HGNC Symbol;Acc:25503]
Q9NW82	WDR70	WD repeat domain 70 [Source:HGNC Symbol;Acc:25495]
Q9NWH9	SLTM	SAFB-like, transcription modulator [Source:HGNC Symbol;Acc:20709]
Q9NWR8	CCDC109B	coiled-coil domain containing 109B [Source:HGNC Symbol;Acc:26076]
Q9NWU1	OXSM	3-oxoacyl-ACP synthase, mitochondrial [Source:HGNC Symbol;Acc:26063]
Q9NWX6	THG1L	tRNA-histidine guanylyltransferase 1-like (S. cerevisiae) [Source:HGNC Symbol;Acc:26053]
Q9NWY4	C4orf27	chromosome 4 open reading frame 27 [Source:HGNC Symbol;Acc:26051]
Q9NWZ3	IRAK4	interleukin-1 receptor-associated kinase 4 [Source:HGNC Symbol;Acc:17967]
Q9NX40	OCIAD1	OCIA domain containing 1 [Source:HGNC Symbol;Acc:16074]
Q9NX46	ADPRHL2	ADP-ribosylhydrolase like 2 [Source:HGNC Symbol;Acc:21304]
Q9NX55	C15orf63	chromosome 15 open reading frame 63 [Source:HGNC Symbol;Acc:18418]
Q9NX63	CHCHD3	coiled-coil-helix-coiled-coil-helix domain containing 3 [Source:HGNC Symbol;Acc:21906]
Q9NXE4	SMPD4	sphingomyelin phosphodiesterase 4, neutral membrane (neutral sphingomyelinase-3) [Source:HGNC Symbol;Acc:32949]
Q9NXF1	TEX10	testis expressed 10 [Source:HGNC Symbol;Acc:25988]
Q9NXF7	DCAF16	DDB1 and CUL4 associated factor 16 [Source:HGNC Symbol;Acc:25987]
Q9NXR7	BRE	brain and reproductive organ-expressed (TNFRSF1A modulator) [Source:HGNC Symbol;Acc:1106]
Q9NXR8	ING3	inhibitor of growth family, member 3 [Source:HGNC Symbol;Acc:14587]
Q9NY27	PPP4R2	protein phosphatase 4, regulatory subunit 2 [Source:HGNC Symbol;Acc:18296]
Q9NYF8	BCLAF1	BCL2-associated transcription factor 1 [Source:HGNC Symbol;Acc:16863]
Q9NYG2	ZDHHC3	zinc finger, DHHC-type containing 3 [Source:HGNC Symbol;Acc:18470]
Q9NYK5	MRPL39	mitochondrial ribosomal protein L39 [Source:HGNC Symbol;Acc:14027]
Q9NYV4	CDK12	cyclin-dependent kinase 12 [Source:HGNC Symbol;Acc:24224]
Q9NZ01	TECR	trans-2,3-enoyl-CoA reductase [Source:HGNC Symbol;Acc:4551]
Q9NZB8	MOCS1	molybdenum cofactor synthesis 1 [Source:HGNC Symbol;Acc:7190]
Q9NZC4	EHF	ets homologous factor [Source:HGNC Symbol;Acc:3246]
Q9NZJ4	SACS	spastic ataxia of Charlevoix-Saguenay (sacsin) [Source:HGNC Symbol;Acc:10519]
Q9NZM1	MYOF	myoferlin [Source:HGNC Symbol;Acc:3656]
Q9NZM4	GLTSCR1	glioma tumor suppressor candidate region gene 1 [Source:HGNC Symbol;Acc:4332]
Q9NZN5	ARHGEF12	Rho guanine nucleotide exchange factor (GEF) 12 [Source:HGNC Symbol;Acc:14193]
Q9NZP6	C15orf2	chromosome 15 open reading frame 2 [Source:HGNC Symbol;Acc:1190]
Q9NZU1	FLRT1	fibronectin leucine rich transmembrane protein 1 [Source:HGNC Symbol;Acc:3760]
Q9P016	THYN1	thymocyte nuclear protein 1 [Source:HGNC Symbol;Acc:29560]
Q9P032	NDUFAF4	NADH dehydrogenase (ubiquinone) 1 alpha subcomplex, assembly factor 4 [Source:HGNC Symbol;Acc:21034]
Q9P0M6	H2AFY2	H2A histone family, member Y2 [Source:HGNC Symbol;Acc:14453]
Q9P0U4	CXXC1	CXXC finger protein 1 [Source:HGNC Symbol;Acc:24343]
Q9P104	DOK5	docking protein 5 [Source:HGNC Symbol;Acc:16173]
Q9P212	PLCE1	phospholipase C, epsilon 1 [Source:HGNC Symbol;Acc:17175]
Q9P219	CCDC88C	coiled-coil domain containing 88C [Source:HGNC Symbol;Acc:19967]
Q9P225	DNAH2	dynein, axonemal, heavy chain 2 [Source:HGNC Symbol;Acc:2948]
Q9P253	VPS18	vacuolar protein sorting 18 homolog (S. cerevisiae) [Source:HGNC Symbol;Acc:15972]
Q9P258	RCC2	regulator of chromosome condensation 2 [Source:HGNC Symbol;Acc:30297]
Q9P278	FNIP2	folliculin interacting protein 2 [Source:HGNC Symbol;Acc:29280]
Q9P281
Q9P2F9	ZNF319	zinc finger protein 319 [Source:HGNC Symbol;Acc:13644]
Q9P2K8	EIF2AK4	eukaryotic translation initiation factor 2 alpha kinase 4 [Source:HGNC Symbol;Acc:19687]
Q9P2M7	CGN	cingulin [Source:HGNC Symbol;Acc:17429]
Q9P2R7	SUCLA2	succinate-CoA ligase, ADP-forming, beta subunit [Source:HGNC Symbol;Acc:11448]
Q9UBC0	ONECUT1	one cut homeobox 1 [Source:HGNC Symbol;Acc:8138]
Q9UBK7	RABL2A	RAB, member of RAS oncogene family-like 2A [Source:HGNC Symbol;Acc:9799]
Q9UBQ0	VPS29	vacuolar protein sorting 29 homolog (S. cerevisiae) [Source:HGNC Symbol;Acc:14340]
Q9UBT2	UBA2	ubiquitin-like modifier activating enzyme 2 [Source:HGNC Symbol;Acc:30661]
Q9UBU8	MORF4L1	mortality factor 4 like 1 [Source:HGNC Symbol;Acc:16989]
Q9UDR5	AASS	aminoadipate-semialdehyde synthase [Source:HGNC Symbol;Acc:17366]
Q9UER7	DAXX	death-domain associated protein [Source:HGNC Symbol;Acc:2681]
Q9UEW8	STK39	serine threonine kinase 39 [Source:HGNC Symbol;Acc:17717]
Q9UFN0	NIPSNAP3A	nipsnap homolog 3A (C. elegans) [Source:HGNC Symbol;Acc:23619]
Q9UFW8	CGGBP1	CGG triplet repeat binding protein 1 [Source:HGNC Symbol;Acc:1888]
Q9UGJ0	PRKAG2	protein kinase, AMP-activated, gamma 2 non-catalytic subunit [Source:HGNC Symbol;Acc:9386]
Q9UHB7	AFF4	AF4/FMR2 family, member 4 [Source:HGNC Symbol;Acc:17869]
Q9UHB9	SRP68	signal recognition particle 68kDa [Source:HGNC Symbol;Acc:11302]
Q9UHD2	TBK1	TANK-binding kinase 1 [Source:HGNC Symbol;Acc:11584]
Q9UHD8	2012-09-09	septin 9 [Source:HGNC Symbol;Acc:7323]
Q9UHN1	POLG2	polymerase (DNA directed), gamma 2, accessory subunit [Source:HGNC Symbol;Acc:9180]
Q9UHX1	PUF60	poly-U binding splicing factor 60KDa [Source:HGNC Symbol;Acc:17042]
Q9UHY1	NRBP1	nuclear receptor binding protein 1 [Source:HGNC Symbol;Acc:7993]
Q9UI17	DMGDH	dimethylglycine dehydrogenase [Source:HGNC Symbol;Acc:24475]
Q9UIC8	LCMT1	leucine carboxyl methyltransferase 1 [Source:HGNC Symbol;Acc:17557]
Q9UIF8	BAZ2B	bromodomain adjacent to zinc finger domain, 2B [Source:HGNC Symbol;Acc:963]
Q9UIF9	BAZ2A	bromodomain adjacent to zinc finger domain, 2A [Source:HGNC Symbol;Acc:962]
Q9UIG0	BAZ1B	bromodomain adjacent to zinc finger domain, 1B [Source:HGNC Symbol;Acc:961]
Q9UII2	ATPIF1	ATPase inhibitory factor 1 [Source:HGNC Symbol;Acc:871]
Q9UIJ7	AK3	adenylate kinase 3 [Source:HGNC Symbol;Acc:17376]
Q9UIS9	MBD1	methyl-CpG binding domain protein 1 [Source:HGNC Symbol;Acc:6916]
Q9UJ41	KCTD7	potassium channel tetramerisation domain containing 7 [Source:HGNC Symbol;Acc:21957]
Q9UJM8	HAO1	hydroxyacid oxidase (glycolate oxidase) 1 [Source:HGNC Symbol;Acc:4809]
Q9UJS0	SLC25A13	solute carrier family 25, member 13 (citrin) [Source:HGNC Symbol;Acc:10983]
Q9UJU2	LEF1	lymphoid enhancer-binding factor 1 [Source:HGNC Symbol;Acc:6551]
Q9UJU6	DBNL	drebrin-like [Source:HGNC Symbol;Acc:2696]
Q9UJX3	ANAPC7	anaphase promoting complex subunit 7 [Source:HGNC Symbol;Acc:17380]
Q9UJZ1	STOML2	stomatin (EPB72)-like 2 [Source:HGNC Symbol;Acc:14559]
Q9UK32	RPS6KA6	ribosomal protein S6 kinase, 90kDa, polypeptide 6 [Source:HGNC Symbol;Acc:10435]
Q9UK59	DBR1	debranching enzyme homolog 1 (S. cerevisiae) [Source:HGNC Symbol;Acc:15594]
Q9UKJ3	GPATCH8	G patch domain containing 8 [Source:HGNC Symbol;Acc:29066]
Q9UKM9	RALY	RNA binding protein, autoantigenic (hnRNP-associated with lethal yellow homolog (mouse)) [Source:HGNC Symbol;Acc:15921]
Q9UKS7	IKZF2	IKAROS family zinc finger 2 (Helios) [Source:HGNC Symbol;Acc:13177]
Q9UKT8	FBXW2	F-box and WD repeat domain containing 2 [Source:HGNC Symbol;Acc:13608]
Q9UKV3	ACIN1	apoptotic chromatin condensation inducer 1 [Source:HGNC Symbol;Acc:17066]
Q9UKX7	NUP50	nucleoporin 50kDa [Source:HGNC Symbol;Acc:8065]
Q9UKY7	CDV3	CDV3 homolog (mouse) [Source:HGNC Symbol;Acc:26928]
Q9UL18	EIF2C1	eukaryotic translation initiation factor 2C, 1 [Source:HGNC Symbol;Acc:3262]
Q9UL25	RAB21	RAB21, member RAS oncogene family [Source:HGNC Symbol;Acc:18263]
Q9ULA0	DNPEP	aspartyl aminopeptidase [Source:HGNC Symbol;Acc:2981]
Q9ULC4	MCTS1	malignant T cell amplified sequence 1 [Source:HGNC Symbol;Acc:23357]
Q9ULD4	BRPF3	bromodomain and PHD finger containing, 3 [Source:HGNC Symbol;Acc:14256]
Q9ULG1	INO80	INO80 homolog (S. cerevisiae) [Source:HGNC Symbol;Acc:26956]
Q9ULH7	MKL2	MKL/myocardin-like 2 [Source:HGNC Symbol;Acc:29819]
Q9ULL1	PLEKHG1	pleckstrin homology domain containing, family G (with RhoGef domain) member 1 [Source:HGNC Symbol;Acc:20884]
Q9ULL5	PRR12	proline rich 12 [Source:HGNC Symbol;Acc:29217]
Q9ULP9	TBC1D24	TBC1 domain family, member 24 [Source:HGNC Symbol;Acc:29203]
Q9ULR0	ISY1	ISY1 splicing factor homolog (S. cerevisiae) [Source:HGNC Symbol;Acc:29201]
Q9ULU4	ZMYND8	zinc finger, MYND-type containing 8 [Source:HGNC Symbol;Acc:9397]
Q9ULV4	CORO1C	coronin, actin binding protein, 1C [Source:HGNC Symbol;Acc:2254]
Q9ULX3	NOB1	NIN1/RPN12 binding protein 1 homolog (S. cerevisiae) [Source:HGNC Symbol;Acc:29540]
Q9ULX6	AKAP8L	A kinase (PRKA) anchor protein 8-like [Source:HGNC Symbol;Acc:29857]
Q9ULZ3	PYCARD	PYD and CARD domain containing [Source:HGNC Symbol;Acc:16608]
Q9UM13	ANAPC10	anaphase promoting complex subunit 10 [Source:HGNC Symbol;Acc:24077]
Q9UMN6	AD000671.1	Histone-lysine N-methyltransferase MLL4 [Source:UniProtKB/Swiss-Prot;Acc:Q9UMN6]
Q9UMR2	DDX19B	DEAD (Asp-Glu-Ala-As) box polypeptide 19B [Source:HGNC Symbol;Acc:2742]
Q9UMS4	PRPF19	PRP19/PSO4 pre-mRNA processing factor 19 homolog (S. cerevisiae) [Source:HGNC Symbol;Acc:17896]
Q9UMX1	SUFU	suppressor of fused homolog (Drosophila) [Source:HGNC Symbol;Acc:16466]
Q9UMX5	NENF	neudesin neurotrophic factor [Source:HGNC Symbol;Acc:30384]
Q9UN37	VPS4A	vacuolar protein sorting 4 homolog A (S. cerevisiae) [Source:HGNC Symbol;Acc:13488]
Q9UNF0	PACSIN2	protein kinase C and casein kinase substrate in neurons 2 [Source:HGNC Symbol;Acc:8571]
Q9UNL2	SSR3	signal sequence receptor, gamma (translocon-associated protein gamma) [Source:HGNC Symbol;Acc:11325]
Q9UNL4	ING4	inhibitor of growth family, member 4 [Source:HGNC Symbol;Acc:19423]
Q9UNS1	TIMELESS	timeless homolog (Drosophila) [Source:HGNC Symbol;Acc:11813]
Q9UNX3	RPL26L1	ribosomal protein L26-like 1 [Source:HGNC Symbol;Acc:17050]
Q9UPA5	BSN	bassoon (presynaptic cytomatrix protein) [Source:HGNC Symbol;Acc:1117]
Q9UPG8	PLAGL2	pleiomorphic adenoma gene-like 2 [Source:HGNC Symbol;Acc:9047]
Q9UPN3	MACF1	microtubule-actin crosslinking factor 1 [Source:HGNC Symbol;Acc:13664]
Q9UPN9	TRIM33	tripartite motif containing 33 [Source:HGNC Symbol;Acc:16290]
Q9UPT9	USP22	ubiquitin specific peptidase 22 [Source:HGNC Symbol;Acc:12621]
Q9UPX6	KIAA1024	KIAA1024 [Source:HGNC Symbol;Acc:29172]
Q9UQ35	SRRM2	serine/arginine repetitive matrix 2 [Source:HGNC Symbol;Acc:16639]
Q9UQ84	EXO1	exonuclease 1 [Source:HGNC Symbol;Acc:3511]
Q9UQB9	AURKC	aurora kinase C [Source:HGNC Symbol;Acc:11391]
Q9UQE7	SMC3	structural maintenance of chromosomes 3 [Source:HGNC Symbol;Acc:2468]
Q9UQL6	HDAC5	histone deacetylase 5 [Source:HGNC Symbol;Acc:14068]
Q9UQR1	ZNF148	zinc finger protein 148 [Source:HGNC Symbol;Acc:12933]
Q9Y224	C14orf166	chromosome 14 open reading frame 166 [Source:HGNC Symbol;Acc:23169]
Q9Y237	PIN4	protein (peptidylprolyl cis/trans isomerase) NIMA-interacting, 4 (parvulin) [Source:HGNC Symbol;Acc:8992]
Q9Y251	HPSE	heparanase [Source:HGNC Symbol;Acc:5164]
Q9Y262	EIF3L	eukaryotic translation initiation factor 3, subunit L [Source:HGNC Symbol;Acc:18138]
Q9Y263	PLAA	phospholipase A2-activating protein [Source:HGNC Symbol;Acc:9043]
Q9Y266	NUDC	nuclear distribution gene C homolog (A. nidulans) [Source:HGNC Symbol;Acc:8045]
Q9Y277	VDAC3	voltage-dependent anion channel 3 [Source:HGNC Symbol;Acc:12674]
Q9Y285	FARSA	phenylalanyl-tRNA synthetase, alpha subunit [Source:HGNC Symbol;Acc:3592]
Q9Y291	MRPS33	mitochondrial ribosomal protein S33 [Source:HGNC Symbol;Acc:16634]
Q9Y2F5	KIAA0947	KIAA0947 [Source:HGNC Symbol;Acc:29154]
Q9Y2G0	EFR3B	EFR3 homolog B (S. cerevisiae) [Source:HGNC Symbol;Acc:29155]
Q9Y2G1	C11orf9	chromosome 11 open reading frame 9 [Source:HGNC Symbol;Acc:1181]
Q9Y2H0	DLGAP4	discs, large (Drosophila) homolog-associated protein 4 [Source:HGNC Symbol;Acc:24476]
Q9Y2L1	DIS3	DIS3 mitotic control homolog (S. cerevisiae) [Source:HGNC Symbol;Acc:20604]
Q9Y2L6	FRMD4B	FERM domain containing 4B [Source:HGNC Symbol;Acc:24886]
Q9Y2P5	SLC27A5	solute carrier family 27 (fatty acid transporter), member 5 [Source:HGNC Symbol;Acc:10999]
Q9Y2Q3	GSTK1	glutathione S-transferase kappa 1 [Source:HGNC Symbol;Acc:16906]
Q9Y2R4	DDX52	DEAD (Asp-Glu-Ala-Asp) box polypeptide 52 [Source:HGNC Symbol;Acc:20038]
Q9Y2R9	MRPS7	mitochondrial ribosomal protein S7 [Source:HGNC Symbol;Acc:14499]
Q9Y2W1	THRAP3	thyroid hormone receptor associated protein 3 [Source:HGNC Symbol;Acc:22964]
[truncated: 52 more rows]

## Sheet: GO cellular component analysis
Go cellular component analysis
NGR = Number of annotated genes in the reference list;
TNGR = Total number of genes in the reference list;
NG = Number of annotated genes in the input list;
TNG = Total number of genes in the input list;
Hyp = Hypergeometric pValue; Hyp* = Corrected hypergeometric pValue by Benjamini and Hochberg False Discovery Rate (FDR) correction
Genes	NGR	TNGR	NG	TNG	Hyp	Hyp*	Annotations
976 genes	5302	34208	976	2031	1.87143e-282	1.24263e-279	GO:0005737: cytoplasm (CC)
985 genes	5441	34208	985	2031	1.81131e-279	6.01355e-277	GO:0005634: nucleus (CC)
527 genes	2146	34208	527	2031	6.33779e-193	1.40276e-190	GO:0005829: cytosol (CC)
401 genes	1461	34208	401	2031	1.01385e-161	1.683e-159	GO:0005730: nucleolus (CC)
286 genes	891	34208	286	2031	9.3972e-133	1.24795e-130	GO:0005654: nucleoplasm (CC)
345 genes	1394	34208	345	2031	5.70514e-123	6.31369e-121	GO:0005739: mitochondrion (CC)
101 genes	201	34208	101	2031	7.02104e-69	6.65996e-67	GO:0005759: mitochondrial matrix (CC)
57 genes	132	34208	57	2031	8.13828e-35	6.75477e-33	GO:0030529: ribonucleoprotein complex (CC)
151 genes	846	34208	151	2031	1.55526e-34	1.14744e-32	GO:0005856: cytoskeleton (CC)
97 genes	390	34208	97	2031	2.436e-34	1.6175e-32	GO:0005625: soluble fraction (CC)
253 genes	1962	34208	253	2031	1.55218e-32	9.36951e-31	GO:0005622: intracellular (CC)
75 genes	265	34208	75	2031	8.78959e-31	4.86357e-29	GO:0005694: chromosome (CC)
80 genes	308	34208	80	2031	6.39925e-30	3.26854e-28	GO:0005743: mitochondrial inner membrane (CC)
52 genes	134	34208	52	2031	3.87438e-29	1.83756e-27	GO:0016607: nuclear speck (CC)
58 genes	174	34208	58	2031	3.09454e-28	1.36985e-26	GO:0005840: ribosome (CC)
39 genes	79	34208	39	2031	5.416e-27	2.24764e-25	GO:0071013: catalytic step 2 spliceosome (CC)
27 genes	52	34208	27	2031	7.30051e-20	2.85149e-18	GO:0022625: cytosolic large ribosomal subunit (CC)
54 genes	217	34208	54	2031	1.02519e-19	3.78183e-18	GO:0043234: protein complex (CC)
29 genes	64	34208	29	2031	4.06548e-19	1.42078e-17	GO:0000786: nucleosome (CC)
21 genes	36	34208	21	2031	3.73709e-17	1.24071e-15	GO:0022627: cytosolic small ribosomal subunit (CC)
29 genes	75	34208	29	2031	7.87078e-17	2.48866e-15	GO:0005681: spliceosomal complex (CC)
45 genes	180	34208	45	2031	9.41682e-17	2.84217e-15	GO:0015629: actin cytoskeleton (CC)
28 genes	74	34208	28	2031	5.20528e-16	1.50274e-14	GO:0016363: nuclear matrix (CC)
54 genes	269	34208	54	2031	2.39292e-15	6.6204e-14	GO:0043231: intracellular membrane-bounded organelle (CC)
70 genes	417	34208	70	2031	3.26866e-15	8.68157e-14	GO:0048471: perinuclear region of cytoplasm (CC)
32 genes	105	34208	32	2031	5.87221e-15	1.49967e-13	GO:0005777: peroxisome (CC)
19 genes	35	34208	19	2031	7.45927e-15	1.76891e-13	GO:0042645: mitochondrial nucleoid (CC)
27 genes	75	34208	27	2031	7.37758e-15	1.81434e-13	GO:0000785: chromatin (CC)
14 genes	22	34208	14	2031	1.31845e-12	3.0188e-11	GO:0000793: condensed chromosome (CC)
24 genes	72	34208	24	2031	1.59745e-12	3.53569e-11	GO:0001726: ruffle (CC)
48 genes	262	34208	48	2031	2.8393e-12	6.0816e-11	GO:0005874: microtubule (CC)
23 genes	68	34208	23	2031	3.27552e-12	6.79671e-11	GO:0000790: nuclear chromatin (CC)
26 genes	89	34208	26	2031	5.9517e-12	1.19755e-10	GO:0042470: melanosome (CC)
29 genes	113	34208	29	2031	1.29195e-11	2.52311e-10	GO:0005819: spindle (CC)
21 genes	60	34208	21	2031	1.34517e-11	2.55197e-10	GO:0000502: proteasome complex (CC)
12 genes	18	34208	12	2031	2.46857e-11	4.55314e-10	GO:0030530: heterogeneous nuclear ribonucleoprotein complex (CC)
52 genes	323	34208	52	2031	5.66478e-11	1.0166e-09	GO:0005813: centrosome (CC)
13 genes	23	34208	13	2031	7.15897e-11	1.25094e-09	GO:0015935: small ribosomal subunit (CC)
14 genes	30	34208	14	2031	3.8166e-10	6.498e-09	GO:0005782: peroxisomal matrix (CC)
26 genes	106	34208	26	2031	4.28163e-10	7.10751e-09	GO:0005938: cell cortex (CC)
10 genes	15	34208	10	2031	1.21482e-09	1.96741e-08	GO:0005852: eukaryotic translation initiation factor 3 complex (CC)
7 genes	7	34208	7	2031	2.57541e-09	4.07161e-08	GO:0005832: chaperonin-containing T-complex (CC)
16 genes	45	34208	16	2031	2.79918e-09	4.22422e-08	GO:0001725: stress fiber (CC)
25 genes	107	34208	25	2031	2.73993e-09	4.23096e-08	GO:0005635: nuclear envelope (CC)
10 genes	16	34208	10	2031	3.06586e-09	4.42551e-08	GO:0005753: mitochondrial proton-transporting ATP synthase complex (CC)
13 genes	29	34208	13	2031	3.03191e-09	4.47375e-08	GO:0008180: signalosome (CC)
22 genes	86	34208	22	2031	3.97483e-09	5.6155e-08	GO:0005815: microtubule organizing center (CC)
9 genes	14	34208	9	2031	1.37357e-08	1.9001e-07	GO:0035267: NuA4 histone acetyltransferase complex (CC)
23 genes	101	34208	23	2031	1.96518e-08	2.66303e-07	GO:0030027: lamellipodium (CC)
19 genes	73	34208	19	2031	3.32083e-08	4.41007e-07	GO:0030496: midbody (CC)
18 genes	66	34208	18	2031	3.44485e-08	4.48506e-07	GO:0016605: PML body (CC)
22 genes	97	34208	22	2031	4.29201e-08	5.48057e-07	GO:0015630: microtubule cytoskeleton (CC)
35 genes	219	34208	35	2031	8.91689e-08	1.11713e-06	GO:0005667: transcription factor complex (CC)
16 genes	58	34208	16	2031	1.65727e-07	2.03783e-06	GO:0005643: nuclear pore (CC)
19 genes	81	34208	19	2031	2.00173e-07	2.41664e-06	GO:0043005: neuron projection (CC)
12 genes	33	34208	12	2031	2.04327e-07	2.42273e-06	GO:0005884: actin filament (CC)
97 genes	958	34208	97	2031	2.12871e-07	2.47976e-06	GO:0005794: Golgi apparatus (CC)
25 genes	133	34208	25	2031	2.66547e-07	2.99978e-06	GO:0031965: nuclear membrane (CC)
11 genes	28	34208	11	2031	2.63363e-07	3.01506e-06	GO:0071339: MLL1 complex (CC)
13 genes	40	34208	13	2031	2.90351e-07	3.10956e-06	GO:0017053: transcriptional repressor complex (CC)
6 genes	7	34208	6	2031	2.89036e-07	3.14623e-06	GO:0000123: histone acetyltransferase complex (CC)
6 genes	7	34208	6	2031	2.89036e-07	3.14623e-06	GO:0005885: Arp2/3 protein complex (CC)
21 genes	102	34208	21	2031	4.91889e-07	5.18436e-06	GO:0005741: mitochondrial outer membrane (CC)
8 genes	15	34208	8	2031	6.72527e-07	6.87012e-06	GO:0016581: NuRD complex (CC)
8 genes	15	34208	8	2031	6.72527e-07	6.87012e-06	GO:0016585: chromatin remodeling complex (CC)
22 genes	116	34208	22	2031	1.16297e-06	1.17001e-05	GO:0005925: focal adhesion (CC)
9 genes	21	34208	9	2031	1.37773e-06	1.36539e-05	GO:0005839: proteasome core complex (CC)
13 genes	47	34208	13	2031	2.29631e-06	2.20978e-05	GO:0015030: Cajal body (CC)
8 genes	17	34208	8	2031	2.28181e-06	2.22812e-05	GO:0035097: histone methyltransferase complex (CC)
14 genes	55	34208	14	2031	2.80316e-06	2.659e-05	GO:0000776: kinetochore (CC)
6 genes	9	34208	6	2031	3.12588e-06	2.92336e-05	GO:0042555: MCM complex (CC)
9 genes	23	34208	9	2031	3.43633e-06	3.16906e-05	GO:0030863: cortical cytoskeleton (CC)
10 genes	29	34208	10	2031	3.75618e-06	3.41658e-05	GO:0000118: histone deacetylase complex (CC)
37 genes	279	34208	37	2031	4.20666e-06	3.67529e-05	GO:0005792: microsome (CC)
5 genes	6	34208	5	2031	4.18856e-06	3.70827e-05	GO:0005663: DNA replication factor C complex (CC)
5 genes	6	34208	5	2031	4.18856e-06	3.70827e-05	GO:0042382: paraspeckles (CC)
95 genes	1000	34208	95	2031	4.44745e-06	3.8352e-05	GO:0005783: endoplasmic reticulum (CC)
8 genes	19	34208	8	2031	6.37261e-06	5.42488e-05	GO:0005844: polysome (CC)
12 genes	44	34208	12	2031	6.59462e-06	5.54282e-05	GO:0005626: insoluble fraction (CC)
6 genes	10	34208	6	2031	7.41942e-06	6.15812e-05	GO:0016580: Sin3 complex (CC)
9 genes	25	34208	9	2031	7.7081e-06	6.31874e-05	GO:0000781: chromosome, telomeric region (CC)
9 genes	26	34208	9	2031	1.11674e-05	9.04284e-05	GO:0016604: nuclear body (CC)
26 genes	173	34208	26	2031	1.20439e-05	9.63516e-05	GO:0030424: axon (CC)
5 genes	7	34208	5	2031	1.39374e-05	0.000110172	GO:0070776: MOZ/MORF histone acetyltransferase complex (CC)
15 genes	75	34208	15	2031	2.94653e-05	0.000230176	GO:0000922: spindle pole (CC)
20 genes	122	34208	20	2031	3.33241e-05	0.000257293	GO:0005769: early endosome (CC)
5 genes	8	34208	5	2031	3.53371e-05	0.000266634	GO:0044428: nuclear part (CC)
5 genes	8	34208	5	2031	3.53371e-05	0.000266634	GO:0019773: proteasome core complex, alpha-subunit complex (CC)
9 genes	30	34208	9	2031	4.11893e-05	0.0003073	GO:0005913: cell-cell adherens junction (CC)
10 genes	37	34208	10	2031	4.22058e-05	0.000311385	GO:0032154: cleavage furrow (CC)
18 genes	105	34208	18	2031	4.41387e-05	0.000322067	GO:0016023: cytoplasmic membrane-bounded vesicle (CC)
4 genes	5	34208	4	2031	5.90198e-05	0.000421389	GO:0005853: eukaryotic translation elongation factor 1 complex (CC)
4 genes	5	34208	4	2031	5.90198e-05	0.000421389	GO:0001740: Barr body (CC)
14 genes	72	34208	14	2031	7.44781e-05	0.000526101	GO:0030426: growth cone (CC)
5 genes	9	34208	5	2031	7.56011e-05	0.000528412	GO:0008091: spectrin (CC)
28 genes	217	34208	28	2031	9.54292e-05	0.000660052	GO:0043025: neuronal cell body (CC)
6 genes	15	34208	6	2031	0.000136533	0.000925084	GO:0016514: SWI/SNF complex (CC)
10 genes	42	34208	10	2031	0.000135836	0.000929844	GO:0005758: mitochondrial intermembrane space (CC)
4 genes	6	34208	4	2031	0.000168682	0.00109809	GO:0070062: extracellular vesicular exosome (CC)
4 genes	6	34208	4	2031	0.000168682	0.00109809	GO:0071778: WINAC complex (CC)
4 genes	6	34208	4	2031	0.000168682	0.00109809	GO:0016589: NURF complex (CC)
4 genes	6	34208	4	2031	0.000168682	0.00109809	GO:0000276: mitochondrial proton-transporting ATP synthase complex, coupling factor F(o) (CC)
24 genes	182	34208	24	2031	0.000209075	0.00129744	GO:0030425: dendrite (CC)
12 genes	61	34208	12	2031	0.000213165	0.00129855	GO:0000777: condensed chromosome kinetochore (CC)
8 genes	29	34208	8	2031	0.000212166	0.00130443	GO:0005875: microtubule associated complex (CC)
3 genes	3	34208	3	2031	0.000208998	0.0013092	GO:0005945: 6-phosphofructokinase complex (CC)
3 genes	3	34208	3	2031	0.000208998	0.0013092	GO:0032777: Piccolo NuA4 histone acetyltransferase complex (CC)
3 genes	3	34208	3	2031	0.000208998	0.0013092	GO:0005924: cell-substrate adherens junction (CC)
6 genes	16	34208	6	2031	0.00020748	0.00133754	GO:0000792: heterochromatin (CC)
5 genes	11	34208	5	2031	0.000250687	0.0014996	GO:0005719: nuclear euchromatin (CC)
5 genes	11	34208	5	2031	0.000250687	0.0014996	GO:0005916: fascia adherens (CC)
17 genes	111	34208	17	2031	0.000293154	0.00173798	GO:0019717: synaptosome (CC)
20 genes	145	34208	20	2031	0.000377329	0.00221723	GO:0010008: endosome membrane (CC)
5 genes	12	34208	5	2031	0.000408726	0.00238065	GO:0051233: spindle midzone (CC)
10 genes	48	34208	10	2031	0.000436151	0.00249659	GO:0032587: ruffle membrane (CC)
6 genes	18	34208	6	2031	0.000433954	0.00250561	GO:0030864: cortical actin cytoskeleton (CC)
11 genes	58	34208	11	2031	0.000537975	0.00305312	GO:0000151: ubiquitin ligase complex (CC)
6 genes	19	34208	6	2031	0.000602498	0.00339033	GO:0000159: protein phosphatase type 2A complex (CC)
11 genes	59	34208	11	2031	0.000626219	0.0034942	GO:0030018: Z disc (CC)
4 genes	8	34208	4	2031	0.00071468	0.00395456	GO:0000346: transcription export complex (CC)
3 genes	4	34208	3	2031	0.000798819	0.00431233	GO:0005947: mitochondrial alpha-ketoglutarate dehydrogenase complex (CC)
3 genes	4	34208	3	2031	0.000798819	0.00431233	GO:0005862: muscle thin filament tropomyosin (CC)
3 genes	4	34208	3	2031	0.000798819	0.00431233	GO:0031428: box C/D snoRNP complex (CC)
9 genes	43	34208	9	2031	0.000807162	0.00432222	GO:0030175: filopodium (CC)
46 genes	475	34208	46	2031	0.000813906	0.00432347	GO:0030054: cell junction (CC)
5 genes	14	34208	5	2031	0.000934785	0.00488738	GO:0000178: exosome (RNase complex) (CC)
5 genes	14	34208	5	2031	0.000934785	0.00488738	GO:0031528: microvillus membrane (CC)
9 genes	44	34208	9	2031	0.000961876	0.00498973	GO:0005778: peroxisomal membrane (CC)
7 genes	28	34208	7	2031	0.00100865	0.00519181	GO:0000794: condensed nuclear chromosome (CC)
4 genes	9	34208	4	2031	0.00122594	0.00626174	GO:0048188: Set1C/COMPASS complex (CC)
5 genes	15	34208	5	2031	0.00133391	0.0067612	GO:0005720: nuclear heterochromatin (CC)
6 genes	22	34208	6	2031	0.00142091	0.00714759	GO:0005761: mitochondrial ribosome (CC)
7 genes	30	34208	7	2031	0.00156269	0.00780171	GO:0005876: spindle microtubule (CC)
4 genes	10	34208	4	2031	0.00194738	0.00867828	GO:0005657: replication fork (CC)
4 genes	10	34208	4	2031	0.00194738	0.00867828	GO:0016272: prefoldin complex (CC)
4 genes	10	34208	4	2031	0.00194738	0.00867828	GO:0031527: filopodium membrane (CC)
4 genes	10	34208	4	2031	0.00194738	0.00867828	GO:0032993: protein-DNA complex (CC)
4 genes	10	34208	4	2031	0.00194738	0.00867828	GO:0008385: IkappaB kinase complex (CC)
3 genes	5	34208	3	2031	0.00190852	0.00880039	GO:0000347: THO complex (CC)
3 genes	5	34208	3	2031	0.00190852	0.00880039	GO:0070852: cell body fiber (CC)
3 genes	5	34208	3	2031	0.00190852	0.00880039	GO:0000445: THO complex part of transcription export complex (CC)
3 genes	5	34208	3	2031	0.00190852	0.00880039	GO:0000275: mitochondrial proton-transporting ATP synthase complex, catalytic core F(1) (CC)
3 genes	5	34208	3	2031	0.00190852	0.00880039	GO:0005652: nuclear lamina (CC)
3 genes	5	34208	3	2031	0.00190852	0.00880039	GO:0034399: nuclear periphery (CC)
3 genes	5	34208	3	2031	0.00190852	0.00880039	GO:0005638: lamin filament (CC)
3 genes	5	34208	3	2031	0.00190852	0.00880039	GO:0070937: CRD-mediated mRNA stability complex (CC)
3 genes	5	34208	3	2031	0.00190852	0.00880039	GO:0000796: condensin complex (CC)
3 genes	5	34208	3	2031	0.00190852	0.00880039	GO:0030870: Mre11 complex (CC)
3 genes	5	34208	3	2031	0.00190852	0.00880039	GO:0072669: tRNA-splicing ligase complex (CC)
10 genes	59	34208	10	2031	0.00231538	0.0101815	GO:0000775: chromosome, centromeric region (CC)
6 genes	24	34208	6	2031	0.00231445	0.0102453	GO:0005689: U12-type spliceosomal complex (CC)
56 genes	642	34208	56	2031	0.00271779	0.0118725	GO:0005789: endoplasmic reticulum membrane (CC)
4 genes	11	34208	4	2031	0.00291693	0.0124957	GO:0071564: npBAF complex (CC)
4 genes	11	34208	4	2031	0.00291693	0.0124957	GO:0014704: intercalated disc (CC)
6 genes	25	34208	6	2031	0.00289408	0.0125599	GO:0031519: PcG protein complex (CC)
11 genes	71	34208	11	2031	0.00298837	0.0127197	GO:0005802: trans-Golgi network (CC)
3 genes	6	34208	3	2031	0.00364836	0.013384	GO:0005786: signal recognition particle, endoplasmic reticulum targeting (CC)
3 genes	6	34208	3	2031	0.00364836	0.013384	GO:0043220: Schmidt-Lanterman incisure (CC)
3 genes	6	34208	3	2031	0.00364836	0.013384	GO:0043596: nuclear replication fork (CC)
3 genes	6	34208	3	2031	0.00364836	0.013384	GO:0005682: U5 snRNP (CC)
3 genes	6	34208	3	2031	0.00364836	0.013384	GO:0005958: DNA-dependent protein kinase-DNA ligase 4 complex (CC)
3 genes	6	34208	3	2031	0.00364836	0.013384	GO:0070761: pre-snoRNP complex (CC)
3 genes	6	34208	3	2031	0.00364836	0.013384	GO:0000125: PCAF complex (CC)
3 genes	6	34208	3	2031	0.00364836	0.013384	GO:0000176: nuclear exosome (RNase complex) (CC)
3 genes	6	34208	3	2031	0.00364836	0.013384	GO:0070419: nonhomologous end joining complex (CC)
2 genes	2	34208	2	2031	0.00352341	0.0136815	GO:0017101: aminoacyl-tRNA synthetase multienzyme complex (CC)
2 genes	2	34208	2	2031	0.00352341	0.0136815	GO:0016507: fatty acid beta-oxidation multienzyme complex (CC)
2 genes	2	34208	2	2031	0.00352341	0.0136815	GO:0045252: oxoglutarate dehydrogenase complex (CC)
2 genes	2	34208	2	2031	0.00352341	0.0136815	GO:0043564: Ku70:Ku80 complex (CC)
2 genes	2	34208	2	2031	0.00352341	0.0136815	GO:0005674: transcription factor TFIIF complex (CC)
2 genes	2	34208	2	2031	0.00352341	0.0136815	GO:0045261: proton-transporting ATP synthase complex, catalytic core F(1) (CC)
2 genes	2	34208	2	2031	0.00352341	0.0136815	GO:0030135: coated vesicle (CC)
2 genes	2	34208	2	2031	0.00352341	0.0136815	GO:0031372: UBC13-MMS2 complex (CC)
2 genes	2	34208	2	2031	0.00352341	0.0136815	GO:0032437: cuticular plate (CC)
2 genes	2	34208	2	2031	0.00352341	0.0136815	GO:0032301: MutSalpha complex (CC)
2 genes	2	34208	2	2031	0.00352341	0.0136815	GO:0045025: mitochondrial degradosome (CC)
2 genes	2	34208	2	2031	0.00352341	0.0136815	GO:0005642: annulate lamellae (CC)
2 genes	2	34208	2	2031	0.00352341	0.0136815	GO:0031213: RSF complex (CC)
6 genes	26	34208	6	2031	0.0035757	0.0138039	GO:0030117: membrane coat (CC)
30 genes	297	34208	30	2031	0.00328501	0.0138933	GO:0009986: cell surface (CC)
13 genes	93	34208	13	2031	0.00333789	0.0140276	GO:0005911: cell-cell junction (CC)
8 genes	44	34208	8	2031	0.00396629	0.0144704	GO:0043204: perikaryon (CC)
4 genes	12	34208	4	2031	0.00417103	0.015052	GO:0001891: phagocytic cup (CC)
4 genes	12	34208	4	2031	0.00417103	0.015052	GO:0071565: nBAF complex (CC)
5 genes	19	34208	5	2031	0.00423386	0.0151144	GO:0010494: cytoplasmic stress granule (CC)
5 genes	19	34208	5	2031	0.00423386	0.0151144	GO:0005871: kinesin complex (CC)
14 genes	107	34208	14	2031	0.0043811	0.0154737	GO:0014069: postsynaptic density (CC)
6 genes	27	34208	6	2031	0.00436962	0.0155156	GO:0000228: nuclear chromosome (CC)
8 genes	46	34208	8	2031	0.00525828	0.0184735	GO:0005905: coated pit (CC)
6 genes	28	34208	6	2031	0.00528624	0.018474	GO:0005637: nuclear inner membrane (CC)
4 genes	13	34208	4	2031	0.00574404	0.01966	GO:0005858: axonemal dynein complex (CC)
4 genes	13	34208	4	2031	0.00574404	0.01966	GO:0001673: male germ cell nucleus (CC)
4 genes	13	34208	4	2031	0.00574404	0.01966	GO:0005746: mitochondrial respiratory chain (CC)
4 genes	13	34208	4	2031	0.00574404	0.01966	GO:0019897: extrinsic to plasma membrane (CC)
3 genes	7	34208	3	2031	0.00610337	0.0202632	GO:0001939: female pronucleus (CC)
3 genes	7	34208	3	2031	0.00610337	0.0202632	GO:0072357: PTW/PP1 phosphatase complex (CC)
3 genes	7	34208	3	2031	0.00610337	0.0202632	GO:0005721: centromeric heterochromatin (CC)
3 genes	7	34208	3	2031	0.00610337	0.0202632	GO:0045120: pronucleus (CC)
3 genes	7	34208	3	2031	0.00610337	0.0202632	GO:0005641: nuclear envelope lumen (CC)
18 genes	158	34208	18	2031	0.00608083	0.020706	GO:0042995: cell projection (CC)
5 genes	21	34208	5	2031	0.00671163	0.022062	GO:0030131: clathrin adaptor complex (CC)
5 genes	21	34208	5	2031	0.00671163	0.022062	GO:0031252: cell leading edge (CC)
8 genes	48	34208	8	2031	0.00684894	0.0224024	GO:0016459: myosin complex (CC)
7 genes	39	34208	7	2031	0.00740981	0.0241182	GO:0031594: neuromuscular junction (CC)
6 genes	30	34208	6	2031	0.00752936	0.0242694	GO:0005902: microvillus (CC)
6 genes	30	34208	6	2031	0.00752936	0.0242694	GO:0030016: myofibril (CC)
4 genes	14	34208	4	2031	0.00766774	0.0245961	GO:0005671: Ada2/Gcn5/Ada3 transcription activator complex (CC)
3 genes	8	34208	3	2031	0.00933658	0.0288348	GO:0005838: proteasome regulatory particle (CC)
3 genes	8	34208	3	2031	0.00933658	0.0288348	GO:0005915: zonula adherens (CC)
3 genes	8	34208	3	2031	0.00933658	0.0288348	GO:0005732: small nucleolar ribonucleoprotein complex (CC)
3 genes	8	34208	3	2031	0.00933658	0.0288348	GO:0034451: centriolar satellite (CC)
3 genes	8	34208	3	2031	0.00933658	0.0288348	GO:0061202: clathrin sculpted gamma-aminobutyric acid transport vesicle membrane (CC)
3 genes	8	34208	3	2031	0.00933658	0.0288348	GO:0001931: uropod (CC)
3 genes	8	34208	3	2031	0.00933658	0.0288348	GO:0005678: chromatin assembly complex (CC)
3 genes	8	34208	3	2031	0.00933658	0.0288348	GO:0016342: catenin complex (CC)
2 genes	3	34208	2	2031	0.0101522	0.0294371	GO:0043227: membrane-bounded organelle (CC)
2 genes	3	34208	2	2031	0.0101522	0.0294371	GO:0071001: U4/U6 snRNP (CC)
2 genes	3	34208	2	2031	0.0101522	0.0294371	GO:0019908: nuclear cyclin-dependent protein kinase holoenzyme complex (CC)
2 genes	3	34208	2	2031	0.0101522	0.0294371	GO:0032444: activin responsive factor complex (CC)
2 genes	3	34208	2	2031	0.0101522	0.0294371	GO:0022626: cytosolic ribosome (CC)
2 genes	3	34208	2	2031	0.0101522	0.0294371	GO:0005850: eukaryotic translation initiation factor 2 complex (CC)
2 genes	3	34208	2	2031	0.0101522	0.0294371	GO:0000942: condensed nuclear chromosome outer kinetochore (CC)
2 genes	3	34208	2	2031	0.0101522	0.0294371	GO:0031932: TORC2 complex (CC)
2 genes	3	34208	2	2031	0.0101522	0.0294371	GO:0043159: acrosomal matrix (CC)
2 genes	3	34208	2	2031	0.0101522	0.0294371	GO:0002193: MAML1-RBP-Jkappa- ICN1 complex (CC)
2 genes	3	34208	2	2031	0.0101522	0.0294371	GO:0031838: haptoglobin-hemoglobin complex (CC)
2 genes	3	34208	2	2031	0.0101522	0.0294371	GO:0033186: CAF-1 complex (CC)
2 genes	3	34208	2	2031	0.0101522	0.0294371	GO:0005899: insulin receptor complex (CC)
11 genes	83	34208	11	2031	0.00987554	0.0303581	GO:0030659: cytoplasmic vesicle membrane (CC)
37 genes	420	34208	37	2031	0.0111454	0.0321763	GO:0000139: Golgi membrane (CC)
5 genes	24	34208	5	2031	0.0120944	0.0344665	GO:0005811: lipid particle (CC)
6 genes	33	34208	6	2031	0.0120723	0.0345519	GO:0030666: endocytic vesicle membrane (CC)
6 genes	33	34208	6	2031	0.0120723	0.0345519	GO:0019898: extrinsic to membrane (CC)
44 genes	523	34208	44	2031	0.013107	0.0371926	GO:0005624: membrane fraction (CC)
3 genes	9	34208	3	2031	0.0133919	0.0372059	GO:0000307: cyclin-dependent protein kinase holoenzyme complex (CC)
3 genes	9	34208	3	2031	0.0133919	0.0372059	GO:0002102: podosome (CC)
3 genes	9	34208	3	2031	0.0133919	0.0372059	GO:0046930: pore complex (CC)
3 genes	9	34208	3	2031	0.0133919	0.0372059	GO:0000783: nuclear telomere cap complex (CC)
3 genes	9	34208	3	2031	0.0133919	0.0372059	GO:0016281: eukaryotic translation initiation factor 4F complex (CC)
9 genes	66	34208	9	2031	0.0156574	0.0433189	GO:0031966: mitochondrial membrane (CC)
4 genes	17	34208	4	2031	0.015815	0.0433933	GO:0000784: nuclear chromosome, telomeric region (CC)
4 genes	17	34208	4	2031	0.015815	0.0433933	GO:0044297: cell body (CC)
6 genes	35	34208	6	2031	0.0160006	0.0437217	GO:0030139: endocytic vesicle (CC)
26 genes	280	34208	26	2031	0.0164191	0.0446816	GO:0005768: endosome (CC)
5 genes	26	34208	5	2031	0.0169704	0.0459932	GO:0016529: sarcoplasmic reticulum (CC)
3 genes	10	34208	3	2031	0.0182967	0.0484024	GO:0043296: apical junction complex (CC)
3 genes	10	34208	3	2031	0.0182967	0.0484024	GO:0043292: contractile fiber (CC)
3 genes	10	34208	3	2031	0.0182967	0.0484024	GO:0033267: axon part (CC)
3 genes	10	34208	3	2031	0.0182967	0.0484024	GO:0035098: ESC/E(Z) complex (CC)
3 genes	10	34208	3	2031	0.0182967	0.0484024	GO:0015934: large ribosomal subunit (CC)
2 genes	4	34208	2	2031	0.0195057	0.0492462	GO:0008278: cohesin complex (CC)
2 genes	4	34208	2	2031	0.0195057	0.0492462	GO:0035749: myelin sheath adaxonal region (CC)
2 genes	4	34208	2	2031	0.0195057	0.0492462	GO:0071141: SMAD protein complex (CC)
2 genes	4	34208	2	2031	0.0195057	0.0492462	GO:0000800: lateral element (CC)
2 genes	4	34208	2	2031	0.0195057	0.0492462	GO:0048500: signal recognition particle (CC)
2 genes	4	34208	2	2031	0.0195057	0.0492462	GO:0035189: Rb-E2F complex (CC)
2 genes	4	34208	2	2031	0.0195057	0.0492462	GO:0032389: MutLalpha complex (CC)
2 genes	4	34208	2	2031	0.0195057	0.0492462	GO:0030686: 90S preribosome (CC)
2 genes	4	34208	2	2031	0.0195057	0.0492462	GO:0044429: mitochondrial part (CC)
2 genes	4	34208	2	2031	0.0195057	0.0492462	GO:0031313: extrinsic to endosome membrane (CC)
2 genes	4	34208	2	2031	0.0195057	0.0492462	GO:0000015: phosphopyruvate hydratase complex (CC)
6 genes	36	34208	6	2031	0.0182618	0.0492919	GO:0009898: internal side of plasma membrane (CC)
5 genes	27	34208	5	2031	0.0198342	0.049886	GO:0030017: sarcomere (CC)

## Sheet: GO biological process analysis
Go biological process analysis
NGR = Number of annotated genes in the reference list;
TNGR = Total number of genes in the reference list;
NG = Number of annotated genes in the input list;
TNG = Total number of genes in the input list;
Hyp = Hypergeometric pValue; Hyp* = Corrected hypergeometric pValue by Benjamini and Hochberg False Discovery Rate (FDR) correction
Genes	NGR	TNGR	NG	TNG	Hyp	Hyp*	Annotations
172 genes	408	34208	172	2031	3.14531e-101	1.08828e-97	GO:0010467: gene expression (BP)
117 genes	329	34208	117	2031	3.06525e-59	5.30289e-56	GO:0016032: viral reproduction (BP)
96 genes	223	34208	96	2031	1.15383e-57	1.33076e-54	GO:0016071: mRNA metabolic process (BP)
102 genes	267	34208	102	2031	3.3828e-55	2.92612e-52	GO:0008380: RNA splicing (BP)
100 genes	257	34208	100	2031	5.1107e-55	3.5366e-52	GO:0016070: RNA metabolic process (BP)
90 genes	241	34208	90	2031	7.65028e-48	4.41166e-45	GO:0006412: translation (BP)
94 genes	284	34208	94	2031	1.11657e-44	5.51905e-42	GO:0044267: cellular protein metabolic process (BP)
71 genes	167	34208	71	2031	1.72742e-42	7.47108e-40	GO:0000398: nuclear mRNA splicing, via spliceosome (BP)
240 genes	1609	34208	240	2031	5.32333e-41	2.04653e-38	GO:0006355: regulation of transcription, DNA-dependent (BP)
53 genes	93	34208	53	2031	1.67521e-40	5.79624e-38	GO:0006414: translational elongation (BP)
94 genes	328	34208	94	2031	9.01048e-39	2.83421e-36	GO:0044419: interspecies interaction between organisms (BP)
51 genes	91	34208	51	2031	1.60588e-38	4.63028e-36	GO:0019058: viral infectious cycle (BP)
86 genes	304	34208	86	2031	4.23744e-35	1.12781e-32	GO:0000278: mitotic cell cycle (BP)
46 genes	82	34208	46	2031	6.69026e-35	1.65345e-32	GO:0019083: viral transcription (BP)
46 genes	87	34208	46	2031	2.46152e-33	5.6779e-31	GO:0006415: translational termination (BP)
101 genes	468	34208	101	2031	3.35482e-30	7.25481e-28	GO:0045893: positive regulation of transcription, DNA-dependent (BP)
50 genes	121	34208	50	2031	1.32042e-29	2.68745e-27	GO:0031018: endocrine pancreas development (BP)
90 genes	401	34208	90	2031	2.32076e-28	4.46101e-26	GO:0045892: negative regulation of transcription, DNA-dependent (BP)
111 genes	594	34208	111	2031	2.36717e-27	4.31075e-25	GO:0006915: apoptotic process (BP)
49 genes	128	34208	49	2031	3.22541e-27	5.57995e-25	GO:0044255: cellular lipid metabolic process (BP)
39 genes	82	34208	39	2031	3.26105e-26	5.37297e-24	GO:0006200: ATP catabolic process (BP)
73 genes	294	34208	73	2031	4.23186e-26	6.65556e-24	GO:0006366: transcription from RNA polymerase II promoter (BP)
29 genes	43	34208	29	2031	7.79314e-26	1.17236e-23	GO:0006418: tRNA aminoacylation for protein translation (BP)
59 genes	202	34208	59	2031	2.73995e-25	3.95009e-23	GO:0006397: mRNA processing (BP)
47 genes	131	34208	47	2031	9.95657e-25	1.37799e-22	GO:0000075: cell cycle checkpoint (BP)
58 genes	200	34208	58	2031	1.04361e-24	1.38881e-22	GO:0034641: cellular nitrogen compound metabolic process (BP)
55 genes	182	34208	55	2031	1.79982e-24	2.30644e-22	GO:0006457: protein folding (BP)
88 genes	435	34208	88	2031	2.18675e-24	2.7022e-22	GO:0007049: cell cycle (BP)
104 genes	578	34208	104	2031	2.36305e-24	2.81936e-22	GO:0045944: positive regulation of transcription from RNA polymerase II promoter (BP)
68 genes	285	34208	68	2031	2.42828e-23	2.80061e-21	GO:0006281: DNA repair (BP)
84 genes	416	34208	84	2031	2.79678e-23	3.12157e-21	GO:0000122: negative regulation of transcription from RNA polymerase II promoter (BP)
39 genes	98	34208	39	2031	1.10519e-22	1.19499e-20	GO:0006006: glucose metabolic process (BP)
57 genes	224	34208	57	2031	3.07876e-21	3.22804e-19	GO:0016568: chromatin modification (BP)
40 genes	112	34208	40	2031	3.56963e-21	3.63262e-19	GO:0000084: S phase of mitotic cell cycle (BP)
33 genes	78	34208	33	2031	2.07936e-20	2.05559e-18	GO:0000216: M/G1 transition of mitotic cell cycle (BP)
37 genes	102	34208	37	2031	5.82336e-20	5.5969e-18	GO:0006334: nucleosome assembly (BP)
45 genes	152	34208	45	2031	6.93972e-20	6.48958e-18	GO:0006260: DNA replication (BP)
24 genes	42	34208	24	2031	4.033e-19	3.67215e-17	GO:0006094: gluconeogenesis (BP)
43 genes	145	34208	43	2031	4.26507e-19	3.78389e-17	GO:0000082: G1/S transition of mitotic cell cycle (BP)
62 genes	290	34208	62	2031	7.93392e-19	6.86284e-17	GO:0005975: carbohydrate metabolic process (BP)
80 genes	457	34208	80	2031	2.74342e-18	2.31518e-16	GO:0007596: blood coagulation (BP)
58 genes	272	34208	58	2031	1.19811e-17	9.87016e-16	GO:0043066: negative regulation of apoptotic process (BP)
19 genes	29	34208	19	2031	5.19432e-17	4.17961e-15	GO:0006635: fatty acid beta-oxidation (BP)
32 genes	92	34208	32	2031	7.73806e-17	6.08493e-15	GO:0006396: RNA processing (BP)
57 genes	286	34208	57	2031	5.65741e-16	4.34992e-14	GO:0051301: cell division (BP)
30 genes	86	34208	30	2031	6.47627e-16	4.87128e-14	GO:0006310: DNA recombination (BP)
24 genes	54	34208	24	2031	7.98251e-16	5.63663e-14	GO:0006338: chromatin remodeling (BP)
28 genes	75	34208	28	2031	7.83739e-16	5.64945e-14	GO:0051439: regulation of ubiquitin-protein ligase activity involved in mitotic cell cycle (BP)
28 genes	75	34208	28	2031	7.83739e-16	5.64945e-14	GO:0001889: liver development (BP)
21 genes	41	34208	21	2031	1.35395e-15	9.36931e-14	GO:0006413: translational initiation (BP)
58 genes	301	34208	58	2031	1.5395e-15	1.04445e-13	GO:0042493: response to drug (BP)
17 genes	26	34208	17	2031	2.48124e-15	1.65098e-13	GO:0006099: tricarboxylic acid cycle (BP)
28 genes	80	34208	28	2031	5.42191e-15	3.53958e-13	GO:0031145: anaphase-promoting complex-dependent proteasomal ubiquitin-dependent protein catabolic process (BP)
25 genes	65	34208	25	2031	1.21714e-14	7.79874e-13	GO:0051436: negative regulation of ubiquitin-protein ligase activity involved in mitotic cell cycle (BP)
35 genes	128	34208	35	2031	1.27346e-14	8.01119e-13	GO:0030036: actin cytoskeleton organization (BP)
30 genes	95	34208	30	2031	1.41017e-14	8.71286e-13	GO:0006928: cellular component movement (BP)
21 genes	45	34208	21	2031	1.50762e-14	8.99375e-13	GO:0006096: glycolysis (BP)
19 genes	36	34208	19	2031	1.49148e-14	9.05354e-13	GO:0051084: 'de novo' posttranslational protein folding (BP)
25 genes	66	34208	25	2031	1.84905e-14	1.08436e-12	GO:0006977: DNA damage response, signal transduction by p53 class mediator resulting in cell cycle arrest (BP)
31 genes	107	34208	31	2031	7.27217e-14	4.19362e-12	GO:0000209: protein polyubiquitination (BP)
21 genes	48	34208	21	2031	7.49997e-14	4.25408e-12	GO:0051289: protein homotetramerization (BP)
44 genes	205	34208	44	2031	7.64755e-14	4.26782e-12	GO:0042981: regulation of apoptotic process (BP)
32 genes	115	34208	32	2031	1.0053e-13	5.52117e-12	GO:0000086: G2/M transition of mitotic cell cycle (BP)
25 genes	71	34208	25	2031	1.3148e-13	7.10814e-12	GO:0051437: positive regulation of ubiquitin-protein ligase activity involved in mitotic cell cycle (BP)
26 genes	77	34208	26	2031	1.34069e-13	7.13658e-12	GO:0055086: nucleobase-containing small molecule metabolic process (BP)
28 genes	90	34208	28	2031	1.61406e-13	8.46159e-12	GO:0006364: rRNA processing (BP)
21 genes	50	34208	21	2031	2.01673e-13	1.04148e-11	GO:0000723: telomere maintenance (BP)
41 genes	187	34208	41	2031	2.53637e-13	1.29057e-11	GO:0007067: mitosis (BP)
44 genes	215	34208	44	2031	4.44905e-13	2.23097e-11	GO:0048011: nerve growth factor receptor signaling pathway (BP)
46 genes	233	34208	46	2031	5.13761e-13	2.53945e-11	GO:0055114: oxidation-reduction process (BP)
28 genes	94	34208	28	2031	5.4144e-13	2.63857e-11	GO:0002474: antigen processing and presentation of peptide antigen via MHC class I (BP)
54 genes	316	34208	54	2031	2.25506e-12	1.08368e-10	GO:0008152: metabolic process (BP)
20 genes	51	34208	20	2031	3.53182e-12	1.67398e-10	GO:0006521: regulation of cellular amino acid metabolic process (BP)
53 genes	312	34208	53	2031	4.55497e-12	2.12976e-10	GO:0008283: cell proliferation (BP)
21 genes	59	34208	21	2031	9.26123e-12	4.27251e-10	GO:0006302: double-strand break repair (BP)
19 genes	49	34208	19	2031	1.55163e-11	7.06398e-10	GO:0006921: cellular component disassembly involved in apoptosis (BP)
12 genes	18	34208	12	2031	2.46857e-11	1.10925e-09	GO:0006103: 2-oxoglutarate metabolic process (BP)
23 genes	77	34208	23	2031	5.91262e-11	2.62278e-09	GO:0006631: fatty acid metabolic process (BP)
27 genes	105	34208	27	2031	6.19215e-11	2.71201e-09	GO:0006351: transcription, DNA-dependent (BP)
20 genes	59	34208	20	2031	8.04196e-11	3.47815e-09	GO:0006406: mRNA export from nucleus (BP)
78 genes	604	34208	78	2031	9.8675e-11	4.21501e-09	GO:0006810: transport (BP)
22 genes	73	34208	22	2031	1.26704e-10	5.34628e-09	GO:0048015: phosphatidylinositol-mediated signaling (BP)
32 genes	150	34208	32	2031	2.15987e-10	9.00379e-09	GO:0006511: ubiquitin-dependent protein catabolic process (BP)
15 genes	34	34208	15	2031	2.41464e-10	9.94602e-09	GO:0006144: purine base metabolic process (BP)
30 genes	136	34208	30	2031	3.32027e-10	1.35155e-08	GO:0006805: xenobiotic metabolic process (BP)
35 genes	179	34208	35	2031	3.93648e-10	1.58375e-08	GO:0001701: in utero embryonic development (BP)
9 genes	11	34208	9	2031	4.44498e-10	1.74769e-08	GO:0006107: oxaloacetate metabolic process (BP)
41 genes	234	34208	41	2031	4.42474e-10	1.75973e-08	GO:0030168: platelet activation (BP)
13 genes	26	34208	13	2031	5.49874e-10	2.13771e-08	GO:0006913: nucleocytoplasmic transport (BP)
37 genes	200	34208	37	2031	6.46263e-10	2.48452e-08	GO:0006916: anti-apoptosis (BP)
22 genes	79	34208	22	2031	6.87213e-10	2.58452e-08	GO:0002576: platelet degranulation (BP)
23 genes	86	34208	23	2031	6.83935e-10	2.60046e-08	GO:0022904: respiratory electron transport chain (BP)
15 genes	37	34208	15	2031	1.02801e-09	3.82466e-08	GO:0006754: ATP biosynthetic process (BP)
23 genes	89	34208	23	2031	1.42805e-09	5.20111e-08	GO:0007584: response to nutrient (BP)
30 genes	144	34208	30	2031	1.4271e-09	5.25293e-08	GO:0009615: response to virus (BP)
56 genes	398	34208	56	2031	1.95236e-09	7.03662e-08	GO:0006468: protein phosphorylation (BP)
26 genes	114	34208	26	2031	2.30889e-09	8.23583e-08	GO:0007568: aging (BP)
14 genes	34	34208	14	2031	2.91569e-09	1.02942e-07	GO:0006284: base-excision repair (BP)
19 genes	64	34208	19	2031	3.04167e-09	1.06305e-07	GO:0030097: hemopoiesis (BP)
40 genes	241	34208	40	2031	3.66501e-09	1.26809e-07	GO:0006629: lipid metabolic process (BP)
19 genes	65	34208	19	2031	4.05923e-09	1.37696e-07	GO:0006139: nucleobase-containing compound metabolic process (BP)
19 genes	65	34208	19	2031	4.05923e-09	1.37696e-07	GO:0006368: transcription elongation from RNA polymerase II promoter (BP)
13 genes	30	34208	13	2031	5.05857e-09	1.68295e-07	GO:0006271: DNA strand elongation involved in DNA replication (BP)
33 genes	178	34208	33	2031	5.03921e-09	1.69278e-07	GO:0043065: positive regulation of apoptotic process (BP)
9 genes	13	34208	9	2031	5.18066e-09	1.70715e-07	GO:0042776: mitochondrial ATP synthesis coupled proton transport (BP)
25 genes	111	34208	25	2031	6.13501e-09	2.00256e-07	GO:0006461: protein complex assembly (BP)
25 genes	112	34208	25	2031	7.45534e-09	2.38847e-07	GO:0014070: response to organic cyclic compound (BP)
56 genes	413	34208	56	2031	7.52542e-09	2.3888e-07	GO:0015031: protein transport (BP)
46 genes	307	34208	46	2031	7.40196e-09	2.39353e-07	GO:0007411: axon guidance (BP)
38 genes	230	34208	38	2031	1.0137e-08	3.18854e-07	GO:0006357: regulation of transcription from RNA polymerase II promoter (BP)
12 genes	27	34208	12	2031	1.39834e-08	4.35878e-07	GO:0051603: proteolysis involved in cellular protein catabolic process (BP)
10 genes	18	34208	10	2031	1.50061e-08	4.63581e-07	GO:0006164: purine nucleotide biosynthetic process (BP)
34 genes	196	34208	34	2031	1.71074e-08	5.23819e-07	GO:0006886: intracellular protein transport (BP)
13 genes	33	34208	13	2031	2.04626e-08	6.21059e-07	GO:0031124: mRNA 3'-end processing (BP)
14 genes	39	34208	14	2031	2.38438e-08	7.17386e-07	GO:0043966: histone H3 acetylation (BP)
15 genes	45	34208	15	2031	2.40863e-08	7.18436e-07	GO:0050434: positive regulation of viral transcription (BP)
6 genes	6	34208	6	2031	4.34984e-08	1.28636e-06	GO:0016584: nucleosome positioning (BP)
10 genes	20	34208	10	2031	5.67593e-08	1.65031e-06	GO:0043967: histone H4 acetylation (BP)
10 genes	20	34208	10	2031	5.67593e-08	1.65031e-06	GO:0016573: histone acetylation (BP)
8 genes	12	34208	8	2031	6.07984e-08	1.73853e-06	GO:0007494: midgut development (BP)
8 genes	12	34208	8	2031	6.07984e-08	1.73853e-06	GO:0043968: histone H2A acetylation (BP)
11 genes	25	34208	11	2031	6.45367e-08	1.8303e-06	GO:0000375: RNA splicing, via transesterification reactions (BP)
47 genes	341	34208	47	2031	7.12985e-08	2.00563e-06	GO:0008285: negative regulation of cell proliferation (BP)
7 genes	9	34208	7	2031	8.33654e-08	2.32616e-06	GO:0006536: glutamate metabolic process (BP)
14 genes	43	34208	14	2031	9.89365e-08	2.73856e-06	GO:0030521: androgen receptor signaling pathway (BP)
19 genes	78	34208	19	2031	1.05281e-07	2.89106e-06	GO:0043524: negative regulation of neuron apoptosis (BP)
28 genes	155	34208	28	2031	1.26019e-07	3.43329e-06	GO:0006950: response to stress (BP)
9 genes	17	34208	9	2031	1.41635e-07	3.82858e-06	GO:0009168: purine ribonucleoside monophosphate biosynthetic process (BP)
15 genes	51	34208	15	2031	1.58739e-07	4.25765e-06	GO:0051028: mRNA transport (BP)
17 genes	67	34208	17	2031	2.5927e-07	6.90058e-06	GO:0006289: nucleotide-excision repair (BP)
7 genes	10	34208	7	2031	2.63519e-07	6.96013e-06	GO:0044262: cellular carbohydrate metabolic process (BP)
9 genes	18	34208	9	2031	2.68265e-07	7.03178e-06	GO:0009083: branched chain family amino acid catabolic process (BP)
15 genes	53	34208	15	2031	2.77981e-07	7.23169e-06	GO:0031100: organ regeneration (BP)
13 genes	40	34208	13	2031	2.90351e-07	7.33295e-06	GO:0000724: double-strand break repair via homologous recombination (BP)
6 genes	7	34208	6	2031	2.89036e-07	7.35343e-06	GO:0006734: NADH metabolic process (BP)
6 genes	7	34208	6	2031	2.89036e-07	7.35343e-06	GO:0043983: histone H4-K12 acetylation (BP)
18 genes	75	34208	18	2031	2.88196e-07	7.44148e-06	GO:0034142: toll-like receptor 4 signaling pathway (BP)
11 genes	29	34208	11	2031	4.01488e-07	1.00663e-05	GO:0043200: response to amino acid stimulus (BP)
18 genes	77	34208	18	2031	4.39894e-07	1.09499e-05	GO:0008063: Toll signaling pathway (BP)
19 genes	85	34208	19	2031	4.47765e-07	1.10662e-05	GO:0000236: mitotic prometaphase (BP)
10 genes	24	34208	10	2031	4.83696e-07	1.18694e-05	GO:0045931: positive regulation of mitotic cell cycle (BP)
24 genes	129	34208	24	2031	5.58189e-07	1.36009e-05	GO:0006974: response to DNA damage stimulus (BP)
15 genes	56	34208	15	2031	6.1046e-07	1.47706e-05	GO:0032869: cellular response to insulin stimulus (BP)
20 genes	95	34208	20	2031	6.2783e-07	1.50854e-05	GO:0016044: cellular membrane organization (BP)
19 genes	87	34208	19	2031	6.56187e-07	1.5658e-05	GO:0050852: T cell receptor signaling pathway (BP)
8 genes	15	34208	8	2031	6.72527e-07	1.5938e-05	GO:0006541: glutamine metabolic process (BP)
7 genes	11	34208	7	2031	6.87249e-07	1.60668e-05	GO:0042274: ribosomal small subunit biogenesis (BP)
7 genes	11	34208	7	2031	6.87249e-07	1.60668e-05	GO:0043984: histone H4-K16 acetylation (BP)
13 genes	43	34208	13	2031	7.46368e-07	1.73318e-05	GO:0043588: skin development (BP)
9 genes	20	34208	9	2031	8.31228e-07	1.91737e-05	GO:0048147: negative regulation of fibroblast proliferation (BP)
11 genes	31	34208	11	2031	8.79809e-07	2.01599e-05	GO:0006749: glutathione metabolic process (BP)
17 genes	73	34208	17	2031	9.67539e-07	2.20242e-05	GO:0002755: MyD88-dependent toll-like receptor signaling pathway (BP)
13 genes	44	34208	13	2031	1.00184e-06	2.26559e-05	GO:0006369: termination of RNA polymerase II transcription (BP)
6 genes	8	34208	6	2031	1.09754e-06	2.44998e-05	GO:0006108: malate metabolic process (BP)
6 genes	8	34208	6	2031	1.09754e-06	2.44998e-05	GO:0019047: provirus integration (BP)
19 genes	90	34208	19	2031	1.13708e-06	2.52198e-05	GO:0007018: microtubule-based movement (BP)
10 genes	26	34208	10	2031	1.17395e-06	2.58717e-05	GO:0006446: regulation of translational initiation (BP)
14 genes	52	34208	14	2031	1.34744e-06	2.95072e-05	GO:0051591: response to cAMP (BP)
9 genes	21	34208	9	2031	1.37773e-06	2.99807e-05	GO:0009987: cellular process (BP)
7 genes	12	34208	7	2031	1.56428e-06	3.36174e-05	GO:0009743: response to carbohydrate stimulus (BP)
59 genes	520	34208	59	2031	1.56176e-06	3.37732e-05	GO:0030154: cell differentiation (BP)
10 genes	27	34208	10	2031	1.7651e-06	3.7699e-05	GO:0048678: response to axon injury (BP)
11 genes	33	34208	11	2031	1.80082e-06	3.8226e-05	GO:0006695: cholesterol biosynthetic process (BP)
16 genes	69	34208	16	2031	2.1302e-06	4.46696e-05	GO:0034134: toll-like receptor 2 signaling pathway (BP)
16 genes	69	34208	16	2031	2.1302e-06	4.46696e-05	GO:0034130: toll-like receptor 1 signaling pathway (BP)
8 genes	17	34208	8	2031	2.28181e-06	4.75607e-05	GO:0006298: mismatch repair (BP)
11 genes	34	34208	11	2031	2.51923e-06	5.21948e-05	GO:0008652: cellular amino acid biosynthetic process (BP)
12 genes	41	34208	12	2031	2.91655e-06	5.97115e-05	GO:0045768: positive regulation of anti-apoptosis (BP)
12 genes	41	34208	12	2031	2.91655e-06	5.97115e-05	GO:0030163: protein catabolic process (BP)
15 genes	63	34208	15	2031	3.0941e-06	6.29741e-05	GO:0034138: toll-like receptor 3 signaling pathway (BP)
6 genes	9	34208	6	2031	3.12588e-06	6.32488e-05	GO:0031325: positive regulation of cellular metabolic process (BP)
7 genes	13	34208	7	2031	3.21452e-06	6.42904e-05	GO:0048699: generation of neurons (BP)
7 genes	13	34208	7	2031	3.21452e-06	6.42904e-05	GO:0015986: ATP synthesis coupled proton transport (BP)
14 genes	56	34208	14	2031	3.53406e-06	6.94764e-05	GO:0000910: cytokinesis (BP)
14 genes	56	34208	14	2031	3.53406e-06	6.94764e-05	GO:0006091: generation of precursor metabolites and energy (BP)
29 genes	192	34208	29	2031	3.51894e-06	6.99744e-05	GO:0016192: vesicle-mediated transport (BP)
12 genes	42	34208	12	2031	3.86291e-06	7.55123e-05	GO:0042542: response to hydrogen peroxide (BP)
8 genes	18	34208	8	2031	3.89265e-06	7.56662e-05	GO:0030099: myeloid cell differentiation (BP)
5 genes	6	34208	5	2031	4.18856e-06	7.91935e-05	GO:0030388: fructose 1,6-bisphosphate metabolic process (BP)
5 genes	6	34208	5	2031	4.18856e-06	7.91935e-05	GO:0007097: nuclear migration (BP)
5 genes	6	34208	5	2031	4.18856e-06	7.91935e-05	GO:0043981: histone H4-K5 acetylation (BP)
5 genes	6	34208	5	2031	4.18856e-06	7.91935e-05	GO:0006102: isocitrate metabolic process (BP)
5 genes	6	34208	5	2031	4.18856e-06	7.91935e-05	GO:0043982: histone H4-K8 acetylation (BP)
15 genes	65	34208	15	2031	4.69533e-06	8.82925e-05	GO:0002756: MyD88-independent toll-like receptor signaling pathway (BP)
11 genes	36	34208	11	2031	4.73819e-06	8.8617e-05	GO:0016310: phosphorylation (BP)
44 genes	361	34208	44	2031	5.26144e-06	9.7874e-05	GO:0008284: positive regulation of cell proliferation (BP)
25 genes	156	34208	25	2031	5.58547e-06	0.000103346	GO:0008219: cell death (BP)
16 genes	74	34208	16	2031	5.64945e-06	0.000103974	GO:0002224: toll-like receptor signaling pathway (BP)
13 genes	51	34208	13	2031	6.22087e-06	0.000113885	GO:0006986: response to unfolded protein (BP)
8 genes	19	34208	8	2031	6.37261e-06	0.000115441	GO:0046686: response to cadmium ion (BP)
8 genes	19	34208	8	2031	6.37261e-06	0.000115441	GO:0000245: spliceosome assembly (BP)
6 genes	10	34208	6	2031	7.41942e-06	0.000133011	GO:0006069: ethanol oxidation (BP)
6 genes	10	34208	6	2031	7.41942e-06	0.000133011	GO:0000050: urea cycle (BP)
23 genes	139	34208	23	2031	7.57134e-06	0.000135035	GO:0008286: insulin receptor signaling pathway (BP)
107 genes	1176	34208	107	2031	7.76669e-06	0.000137809	GO:0007165: signal transduction (BP)
12 genes	45	34208	12	2031	8.50817e-06	0.000150195	GO:0010033: response to organic substance (BP)
8 genes	20	34208	8	2031	1.00669e-05	0.000175916	GO:0008630: DNA damage response, signal transduction resulting in induction of apoptosis (BP)
8 genes	20	34208	8	2031	1.00669e-05	0.000175916	GO:0001702: gastrulation with mouth forming second (BP)
10 genes	32	34208	10	2031	1.02678e-05	0.000178525	GO:0000184: nuclear-transcribed mRNA catabolic process, nonsense-mediated decay (BP)
7 genes	15	34208	7	2031	1.0845e-05	0.00018394	GO:0060612: adipose tissue development (BP)
7 genes	15	34208	7	2031	1.0845e-05	0.00018394	GO:0060045: positive regulation of cardiac muscle cell proliferation (BP)
7 genes	15	34208	7	2031	1.0845e-05	0.00018394	GO:0000070: mitotic sister chromatid segregation (BP)
18 genes	95	34208	18	2031	1.07727e-05	0.000186368	GO:0000087: M phase of mitotic cell cycle (BP)
26 genes	172	34208	26	2031	1.08383e-05	0.000186569	GO:0051056: regulation of small GTPase mediated signal transduction (BP)
4 genes	4	34208	4	2031	1.23914e-05	0.000209143	GO:0043044: ATP-dependent chromatin remodeling (BP)
10 genes	33	34208	10	2031	1.39491e-05	0.000232038	GO:0042059: negative regulation of epidermal growth factor receptor signaling pathway (BP)
5 genes	7	34208	5	2031	1.39374e-05	0.000232963	GO:0006002: fructose 6-phosphate metabolic process (BP)
5 genes	7	34208	5	2031	1.39374e-05	0.000232963	GO:0051131: chaperone-mediated protein complex assembly (BP)
39 genes	317	34208	39	2031	1.41412e-05	0.000234109	GO:0007283: spermatogenesis (BP)
11 genes	40	34208	11	2031	1.46291e-05	0.000241032	GO:0051291: protein heterooligomerization (BP)
26 genes	175	34208	26	2031	1.48279e-05	0.000243149	GO:0001666: response to hypoxia (BP)
6 genes	11	34208	6	2031	1.5498e-05	0.000247111	GO:0060416: response to growth hormone stimulus (BP)
6 genes	11	34208	6	2031	1.5498e-05	0.000247111	GO:0006098: pentose-phosphate shunt (BP)
6 genes	11	34208	6	2031	1.5498e-05	0.000247111	GO:0010269: response to selenium ion (BP)
8 genes	21	34208	8	2031	1.5414e-05	0.000249217	GO:0032201: telomere maintenance via semi-conservative replication (BP)
8 genes	21	34208	8	2031	1.5414e-05	0.000249217	GO:0006270: DNA-dependent DNA replication initiation (BP)
8 genes	21	34208	8	2031	1.5414e-05	0.000249217	GO:0051262: protein tetramerization (BP)
24 genes	156	34208	24	2031	1.72507e-05	0.000273795	GO:0007507: heart development (BP)
12 genes	48	34208	12	2031	1.74578e-05	0.000275817	GO:0000288: nuclear-transcribed mRNA catabolic process, deadenylation-dependent decay (BP)
7 genes	16	34208	7	2031	1.82886e-05	0.000285039	GO:0060334: regulation of interferon-gamma-mediated signaling pathway (BP)
7 genes	16	34208	7	2031	1.82886e-05	0.000285039	GO:0006337: nucleosome disassembly (BP)
7 genes	16	34208	7	2031	1.82886e-05	0.000285039	GO:0007052: mitotic spindle organization (BP)
12 genes	49	34208	12	2031	2.18762e-05	0.000339425	GO:0006469: negative regulation of protein kinase activity (BP)
26 genes	179	34208	26	2031	2.22135e-05	0.000341595	GO:0007420: brain development (BP)
9 genes	28	34208	9	2031	2.21539e-05	0.000342198	GO:0050690: regulation of defense response to virus by virus (BP)
14 genes	65	34208	14	2031	2.24553e-05	0.000343785	GO:0043434: response to peptide hormone stimulus (BP)
8 genes	22	34208	8	2031	2.29601e-05	0.00034843	GO:0008156: negative regulation of DNA replication (BP)
8 genes	22	34208	8	2031	2.29601e-05	0.00034843	GO:0000722: telomere maintenance via recombination (BP)
21 genes	129	34208	21	2031	2.38812e-05	0.000360825	GO:0007050: cell cycle arrest (BP)
19 genes	110	34208	19	2031	2.45647e-05	0.000369539	GO:0006979: response to oxidative stress (BP)
7 genes	17	34208	7	2031	2.94934e-05	0.000434243	GO:0030866: cortical actin cytoskeleton organization (BP)
7 genes	17	34208	7	2031	2.94934e-05	0.000434243	GO:0006637: acyl-CoA metabolic process (BP)
7 genes	17	34208	7	2031	2.94934e-05	0.000434243	GO:0007051: spindle organization (BP)
6 genes	12	34208	6	2031	2.94318e-05	0.000438939	GO:0043101: purine-containing compound salvage (BP)
6 genes	12	34208	6	2031	2.94318e-05	0.000438939	GO:0019059: initiation of viral infection (BP)
9 genes	29	34208	9	2031	3.04328e-05	0.000446176	GO:0010043: response to zinc ion (BP)
14 genes	67	34208	14	2031	3.2226e-05	0.000470473	GO:0051726: regulation of cell cycle (BP)
15 genes	76	34208	15	2031	3.47123e-05	0.000504641	GO:0007173: epidermal growth factor receptor signaling pathway (BP)
5 genes	8	34208	5	2031	3.53371e-05	0.000509443	GO:0006554: lysine catabolic process (BP)
5 genes	8	34208	5	2031	3.53371e-05	0.000509443	GO:0006268: DNA unwinding involved in replication (BP)
14 genes	68	34208	14	2031	3.83804e-05	0.000551021	GO:0006367: transcription initiation from RNA polymerase II promoter (BP)
11 genes	44	34208	11	2031	3.89583e-05	0.000557007	GO:0006283: transcription-coupled nucleotide-excision repair (BP)
9 genes	30	34208	9	2031	4.11893e-05	0.000586481	GO:0042254: ribosome biogenesis (BP)
12 genes	52	34208	12	2031	4.14608e-05	0.000587928	GO:0010629: negative regulation of gene expression (BP)
10 genes	37	34208	10	2031	4.22058e-05	0.000596049	GO:0071456: cellular response to hypoxia (BP)
7 genes	18	34208	7	2031	4.57847e-05	0.000631136	GO:0006261: DNA-dependent DNA replication (BP)
7 genes	18	34208	7	2031	4.57847e-05	0.000631136	GO:0035338: long-chain fatty-acyl-CoA biosynthetic process (BP)
7 genes	18	34208	7	2031	4.57847e-05	0.000631136	GO:0006401: RNA catabolic process (BP)
7 genes	18	34208	7	2031	4.57847e-05	0.000631136	GO:0005980: glycogen catabolic process (BP)
7 genes	18	34208	7	2031	4.57847e-05	0.000631136	GO:0015949: nucleobase-containing small molecule interconversion (BP)
56 genes	543	34208	56	2031	4.53817e-05	0.000638296	GO:0006508: proteolysis (BP)
17 genes	96	34208	17	2031	4.65498e-05	0.000639137	GO:0006936: muscle contraction (BP)
6 genes	13	34208	6	2031	5.19037e-05	0.000704262	GO:0007076: mitotic chromosome condensation (BP)
6 genes	13	34208	6	2031	5.19037e-05	0.000704262	GO:0007062: sister chromatid cohesion (BP)
6 genes	13	34208	6	2031	5.19037e-05	0.000704262	GO:0006978: DNA damage response, signal transduction by p53 class mediator resulting in transcription of p21 class mediator (BP)
14 genes	70	34208	14	2031	5.384e-05	0.00072485	GO:0007265: Ras protein signal transduction (BP)
14 genes	70	34208	14	2031	5.384e-05	0.00072485	GO:0007126: meiosis (BP)
4 genes	5	34208	4	2031	5.90198e-05	0.000761972	GO:0035308: negative regulation of protein dephosphorylation (BP)
4 genes	5	34208	4	2031	5.90198e-05	0.000761972	GO:0071229: cellular response to acid (BP)
4 genes	5	34208	4	2031	5.90198e-05	0.000761972	GO:0046950: cellular ketone body metabolic process (BP)
4 genes	5	34208	4	2031	5.90198e-05	0.000761972	GO:0071398: cellular response to fatty acid (BP)
4 genes	5	34208	4	2031	5.90198e-05	0.000761972	GO:0009113: purine base biosynthetic process (BP)
4 genes	5	34208	4	2031	5.90198e-05	0.000761972	GO:0042178: xenobiotic catabolic process (BP)
4 genes	5	34208	4	2031	5.90198e-05	0.000761972	GO:0006572: tyrosine catabolic process (BP)
4 genes	5	34208	4	2031	5.90198e-05	0.000761972	GO:0046951: ketone body biosynthetic process (BP)
4 genes	5	34208	4	2031	5.90198e-05	0.000761972	GO:0043039: tRNA aminoacylation (BP)
4 genes	5	34208	4	2031	5.90198e-05	0.000761972	GO:0060789: hair follicle placode formation (BP)
11 genes	46	34208	11	2031	6.07271e-05	0.000781099	GO:0071363: cellular response to growth factor stimulus (BP)
13 genes	62	34208	13	2031	5.88944e-05	0.000789824	GO:0032868: response to insulin stimulus (BP)
12 genes	54	34208	12	2031	6.1709e-05	0.000790789	GO:0009058: biosynthetic process (BP)
14 genes	71	34208	14	2031	6.34311e-05	0.000809858	GO:0009636: response to toxin (BP)
7 genes	19	34208	7	2031	6.87752e-05	0.00087486	GO:0043388: positive regulation of DNA binding (BP)
12 genes	55	34208	12	2031	7.46957e-05	0.000943238	GO:0045454: cell redox homeostasis (BP)
12 genes	55	34208	12	2031	7.46957e-05	0.000943238	GO:0000226: microtubule cytoskeleton organization (BP)
5 genes	9	34208	5	2031	7.56011e-05	0.000947753	GO:0006559: L-phenylalanine catabolic process (BP)
5 genes	9	34208	5	2031	7.56011e-05	0.000947753	GO:0006376: mRNA splice site selection (BP)
6 genes	14	34208	6	2031	8.62581e-05	0.00106972	GO:0042176: regulation of protein catabolic process (BP)
6 genes	14	34208	6	2031	8.62581e-05	0.00106972	GO:0051568: histone H3-K4 methylation (BP)
6 genes	14	34208	6	2031	8.62581e-05	0.00106972	GO:0030224: monocyte differentiation (BP)
16 genes	92	34208	16	2031	9.63209e-05	0.00119025	GO:0045471: response to ethanol (BP)
7 genes	20	34208	7	2031	0.000100387	0.00122735	GO:0000083: regulation of transcription involved in G1/S phase of mitotic cell cycle (BP)
7 genes	20	34208	7	2031	0.000100387	0.00122735	GO:0006297: nucleotide-excision repair, DNA gap filling (BP)
7 genes	20	34208	7	2031	0.000100387	0.00122735	GO:0051017: actin filament bundle assembly (BP)
17 genes	102	34208	17	2031	0.000102267	0.00124592	GO:0006112: energy reserve metabolic process (BP)
10 genes	41	34208	10	2031	0.000109272	0.0013266	GO:0045786: negative regulation of cell cycle (BP)
11 genes	49	34208	11	2031	0.000112528	0.00136135	GO:0006520: cellular amino acid metabolic process (BP)
15 genes	84	34208	15	2031	0.000115728	0.00139519	GO:0051384: response to glucocorticoid stimulus (BP)
8 genes	27	34208	8	2031	0.000122067	0.00146143	GO:0051149: positive regulation of muscle cell differentiation (BP)
9 genes	34	34208	9	2031	0.000121705	0.00146215	GO:0031667: response to nutrient levels (BP)
6 genes	15	34208	6	2031	0.000136533	0.00162898	GO:0008299: isoprenoid biosynthetic process (BP)
5 genes	10	34208	5	2031	0.000143783	0.0016864	GO:0033197: response to vitamin E (BP)
5 genes	10	34208	5	2031	0.000143783	0.0016864	GO:0000085: G2 phase of mitotic cell cycle (BP)
5 genes	10	34208	5	2031	0.000143783	0.0016864	GO:0071549: cellular response to dexamethasone stimulus (BP)
5 genes	10	34208	5	2031	0.000143783	0.0016864	GO:0007016: cytoskeletal anchoring at plasma membrane (BP)
7 genes	21	34208	7	2031	0.000142874	0.00169878	GO:0006090: pyruvate metabolic process (BP)
15 genes	86	34208	15	2031	0.000152241	0.00177957	GO:0051260: protein homooligomerization (BP)
9 genes	35	34208	9	2031	0.000155247	0.0018086	GO:0006606: protein import into nucleus (BP)
8 genes	28	34208	8	2031	0.000162033	0.00188132	GO:0042594: response to starvation (BP)
4 genes	6	34208	4	2031	0.000168682	0.00191987	GO:0046632: alpha-beta T cell differentiation (BP)
4 genes	6	34208	4	2031	0.000168682	0.00191987	GO:0006475: internal protein amino acid acetylation (BP)
4 genes	6	34208	4	2031	0.000168682	0.00191987	GO:0007064: mitotic sister chromatid cohesion (BP)
4 genes	6	34208	4	2031	0.000168682	0.00191987	GO:0032508: DNA duplex unwinding (BP)
4 genes	6	34208	4	2031	0.000168682	0.00191987	GO:0033539: fatty acid beta-oxidation using acyl-CoA dehydrogenase (BP)
10 genes	43	34208	10	2031	0.000167644	0.00193996	GO:0008629: induction of apoptosis by intracellular signals (BP)
21 genes	148	34208	21	2031	0.000183469	0.00208132	GO:0046777: protein autophosphorylation (BP)
35 genes	309	34208	35	2031	0.000199441	0.00224048	GO:0045087: innate immune response (BP)
7 genes	22	34208	7	2031	0.000198834	0.00224093	GO:0007163: establishment or maintenance of cell polarity (BP)
7 genes	22	34208	7	2031	0.000198834	0.00224093	GO:0009267: cellular response to starvation (BP)
3 genes	3	34208	3	2031	0.000208998	0.0022884	GO:0000733: DNA strand renaturation (BP)
3 genes	3	34208	3	2031	0.000208998	0.0022884	GO:0000729: DNA double-strand break processing (BP)
3 genes	3	34208	3	2031	0.000208998	0.0022884	GO:0043441: acetoacetic acid biosynthetic process (BP)
3 genes	3	34208	3	2031	0.000208998	0.0022884	GO:0006473: protein acetylation (BP)
3 genes	3	34208	3	2031	0.000208998	0.0022884	GO:0018076: N-terminal peptidyl-lysine acetylation (BP)
3 genes	3	34208	3	2031	0.000208998	0.0022884	GO:0061198: fungiform papilla formation (BP)
6 genes	16	34208	6	2031	0.00020748	0.00231575	GO:0045648: positive regulation of erythrocyte differentiation (BP)
6 genes	16	34208	6	2031	0.00020748	0.00231575	GO:0006662: glycerol ether metabolic process (BP)
43 genes	410	34208	43	2031	0.000228311	0.00249197	GO:0007399: nervous system development (BP)
11 genes	53	34208	11	2031	0.000236559	0.00256581	GO:0051403: stress-activated MAPK cascade (BP)
11 genes	53	34208	11	2031	0.000236559	0.00256581	GO:0050821: protein stabilization (BP)
9 genes	37	34208	9	2031	0.000245638	0.00265596	GO:0030049: muscle filament sliding (BP)
5 genes	11	34208	5	2031	0.000250687	0.00266885	GO:0033540: fatty acid beta-oxidation using acyl-CoA oxidase (BP)
5 genes	11	34208	5	2031	0.000250687	0.00266885	GO:0006303: double-strand break repair via nonhomologous end joining (BP)
5 genes	11	34208	5	2031	0.000250687	0.00266885	GO:0006081: cellular aldehyde metabolic process (BP)
5 genes	11	34208	5	2031	0.000250687	0.00266885	GO:0006275: regulation of DNA replication (BP)
12 genes	62	34208	12	2031	0.00025019	0.00269675	GO:0040008: regulation of growth (BP)
7 genes	23	34208	7	2031	0.000271223	0.00287862	GO:0045739: positive regulation of DNA repair (BP)
8 genes	30	34208	8	2031	0.000274339	0.00290279	GO:0006370: mRNA capping (BP)
21 genes	153	34208	21	2031	0.000292277	0.00308316	GO:0016567: protein ubiquitination (BP)
6 genes	17	34208	6	2031	0.000304564	0.00317407	GO:0007031: peroxisome organization (BP)
6 genes	17	34208	6	2031	0.000304564	0.00317407	GO:0071277: cellular response to calcium ion (BP)
6 genes	17	34208	6	2031	0.000304564	0.00317407	GO:0051693: actin filament capping (BP)
6 genes	17	34208	6	2031	0.000304564	0.00317407	GO:0035162: embryonic hemopoiesis (BP)
8 genes	31	34208	8	2031	0.000350635	0.00363232	GO:0031532: actin cytoskeleton reorganization (BP)
8 genes	31	34208	8	2031	0.000350635	0.00363232	GO:0010827: regulation of glucose transport (BP)
7 genes	24	34208	7	2031	0.000363363	0.00374177	GO:0006309: DNA fragmentation involved in apoptotic nuclear change (BP)
7 genes	24	34208	7	2031	0.000363363	0.00374177	GO:0016358: dendrite development (BP)
10 genes	47	34208	10	2031	0.00036449	0.00374224	GO:0032526: response to retinoic acid (BP)
9 genes	39	34208	9	2031	0.000375822	0.00375822	GO:0030512: negative regulation of transforming growth factor beta receptor signaling pathway (BP)
4 genes	7	34208	4	2031	0.000375009	0.00376096	GO:0000380: alternative nuclear mRNA splicing, via spliceosome (BP)
4 genes	7	34208	4	2031	0.000375009	0.00376096	GO:0045588: positive regulation of gamma-delta T cell differentiation (BP)
4 genes	7	34208	4	2031	0.000375009	0.00376096	GO:0032727: positive regulation of interferon-alpha production (BP)
4 genes	7	34208	4	2031	0.000375009	0.00376096	GO:0042026: protein refolding (BP)
4 genes	7	34208	4	2031	0.000375009	0.00376096	GO:0006101: citrate metabolic process (BP)
4 genes	7	34208	4	2031	0.000375009	0.00376096	GO:0031065: positive regulation of histone deacetylation (BP)
4 genes	7	34208	4	2031	0.000375009	0.00376096	GO:0048096: chromatin-mediated maintenance of transcription (BP)
4 genes	7	34208	4	2031	0.000375009	0.00376096	GO:0006221: pyrimidine nucleotide biosynthetic process (BP)
5 genes	12	34208	5	2031	0.000408726	0.00405212	GO:0014065: phosphatidylinositol 3-kinase cascade (BP)
5 genes	12	34208	5	2031	0.000408726	0.00405212	GO:0032784: regulation of transcription elongation, DNA-dependent (BP)
5 genes	12	34208	5	2031	0.000408726	0.00405212	GO:0046034: ATP metabolic process (BP)
16 genes	104	34208	16	2031	0.000414377	0.00409641	GO:0010628: positive regulation of gene expression (BP)
6 genes	18	34208	6	2031	0.000433954	0.00426557	GO:0007017: microtubule-based process (BP)
6 genes	18	34208	6	2031	0.000433954	0.00426557	GO:0034504: protein localization to nucleus (BP)
13 genes	75	34208	13	2031	0.00043735	0.00428677	GO:0031295: T cell costimulation (BP)
8 genes	32	34208	8	2031	0.00044335	0.0043333	GO:0014823: response to activity (BP)
9 genes	40	34208	9	2031	0.000459605	0.00447953	GO:0050680: negative regulation of epithelial cell proliferation (BP)
7 genes	25	34208	7	2031	0.000478941	0.00464184	GO:0040014: regulation of multicellular organism growth (BP)
7 genes	25	34208	7	2031	0.000478941	0.00464184	GO:0043392: negative regulation of DNA binding (BP)
13 genes	76	34208	13	2031	0.000499302	0.00482565	GO:0001822: kidney development (BP)
11 genes	58	34208	11	2031	0.000537975	0.00518494	GO:0009725: response to hormone stimulus (BP)
20 genes	150	34208	20	2031	0.000588208	0.00565333	GO:0006464: protein modification process (BP)
6 genes	19	34208	6	2031	0.000602498	0.00572704	GO:0006306: DNA methylation (BP)
6 genes	19	34208	6	2031	0.000602498	0.00572704	GO:0042744: hydrogen peroxide catabolic process (BP)
6 genes	19	34208	6	2031	0.000602498	0.00572704	GO:0045773: positive regulation of axon extension (BP)
6 genes	19	34208	6	2031	0.000602498	0.00572704	GO:0016575: histone deacetylation (BP)
81 genes	945	34208	81	2031	0.000613972	0.00582012	GO:0007275: multicellular organismal development (BP)
5 genes	13	34208	5	2031	0.00063174	0.0058917	GO:0030833: regulation of actin filament polymerization (BP)
5 genes	13	34208	5	2031	0.00063174	0.0058917	GO:0048009: insulin-like growth factor receptor signaling pathway (BP)
5 genes	13	34208	5	2031	0.00063174	0.0058917	GO:0045445: myoblast differentiation (BP)
5 genes	13	34208	5	2031	0.00063174	0.0058917	GO:0071777: positive regulation of cell cycle cytokinesis (BP)
5 genes	13	34208	5	2031	0.00063174	0.0058917	GO:0051272: positive regulation of cellular component movement (BP)
5 genes	13	34208	5	2031	0.00063174	0.0058917	GO:0070542: response to fatty acid (BP)
20 genes	151	34208	20	2031	0.000640854	0.00596063	GO:0006184: GTP catabolic process (BP)
4 genes	8	34208	4	2031	0.00071468	0.00652452	GO:0006105: succinate metabolic process (BP)
4 genes	8	34208	4	2031	0.00071468	0.00652452	GO:0016446: somatic hypermutation of immunoglobulin genes (BP)
4 genes	8	34208	4	2031	0.00071468	0.00652452	GO:0016574: histone ubiquitination (BP)
4 genes	8	34208	4	2031	0.00071468	0.00652452	GO:0031929: TOR signaling cascade (BP)
4 genes	8	34208	4	2031	0.00071468	0.00652452	GO:0033151: V(D)J recombination (BP)
4 genes	8	34208	4	2031	0.00071468	0.00652452	GO:0006853: carnitine shuttle (BP)
4 genes	8	34208	4	2031	0.00071468	0.00652452	GO:0046784: intronless viral mRNA export from host nucleus (BP)
14 genes	89	34208	14	2031	0.000740786	0.00674506	GO:0032355: response to estradiol stimulus (BP)
3 genes	4	34208	3	2031	0.000798819	0.0070508	GO:0015853: adenine transport (BP)
3 genes	4	34208	3	2031	0.000798819	0.0070508	GO:0046796: viral genome transport in host cell (BP)
3 genes	4	34208	3	2031	0.000798819	0.0070508	GO:0006432: phenylalanyl-tRNA aminoacylation (BP)
3 genes	4	34208	3	2031	0.000798819	0.0070508	GO:0060742: epithelial cell differentiation involved in prostate gland development (BP)
3 genes	4	34208	3	2031	0.000798819	0.0070508	GO:0006207: 'de novo' pyrimidine base biosynthetic process (BP)
3 genes	4	34208	3	2031	0.000798819	0.0070508	GO:0006222: UMP biosynthetic process (BP)
3 genes	4	34208	3	2031	0.000798819	0.0070508	GO:0035088: establishment or maintenance of apical/basal cell polarity (BP)
3 genes	4	34208	3	2031	0.000798819	0.0070508	GO:0051707: response to other organism (BP)
3 genes	4	34208	3	2031	0.000798819	0.0070508	GO:0006544: glycine metabolic process (BP)
7 genes	27	34208	7	2031	0.000796996	0.00720001	GO:0048589: developmental growth (BP)
7 genes	27	34208	7	2031	0.000796996	0.00720001	GO:0060338: regulation of type I interferon-mediated signaling pathway (BP)
12 genes	70	34208	12	2031	0.000794634	0.00721636	GO:0008584: male gonad development (BP)
14 genes	90	34208	14	2031	0.000830074	0.00730803	GO:0008360: regulation of cell shape (BP)
5 genes	14	34208	5	2031	0.000934785	0.00816757	GO:0001659: temperature homeostasis (BP)
5 genes	14	34208	5	2031	0.000934785	0.00816757	GO:0009060: aerobic respiration (BP)
5 genes	14	34208	5	2031	0.000934785	0.00816757	GO:0016925: protein sumoylation (BP)
11 genes	62	34208	11	2031	0.00096606	0.00839842	GO:0030336: negative regulation of cell migration (BP)
11 genes	62	34208	11	2031	0.00096606	0.00839842	GO:0034097: response to cytokine stimulus (BP)
33 genes	312	34208	33	2031	0.000994806	0.00862664	GO:0007264: small GTPase mediated signal transduction (BP)
8 genes	36	34208	8	2031	0.00103202	0.00890469	GO:0033138: positive regulation of peptidyl-serine phosphorylation (BP)
8 genes	36	34208	8	2031	0.00103202	0.00890469	GO:0010243: response to organic nitrogen (BP)
14 genes	92	34208	14	2031	0.00103605	0.00891725	GO:0051092: positive regulation of NF-kappaB transcription factor activity (BP)
6 genes	21	34208	6	2031	0.00108761	0.00929171	GO:0034644: cellular response to UV (BP)
6 genes	21	34208	6	2031	0.00108761	0.00929171	GO:0042771: DNA damage response, signal transduction by p53 class mediator resulting in induction of apoptosis (BP)
6 genes	21	34208	6	2031	0.00108761	0.00929171	GO:0006699: bile acid biosynthetic process (BP)
9 genes	45	34208	9	2031	0.00113978	0.0097134	GO:0009612: response to mechanical stimulus (BP)
10 genes	54	34208	10	2031	0.00115412	0.00981142	GO:0043433: negative regulation of sequence-specific DNA binding transcription factor activity (BP)
4 genes	9	34208	4	2031	0.00122594	0.0101966	GO:0070989: oxidative demethylation (BP)
4 genes	9	34208	4	2031	0.00122594	0.0101966	GO:0071157: negative regulation of cell cycle arrest (BP)
4 genes	9	34208	4	2031	0.00122594	0.0101966	GO:0006119: oxidative phosphorylation (BP)
4 genes	9	34208	4	2031	0.00122594	0.0101966	GO:0045638: negative regulation of myeloid cell differentiation (BP)
4 genes	9	34208	4	2031	0.00122594	0.0101966	GO:0006333: chromatin assembly or disassembly (BP)
4 genes	9	34208	4	2031	0.00122594	0.0101966	GO:0006265: DNA topological change (BP)
4 genes	9	34208	4	2031	0.00122594	0.0101966	GO:0021680: cerebellar Purkinje cell layer development (BP)
4 genes	9	34208	4	2031	0.00122594	0.0101966	GO:0030220: platelet formation (BP)
4 genes	9	34208	4	2031	0.00122594	0.0101966	GO:0048488: synaptic vesicle endocytosis (BP)
8 genes	37	34208	8	2031	0.00124895	0.0103382	GO:0021987: cerebral cortex development (BP)
8 genes	37	34208	8	2031	0.00124895	0.0103382	GO:0007595: lactation (BP)
7 genes	29	34208	7	2031	0.00126208	0.0103971	GO:0030218: erythrocyte differentiation (BP)
7 genes	29	34208	7	2031	0.00126208	0.0103971	GO:0034613: cellular protein localization (BP)
14 genes	94	34208	14	2031	0.00128332	0.010547	GO:0007517: muscle organ development (BP)
5 genes	15	34208	5	2031	0.00133391	0.010911	GO:0048593: camera-type eye morphogenesis (BP)
5 genes	15	34208	5	2031	0.00133391	0.010911	GO:0045333: cellular respiration (BP)
6 genes	22	34208	6	2031	0.00142091	0.0115678	GO:0001836: release of cytochrome c from mitochondria (BP)
6 genes	22	34208	6	2031	0.00142091	0.0115678	GO:0010035: response to inorganic substance (BP)
15 genes	106	34208	15	2031	0.00149103	0.0120536	GO:0050900: leukocyte migration (BP)
15 genes	106	34208	15	2031	0.00149103	0.0120536	GO:0008624: induction of apoptosis by extracellular signals (BP)
12 genes	75	34208	12	2031	0.0014847	0.0120588	GO:0009791: post-embryonic development (BP)
17 genes	128	34208	17	2031	0.00152918	0.0123332	GO:0009790: embryo development (BP)
4 genes	10	34208	4	2031	0.00194738	0.0144902	GO:0046689: response to mercury ion (BP)
4 genes	10	34208	4	2031	0.00194738	0.0144902	GO:0043923: positive regulation by host of viral transcription (BP)
4 genes	10	34208	4	2031	0.00194738	0.0144902	GO:0000731: DNA synthesis involved in DNA repair (BP)
4 genes	10	34208	4	2031	0.00194738	0.0144902	GO:0045579: positive regulation of B cell differentiation (BP)
4 genes	10	34208	4	2031	0.00194738	0.0144902	GO:0051881: regulation of mitochondrial membrane potential (BP)
4 genes	10	34208	4	2031	0.00194738	0.0144902	GO:0055015: ventricular cardiac muscle cell development (BP)
4 genes	10	34208	4	2031	0.00194738	0.0144902	GO:0048025: negative regulation of nuclear mRNA splicing, via spliceosome (BP)
4 genes	10	34208	4	2031	0.00194738	0.0144902	GO:0045176: apical protein localization (BP)
4 genes	10	34208	4	2031	0.00194738	0.0144902	GO:0015671: oxygen transport (BP)
4 genes	10	34208	4	2031	0.00194738	0.0144902	GO:0008340: determination of adult lifespan (BP)
3 genes	5	34208	3	2031	0.00190852	0.0145131	GO:0032876: negative regulation of DNA endoreduplication (BP)
3 genes	5	34208	3	2031	0.00190852	0.0145131	GO:0051098: regulation of binding (BP)
3 genes	5	34208	3	2031	0.00190852	0.0145131	GO:0006000: fructose metabolic process (BP)
3 genes	5	34208	3	2031	0.00190852	0.0145131	GO:0016447: somatic recombination of immunoglobulin gene segments (BP)
3 genes	5	34208	3	2031	0.00190852	0.0145131	GO:0030705: cytoskeleton-dependent intracellular transport (BP)
3 genes	5	34208	3	2031	0.00190852	0.0145131	GO:0051096: positive regulation of helicase activity (BP)
3 genes	5	34208	3	2031	0.00190852	0.0145131	GO:0070389: chaperone cofactor-dependent protein refolding (BP)
3 genes	5	34208	3	2031	0.00190852	0.0145131	GO:0060206: estrous cycle phase (BP)
3 genes	5	34208	3	2031	0.00190852	0.0145131	GO:0070934: CRD-mediated mRNA stabilization (BP)
3 genes	5	34208	3	2031	0.00190852	0.0145131	GO:0022614: membrane to membrane docking (BP)
3 genes	5	34208	3	2031	0.00190852	0.0145131	GO:0000389: nuclear mRNA 3'-splice site recognition (BP)
3 genes	5	34208	3	2031	0.00190852	0.0145131	GO:0000281: cytokinesis after mitosis (BP)
3 genes	5	34208	3	2031	0.00190852	0.0145131	GO:0006084: acetyl-CoA metabolic process (BP)
3 genes	5	34208	3	2031	0.00190852	0.0145131	GO:2000045: regulation of G1/S transition of mitotic cell cycle (BP)
3 genes	5	34208	3	2031	0.00190852	0.0145131	GO:0042737: drug catabolic process (BP)
3 genes	5	34208	3	2031	0.00190852	0.0145131	GO:0033119: negative regulation of RNA splicing (BP)
3 genes	5	34208	3	2031	0.00190852	0.0145131	GO:0045910: negative regulation of DNA recombination (BP)
5 genes	16	34208	5	2031	0.00184592	0.014582	GO:0070207: protein homotrimerization (BP)
5 genes	16	34208	5	2031	0.00184592	0.014582	GO:0006891: intra-Golgi vesicle-mediated transport (BP)
5 genes	16	34208	5	2031	0.00184592	0.014582	GO:0005978: glycogen biosynthetic process (BP)
5 genes	16	34208	5	2031	0.00184592	0.014582	GO:0009116: nucleoside metabolic process (BP)
6 genes	23	34208	6	2031	0.00182668	0.0145965	GO:0051496: positive regulation of stress fiber assembly (BP)
6 genes	23	34208	6	2031	0.00182668	0.0145965	GO:0006944: cellular membrane fusion (BP)
6 genes	23	34208	6	2031	0.00182668	0.0145965	GO:0000289: nuclear-transcribed mRNA poly(A) tail shortening (BP)
6 genes	23	34208	6	2031	0.00182668	0.0145965	GO:0070301: cellular response to hydrogen peroxide (BP)
9 genes	48	34208	9	2031	0.00183803	0.0146534	GO:0007519: skeletal muscle tissue development (BP)
13 genes	88	34208	13	2031	0.00202989	0.0150717	GO:0008202: steroid metabolic process (BP)
12 genes	78	34208	12	2031	0.00209581	0.0155278	GO:0008543: fibroblast growth factor receptor signaling pathway (BP)
8 genes	40	34208	8	2031	0.00212377	0.0157014	GO:0006892: post-Golgi vesicle-mediated transport (BP)
9 genes	49	34208	9	2031	0.00213478	0.0157492	GO:0009408: response to heat (BP)
15 genes	110	34208	15	2031	0.00216721	0.0159544	GO:0006897: endocytosis (BP)
6 genes	24	34208	6	2031	0.00231445	0.0168945	GO:0042246: tissue regeneration (BP)
6 genes	24	34208	6	2031	0.00231445	0.0168945	GO:0043928: exonucleolytic nuclear-transcribed mRNA catabolic process involved in deadenylation-dependent decay (BP)
6 genes	24	34208	6	2031	0.00231445	0.0168945	GO:0006890: retrograde vesicle-mediated transport, Golgi to ER (BP)
6 genes	24	34208	6	2031	0.00231445	0.0168945	GO:0033574: response to testosterone stimulus (BP)
7 genes	32	34208	7	2031	0.00232861	0.0169621	GO:0032436: positive regulation of proteasomal ubiquitin-dependent protein catabolic process (BP)
31 genes	303	34208	31	2031	0.00233749	0.016991	GO:0035556: intracellular signal transduction (BP)
5 genes	17	34208	5	2031	0.00248816	0.0178241	GO:0006611: protein export from nucleus (BP)
5 genes	17	34208	5	2031	0.00248816	0.0178241	GO:0031397: negative regulation of protein ubiquitination (BP)
5 genes	17	34208	5	2031	0.00248816	0.0178241	GO:0000381: regulation of alternative nuclear mRNA splicing, via spliceosome (BP)
5 genes	17	34208	5	2031	0.00248816	0.0178241	GO:0007088: regulation of mitosis (BP)
5 genes	17	34208	5	2031	0.00248816	0.0178241	GO:0045859: regulation of protein kinase activity (BP)
9 genes	50	34208	9	2031	0.00246845	0.0178678	GO:0050790: regulation of catalytic activity (BP)
9 genes	50	34208	9	2031	0.00246845	0.0178678	GO:0015992: proton transport (BP)
13 genes	91	34208	13	2031	0.00275051	0.0196627	GO:0007154: cell communication (BP)
7 genes	33	34208	7	2031	0.00280612	0.0199777	GO:0045165: cell fate commitment (BP)
7 genes	33	34208	7	2031	0.00280612	0.0199777	GO:0019432: triglyceride biosynthetic process (BP)
9 genes	51	34208	9	2031	0.00284215	0.0201927	GO:0007254: JNK cascade (BP)
4 genes	11	34208	4	2031	0.00291693	0.020389	GO:2000145: regulation of cell motility (BP)
4 genes	11	34208	4	2031	0.00291693	0.020389	GO:0022408: negative regulation of cell-cell adhesion (BP)
4 genes	11	34208	4	2031	0.00291693	0.020389	GO:0042149: cellular response to glucose starvation (BP)
4 genes	11	34208	4	2031	0.00291693	0.020389	GO:0048821: erythrocyte development (BP)
4 genes	11	34208	4	2031	0.00291693	0.020389	GO:0007004: telomere maintenance via telomerase (BP)
8 genes	42	34208	8	2031	0.00293391	0.0204252	GO:0008645: hexose transport (BP)
8 genes	42	34208	8	2031	0.00293391	0.0204252	GO:0030334: regulation of cell migration (BP)
6 genes	25	34208	6	2031	0.00289408	0.0204358	GO:0046326: positive regulation of glucose import (BP)
6 genes	25	34208	6	2031	0.00289408	0.0204358	GO:0006730: one-carbon metabolic process (BP)
6 genes	25	34208	6	2031	0.00289408	0.0204358	GO:0007159: leukocyte cell-cell adhesion (BP)
10 genes	61	34208	10	2031	0.00298501	0.0207392	GO:0015758: glucose transport (BP)
3 genes	6	34208	3	2031	0.00364836	0.0211801	GO:0034333: adherens junction assembly (BP)
3 genes	6	34208	3	2031	0.00364836	0.0211801	GO:0032873: negative regulation of stress-activated MAPK cascade (BP)
3 genes	6	34208	3	2031	0.00364836	0.0211801	GO:0007090: regulation of S phase of mitotic cell cycle (BP)
3 genes	6	34208	3	2031	0.00364836	0.0211801	GO:0000956: nuclear-transcribed mRNA catabolic process (BP)
3 genes	6	34208	3	2031	0.00364836	0.0211801	GO:0071901: negative regulation of protein serine/threonine kinase activity (BP)
3 genes	6	34208	3	2031	0.00364836	0.0211801	GO:0006282: regulation of DNA repair (BP)
3 genes	6	34208	3	2031	0.00364836	0.0211801	GO:0051103: DNA ligation involved in DNA repair (BP)
3 genes	6	34208	3	2031	0.00364836	0.0211801	GO:0006997: nucleus organization (BP)
3 genes	6	34208	3	2031	0.00364836	0.0211801	GO:0055012: ventricular cardiac muscle cell differentiation (BP)
3 genes	6	34208	3	2031	0.00364836	0.0211801	GO:0033153: T cell receptor V(D)J recombination (BP)
3 genes	6	34208	3	2031	0.00364836	0.0211801	GO:0045793: positive regulation of cell size (BP)
3 genes	6	34208	3	2031	0.00364836	0.0211801	GO:0006537: glutamate biosynthetic process (BP)
3 genes	6	34208	3	2031	0.00364836	0.0211801	GO:0008608: attachment of spindle microtubules to kinetochore (BP)
3 genes	6	34208	3	2031	0.00364836	0.0211801	GO:0000028: ribosomal small subunit assembly (BP)
3 genes	6	34208	3	2031	0.00364836	0.0211801	GO:0047497: mitochondrion transport along microtubule (BP)
3 genes	6	34208	3	2031	0.00364836	0.0211801	GO:0034501: protein localization to kinetochore (BP)
3 genes	6	34208	3	2031	0.00364836	0.0211801	GO:0014075: response to amine stimulus (BP)
3 genes	6	34208	3	2031	0.00364836	0.0211801	GO:0007089: traversing start control point of mitotic cell cycle (BP)
3 genes	6	34208	3	2031	0.00364836	0.0211801	GO:0010592: positive regulation of lamellipodium assembly (BP)
3 genes	6	34208	3	2031	0.00364836	0.0211801	GO:0000710: meiotic mismatch repair (BP)
3 genes	6	34208	3	2031	0.00364836	0.0211801	GO:0046134: pyrimidine nucleoside biosynthetic process (BP)
3 genes	6	34208	3	2031	0.00364836	0.0211801	GO:0051099: positive regulation of binding (BP)
3 genes	6	34208	3	2031	0.00364836	0.0211801	GO:0032964: collagen biosynthetic process (BP)
3 genes	6	34208	3	2031	0.00364836	0.0211801	GO:0048675: axon extension (BP)
14 genes	105	34208	14	2031	0.0036882	0.0213755	GO:0006470: protein dephosphorylation (BP)
2 genes	2	34208	2	2031	0.00352341	0.0213877	GO:0031134: sister chromatid biorientation (BP)
2 genes	2	34208	2	2031	0.00352341	0.0213877	GO:0006421: asparaginyl-tRNA aminoacylation (BP)
2 genes	2	34208	2	2031	0.00352341	0.0213877	GO:0055081: anion homeostasis (BP)
2 genes	2	34208	2	2031	0.00352341	0.0213877	GO:0048638: regulation of developmental growth (BP)
2 genes	2	34208	2	2031	0.00352341	0.0213877	GO:0071930: negative regulation of transcription involved in G1/S phase of mitotic cell cycle (BP)
2 genes	2	34208	2	2031	0.00352341	0.0213877	GO:0071344: diphosphate metabolic process (BP)
2 genes	2	34208	2	2031	0.00352341	0.0213877	GO:0019550: glutamate catabolic process to aspartate (BP)
2 genes	2	34208	2	2031	0.00352341	0.0213877	GO:0060968: regulation of gene silencing (BP)
2 genes	2	34208	2	2031	0.00352341	0.0213877	GO:0000019: regulation of mitotic recombination (BP)
2 genes	2	34208	2	2031	0.00352341	0.0213877	GO:0006015: 5-phosphoribose 1-diphosphate biosynthetic process (BP)
2 genes	2	34208	2	2031	0.00352341	0.0213877	GO:0007549: dosage compensation (BP)
2 genes	2	34208	2	2031	0.00352341	0.0213877	GO:0043558: regulation of translational initiation in response to stress (BP)
2 genes	2	34208	2	2031	0.00352341	0.0213877	GO:0071548: response to dexamethasone stimulus (BP)
2 genes	2	34208	2	2031	0.00352341	0.0213877	GO:0019551: glutamate catabolic process to 2-oxoglutarate (BP)
2 genes	2	34208	2	2031	0.00352341	0.0213877	GO:0006426: glycyl-tRNA aminoacylation (BP)
2 genes	2	34208	2	2031	0.00352341	0.0213877	GO:0006531: aspartate metabolic process (BP)
2 genes	2	34208	2	2031	0.00352341	0.0213877	GO:0006288: base-excision repair, DNA ligation (BP)
2 genes	2	34208	2	2031	0.00352341	0.0213877	GO:0034284: response to monosaccharide stimulus (BP)
2 genes	2	34208	2	2031	0.00352341	0.0213877	GO:0070125: mitochondrial translational elongation (BP)
2 genes	2	34208	2	2031	0.00352341	0.0213877	GO:0006011: UDP-glucose metabolic process (BP)
2 genes	2	34208	2	2031	0.00352341	0.0213877	GO:0046322: negative regulation of fatty acid oxidation (BP)
2 genes	2	34208	2	2031	0.00352341	0.0213877	GO:0006532: aspartate biosynthetic process (BP)
2 genes	2	34208	2	2031	0.00352341	0.0213877	GO:0035617: stress granule disassembly (BP)
2 genes	2	34208	2	2031	0.00352341	0.0213877	GO:2000146: negative regulation of cell motility (BP)
2 genes	2	34208	2	2031	0.00352341	0.0213877	GO:0006428: isoleucyl-tRNA aminoacylation (BP)
2 genes	2	34208	2	2031	0.00352341	0.0213877	GO:0071035: nuclear polyadenylation-dependent rRNA catabolic process (BP)
2 genes	2	34208	2	2031	0.00352341	0.0213877	GO:0032796: uropod organization (BP)
2 genes	2	34208	2	2031	0.00352341	0.0213877	GO:0000059: protein import into nucleus, docking (BP)
2 genes	2	34208	2	2031	0.00352341	0.0213877	GO:0030997: regulation of centriole-centriole cohesion (BP)
2 genes	2	34208	2	2031	0.00352341	0.0213877	GO:0031442: positive regulation of mRNA 3'-end processing (BP)
2 genes	2	34208	2	2031	0.00352341	0.0213877	GO:0090343: positive regulation of cell aging (BP)
2 genes	2	34208	2	2031	0.00352341	0.0213877	GO:0021678: third ventricle development (BP)
2 genes	2	34208	2	2031	0.00352341	0.0213877	GO:0051797: regulation of hair follicle development (BP)
2 genes	2	34208	2	2031	0.00352341	0.0213877	GO:0006740: NADPH regeneration (BP)
2 genes	2	34208	2	2031	0.00352341	0.0213877	GO:0006097: glyoxylate cycle (BP)
2 genes	2	34208	2	2031	0.00352341	0.0213877	GO:0019682: glyceraldehyde-3-phosphate metabolic process (BP)
2 genes	2	34208	2	2031	0.00352341	0.0213877	GO:0034770: histone H4-K20 methylation (BP)
2 genes	2	34208	2	2031	0.00352341	0.0213877	GO:0006526: arginine biosynthetic process (BP)
2 genes	2	34208	2	2031	0.00352341	0.0213877	GO:0070816: phosphorylation of RNA polymerase II C-terminal domain (BP)
2 genes	2	34208	2	2031	0.00352341	0.0213877	GO:0003290: atrial septum secundum morphogenesis (BP)
2 genes	2	34208	2	2031	0.00352341	0.0213877	GO:0035357: peroxisome proliferator activated receptor signaling pathway (BP)
2 genes	2	34208	2	2031	0.00352341	0.0213877	GO:0046661: male sex differentiation (BP)
2 genes	2	34208	2	2031	0.00352341	0.0213877	GO:0034418: urate biosynthetic process (BP)
2 genes	2	34208	2	2031	0.00352341	0.0213877	GO:0000279: M phase (BP)
2 genes	2	34208	2	2031	0.00352341	0.0213877	GO:0071864: positive regulation of cell proliferation in bone marrow (BP)
2 genes	2	34208	2	2031	0.00352341	0.0213877	GO:0010963: regulation of L-arginine import (BP)
2 genes	2	34208	2	2031	0.00352341	0.0213877	GO:0007000: nucleolus organization (BP)
2 genes	2	34208	2	2031	0.00352341	0.0213877	GO:0000958: mitochondrial mRNA catabolic process (BP)
2 genes	2	34208	2	2031	0.00352341	0.0213877	GO:0000965: mitochondrial RNA 3'-end processing (BP)
2 genes	2	34208	2	2031	0.00352341	0.0213877	GO:0014010: Schwann cell proliferation (BP)
2 genes	2	34208	2	2031	0.00352341	0.0213877	GO:0006427: histidyl-tRNA aminoacylation (BP)
2 genes	2	34208	2	2031	0.00352341	0.0213877	GO:0072182: regulation of nephron tubule epithelial cell differentiation (BP)
2 genes	2	34208	2	2031	0.00352341	0.0213877	GO:0019896: axon transport of mitochondrion (BP)
2 genes	2	34208	2	2031	0.00352341	0.0213877	GO:0046390: ribose phosphate biosynthetic process (BP)
2 genes	2	34208	2	2031	0.00352341	0.0213877	GO:0005999: xylulose biosynthetic process (BP)
2 genes	2	34208	2	2031	0.00352341	0.0213877	GO:0000053: argininosuccinate metabolic process (BP)
2 genes	2	34208	2	2031	0.00352341	0.0213877	GO:2000017: positive regulation of determination of dorsal identity (BP)
2 genes	2	34208	2	2031	0.00352341	0.0213877	GO:0034014: response to triglyceride (BP)
2 genes	2	34208	2	2031	0.00352341	0.0213877	GO:0000962: positive regulation of mitochondrial RNA catabolic process (BP)
2 genes	2	34208	2	2031	0.00352341	0.0213877	GO:0030641: regulation of cellular pH (BP)
2 genes	2	34208	2	2031	0.00352341	0.0213877	GO:0007007: inner mitochondrial membrane organization (BP)
2 genes	2	34208	2	2031	0.00352341	0.0213877	GO:0035854: eosinophil fate commitment (BP)
2 genes	2	34208	2	2031	0.00352341	0.0213877	GO:0019240: citrulline biosynthetic process (BP)
2 genes	2	34208	2	2031	0.00352341	0.0213877	GO:0030221: basophil differentiation (BP)
11 genes	73	34208	11	2031	0.00372788	0.0214975	GO:0035023: regulation of Rho protein signal transduction (BP)
9 genes	53	34208	9	2031	0.00372278	0.0215038	GO:0000165: MAPK cascade (BP)
9 genes	53	34208	9	2031	0.00372278	0.0215038	GO:0043154: negative regulation of cysteine-type endopeptidase activity involved in apoptotic process (BP)
6 genes	26	34208	6	2031	0.0035757	0.0216292	GO:0007131: reciprocal meiotic recombination (BP)
6 genes	26	34208	6	2031	0.0035757	0.0216292	GO:0006909: phagocytosis (BP)
9 genes	52	34208	9	2031	0.00325914	0.0225985	GO:0018105: peptidyl-serine phosphorylation (BP)
5 genes	18	34208	5	2031	0.00327824	0.0226401	GO:0009416: response to light stimulus (BP)
5 genes	18	34208	5	2031	0.00327824	0.0226401	GO:0046320: regulation of fatty acid oxidation (BP)
12 genes	84	34208	12	2031	0.00393429	0.02265	GO:0030182: neuron differentiation (BP)
8 genes	44	34208	8	2031	0.00396629	0.0227963	GO:0030216: keratinocyte differentiation (BP)
7 genes	35	34208	7	2031	0.00398241	0.022851	GO:0045727: positive regulation of translation (BP)
14 genes	106	34208	14	2031	0.00402255	0.0230431	GO:0007010: cytoskeleton organization (BP)
10 genes	62	34208	10	2031	0.00337327	0.0231119	GO:0050731: positive regulation of peptidyl-tyrosine phosphorylation (BP)
10 genes	62	34208	10	2031	0.00337327	0.0231119	GO:0060021: palate development (BP)
7 genes	34	34208	7	2031	0.00335518	0.0231253	GO:0042692: muscle cell differentiation (BP)
21 genes	185	34208	21	2031	0.00336386	0.0231391	GO:0006917: induction of apoptosis (BP)
8 genes	43	34208	8	2031	0.00342003	0.023386	GO:0071222: cellular response to lipopolysaccharide (BP)
4 genes	12	34208	4	2031	0.00417103	0.0237755	GO:0090004: positive regulation of establishment of protein localization in plasma membrane (BP)
4 genes	12	34208	4	2031	0.00417103	0.0237755	GO:0048255: mRNA stabilization (BP)
4 genes	12	34208	4	2031	0.00417103	0.0237755	GO:0060216: definitive hemopoiesis (BP)
5 genes	19	34208	5	2031	0.00423386	0.0239365	GO:0071320: cellular response to cAMP (BP)
5 genes	19	34208	5	2031	0.00423386	0.0239365	GO:0055007: cardiac muscle cell differentiation (BP)
5 genes	19	34208	5	2031	0.00423386	0.0239365	GO:0031648: protein destabilization (BP)
5 genes	19	34208	5	2031	0.00423386	0.0239365	GO:0010165: response to X-ray (BP)
5 genes	19	34208	5	2031	0.00423386	0.0239365	GO:0051276: chromosome organization (BP)
10 genes	64	34208	10	2031	0.0042696	0.0240992	GO:0042593: glucose homeostasis (BP)
6 genes	27	34208	6	2031	0.00436962	0.0246236	GO:0045429: positive regulation of nitric oxide biosynthetic process (BP)
11 genes	75	34208	11	2031	0.00460671	0.0258753	GO:0007409: axonogenesis (BP)
11 genes	75	34208	11	2031	0.00460671	0.0258753	GO:0060337: type I interferon-mediated signaling pathway (BP)
10 genes	65	34208	10	2031	0.00478306	0.0268224	GO:0006417: regulation of translation (BP)
9 genes	55	34208	9	2031	0.00480388	0.0268955	GO:0000079: regulation of cyclin-dependent protein kinase activity (BP)
6 genes	28	34208	6	2031	0.00528624	0.0294058	GO:0007281: germ cell development (BP)
6 genes	28	34208	6	2031	0.00528624	0.0294058	GO:0017148: negative regulation of translation (BP)
6 genes	28	34208	6	2031	0.00528624	0.0294058	GO:0032956: regulation of actin cytoskeleton organization (BP)
6 genes	28	34208	6	2031	0.00528624	0.0294058	GO:0071356: cellular response to tumor necrosis factor (BP)
5 genes	20	34208	5	2031	0.00537258	0.0297426	GO:0006325: chromatin organization (BP)
5 genes	20	34208	5	2031	0.00537258	0.0297426	GO:0051402: neuron apoptosis (BP)
5 genes	20	34208	5	2031	0.00537258	0.0297426	GO:0017144: drug metabolic process (BP)
9 genes	56	34208	9	2031	0.00542852	0.0300043	GO:0030307: positive regulation of cell growth (BP)
20 genes	181	34208	20	2031	0.00559897	0.030897	GO:0019221: cytokine-mediated signaling pathway (BP)
4 genes	13	34208	4	2031	0.00574404	0.0314966	GO:0001539: ciliary or flagellar motility (BP)
4 genes	13	34208	4	2031	0.00574404	0.0314966	GO:0031529: ruffle organization (BP)
4 genes	13	34208	4	2031	0.00574404	0.0314966	GO:0048205: COPI coating of Golgi vesicle (BP)
4 genes	13	34208	4	2031	0.00574404	0.0314966	GO:0042100: B cell proliferation (BP)
3 genes	7	34208	3	2031	0.00610337	0.032389	GO:0043297: apical junction assembly (BP)
3 genes	7	34208	3	2031	0.00610337	0.032389	GO:0006301: postreplication repair (BP)
3 genes	7	34208	3	2031	0.00610337	0.032389	GO:0071372: cellular response to follicle-stimulating hormone stimulus (BP)
3 genes	7	34208	3	2031	0.00610337	0.032389	GO:0042993: positive regulation of transcription factor import into nucleus (BP)
3 genes	7	34208	3	2031	0.00610337	0.032389	GO:0007406: negative regulation of neuroblast proliferation (BP)
3 genes	7	34208	3	2031	0.00610337	0.032389	GO:0032435: negative regulation of proteasomal ubiquitin-dependent protein catabolic process (BP)
3 genes	7	34208	3	2031	0.00610337	0.032389	GO:0033261: regulation of S phase (BP)
3 genes	7	34208	3	2031	0.00610337	0.032389	GO:0000904: cell morphogenesis involved in differentiation (BP)
3 genes	7	34208	3	2031	0.00610337	0.032389	GO:0044070: regulation of anion transport (BP)
3 genes	7	34208	3	2031	0.00610337	0.032389	GO:0042989: sequestering of actin monomers (BP)
3 genes	7	34208	3	2031	0.00610337	0.032389	GO:0045945: positive regulation of transcription from RNA polymerase III promoter (BP)
3 genes	7	34208	3	2031	0.00610337	0.032389	GO:0010944: negative regulation of transcription by competitive promoter binding (BP)
3 genes	7	34208	3	2031	0.00610337	0.032389	GO:0042267: natural killer cell mediated cytotoxicity (BP)
3 genes	7	34208	3	2031	0.00610337	0.032389	GO:0000076: DNA replication checkpoint (BP)
3 genes	7	34208	3	2031	0.00610337	0.032389	GO:0033555: multicellular organismal response to stress (BP)
3 genes	7	34208	3	2031	0.00610337	0.032389	GO:0016458: gene silencing (BP)
3 genes	7	34208	3	2031	0.00610337	0.032389	GO:0035518: histone H2A monoubiquitination (BP)
3 genes	7	34208	3	2031	0.00610337	0.032389	GO:0030219: megakaryocyte differentiation (BP)
3 genes	7	34208	3	2031	0.00610337	0.032389	GO:0000002: mitochondrial genome maintenance (BP)
10 genes	67	34208	10	2031	0.00595458	0.0325994	GO:0031175: neuron projection development (BP)
8 genes	47	34208	8	2031	0.00601379	0.0328716	GO:0016197: endosome transport (BP)
6 genes	29	34208	6	2031	0.00633603	0.0335722	GO:0051258: protein polymerization (BP)
10 genes	68	34208	10	2031	0.0066184	0.0350148	GO:0042060: wound healing (BP)
5 genes	21	34208	5	2031	0.00671163	0.0353459	GO:0005977: glycogen metabolic process (BP)
5 genes	21	34208	5	2031	0.00671163	0.0353459	GO:0045765: regulation of angiogenesis (BP)
5 genes	21	34208	5	2031	0.00671163	0.0353459	GO:0050918: positive chemotaxis (BP)
18 genes	160	34208	18	2031	0.00691439	0.0363583	GO:0001525: angiogenesis (BP)
14 genes	113	34208	14	2031	0.00711254	0.0373436	GO:0030308: negative regulation of cell growth (BP)
7 genes	39	34208	7	2031	0.00740981	0.038728	GO:0043525: positive regulation of neuron apoptosis (BP)
7 genes	39	34208	7	2031	0.00740981	0.038728	GO:0048146: positive regulation of fibroblast proliferation (BP)
7 genes	39	34208	7	2031	0.00740981	0.038728	GO:0048661: positive regulation of smooth muscle cell proliferation (BP)
6 genes	30	34208	6	2031	0.00752936	0.038825	GO:0033572: transferrin transport (BP)
6 genes	30	34208	6	2031	0.00752936	0.038825	GO:0032480: negative regulation of type I interferon production (BP)
6 genes	30	34208	6	2031	0.00752936	0.038825	GO:0007005: mitochondrion organization (BP)
6 genes	30	34208	6	2031	0.00752936	0.038825	GO:0002053: positive regulation of mesenchymal cell proliferation (BP)
6 genes	30	34208	6	2031	0.00752936	0.038825	GO:0006605: protein targeting (BP)
6 genes	30	34208	6	2031	0.00752936	0.038825	GO:0032880: regulation of protein localization (BP)
6 genes	30	34208	6	2031	0.00752936	0.038825	GO:0033077: T cell differentiation in thymus (BP)
6 genes	30	34208	6	2031	0.00752936	0.038825	GO:0007094: mitotic cell cycle spindle assembly checkpoint (BP)
6 genes	30	34208	6	2031	0.00752936	0.038825	GO:0010332: response to gamma radiation (BP)
4 genes	14	34208	4	2031	0.00766774	0.0391882	GO:0043409: negative regulation of MAPK cascade (BP)
4 genes	14	34208	4	2031	0.00766774	0.0391882	GO:0032781: positive regulation of ATPase activity (BP)
4 genes	14	34208	4	2031	0.00766774	0.0391882	GO:0032259: methylation (BP)
4 genes	14	34208	4	2031	0.00766774	0.0391882	GO:0007091: mitotic metaphase/anaphase transition (BP)
4 genes	14	34208	4	2031	0.00766774	0.0391882	GO:0016079: synaptic vesicle exocytosis (BP)
4 genes	14	34208	4	2031	0.00766774	0.0391882	GO:0043087: regulation of GTPase activity (BP)
9 genes	59	34208	9	2031	0.00768326	0.0392095	GO:0007202: activation of phospholipase C activity (BP)
5 genes	22	34208	5	2031	0.00826773	0.0420064	GO:0010977: negative regulation of neuron projection development (BP)
5 genes	22	34208	5	2031	0.00826773	0.0420064	GO:0001937: negative regulation of endothelial cell proliferation (BP)
5 genes	22	34208	5	2031	0.00826773	0.0420064	GO:0034080: CenH3-containing nucleosome assembly at centromere (BP)
6 genes	31	34208	6	2031	0.00887652	0.0450334	GO:0070555: response to interleukin-1 (BP)
11 genes	82	34208	11	2031	0.0090386	0.0457885	GO:0060333: interferon-gamma-mediated signaling pathway (BP)
3 genes	8	34208	3	2031	0.00933658	0.0460179	GO:0009072: aromatic amino acid family metabolic process (BP)
3 genes	8	34208	3	2031	0.00933658	0.0460179	GO:0046638: positive regulation of alpha-beta T cell differentiation (BP)
3 genes	8	34208	3	2031	0.00933658	0.0460179	GO:0008361: regulation of cell size (BP)
3 genes	8	34208	3	2031	0.00933658	0.0460179	GO:0019255: glucose 1-phosphate metabolic process (BP)
3 genes	8	34208	3	2031	0.00933658	0.0460179	GO:0051923: sulfation (BP)
3 genes	8	34208	3	2031	0.00933658	0.0460179	GO:0043001: Golgi to plasma membrane protein transport (BP)
3 genes	8	34208	3	2031	0.00933658	0.0460179	GO:0071364: cellular response to epidermal growth factor stimulus (BP)
3 genes	8	34208	3	2031	0.00933658	0.0460179	GO:0001553: luteinization (BP)
3 genes	8	34208	3	2031	0.00933658	0.0460179	GO:0045582: positive regulation of T cell differentiation (BP)
3 genes	8	34208	3	2031	0.00933658	0.0460179	GO:0070527: platelet aggregation (BP)
3 genes	8	34208	3	2031	0.00933658	0.0460179	GO:0034101: erythrocyte homeostasis (BP)
3 genes	8	34208	3	2031	0.00933658	0.0460179	GO:0006527: arginine catabolic process (BP)
3 genes	8	34208	3	2031	0.00933658	0.0460179	GO:0006400: tRNA modification (BP)
3 genes	8	34208	3	2031	0.00933658	0.0460179	GO:0008053: mitochondrial fusion (BP)
3 genes	8	34208	3	2031	0.00933658	0.0460179	GO:0042921: glucocorticoid receptor signaling pathway (BP)
3 genes	8	34208	3	2031	0.00933658	0.0460179	GO:0000038: very long-chain fatty acid metabolic process (BP)
3 genes	8	34208	3	2031	0.00933658	0.0460179	GO:0070584: mitochondrion morphogenesis (BP)
3 genes	8	34208	3	2031	0.00933658	0.0460179	GO:0043496: regulation of protein homodimerization activity (BP)
3 genes	8	34208	3	2031	0.00933658	0.0460179	GO:0021670: lateral ventricle development (BP)
2 genes	3	34208	2	2031	0.0101522	0.0460981	GO:0003289: atrial septum primum morphogenesis (BP)
2 genes	3	34208	2	2031	0.0101522	0.0460981	GO:0006177: GMP biosynthetic process (BP)
2 genes	3	34208	2	2031	0.0101522	0.0460981	GO:0044154: histone H3-K14 acetylation (BP)
2 genes	3	34208	2	2031	0.0101522	0.0460981	GO:0009822: alkaloid catabolic process (BP)
2 genes	3	34208	2	2031	0.0101522	0.0460981	GO:0021592: fourth ventricle development (BP)
2 genes	3	34208	2	2031	0.0101522	0.0460981	GO:0006163: purine nucleotide metabolic process (BP)
2 genes	3	34208	2	2031	0.0101522	0.0460981	GO:2001141: regulation of RNA biosynthetic process (BP)
2 genes	3	34208	2	2031	0.0101522	0.0460981	GO:0009051: pentose-phosphate shunt, oxidative branch (BP)
2 genes	3	34208	2	2031	0.0101522	0.0460981	GO:0060745: mammary gland branching involved in pregnancy (BP)
2 genes	3	34208	2	2031	0.0101522	0.0460981	GO:0035855: megakaryocyte development (BP)
2 genes	3	34208	2	2031	0.0101522	0.0460981	GO:0010950: positive regulation of endopeptidase activity (BP)
2 genes	3	34208	2	2031	0.0101522	0.0460981	GO:0030951: establishment or maintenance of microtubule cytoskeleton polarity (BP)
2 genes	3	34208	2	2031	0.0101522	0.0460981	GO:0051782: negative regulation of cell division (BP)
2 genes	3	34208	2	2031	0.0101522	0.0460981	GO:0071034: CUT catabolic process (BP)
2 genes	3	34208	2	2031	0.0101522	0.0460981	GO:0010834: telomere maintenance via telomere shortening (BP)
2 genes	3	34208	2	2031	0.0101522	0.0460981	GO:0010216: maintenance of DNA methylation (BP)
2 genes	3	34208	2	2031	0.0101522	0.0460981	GO:0051345: positive regulation of hydrolase activity (BP)
2 genes	3	34208	2	2031	0.0101522	0.0460981	GO:0042063: gliogenesis (BP)
2 genes	3	34208	2	2031	0.0101522	0.0460981	GO:0000462: maturation of SSU-rRNA from tricistronic rRNA transcript (SSU-rRNA, 5.8S rRNA, LSU-rRNA) (BP)
2 genes	3	34208	2	2031	0.0101522	0.0460981	GO:0061337: cardiac conduction (BP)
2 genes	3	34208	2	2031	0.0101522	0.0460981	GO:0071400: cellular response to oleic acid (BP)
2 genes	3	34208	2	2031	0.0101522	0.0460981	GO:0070602: regulation of centromeric sister chromatid cohesion (BP)
2 genes	3	34208	2	2031	0.0101522	0.0460981	GO:0045656: negative regulation of monocyte differentiation (BP)
2 genes	3	34208	2	2031	0.0101522	0.0460981	GO:0019985: translesion synthesis (BP)
2 genes	3	34208	2	2031	0.0101522	0.0460981	GO:0007182: common-partner SMAD protein phosphorylation (BP)
2 genes	3	34208	2	2031	0.0101522	0.0460981	GO:0072133: metanephric mesenchyme morphogenesis (BP)
2 genes	3	34208	2	2031	0.0101522	0.0460981	GO:0035372: protein localization to microtubule (BP)
2 genes	3	34208	2	2031	0.0101522	0.0460981	GO:0050684: regulation of mRNA processing (BP)
2 genes	3	34208	2	2031	0.0101522	0.0460981	GO:0051220: cytoplasmic sequestering of protein (BP)
2 genes	3	34208	2	2031	0.0101522	0.0460981	GO:0014044: Schwann cell development (BP)
2 genes	3	34208	2	2031	0.0101522	0.0460981	GO:0042159: lipoprotein catabolic process (BP)
2 genes	3	34208	2	2031	0.0101522	0.0460981	GO:0006984: ER-nucleus signaling pathway (BP)
2 genes	3	34208	2	2031	0.0101522	0.0460981	GO:0036023: embryonic skeletal limb joint morphogenesis (BP)
2 genes	3	34208	2	2031	0.0101522	0.0460981	GO:0035914: skeletal muscle cell differentiation (BP)
2 genes	3	34208	2	2031	0.0101522	0.0460981	GO:0071383: cellular response to steroid hormone stimulus (BP)
2 genes	3	34208	2	2031	0.0101522	0.0460981	GO:0070212: protein poly-ADP-ribosylation (BP)
2 genes	3	34208	2	2031	0.0101522	0.0460981	GO:0009052: pentose-phosphate shunt, non-oxidative branch (BP)
2 genes	3	34208	2	2031	0.0101522	0.0460981	GO:0006189: 'de novo' IMP biosynthetic process (BP)
2 genes	3	34208	2	2031	0.0101522	0.0460981	GO:0015980: energy derivation by oxidation of organic compounds (BP)
2 genes	3	34208	2	2031	0.0101522	0.0460981	GO:0071174: mitotic cell cycle spindle checkpoint (BP)
2 genes	3	34208	2	2031	0.0101522	0.0460981	GO:0040009: regulation of growth rate (BP)
2 genes	3	34208	2	2031	0.0101522	0.0460981	GO:0000395: nuclear mRNA 5'-splice site recognition (BP)
2 genes	3	34208	2	2031	0.0101522	0.0460981	GO:0007221: positive regulation of transcription of Notch receptor target (BP)
2 genes	3	34208	2	2031	0.0101522	0.0460981	GO:0071922: regulation of cohesin localization to chromatin (BP)
2 genes	3	34208	2	2031	0.0101522	0.0460981	GO:0022402: cell cycle process (BP)
2 genes	3	34208	2	2031	0.0101522	0.0460981	GO:0018393: internal peptidyl-lysine acetylation (BP)
2 genes	3	34208	2	2031	0.0101522	0.0460981	GO:0071242: cellular response to ammonium ion (BP)
2 genes	3	34208	2	2031	0.0101522	0.0460981	GO:0006065: UDP-glucuronate biosynthetic process (BP)
2 genes	3	34208	2	2031	0.0101522	0.0460981	GO:0070375: ERK5 cascade (BP)
2 genes	3	34208	2	2031	0.0101522	0.0460981	GO:0090084: negative regulation of inclusion body assembly (BP)
2 genes	3	34208	2	2031	0.0101522	0.0460981	GO:0003334: keratinocyte development (BP)
2 genes	3	34208	2	2031	0.0101522	0.0460981	GO:0071396: cellular response to lipid (BP)
2 genes	3	34208	2	2031	0.0101522	0.0460981	GO:0042992: negative regulation of transcription factor import into nucleus (BP)
2 genes	3	34208	2	2031	0.0101522	0.0460981	GO:0006434: seryl-tRNA aminoacylation (BP)
2 genes	3	34208	2	2031	0.0101522	0.0460981	GO:0035928: rRNA import into mitochondrion (BP)
6 genes	32	34208	6	2031	0.0103876	0.0471049	GO:0051259: protein oligomerization (BP)
12 genes	95	34208	12	2031	0.0104941	0.0475254	GO:0009653: anatomical structure morphogenesis (BP)
4 genes	15	34208	4	2031	0.00997096	0.0488662	GO:0048709: oligodendrocyte differentiation (BP)
4 genes	15	34208	4	2031	0.00997096	0.0488662	GO:0030261: chromosome condensation (BP)
4 genes	15	34208	4	2031	0.00997096	0.0488662	GO:0071385: cellular response to glucocorticoid stimulus (BP)
4 genes	15	34208	4	2031	0.00997096	0.0488662	GO:0048863: stem cell differentiation (BP)
5 genes	23	34208	5	2031	0.0100569	0.0492177	GO:0048545: response to steroid hormone stimulus (BP)

## Sheet: GO molecular function analysis
	Go molecular function analysis
	NGR = Number of annotated genes in the reference list;
	TNGR = Total number of genes in the reference list;
	NG = Number of annotated genes in the input list;
	TNG = Total number of genes in the input list;
	Hyp = Hypergeometric pValue; Hyp* = Corrected hypergeometric pValue by Benjamini and Hochberg False Discovery Rate (FDR) correction
Genes	NGR	TNGR	NG	TNG	Hyp	Hyp*	Annotations
889 genes	4463	34208	889	2031	1.05458e-277	1.40998e-274	GO:0005515: protein binding (MF)
456 genes	2120	34208	456	2031	2.19933e-140	1.47025e-137	GO:0000166: nucleotide binding (MF)
327 genes	1489	34208	327	2031	9.38211e-101	4.1813e-98	GO:0005524: ATP binding (MF)
336 genes	1785	34208	336	2031	1.91893e-84	6.41403e-82	GO:0003677: DNA binding (MF)
185 genes	623	34208	185	2031	1.1836e-78	3.16493e-76	GO:0003723: RNA binding (MF)
352 genes	2879	34208	352	2031	8.70705e-41	1.94022e-38	GO:0046872: metal ion binding (MF)
169 genes	971	34208	169	2031	3.60935e-37	6.89385e-35	GO:0016787: hydrolase activity (MF)
101 genes	437	34208	101	2031	8.13224e-33	1.3591e-30	GO:0016491: oxidoreductase activity (MF)
58 genes	157	34208	58	2031	5.5554e-31	8.25286e-29	GO:0003735: structural constituent of ribosome (MF)
69 genes	226	34208	69	2031	1.17485e-30	1.57077e-28	GO:0003682: chromatin binding (MF)
114 genes	616	34208	114	2031	1.107e-27	1.34551e-25	GO:0016740: transferase activity (MF)
134 genes	809	34208	134	2031	2.03473e-27	2.26703e-25	GO:0003676: nucleic acid binding (MF)
83 genes	370	34208	83	2031	3.09783e-26	3.186e-24	GO:0016874: ligase activity (MF)
45 genes	125	34208	45	2031	8.29211e-24	7.91897e-22	GO:0004386: helicase activity (MF)
47 genes	139	34208	47	2031	1.88512e-23	1.68027e-21	GO:0016887: ATPase activity (MF)
43 genes	120	34208	43	2031	1.01371e-22	8.47084e-21	GO:0051082: unfolded protein binding (MF)
64 genes	265	34208	64	2031	2.36922e-22	1.86333e-20	GO:0008134: transcription factor binding (MF)
91 genes	514	34208	91	2031	5.76765e-21	4.28408e-19	GO:0042803: protein homodimerization activity (MF)
56 genes	220	34208	56	2031	6.74442e-21	4.74594e-19	GO:0003713: transcription coactivator activity (MF)
112 genes	731	34208	112	2031	2.44167e-20	1.63226e-18	GO:0005488: binding (MF)
64 genes	289	34208	64	2031	3.1584e-20	2.01085e-18	GO:0003779: actin binding (MF)
212 genes	1940	34208	212	2031	2.3223e-18	1.41133e-16	GO:0008270: zinc ion binding (MF)
37 genes	119	34208	37	2031	2.17014e-17	1.26151e-15	GO:0016853: isomerase activity (MF)
47 genes	189	34208	47	2031	2.46923e-17	1.37557e-15	GO:0019899: enzyme binding (MF)
68 genes	371	34208	68	2031	8.42594e-17	4.50619e-15	GO:0003824: catalytic activity (MF)
29 genes	78	34208	29	2031	2.72963e-16	1.40366e-14	GO:0008026: ATP-dependent helicase activity (MF)
118 genes	898	34208	118	2031	4.0621e-16	2.01149e-14	GO:0003700: sequence-specific DNA binding transcription factor activity (MF)
25 genes	58	34208	25	2031	4.88959e-16	2.33478e-14	GO:0003697: single-stranded DNA binding (MF)
50 genes	237	34208	50	2031	3.23872e-15	1.44339e-13	GO:0019901: protein kinase binding (MF)
20 genes	38	34208	20	2031	3.22934e-15	1.48884e-13	GO:0051287: NAD binding (MF)
40 genes	163	34208	40	2031	9.26898e-15	3.99762e-13	GO:0044212: transcription regulatory region DNA binding (MF)
23 genes	57	34208	23	2031	4.09307e-14	1.71013e-12	GO:0042826: histone deacetylase binding (MF)
32 genes	112	34208	32	2031	4.45494e-14	1.75184e-12	GO:0031625: ubiquitin protein ligase binding (MF)
41 genes	178	34208	41	2031	4.37353e-14	1.77194e-12	GO:0000287: magnesium ion binding (MF)
54 genes	299	34208	54	2031	2.29975e-13	8.78503e-12	GO:0042802: identical protein binding (MF)
26 genes	80	34208	26	2031	3.73226e-13	1.38612e-11	GO:0032403: protein complex binding (MF)
26 genes	81	34208	26	2031	5.1872e-13	1.8744e-11	GO:0047485: protein N-terminus binding (MF)
30 genes	109	34208	30	2031	8.05182e-13	2.83297e-11	GO:0016829: lyase activity (MF)
33 genes	134	34208	33	2031	1.77607e-12	6.08873e-11	GO:0003690: double-stranded DNA binding (MF)
60 genes	373	34208	60	2031	2.00266e-12	6.6939e-11	GO:0005525: GTP binding (MF)
36 genes	159	34208	36	2031	2.6074e-12	8.50266e-11	GO:0008022: protein C-terminus binding (MF)
24 genes	74	34208	24	2031	3.13779e-12	9.98863e-11	GO:0017111: nucleoside-triphosphatase activity (MF)
19 genes	46	34208	19	2031	4.06069e-12	1.26259e-10	GO:0051087: chaperone binding (MF)
21 genes	58	34208	21	2031	6.31803e-12	1.91982e-10	GO:0003743: translation initiation factor activity (MF)
37 genes	174	34208	37	2031	9.57775e-12	2.78379e-10	GO:0009055: electron carrier activity (MF)
22 genes	65	34208	22	2031	9.5139e-12	2.82669e-10	GO:0051015: actin filament binding (MF)
15 genes	30	34208	15	2031	2.53141e-11	7.20105e-10	GO:0000049: tRNA binding (MF)
17 genes	44	34208	17	2031	1.95119e-10	5.43486e-09	GO:0004402: histone acetyltransferase activity (MF)
33 genes	158	34208	33	2031	2.04678e-10	5.58478e-09	GO:0003714: transcription corepressor activity (MF)
33 genes	162	34208	33	2031	4.07349e-10	1.08925e-08	GO:0019904: protein domain specific binding (MF)
18 genes	53	34208	18	2031	6.82019e-10	1.75358e-08	GO:0003729: mRNA binding (MF)
11 genes	18	34208	11	2031	6.79266e-10	1.78074e-08	GO:0033613: activating transcription factor binding (MF)
13 genes	27	34208	13	2031	1.00257e-09	2.52913e-08	GO:0004003: ATP-dependent DNA helicase activity (MF)
16 genes	49	34208	16	2031	1.1552e-08	2.86019e-07	GO:0003684: damaged DNA binding (MF)
19 genes	71	34208	19	2031	2.02696e-08	4.92735e-07	GO:0008565: protein transporter activity (MF)
19 genes	74	34208	19	2031	4.22018e-08	1.00757e-06	GO:0005200: structural constituent of cytoskeleton (MF)
10 genes	20	34208	10	2031	5.67593e-08	1.33135e-06	GO:0000062: fatty-acyl-CoA binding (MF)
41 genes	278	34208	41	2031	7.41608e-08	1.70953e-06	GO:0004672: protein kinase activity (MF)
12 genes	31	34208	12	2031	9.08357e-08	2.05843e-06	GO:0051219: phosphoprotein binding (MF)
50 genes	377	34208	50	2031	9.4957e-08	2.11596e-06	GO:0004674: protein serine/threonine kinase activity (MF)
14 genes	43	34208	14	2031	9.89365e-08	2.16849e-06	GO:0002039: p53 binding (MF)
9 genes	17	34208	9	2031	1.41635e-07	3.0543e-06	GO:0004812: aminoacyl-tRNA ligase activity (MF)
10 genes	22	34208	10	2031	1.77984e-07	3.77722e-06	GO:0004298: threonine-type endopeptidase activity (MF)
26 genes	141	34208	26	2031	2.3014e-07	4.80776e-06	GO:0008168: methyltransferase activity (MF)
7 genes	10	34208	7	2031	2.63519e-07	5.33827e-06	GO:0003724: RNA helicase activity (MF)
7 genes	10	34208	7	2031	2.63519e-07	5.33827e-06	GO:0016208: AMP binding (MF)
13 genes	40	34208	13	2031	2.90351e-07	5.62607e-06	GO:0030145: manganese ion binding (MF)
13 genes	40	34208	13	2031	2.90351e-07	5.62607e-06	GO:0003712: transcription cofactor activity (MF)
10 genes	23	34208	10	2031	2.98072e-07	5.69318e-06	GO:0043531: ADP binding (MF)
6 genes	7	34208	6	2031	2.89036e-07	5.76779e-06	GO:0031406: carboxylic acid binding (MF)
35 genes	231	34208	35	2031	3.3653e-07	6.33719e-06	GO:0003924: GTPase activity (MF)
11 genes	29	34208	11	2031	4.01488e-07	7.45542e-06	GO:0005158: insulin receptor binding (MF)
18 genes	77	34208	18	2031	4.39894e-07	8.05669e-06	GO:0050660: flavin adenine dinucleotide binding (MF)
10 genes	24	34208	10	2031	4.83696e-07	8.62269e-06	GO:0070491: repressing transcription factor binding (MF)
9 genes	19	34208	9	2031	4.82717e-07	8.72153e-06	GO:0004004: ATP-dependent RNA helicase activity (MF)
15 genes	56	34208	15	2031	6.1046e-07	1.05998e-05	GO:0008013: beta-catenin binding (MF)
12 genes	36	34208	12	2031	6.1005e-07	1.07321e-05	GO:0050681: androgen receptor binding (MF)
8 genes	15	34208	8	2031	6.72527e-07	1.15278e-05	GO:0016620: oxidoreductase activity, acting on the aldehyde or oxo group of donors, NAD or NADP as acceptor (MF)
10 genes	25	34208	10	2031	7.63136e-07	1.29154e-05	GO:0030331: estrogen receptor binding (MF)
10 genes	26	34208	10	2031	1.17395e-06	1.96196e-05	GO:0003746: translation elongation factor activity (MF)
61 genes	541	34208	61	2031	1.28781e-06	2.12568e-05	GO:0043565: sequence-specific DNA binding (MF)
7 genes	12	34208	7	2031	1.56428e-06	2.55054e-05	GO:0016407: acetyltransferase activity (MF)
11 genes	33	34208	11	2031	1.80082e-06	2.90084e-05	GO:0004177: aminopeptidase activity (MF)
14 genes	54	34208	14	2031	2.20999e-06	3.51756e-05	GO:0042393: histone binding (MF)
16 genes	70	34208	16	2031	2.60993e-06	4.10527e-05	GO:0016779: nucleotidyltransferase activity (MF)
6 genes	9	34208	6	2031	3.12588e-06	4.85965e-05	GO:0004029: aldehyde dehydrogenase (NAD) activity (MF)
9 genes	23	34208	9	2031	3.43633e-06	5.28089e-05	GO:0019843: rRNA binding (MF)
14 genes	56	34208	14	2031	3.53406e-06	5.36936e-05	GO:0030170: pyridoxal phosphate binding (MF)
10 genes	29	34208	10	2031	3.75618e-06	5.64272e-05	GO:0016616: oxidoreductase activity, acting on the CH-OH group of donors, NAD or NADP as acceptor (MF)
8 genes	18	34208	8	2031	3.89265e-06	5.71921e-05	GO:0003678: DNA helicase activity (MF)
12 genes	42	34208	12	2031	3.86291e-06	5.73857e-05	GO:0008092: cytoskeletal protein binding (MF)
32 genes	225	34208	32	2031	4.216e-06	5.93347e-05	GO:0005198: structural molecule activity (MF)
5 genes	6	34208	5	2031	4.18856e-06	5.95756e-05	GO:0004075: biotin carboxylase activity (MF)
5 genes	6	34208	5	2031	4.18856e-06	5.95756e-05	GO:0070087: chromo shadow domain binding (MF)
5 genes	6	34208	5	2031	4.18856e-06	5.95756e-05	GO:0004300: enoyl-CoA hydratase activity (MF)
32 genes	227	34208	32	2031	5.09352e-06	7.09378e-05	GO:0016301: kinase activity (MF)
10 genes	30	34208	10	2031	5.33435e-06	7.3526e-05	GO:0016747: transferase activity, transferring acyl groups other than amino-acyl groups (MF)
24 genes	148	34208	24	2031	6.92725e-06	9.45074e-05	GO:0005516: calmodulin binding (MF)
6 genes	10	34208	6	2031	7.41942e-06	0.0001002	GO:0048029: monosaccharide binding (MF)
9 genes	25	34208	9	2031	7.7081e-06	0.000103057	GO:0017048: Rho GTPase binding (MF)
7 genes	15	34208	7	2031	1.0845e-05	0.000138093	GO:0046933: hydrogen ion transporting ATP synthase activity, rotational mechanism (MF)
7 genes	15	34208	7	2031	1.0845e-05	0.000138093	GO:0051721: protein phosphatase 2A binding (MF)
7 genes	15	34208	7	2031	1.0845e-05	0.000138093	GO:0001047: core promoter binding (MF)
7 genes	15	34208	7	2031	1.0845e-05	0.000138093	GO:0003995: acyl-CoA dehydrogenase activity (MF)
36 genes	279	34208	36	2031	1.04573e-05	0.00013843	GO:0046982: protein heterodimerization activity (MF)
54 genes	493	34208	54	2031	1.1778e-05	0.000148558	GO:0008233: peptidase activity (MF)
4 genes	4	34208	4	2031	1.23914e-05	0.000151994	GO:0004301: epoxide hydrolase activity (MF)
4 genes	4	34208	4	2031	1.23914e-05	0.000151994	GO:0070061: fructose binding (MF)
4 genes	4	34208	4	2031	1.23914e-05	0.000151994	GO:0035173: histone kinase activity (MF)
10 genes	33	34208	10	2031	1.39491e-05	0.000169545	GO:0004693: cyclin-dependent protein kinase activity (MF)
11 genes	40	34208	11	2031	1.46291e-05	0.000176208	GO:0003755: peptidyl-prolyl cis-trans isomerase activity (MF)
6 genes	11	34208	6	2031	1.5498e-05	0.000180181	GO:0042800: histone methyltransferase activity (H3-K4 specific) (MF)
8 genes	21	34208	8	2031	1.5414e-05	0.000180777	GO:0004364: glutathione transferase activity (MF)
8 genes	21	34208	8	2031	1.5414e-05	0.000180777	GO:0048037: cofactor binding (MF)
8 genes	21	34208	8	2031	1.5414e-05	0.000180777	GO:0016818: hydrolase activity, acting on acid anhydrides, in phosphorus-containing anhydrides (MF)
7 genes	16	34208	7	2031	1.82886e-05	0.000210792	GO:0016817: hydrolase activity, acting on acid anhydrides (MF)
6 genes	12	34208	6	2031	2.94318e-05	0.000336327	GO:0000977: RNA polymerase II regulatory region sequence-specific DNA binding (MF)
13 genes	59	34208	13	2031	3.38857e-05	0.000383942	GO:0005543: phospholipid binding (MF)
5 genes	8	34208	5	2031	3.53371e-05	0.000393714	GO:0035257: nuclear hormone receptor binding (MF)
5 genes	8	34208	5	2031	3.53371e-05	0.000393714	GO:0003857: 3-hydroxyacyl-CoA dehydrogenase activity (MF)
7 genes	18	34208	7	2031	4.57847e-05	0.000505903	GO:0016922: ligand-dependent nuclear receptor binding (MF)
22 genes	145	34208	22	2031	4.7181e-05	0.000517058	GO:0005085: guanyl-nucleotide exchange factor activity (MF)
6 genes	13	34208	6	2031	5.19037e-05	0.000559639	GO:0000980: RNA polymerase II distal enhancer sequence-specific DNA binding (MF)
6 genes	13	34208	6	2031	5.19037e-05	0.000559639	GO:0030544: Hsp70 protein binding (MF)
65 genes	662	34208	65	2031	5.25304e-05	0.000561865	GO:0005509: calcium ion binding (MF)
10 genes	38	34208	10	2031	5.42435e-05	0.000575584	GO:0042277: peptide binding (MF)
4 genes	5	34208	4	2031	5.90198e-05	0.000597799	GO:0003691: double-stranded telomeric DNA binding (MF)
4 genes	5	34208	4	2031	5.90198e-05	0.000597799	GO:0009374: biotin binding (MF)
4 genes	5	34208	4	2031	5.90198e-05	0.000597799	GO:0051920: peroxiredoxin activity (MF)
4 genes	5	34208	4	2031	5.90198e-05	0.000597799	GO:0003689: DNA clamp loader activity (MF)
4 genes	5	34208	4	2031	5.90198e-05	0.000597799	GO:0000036: acyl carrier activity (MF)
4 genes	5	34208	4	2031	5.90198e-05	0.000597799	GO:0017069: snRNA binding (MF)
7 genes	19	34208	7	2031	6.87752e-05	0.000686212	GO:0008601: protein phosphatase type 2A regulator activity (MF)
7 genes	19	34208	7	2031	6.87752e-05	0.000686212	GO:0001085: RNA polymerase II transcription factor binding (MF)
5 genes	9	34208	5	2031	7.56011e-05	0.000743225	GO:0035259: glucocorticoid receptor binding (MF)
11 genes	47	34208	11	2031	7.50543e-05	0.000743315	GO:0030674: protein binding, bridging (MF)
14 genes	73	34208	14	2031	8.71627e-05	0.000850632	GO:0003777: microtubule motor activity (MF)
7 genes	20	34208	7	2031	0.000100387	0.000965596	GO:0050662: coenzyme binding (MF)
7 genes	20	34208	7	2031	0.000100387	0.000965596	GO:0016597: amino acid binding (MF)
10 genes	41	34208	10	2031	0.000109272	0.00103615	GO:0001077: RNA polymerase II core promoter proximal region sequence-specific DNA binding transcription factor activity involved in positive regulation of transcription (MF)
10 genes	41	34208	10	2031	0.000109272	0.00103615	GO:0005080: protein kinase C binding (MF)
6 genes	15	34208	6	2031	0.000136533	0.00128553	GO:0000978: RNA polymerase II core promoter proximal region sequence-specific DNA binding (MF)
7 genes	21	34208	7	2031	0.000142874	0.00132655	GO:0004601: peroxidase activity (MF)
7 genes	21	34208	7	2031	0.000142874	0.00132655	GO:0004518: nuclease activity (MF)
4 genes	6	34208	4	2031	0.000168682	0.00154471	GO:0042975: peroxisome proliferator activated receptor binding (MF)
4 genes	6	34208	4	2031	0.000168682	0.00154471	GO:0000014: single-stranded DNA specific endodeoxyribonuclease activity (MF)
3 genes	3	34208	3	2031	0.000208998	0.00174644	GO:0016619: malate dehydrogenase (oxaloacetate-decarboxylating) activity (MF)
3 genes	3	34208	3	2031	0.000208998	0.00174644	GO:0003989: acetyl-CoA carboxylase activity (MF)
3 genes	3	34208	3	2031	0.000208998	0.00174644	GO:0016508: long-chain-enoyl-CoA hydratase activity (MF)
3 genes	3	34208	3	2031	0.000208998	0.00174644	GO:0003872: 6-phosphofructokinase activity (MF)
3 genes	3	34208	3	2031	0.000208998	0.00174644	GO:0003985: acetyl-CoA C-acetyltransferase activity (MF)
3 genes	3	34208	3	2031	0.000208998	0.00174644	GO:0000739: DNA strand annealing activity (MF)
3 genes	3	34208	3	2031	0.000208998	0.00174644	GO:0043140: ATP-dependent 3'-5' DNA helicase activity (MF)
3 genes	3	34208	3	2031	0.000208998	0.00174644	GO:0035033: histone deacetylase regulator activity (MF)
3 genes	3	34208	3	2031	0.000208998	0.00174644	GO:0004165: dodecenoyl-CoA delta-isomerase activity (MF)
3 genes	3	34208	3	2031	0.000208998	0.00174644	GO:0004470: malic enzyme activity (MF)
3 genes	3	34208	3	2031	0.000208998	0.00174644	GO:0080130: L-phenylalanine:2-oxoglutarate aminotransferase activity (MF)
3 genes	3	34208	3	2031	0.000208998	0.00174644	GO:0004466: long-chain-acyl-CoA dehydrogenase activity (MF)
3 genes	3	34208	3	2031	0.000208998	0.00174644	GO:0008184: glycogen phosphorylase activity (MF)
8 genes	29	34208	8	2031	0.000212166	0.0017619	GO:0015035: protein disulfide oxidoreductase activity (MF)
29 genes	239	34208	29	2031	0.00021353	0.00176228	GO:0004842: ubiquitin-protein ligase activity (MF)
7 genes	22	34208	7	2031	0.000198834	0.00180844	GO:0003727: single-stranded RNA binding (MF)
9 genes	37	34208	9	2031	0.000245638	0.00199041	GO:0004722: protein serine/threonine phosphatase activity (MF)
9 genes	37	34208	9	2031	0.000245638	0.00199041	GO:0046332: SMAD binding (MF)
9 genes	37	34208	9	2031	0.000245638	0.00199041	GO:0050661: NADP binding (MF)
5 genes	11	34208	5	2031	0.000250687	0.00201908	GO:0042623: ATPase activity, coupled (MF)
7 genes	23	34208	7	2031	0.000271223	0.00217141	GO:0008135: translation factor activity, nucleic acid binding (MF)
8 genes	30	34208	8	2031	0.000274339	0.00218328	GO:0046966: thyroid hormone receptor binding (MF)
12 genes	63	34208	12	2031	0.000292539	0.00231435	GO:0008144: drug binding (MF)
6 genes	17	34208	6	2031	0.000304564	0.00239531	GO:0070412: R-SMAD binding (MF)
7 genes	24	34208	7	2031	0.000363363	0.00284103	GO:0016788: hydrolase activity, acting on ester bonds (MF)
4 genes	7	34208	4	2031	0.000375009	0.00291504	GO:0003680: AT DNA binding (MF)
24 genes	190	34208	24	2031	0.000399309	0.00308599	GO:0005096: GTPase activator activity (MF)
5 genes	12	34208	5	2031	0.000408726	0.00312267	GO:0008536: Ran GTPase binding (MF)
5 genes	12	34208	5	2031	0.000408726	0.00312267	GO:0000987: core promoter proximal region sequence-specific DNA binding (MF)
6 genes	18	34208	6	2031	0.000433954	0.00329657	GO:0043548: phosphatidylinositol 3-kinase binding (MF)
13 genes	75	34208	13	2031	0.00043735	0.0033036	GO:0008017: microtubule binding (MF)
19 genes	136	34208	19	2031	0.000443887	0.00331552	GO:0016746: transferase activity, transferring acyl groups (MF)
8 genes	32	34208	8	2031	0.00044335	0.0033301	GO:0004527: exonuclease activity (MF)
7 genes	25	34208	7	2031	0.000478941	0.00355747	GO:0043022: ribosome binding (MF)
12 genes	67	34208	12	2031	0.000527903	0.00389948	GO:0004519: endonuclease activity (MF)
7 genes	26	34208	7	2031	0.000622014	0.00454444	GO:0051539: 4 iron, 4 sulfur cluster binding (MF)
7 genes	26	34208	7	2031	0.000622014	0.00454444	GO:0005544: calcium-dependent phospholipid binding (MF)
5 genes	13	34208	5	2031	0.00063174	0.0045656	GO:0030332: cyclin binding (MF)
5 genes	13	34208	5	2031	0.00063174	0.0045656	GO:0070742: C2H2 zinc finger domain binding (MF)
9 genes	42	34208	9	2031	0.000673309	0.00483986	GO:0022857: transmembrane transporter activity (MF)
4 genes	8	34208	4	2031	0.00071468	0.00502909	GO:0016290: palmitoyl-CoA hydrolase activity (MF)
4 genes	8	34208	4	2031	0.00071468	0.00502909	GO:0008409: 5'-3' exonuclease activity (MF)
4 genes	8	34208	4	2031	0.00071468	0.00502909	GO:0034450: ubiquitin-ubiquitin ligase activity (MF)
4 genes	8	34208	4	2031	0.00071468	0.00502909	GO:0017076: purine nucleotide binding (MF)
11 genes	60	34208	11	2031	0.000726186	0.00508331	GO:0003774: motor activity (MF)
3 genes	4	34208	3	2031	0.000798819	0.00544909	GO:0051575: 5'-deoxyribose-5-phosphate lyase activity (MF)
3 genes	4	34208	3	2031	0.000798819	0.00544909	GO:0005010: insulin-like growth factor-activated receptor activity (MF)
3 genes	4	34208	3	2031	0.000798819	0.00544909	GO:0016799: hydrolase activity, hydrolyzing N-glycosyl compounds (MF)
3 genes	4	34208	3	2031	0.000798819	0.00544909	GO:0050815: phosphoserine binding (MF)
3 genes	4	34208	3	2031	0.000798819	0.00544909	GO:0003960: NADPH:quinone reductase activity (MF)
5 genes	14	34208	5	2031	0.000934785	0.00631216	GO:0050750: low-density lipoprotein particle receptor binding (MF)
5 genes	14	34208	5	2031	0.000934785	0.00631216	GO:0008408: 3'-5' exonuclease activity (MF)
8 genes	36	34208	8	2031	0.00103202	0.0069337	GO:0030374: ligand-dependent nuclear receptor transcription coactivator activity (MF)
6 genes	21	34208	6	2031	0.00108761	0.0072707	GO:0000981: sequence-specific DNA binding RNA polymerase II transcription factor activity (MF)
11 genes	63	34208	11	2031	0.00110854	0.0073737	GO:0031072: heat shock protein binding (MF)
12 genes	73	34208	12	2031	0.00116549	0.00771413	GO:0005089: Rho guanyl-nucleotide exchange factor activity (MF)
4 genes	9	34208	4	2031	0.00122594	0.00803474	GO:0008143: poly(A) RNA binding (MF)
4 genes	9	34208	4	2031	0.00122594	0.00803474	GO:0004017: adenylate kinase activity (MF)
8 genes	37	34208	8	2031	0.00124895	0.00806689	GO:0019900: kinase binding (MF)
8 genes	37	34208	8	2031	0.00124895	0.00806689	GO:0008094: DNA-dependent ATPase activity (MF)
8 genes	37	34208	8	2031	0.00124895	0.00806689	GO:0048306: calcium-dependent protein binding (MF)
5 genes	15	34208	5	2031	0.00133391	0.00857423	GO:0008483: transaminase activity (MF)
9 genes	46	34208	9	2031	0.00134334	0.00859355	GO:0004715: non-membrane spanning protein tyrosine kinase activity (MF)
8 genes	38	34208	8	2031	0.00150066	0.0095542	GO:0003725: double-stranded RNA binding (MF)
11 genes	66	34208	11	2031	0.0016431	0.0104115	GO:0035091: phosphatidylinositol binding (MF)
6 genes	23	34208	6	2031	0.00182668	0.0115201	GO:0001102: RNA polymerase II activating transcription factor binding (MF)
3 genes	5	34208	3	2031	0.00190852	0.0115461	GO:0004523: ribonuclease H activity (MF)
3 genes	5	34208	3	2031	0.00190852	0.0115461	GO:0004826: phenylalanine-tRNA ligase activity (MF)
3 genes	5	34208	3	2031	0.00190852	0.0115461	GO:0043559: insulin binding (MF)
3 genes	5	34208	3	2031	0.00190852	0.0115461	GO:0030235: nitric-oxide synthase regulator activity (MF)
3 genes	5	34208	3	2031	0.00190852	0.0115461	GO:0032934: sterol binding (MF)
3 genes	5	34208	3	2031	0.00190852	0.0115461	GO:0070095: fructose-6-phosphate binding (MF)
3 genes	5	34208	3	2031	0.00190852	0.0115461	GO:0043125: ErbB-3 class receptor binding (MF)
3 genes	5	34208	3	2031	0.00190852	0.0115461	GO:0004459: L-lactate dehydrogenase activity (MF)
4 genes	10	34208	4	2031	0.00194738	0.0115718	GO:0000175: 3'-5'-exoribonuclease activity (MF)
4 genes	10	34208	4	2031	0.00194738	0.0115718	GO:0019205: nucleobase-containing compound kinase activity (MF)
4 genes	10	34208	4	2031	0.00194738	0.0115718	GO:0070016: armadillo repeat domain binding (MF)
4 genes	10	34208	4	2031	0.00194738	0.0115718	GO:0003756: protein disulfide isomerase activity (MF)
5 genes	16	34208	5	2031	0.00184592	0.0115869	GO:0005099: Ras GTPase activator activity (MF)
6 genes	24	34208	6	2031	0.00231445	0.0136318	GO:0003730: mRNA 3'-UTR binding (MF)
6 genes	24	34208	6	2031	0.00231445	0.0136318	GO:0005546: phosphatidylinositol-4,5-bisphosphate binding (MF)
5 genes	17	34208	5	2031	0.00248816	0.0145269	GO:0051536: iron-sulfur cluster binding (MF)
5 genes	17	34208	5	2031	0.00248816	0.0145269	GO:0043498: cell surface binding (MF)
4 genes	11	34208	4	2031	0.00291693	0.0164554	GO:0000975: regulatory region DNA binding (MF)
4 genes	11	34208	4	2031	0.00291693	0.0164554	GO:0042162: telomeric DNA binding (MF)
4 genes	11	34208	4	2031	0.00291693	0.0164554	GO:0070411: I-SMAD binding (MF)
4 genes	11	34208	4	2031	0.00291693	0.0164554	GO:0003906: DNA-(apurinic or apyrimidinic site) lyase activity (MF)
4 genes	11	34208	4	2031	0.00291693	0.0164554	GO:0001106: RNA polymerase II transcription corepressor activity (MF)
4 genes	11	34208	4	2031	0.00291693	0.0164554	GO:0016651: oxidoreductase activity, acting on NADH or NADPH (MF)
4 genes	11	34208	4	2031	0.00291693	0.0164554	GO:0030983: mismatched DNA binding (MF)
6 genes	25	34208	6	2031	0.00289408	0.0168234	GO:0015078: hydrogen ion transmembrane transporter activity (MF)
2 genes	2	34208	2	2031	0.00352341	0.0168846	GO:0070006: metalloaminopeptidase activity (MF)
2 genes	2	34208	2	2031	0.00352341	0.0168846	GO:0032143: single thymine insertion binding (MF)
2 genes	2	34208	2	2031	0.00352341	0.0168846	GO:0004069: L-aspartate:2-oxoglutarate aminotransferase activity (MF)
2 genes	2	34208	2	2031	0.00352341	0.0168846	GO:0004353: glutamate dehydrogenase [NAD(P)+] activity (MF)
2 genes	2	34208	2	2031	0.00352341	0.0168846	GO:0004649: poly(ADP-ribose) glycohydrolase activity (MF)
2 genes	2	34208	2	2031	0.00352341	0.0168846	GO:0004821: histidine-tRNA ligase activity (MF)
2 genes	2	34208	2	2031	0.00352341	0.0168846	GO:0004315: 3-oxoacyl-[acyl-carrier-protein] synthase activity (MF)
2 genes	2	34208	2	2031	0.00352341	0.0168846	GO:0004468: lysine N-acetyltransferase activity (MF)
2 genes	2	34208	2	2031	0.00352341	0.0168846	GO:0002060: purine base binding (MF)
2 genes	2	34208	2	2031	0.00352341	0.0168846	GO:0004473: malate dehydrogenase (oxaloacetate-decarboxylating) (NADP+) activity (MF)
2 genes	2	34208	2	2031	0.00352341	0.0168846	GO:0048256: flap endonuclease activity (MF)
2 genes	2	34208	2	2031	0.00352341	0.0168846	GO:0004613: phosphoenolpyruvate carboxykinase (GTP) activity (MF)
2 genes	2	34208	2	2031	0.00352341	0.0168846	GO:0004611: phosphoenolpyruvate carboxykinase activity (MF)
2 genes	2	34208	2	2031	0.00352341	0.0168846	GO:0005471: ATP:ADP antiporter activity (MF)
2 genes	2	34208	2	2031	0.00352341	0.0168846	GO:0004816: asparagine-tRNA ligase activity (MF)
2 genes	2	34208	2	2031	0.00352341	0.0168846	GO:0004658: propionyl-CoA carboxylase activity (MF)
2 genes	2	34208	2	2031	0.00352341	0.0168846	GO:0008670: 2,4-dienoyl-CoA reductase (NADPH) activity (MF)
2 genes	2	34208	2	2031	0.00352341	0.0168846	GO:0004822: isoleucine-tRNA ligase activity (MF)
2 genes	2	34208	2	2031	0.00352341	0.0168846	GO:0004618: phosphoglycerate kinase activity (MF)
2 genes	2	34208	2	2031	0.00352341	0.0168846	GO:0071568: UFM1 conjugating enzyme activity (MF)
2 genes	2	34208	2	2031	0.00352341	0.0168846	GO:0004743: pyruvate kinase activity (MF)
2 genes	2	34208	2	2031	0.00352341	0.0168846	GO:0015207: adenine transmembrane transporter activity (MF)
2 genes	2	34208	2	2031	0.00352341	0.0168846	GO:0017099: very-long-chain-acyl-CoA dehydrogenase activity (MF)
2 genes	2	34208	2	2031	0.00352341	0.0168846	GO:0000774: adenyl-nucleotide exchange factor activity (MF)
2 genes	2	34208	2	2031	0.00352341	0.0168846	GO:0016509: long-chain-3-hydroxyacyl-CoA dehydrogenase activity (MF)
2 genes	2	34208	2	2031	0.00352341	0.0168846	GO:0004450: isocitrate dehydrogenase (NADP+) activity (MF)
2 genes	2	34208	2	2031	0.00352341	0.0168846	GO:0043532: angiostatin binding (MF)
2 genes	2	34208	2	2031	0.00352341	0.0168846	GO:0004820: glycine-tRNA ligase activity (MF)
2 genes	2	34208	2	2031	0.00352341	0.0168846	GO:0004831: tyrosine-tRNA ligase activity (MF)
2 genes	2	34208	2	2031	0.00352341	0.0168846	GO:0030060: L-malate dehydrogenase activity (MF)
2 genes	2	34208	2	2031	0.00352341	0.0168846	GO:0031720: haptoglobin binding (MF)
2 genes	2	34208	2	2031	0.00352341	0.0168846	GO:0004053: arginase activity (MF)
2 genes	2	34208	2	2031	0.00352341	0.0168846	GO:0004421: hydroxymethylglutaryl-CoA synthase activity (MF)
2 genes	2	34208	2	2031	0.00352341	0.0168846	GO:0009378: four-way junction helicase activity (MF)
2 genes	2	34208	2	2031	0.00352341	0.0168846	GO:0043176: amine binding (MF)
2 genes	2	34208	2	2031	0.00352341	0.0168846	GO:0004815: aspartate-tRNA ligase activity (MF)
2 genes	2	34208	2	2031	0.00352341	0.0168846	GO:0004337: geranyltranstransferase activity (MF)
2 genes	2	34208	2	2031	0.00352341	0.0168846	GO:0004161: dimethylallyltranstransferase activity (MF)
2 genes	2	34208	2	2031	0.00352341	0.0168846	GO:0004352: glutamate dehydrogenase (NAD+) activity (MF)
3 genes	6	34208	3	2031	0.00364836	0.0170554	GO:0016628: oxidoreductase activity, acting on the CH-CH group of donors, NAD or NADP as acceptor (MF)
3 genes	6	34208	3	2031	0.00364836	0.0170554	GO:0032052: bile acid binding (MF)
3 genes	6	34208	3	2031	0.00364836	0.0170554	GO:0030976: thiamine pyrophosphate binding (MF)
3 genes	6	34208	3	2031	0.00364836	0.0170554	GO:0032405: MutLalpha complex binding (MF)
3 genes	6	34208	3	2031	0.00364836	0.0170554	GO:0035497: cAMP response element binding (MF)
3 genes	6	34208	3	2031	0.00364836	0.0170554	GO:0001190: RNA polymerase II transcription factor binding transcription factor activity involved in positive regulation of transcription (MF)
3 genes	6	34208	3	2031	0.00364836	0.0170554	GO:0016868: intramolecular transferase activity, phosphotransferases (MF)
7 genes	34	34208	7	2031	0.00335518	0.0186911	GO:0019825: oxygen binding (MF)
7 genes	34	34208	7	2031	0.00335518	0.0186911	GO:0035064: methylated histone residue binding (MF)
13 genes	93	34208	13	2031	0.00333789	0.0187511	GO:0046983: protein dimerization activity (MF)
4 genes	12	34208	4	2031	0.00417103	0.0193634	GO:0046965: retinoid X receptor binding (MF)
4 genes	12	34208	4	2031	0.00417103	0.0193634	GO:0004303: estradiol 17-beta-dehydrogenase activity (MF)
5 genes	19	34208	5	2031	0.00423386	0.0195871	GO:0004629: phospholipase C activity (MF)
15 genes	120	34208	15	2031	0.00502334	0.0231593	GO:0017124: SH3 domain binding (MF)
8 genes	46	34208	8	2031	0.00525828	0.0241592	GO:0016820: hydrolase activity, acting on acid anhydrides, catalyzing transmembrane movement of substances (MF)
6 genes	28	34208	6	2031	0.00528624	0.0242045	GO:0003887: DNA-directed DNA polymerase activity (MF)
5 genes	20	34208	5	2031	0.00537258	0.0243496	GO:0005504: fatty acid binding (MF)
5 genes	20	34208	5	2031	0.00537258	0.0243496	GO:0046961: proton-transporting ATPase activity, rotational mechanism (MF)
5 genes	20	34208	5	2031	0.00537258	0.0243496	GO:0051059: NF-kappaB binding (MF)
4 genes	13	34208	4	2031	0.00574404	0.0256849	GO:0030675: Rac GTPase activator activity (MF)
4 genes	13	34208	4	2031	0.00574404	0.0256849	GO:0004407: histone deacetylase activity (MF)
4 genes	13	34208	4	2031	0.00574404	0.0256849	GO:0017075: syntaxin-1 binding (MF)
4 genes	13	34208	4	2031	0.00574404	0.0256849	GO:0042301: phosphate ion binding (MF)
3 genes	7	34208	3	2031	0.00610337	0.0265805	GO:0043566: structure-specific DNA binding (MF)
3 genes	7	34208	3	2031	0.00610337	0.0265805	GO:0008308: voltage-gated anion channel activity (MF)
3 genes	7	34208	3	2031	0.00610337	0.0265805	GO:0042974: retinoic acid receptor binding (MF)
3 genes	7	34208	3	2031	0.00610337	0.0265805	GO:0015288: porin activity (MF)
3 genes	7	34208	3	2031	0.00610337	0.0265805	GO:0050733: RS domain binding (MF)
3 genes	7	34208	3	2031	0.00610337	0.0265805	GO:0050786: RAGE receptor binding (MF)
3 genes	7	34208	3	2031	0.00610337	0.0265805	GO:0004022: alcohol dehydrogenase (NAD) activity (MF)
3 genes	7	34208	3	2031	0.00610337	0.0265805	GO:0001882: nucleoside binding (MF)
23 genes	220	34208	23	2031	0.00615883	0.0267349	GO:0016772: transferase activity, transferring phosphorus-containing groups (MF)
6 genes	29	34208	6	2031	0.00633603	0.0274151	GO:0043621: protein self-association (MF)
7 genes	38	34208	7	2031	0.0064013	0.0274312	GO:0005057: receptor signaling protein activity (MF)
7 genes	38	34208	7	2031	0.0064013	0.0274312	GO:0004091: carboxylesterase activity (MF)
7 genes	38	34208	7	2031	0.0064013	0.0274312	GO:0003899: DNA-directed RNA polymerase activity (MF)
5 genes	21	34208	5	2031	0.00671163	0.0285779	GO:0045296: cadherin binding (MF)
5 genes	21	34208	5	2031	0.00671163	0.0285779	GO:0030971: receptor tyrosine kinase binding (MF)
9 genes	58	34208	9	2031	0.00686443	0.0291357	GO:0004197: cysteine-type endopeptidase activity (MF)
15 genes	125	34208	15	2031	0.00731305	0.0309416	GO:0020037: heme binding (MF)
4 genes	14	34208	4	2031	0.00766774	0.03234	GO:0042288: MHC class I protein binding (MF)
7 genes	40	34208	7	2031	0.0085311	0.0358682	GO:0001948: glycoprotein binding (MF)
13 genes	104	34208	13	2031	0.00863899	0.0362079	GO:0003705: sequence-specific distal enhancer binding RNA polymerase II transcription factor activity (MF)
8 genes	50	34208	8	2031	0.00877836	0.0366771	GO:0005070: SH3/SH2 adaptor activity (MF)
6 genes	31	34208	6	2031	0.00887652	0.0368568	GO:0005496: steroid binding (MF)
6 genes	31	34208	6	2031	0.00887652	0.0368568	GO:0008060: ARF GTPase activator activity (MF)
3 genes	8	34208	3	2031	0.00933658	0.0374865	GO:0070402: NADPH binding (MF)
3 genes	8	34208	3	2031	0.00933658	0.0374865	GO:0004033: aldo-keto reductase (NADP) activity (MF)
3 genes	8	34208	3	2031	0.00933658	0.0374865	GO:0047617: acyl-CoA hydrolase activity (MF)
3 genes	8	34208	3	2031	0.00933658	0.0374865	GO:0030515: snoRNA binding (MF)
3 genes	8	34208	3	2031	0.00933658	0.0374865	GO:0030898: actin-dependent ATPase activity (MF)
3 genes	8	34208	3	2031	0.00933658	0.0374865	GO:0005536: glucose binding (MF)
3 genes	8	34208	3	2031	0.00933658	0.0374865	GO:0070628: proteasome binding (MF)
3 genes	8	34208	3	2031	0.00933658	0.0374865	GO:0004726: non-membrane spanning protein tyrosine phosphatase activity (MF)
3 genes	8	34208	3	2031	0.00933658	0.0374865	GO:0030676: Rac guanyl-nucleotide exchange factor activity (MF)
3 genes	8	34208	3	2031	0.00933658	0.0374865	GO:0043295: glutathione binding (MF)
3 genes	8	34208	3	2031	0.00933658	0.0374865	GO:0070577: histone acetyl-lysine binding (MF)
2 genes	3	34208	2	2031	0.0101522	0.0375998	GO:0001849: complement component C1q binding (MF)
2 genes	3	34208	2	2031	0.0101522	0.0375998	GO:0004828: serine-tRNA ligase activity (MF)
2 genes	3	34208	2	2031	0.0101522	0.0375998	GO:0004591: oxoglutarate dehydrogenase (succinyl-transferring) activity (MF)
2 genes	3	34208	2	2031	0.0101522	0.0375998	GO:0016212: kynurenine-oxoglutarate transaminase activity (MF)
2 genes	3	34208	2	2031	0.0101522	0.0375998	GO:0008426: protein kinase C inhibitor activity (MF)
2 genes	3	34208	2	2031	0.0101522	0.0375998	GO:0050254: rhodopsin kinase activity (MF)
2 genes	3	34208	2	2031	0.0101522	0.0375998	GO:0047894: flavonol 3-sulfotransferase activity (MF)
2 genes	3	34208	2	2031	0.0101522	0.0375998	GO:0008186: RNA-dependent ATPase activity (MF)
2 genes	3	34208	2	2031	0.0101522	0.0375998	GO:0032139: dinucleotide insertion or deletion binding (MF)
2 genes	3	34208	2	2031	0.0101522	0.0375998	GO:0001103: RNA polymerase II repressing transcription factor binding (MF)
2 genes	3	34208	2	2031	0.0101522	0.0375998	GO:0003987: acetate-CoA ligase activity (MF)
2 genes	3	34208	2	2031	0.0101522	0.0375998	GO:0032142: single guanine insertion binding (MF)
2 genes	3	34208	2	2031	0.0101522	0.0375998	GO:0004449: isocitrate dehydrogenase (NAD+) activity (MF)
2 genes	3	34208	2	2031	0.0101522	0.0375998	GO:0004775: succinate-CoA ligase (ADP-forming) activity (MF)
2 genes	3	34208	2	2031	0.0101522	0.0375998	GO:0044183: protein binding involved in protein folding (MF)
2 genes	3	34208	2	2031	0.0101522	0.0375998	GO:0051880: G-quadruplex DNA binding (MF)
2 genes	3	34208	2	2031	0.0101522	0.0375998	GO:0004645: phosphorylase activity (MF)
2 genes	3	34208	2	2031	0.0101522	0.0375998	GO:0004477: methenyltetrahydrofolate cyclohydrolase activity (MF)
2 genes	3	34208	2	2031	0.0101522	0.0375998	GO:0005094: Rho GDP-dissociation inhibitor activity (MF)
2 genes	3	34208	2	2031	0.0101522	0.0375998	GO:0004332: fructose-bisphosphate aldolase activity (MF)
2 genes	3	34208	2	2031	0.0101522	0.0375998	GO:0047374: methylumbelliferyl-acetate deacetylase activity (MF)
2 genes	3	34208	2	2031	0.0101522	0.0375998	GO:0032357: oxidized purine DNA binding (MF)
2 genes	3	34208	2	2031	0.0101522	0.0375998	GO:0004705: JUN kinase activity (MF)
2 genes	3	34208	2	2031	0.0101522	0.0375998	GO:0008097: 5S rRNA binding (MF)
2 genes	3	34208	2	2031	0.0101522	0.0375998	GO:0031177: phosphopantetheine binding (MF)
2 genes	3	34208	2	2031	0.0101522	0.0375998	GO:0016309: 1-phosphatidylinositol-5-phosphate 4-kinase activity (MF)
4 genes	15	34208	4	2031	0.00997096	0.0399137	GO:0008353: RNA polymerase II carboxy-terminal domain kinase activity (MF)
5 genes	23	34208	5	2031	0.0100569	0.0401376	GO:0051117: ATPase binding (MF)
18 genes	169	34208	18	2031	0.0118811	0.0438811	GO:0008289: lipid binding (MF)
7 genes	43	34208	7	2031	0.0126408	0.0465585	GO:0008307: structural constituent of muscle (MF)
4 genes	16	34208	4	2031	0.0126793	0.046572	GO:0017022: myosin binding (MF)
3 genes	9	34208	3	2031	0.0133919	0.0483918	GO:0016627: oxidoreductase activity, acting on the CH-CH group of donors (MF)
3 genes	9	34208	3	2031	0.0133919	0.0483918	GO:0008139: nuclear localization sequence binding (MF)
3 genes	9	34208	3	2031	0.0133919	0.0483918	GO:0005521: lamin binding (MF)
3 genes	9	34208	3	2031	0.0133919	0.0483918	GO:0004520: endodeoxyribonuclease activity (MF)
3 genes	9	34208	3	2031	0.0133919	0.0483918	GO:0031267: small GTPase binding (MF)
3 genes	9	34208	3	2031	0.0133919	0.0483918	GO:0017166: vinculin binding (MF)

## Sheet: KEGG pathway analysis
KEGG pathway analysis
NGR = Number of annotated genes in the reference list;
TNGR = Total number of genes in the reference list;
NG = Number of annotated genes in the input list;
TNG = Total number of genes in the input list;
Hyp = Hypergeometric pValue; Hyp* = Corrected hypergeometric pValue by Benjamini and Hochberg False Discovery Rate (FDR) correction
Genes	NGR	TNGR	NG	TNG	Hyp	Hyp*	Annotations
60 genes	118	34208	60	2031	9.15635e-42	1.96862e-39	(KEGG) 03040: Spliceosome
44 genes	86	34208	44	2031	3.89049e-31	4.18227e-29	(KEGG) 03010: Ribosome
32 genes	62	34208	32	2031	3.53137e-23	2.53081e-21	(KEGG) 00010: Glycolysis / Gluconeogenesis
47 genes	145	34208	47	2031	1.46516e-22	7.87525e-21	(KEGG) 03013: RNA transport
24 genes	39	34208	24	2031	3.41094e-20	1.22225e-18	(KEGG) 00620: Pyruvate metabolism
22 genes	32	34208	22	2031	3.3936e-20	1.45925e-18	(KEGG) 00640: Propanoate metabolism
25 genes	44	34208	25	2031	8.88848e-20	2.38878e-18	(KEGG) 00280: Valine, leucine and isoleucine degradation
24 genes	40	34208	24	2031	8.04723e-20	2.47165e-18	(KEGG) 00970: Aminoacyl-tRNA biosynthesis
39 genes	123	34208	39	2031	1.38167e-18	3.30064e-17	(KEGG) 04110: Cell cycle
47 genes	180	34208	47	2031	2.98801e-18	6.42423e-17	(KEGG) 05016: Huntington's disease
20 genes	30	34208	20	2031	4.57954e-18	8.95091e-17	(KEGG) 00020: Citrate cycle (TCA cycle)
61 genes	324	34208	61	2031	8.89399e-16	1.59351e-14	(KEGG) 05200: Pathways in cancer
21 genes	41	34208	21	2031	1.35395e-15	2.23922e-14	(KEGG) 00071: Fatty acid metabolism
27 genes	76	34208	27	2031	1.07976e-14	1.6582e-13	(KEGG) 04146: Peroxisome
28 genes	88	34208	28	2031	8.55923e-14	1.22682e-12	(KEGG) 05215: Prostate cancer
21 genes	49	34208	21	2031	1.23904e-13	1.66496e-12	(KEGG) 00310: Lysine degradation
21 genes	54	34208	21	2031	1.23805e-12	1.56577e-11	(KEGG) 05130: Pathogenic Escherichia coli infection
16 genes	30	34208	16	2031	1.47645e-12	1.76353e-11	(KEGG) 00650: Butanoate metabolism
31 genes	129	34208	31	2031	1.64143e-11	1.8574e-10	(KEGG) 05012: Parkinson's disease
23 genes	73	34208	23	2031	1.74021e-11	1.87072e-10	(KEGG) 05220: Chronic myeloid leukemia
17 genes	40	34208	17	2031	3.16845e-11	3.24389e-10	(KEGG) 03050: Proteasome
17 genes	41	34208	17	2031	5.1128e-11	4.9966e-10	(KEGG) 00380: Tryptophan metabolism
15 genes	32	34208	15	2031	8.24297e-11	7.70539e-10	(KEGG) 00250: Alanine, aspartate and glutamate metabolism
19 genes	54	34208	19	2031	1.13515e-10	1.0169e-09	(KEGG) 00330: Arginine and proline metabolism
13 genes	27	34208	13	2031	1.00257e-09	8.62212e-09	(KEGG) 00030: Pentose phosphate pathway
27 genes	124	34208	27	2031	3.38164e-09	2.79636e-08	(KEGG) 04722: Neurotrophin signaling pathway
28 genes	133	34208	28	2031	3.88924e-09	3.09699e-08	(KEGG) 04910: Insulin signaling pathway
31 genes	159	34208	31	2031	4.16472e-09	3.19791e-08	(KEGG) 04141: Protein processing in endoplasmic reticulum
14 genes	35	34208	14	2031	4.59328e-09	3.40536e-08	(KEGG) 03030: DNA replication
31 genes	163	34208	31	2031	7.74664e-09	5.55176e-08	(KEGG) 05010: Alzheimer's disease
10 genes	18	34208	10	2031	1.50061e-08	1.04075e-07	(KEGG) 00630: Glyoxylate and dicarboxylate metabolism
35 genes	209	34208	35	2031	2.68313e-08	1.80273e-07	(KEGG) 04810: Regulation of actin cytoskeleton
19 genes	73	34208	19	2031	3.32083e-08	2.16357e-07	(KEGG) 03008: Ribosome biogenesis in eukaryotes
18 genes	66	34208	18	2031	3.44485e-08	2.17836e-07	(KEGG) 03018: RNA degradation
18 genes	68	34208	18	2031	5.71656e-08	3.5116e-07	(KEGG) 00980: Metabolism of xenobiotics by cytochrome P450
26 genes	133	34208	26	2031	6.81947e-08	4.07274e-07	(KEGG) 05160: Hepatitis C
17 genes	62	34208	17	2031	7.5538e-08	4.38937e-07	(KEGG) 05210: Colorectal cancer
7 genes	9	34208	7	2031	8.33654e-08	4.71673e-07	(KEGG) 00072: Synthesis and degradation of ketone bodies
18 genes	70	34208	18	2031	9.29125e-08	4.87224e-07	(KEGG) 00982: Drug metabolism - cytochrome P450
18 genes	70	34208	18	2031	9.29125e-08	4.87224e-07	(KEGG) 03320: PPAR signaling pathway
18 genes	70	34208	18	2031	9.29125e-08	4.87224e-07	(KEGG) 05212: Pancreatic cancer
18 genes	71	34208	18	2031	1.17584e-07	6.01917e-07	(KEGG) 04520: Adherens junction
14 genes	44	34208	14	2031	1.37178e-07	6.85889e-07	(KEGG) 00480: Glutathione metabolism
20 genes	88	34208	20	2031	1.68164e-07	8.2171e-07	(KEGG) 05322: Systemic lupus erythematosus
28 genes	158	34208	28	2031	1.9105e-07	9.12792e-07	(KEGG) 00230: Purine metabolism
13 genes	39	34208	13	2031	2.07256e-07	9.68699e-07	(KEGG) 00350: Tyrosine metabolism
17 genes	67	34208	17	2031	2.5927e-07	1.18602e-06	(KEGG) 04920: Adipocytokine signaling pathway
10 genes	23	34208	10	2031	2.98072e-07	1.33511e-06	(KEGG) 03430: Mismatch repair
38 genes	262	34208	38	2031	3.37537e-07	1.48103e-06	(KEGG) 04010: MAPK signaling pathway
16 genes	61	34208	16	2031	3.54748e-07	1.52542e-06	(KEGG) 05131: Shigellosis
12 genes	36	34208	12	2031	6.1005e-07	2.57178e-06	(KEGG) 00051: Fructose and mannose metabolism
24 genes	130	34208	24	2031	6.46371e-07	2.67249e-06	(KEGG) 00190: Oxidative phosphorylation
8 genes	15	34208	8	2031	6.72527e-07	2.67765e-06	(KEGG) 00900: Terpenoid backbone biosynthesis
18 genes	79	34208	18	2031	6.61067e-07	2.68169e-06	(KEGG) 03015: mRNA surveillance pathway
15 genes	57	34208	15	2031	7.83127e-07	3.06131e-06	(KEGG) 05221: Acute myeloid leukemia
24 genes	135	34208	24	2031	1.3123e-06	5.0383e-06	(KEGG) 04120: Ubiquitin mediated proteolysis
23 genes	130	34208	23	2031	2.35752e-06	8.73909e-06	(KEGG) 04530: Tight junction
23 genes	130	34208	23	2031	2.35752e-06	8.73909e-06	(KEGG) 05162: Measles
16 genes	70	34208	16	2031	2.60993e-06	9.51078e-06	(KEGG) 05100: Bacterial invasion of epithelial cells
18 genes	87	34208	18	2031	2.93403e-06	1.05136e-05	(KEGG) 04012: ErbB signaling pathway
29 genes	193	34208	29	2031	3.90925e-06	1.37785e-05	(KEGG) 04144: Endocytosis
11 genes	36	34208	11	2031	4.73819e-06	1.64308e-05	(KEGG) 00270: Cysteine and methionine metabolism
29 genes	197	34208	29	2031	5.90109e-06	2.01386e-05	(KEGG) 04510: Focal adhesion
18 genes	92	34208	18	2031	6.74709e-06	2.2666e-05	(KEGG) 04666: Fc gamma R-mediated phagocytosis
12 genes	46	34208	12	2031	1.08911e-05	3.60245e-05	(KEGG) 04330: Notch signaling pathway
9 genes	26	34208	9	2031	1.11674e-05	3.63785e-05	(KEGG) 00410: beta-Alanine metabolism
15 genes	70	34208	15	2031	1.23388e-05	3.95946e-05	(KEGG) 05211: Renal cell carcinoma
10 genes	33	34208	10	2031	1.39491e-05	4.41037e-05	(KEGG) 03410: Base excision repair
7 genes	16	34208	7	2031	1.82886e-05	5.69863e-05	(KEGG) 00360: Phenylalanine metabolism
11 genes	41	34208	11	2031	1.89237e-05	5.81228e-05	(KEGG) 03420: Nucleotide excision repair
9 genes	28	34208	9	2031	2.21539e-05	6.70856e-05	(KEGG) 05216: Thyroid cancer
19 genes	110	34208	19	2031	2.45647e-05	7.23481e-05	(KEGG) 04114: Oocyte meiosis
23 genes	149	34208	23	2031	2.42286e-05	7.23494e-05	(KEGG) 04310: Wnt signaling pathway
17 genes	93	34208	17	2031	3.05061e-05	8.86326e-05	(KEGG) 00240: Pyrimidine metabolism
14 genes	67	34208	14	2031	3.2226e-05	9.23813e-05	(KEGG) 04115: p53 signaling pathway
12 genes	52	34208	12	2031	4.14608e-05	0.000115767	(KEGG) 05213: Endometrial cancer
16 genes	86	34208	16	2031	4.1346e-05	0.000116966	(KEGG) 04914: Progesterone-mediated oocyte maturation
12 genes	53	34208	12	2031	5.07179e-05	0.000139799	(KEGG) 05223: Non-small cell lung cancer
13 genes	63	34208	13	2031	7.02054e-05	0.000191065	(KEGG) 05214: Glioma
12 genes	56	34208	12	2031	8.99695e-05	0.000241793	(KEGG) 04612: Antigen processing and presentation
11 genes	48	34208	11	2031	9.21776e-05	0.000244669	(KEGG) 00520: Amino sugar and nucleotide sugar metabolism
11 genes	49	34208	11	2031	0.000112528	0.000295043	(KEGG) 04961: Endocrine and other factor-regulated calcium reabsorption
15 genes	84	34208	15	2031	0.000115728	0.000299777	(KEGG) 05222: Small cell lung cancer
8 genes	27	34208	8	2031	0.000122067	0.000312434	(KEGG) 00052: Galactose metabolism
7 genes	21	34208	7	2031	0.000142874	0.000361387	(KEGG) 01040: Biosynthesis of unsaturated fatty acids
13 genes	68	34208	13	2031	0.000159502	0.000398754	(KEGG) 04720: Long-term potentiation
4 genes	6	34208	4	2031	0.000168682	0.000416858	(KEGG) 00061: Fatty acid biosynthesis
7 genes	22	34208	7	2031	0.000198834	0.000480329	(KEGG) 04964: Proximal tubule bicarbonate reclamation
11 genes	52	34208	11	2031	0.000197988	0.000483721	(KEGG) 04150: mTOR signaling pathway
7 genes	23	34208	7	2031	0.000271223	0.000647921	(KEGG) 00910: Nitrogen metabolism
6 genes	18	34208	6	2031	0.000433954	0.00102528	(KEGG) 00670: One carbon pool by folate
16 genes	107	34208	16	2031	0.000572682	0.00133833	(KEGG) 04660: T cell receptor signaling pathway
14 genes	88	34208	14	2031	0.000659751	0.00152523	(KEGG) 04540: Gap junction
4 genes	8	34208	4	2031	0.00071468	0.00163464	(KEGG) 00062: Fatty acid elongation in mitochondria
10 genes	51	34208	10	2031	0.000724497	0.00163965	(KEGG) 00500: Starch and sucrose metabolism
3 genes	4	34208	3	2031	0.000798819	0.00177058	(KEGG) 00471: D-Glutamine and D-glutamate metabolism
12 genes	70	34208	12	2031	0.000794634	0.00177965	(KEGG) 05218: Melanoma
15 genes	102	34208	15	2031	0.0010012	0.00219652	(KEGG) 05146: Amoebiasis
7 genes	29	34208	7	2031	0.00126208	0.00274087	(KEGG) 00340: Histidine metabolism
12 genes	76	34208	12	2031	0.00166946	0.00351895	(KEGG) 04070: Phosphatidylinositol signaling system
12 genes	76	34208	12	2031	0.00166946	0.00351895	(KEGG) 04260: Cardiac muscle contraction
13 genes	86	34208	13	2031	0.00164203	0.00353035	(KEGG) 04210: Apoptosis
8 genes	39	34208	8	2031	0.00179094	0.00373837	(KEGG) 03022: Basal transcription factors
11 genes	67	34208	11	2031	0.00186216	0.00384966	(KEGG) 05120: Epithelial cell signaling in Helicobacter pylori infection
3 genes	5	34208	3	2031	0.00190852	0.00390792	(KEGG) 00400: Phenylalanine, tyrosine and tryptophan biosynthesis
14 genes	98	34208	14	2031	0.00192719	0.00390893	(KEGG) 04912: GnRH signaling pathway
4 genes	10	34208	4	2031	0.00194738	0.00391297	(KEGG) 00290: Valine, leucine and isoleucine biosynthesis
7 genes	32	34208	7	2031	0.00232861	0.00463566	(KEGG) 00260: Glycine, serine and threonine metabolism
9 genes	50	34208	9	2031	0.00246845	0.00486895	(KEGG) 05014: Amyotrophic lateral sclerosis (ALS)
9 genes	51	34208	9	2031	0.00284215	0.00550506	(KEGG) 00983: Drug metabolism - other enzymes
15 genes	113	34208	15	2031	0.00282678	0.00552506	(KEGG) 04270: Vascular smooth muscle contraction
8 genes	42	34208	8	2031	0.00293391	0.00563207	(KEGG) 05219: Bladder cancer
10 genes	61	34208	10	2031	0.00298501	0.00567945	(KEGG) 00830: Retinol metabolism
9 genes	52	34208	9	2031	0.00325914	0.00614662	(KEGG) 00140: Steroid hormone biosynthesis
4 genes	13	34208	4	2031	0.00574404	0.0106463	(KEGG) 00450: Selenocompound metabolism
4 genes	13	34208	4	2031	0.00574404	0.0106463	(KEGG) 03450: Non-homologous end-joining
9 genes	57	34208	9	2031	0.00611412	0.0112353	(KEGG) 00562: Inositol phosphate metabolism
19 genes	172	34208	19	2031	0.00682848	0.0124417	(KEGG) 05152: Tuberculosis
14 genes	113	34208	14	2031	0.00711254	0.0128504	(KEGG) 04670: Leukocyte transendothelial migration
13 genes	102	34208	13	2031	0.00736354	0.013193	(KEGG) 05142: Chagas disease (American trypanosomiasis)
20 genes	186	34208	20	2031	0.00753004	0.0133798	(KEGG) 04062: Chemokine signaling pathway
10 genes	70	34208	10	2031	0.00811695	0.0143045	(KEGG) 04622: RIG-I-like receptor signaling pathway
9 genes	60	34208	9	2031	0.00857444	0.0149878	(KEGG) 04623: Cytosolic DNA-sensing pathway
10 genes	71	34208	10	2031	0.0089577	0.0155315	(KEGG) 04976: Bile secretion
5 genes	23	34208	5	2031	0.0100569	0.0172979	(KEGG) 03060: Protein export
2 genes	3	34208	2	2031	0.0101522	0.0173233	(KEGG) 00300: Lysine biosynthesis
10 genes	73	34208	10	2031	0.0108374	0.0183468	(KEGG) 05412: Arrhythmogenic right ventricular cardiomyopathy (ARVC)
7 genes	42	34208	7	2031	0.0111397	0.0187113	(KEGG) 04960: Aldosterone-regulated sodium reabsorption
6 genes	33	34208	6	2031	0.0120723	0.0201206	(KEGG) 05143: African trypanosomiasis
4 genes	16	34208	4	2031	0.0126793	0.0209696	(KEGG) 00120: Primary bile acid biosynthesis
7 genes	44	34208	7	2031	0.0142819	0.0234398	(KEGG) 04962: Vasopressin-regulated water reabsorption
18 genes	175	34208	18	2031	0.0165249	0.0269155	(KEGG) 04020: Calcium signaling pathway
7 genes	46	34208	7	2031	0.0180101	0.0291141	(KEGG) 04930: Type II diabetes mellitus
5 genes	28	34208	5	2031	0.0229968	0.0368978	(KEGG) 03020: RNA polymerase
10 genes	82	34208	10	2031	0.0231708	0.0369017	(KEGG) 04350: TGF-beta signaling pathway
5 genes	29	34208	5	2031	0.0264678	0.0418425	(KEGG) 00591: Linoleic acid metabolism
11 genes	98	34208	11	2031	0.0308166	0.0483619	(KEGG) 04916: Melanogenesis
13 genes	123	34208	13	2031	0.0310828	0.0484261	(KEGG) 05145: Toxoplasmosis
8 genes	63	34208	8	2031	0.0323004	0.049961	(KEGG) 05416: Viral myocarditis

## Sheet: Co-occurence Analysis
Co-occurrence analysis for cellular component and KEGG pathways
NGR = Number of annotated genes in the reference list;
TNGR = Total number of genes in the reference list;
NG = Number of annotated genes in the input list;
TNG = Total number of genes in the input list;
Hyp = Hypergeometric pValue; Hyp* = Corrected hypergeometric pValue by Benjamini and Hochberg False Discovery Rate (FDR) correction
Genes	NGR	TNGR	NG	TNG	Hyp	Hyp*	Annotations
31 genes	101	34208	31	2031	1.24729e-14	4.6952e-13	GO:0005739: mitochondrion (CC)
							(KEGG) 05016: Huntington's disease
26 genes	89	34208	26	2031	5.9517e-12	1.49611e-10	GO:0005739: mitochondrion (CC)
							(KEGG) 05016: Huntington's disease
							(KEGG) 05012: Parkinson's disease
27 genes	95	34208	27	2031	4.82063e-12	1.24522e-10	GO:0005739: mitochondrion (CC)
							(KEGG) 05012: Parkinson's disease
23 genes	100	34208	23	2031	1.60748e-08	1.93285e-07	(KEGG) 05016: Huntington's disease
							(KEGG) 05010: Alzheimer's disease
20 genes	91	34208	20	2031	3.01164e-07	2.43631e-06	(KEGG) 05016: Huntington's disease
							(KEGG) 05010: Alzheimer's disease
							(KEGG) 05012: Parkinson's disease
19 genes	82	34208	19	2031	2.4611e-07	2.16387e-06	GO:0005739: mitochondrion (CC)
							(KEGG) 05016: Huntington's disease
							(KEGG) 05010: Alzheimer's disease
							(KEGG) 05012: Parkinson's disease
50 genes	161	34208	50	2031	5.74197e-23	5.4447e-21	GO:0005634: nucleus (CC)
							(KEGG) 05200: Pathways in cancer
34 genes	116	34208	34	2031	3.10948e-15	1.29406e-13	(KEGG) 05200: Pathways in cancer
							GO:0005829: cytosol (CC)
Co-occurrence analysis for cellular component and Biological process
Genes	NGR	TNGR	NG	TNG	Hyp	Hyp*	Annotations
90 genes	177	34208	90	2031	4.59773e-62	4.0086e-59	GO:0010467: gene expression (BP)
							GO:0005829: cytosol (CC)
101 genes	260	34208	101	2031	1.77091e-55	1.1713e-52	GO:0005634: nucleus (CC)
							GO:0008380: RNA splicing (BP)
34 genes	57	34208	34	2031	2.13681e-27	2.19177e-25	GO:0005739: mitochondrion (CC)
							GO:0044255: cellular lipid metabolic process (BP)
19 genes	24	34208	19	2031	1.46924e-19	7.78493e-18	GO:0005739: mitochondrion (CC)
							GO:0006635: fatty acid beta-oxidation (BP)
