# Supplementary material for: Systematic analysis of human lysine acetylation proteins and accurate prediction of human lysine acetylation through bi-relative adapted binomial score Bayes feature representation
Source: Royal Society of Chemistry journal article supplement (doi:10.1039/c2mb25251a), 2012-08-13
Supplement: c2mb25251a_4.xlsx [file c2mb25251a_4.xlsx]

## Sheet: Table S4.1
Table S4.1 Overall Human lysine acetylation motifs returned by Motif-X (http://motif-x.med.harvard.edu)(motif length=15, occurrences>=20, p-value<0.000001).
#	Motif	Motif Score	Foreground Matches	Foreground Size	Background Mathches	Background Size	Fold Increase
1	......GKY......	32	42	4138	40	31794	8.07
2	.....F.K.......	16	348	4096	960	31754	2.81
3	.......KY......	16	257	3748	733	30794	2.88
4	.....Y.K.......	16	204	3491	779	30061	2.25
5	.......KF......	16	183	3287	794	29282	2.05
6	.....I.K.......	13.7	259	3104	1450	28488	1.64
7	......GK.......	12.99	284	2845	1717	27038	1.57
8	.....L.K.......	13.05	406	2561	2791	25321	1.44
9	.......K.F.....	10.05	125	2155	703	22530	1.86
10	.....W.K.......	9.06	62	2030	278	21827	2.4
11	.......K.....K.	7.61	254	1968	1971	21549	1.41
12	.......K...K...	7.37	225	1714	1793	19578	1.43
13	.......K..R....	6.58	126	1489	941	17785	1.6

## Sheet: Table S4.2
Table S4.2 lysine acetylation motifs on nucleus acetylproteins returned by Motif-X (http://motif-x.med.harvard.edu)(motif length=15, occurrences>=20, p-value<0.000001).
#	Motif	Motif Score	Foreground Matches	Foreground Size	Background Mathches	Background Size	Fold Increase
1	......GKY......	25.17	24	2179	40	31794	8.75
2	.....F.K.......	16	191	2155	960	31754	2.93
3	.......KY......	16	119	1964	733	30794	2.55
4	......GK.......	15.48	209	1845	1884	30061	1.81
5	.....Y.K.......	11.06	92	1636	724	28177	2.19
6	.......KP......	9.49	128	1544	1268	27453	1.79
7	.......K...K...	10.57	212	1416	2477	26185	1.58
8	.......K.....K.	7.34	157	1204	1997	23708	1.55
9	.......KF......	6.83	63	1047	639	21711	2.04
Sequence logo for corresponding motifs(central K refers to acetylated lysine)

## Sheet: Table S4.3
Table S4.3 lysine acetylation motifs on cytosol acetylproteins returned by Motif-X (http://motif-x.med.harvard.edu)(motif length=15, occurrences>=20, p-value<0.000001).
#	Motif	Motif Score	Foreground Matches	Foreground Size	Background Mathches	Background Size	Fold Increase
1	.....F.K.......	16	109	1208	965	31794	2.97
2	.......KY......	16	93	1099	768	30829	3.4
3	.......K.I.....	9.31	99	1006	1523	30061	1.94
4	.....I.K.......	6.84	83	907	1426	28538	1.83
5	.....Y.K.......	6.32	49	824	735	27112	2.19
6	.....L.K.......	6.07	129	775	2871	26377	1.53
7	.....W.K.......	6	25	646	292	23506	3.12
Sequence logo for corresponding motifs(central K refers to acetylated lysine)

## Sheet: Table S4.4
Table S4.4 lysine acetylation motifs on mitochondrion acetylproteins returned by Motif-X (http://motif-x.med.harvard.edu)(motif length=15, occurrences>=20, p-value<0.000001).
#	Motif	Motif Score	Foreground Matches	Foreground Size	Background Mathches	Background Size	Fold Increase
1	.......KY......	16	71	762	797	31794	3.72
2	.....F.K.......	13.13	62	691	936	30997	2.97
3	.....I.K.......	8.46	68	629	1502	30061	2.16
4	.....Y.K.......	8.6	43	561	779	28559	2.81
5	.....V.K.......	7.57	68	518	1789	27780	2.04
6	.......K.F.....	6.3	36	450	819	25991	2.54
Sequence logo for corresponding motifs(central K refers to acetylated lysine)
